# Supplementary material for: Evidence for additive and synergistic action of mammalian enhancers during cell fate determination
Source: eLife. 2021 Mar 26;10:e65381. doi: 10.7554/eLife.65381 (PMC8004103; doi:10.7554/eLife.65381)
Supplement: Supplementary file 1. [file elife-65381-supp1.xlsx]

## Sheet: ChromAcc
A0	dbSUPER_blood	dbSUPER_all	A12	dbSUPER_blood	dbSUPER_all	A24	dbSUPER_blood	dbSUPER_all	A96	dbSUPER_blood	dbSUPER_all
PTPRE	TRUE	TRUE	RNFT2	TRUE	FALSE	RNFT2	TRUE	TRUE	RNFT2	TRUE	TRUE
RNFT2	TRUE	TRUE	ADAP2	TRUE	TRUE	ADAP2	TRUE	TRUE	RP11-403P17.5	FALSE	FALSE
ADAP2	TRUE	TRUE	PLCD3	TRUE	TRUE	PLCD3	TRUE	TRUE	TK2	TRUE	TRUE
HBEGF	FALSE	TRUE	PRKACA	FALSE	TRUE	PRKACA	FALSE	TRUE	ADAP2	TRUE	TRUE
HIVEP2	TRUE	TRUE	HBEGF	FALSE	TRUE	RPS11	TRUE	TRUE	PLCD3	TRUE	TRUE
NOC2L	FALSE	TRUE	HIVEP2	TRUE	TRUE	FMNL2	FALSE	TRUE	PRKACA	FALSE	TRUE
ETS1	TRUE	TRUE	NOC2L	FALSE	TRUE	HIVEP2	TRUE	TRUE	FMNL2	FALSE	TRUE
HMGB1	TRUE	TRUE	GPR137B	TRUE	TRUE	QKI	TRUE	TRUE	HIVEP2	TRUE	TRUE
COPRS	TRUE	TRUE	PDCD4	TRUE	TRUE	CDK6	TRUE	TRUE	PPP3CC	TRUE	TRUE
TRIM28	FALSE	TRUE	ETS1	TRUE	TRUE	NOC2L	FALSE	TRUE	NOC2L	FALSE	TRUE
ZMAT3	FALSE	TRUE	RNASEH2B	TRUE	TRUE	GPR137B	TRUE	TRUE	PDCD4	TRUE	TRUE
SLC2A9	TRUE	TRUE	ATP10A	TRUE	TRUE	PDCD4	TRUE	TRUE	RNASEH2B	TRUE	TRUE
STIM2	TRUE	TRUE	COPRS	TRUE	TRUE	RNASEH2B	TRUE	TRUE	PCDH9	TRUE	TRUE
SYNPO	FALSE	TRUE	CCL3	TRUE	TRUE	PCDH9	TRUE	TRUE	ATP10A	TRUE	TRUE
SPARC	TRUE	TRUE	CBX2	FALSE	FALSE	ATP10A	TRUE	TRUE	COPRS	TRUE	TRUE
S1PR1	TRUE	TRUE	TRIM28	FALSE	TRUE	COPRS	TRUE	TRUE	CCL3	TRUE	TRUE
ST3GAL4	TRUE	TRUE	SLCO4A1	TRUE	TRUE	CCL3	TRUE	TRUE	FMNL1	TRUE	TRUE
KATNAL1	TRUE	TRUE	ZMAT3	FALSE	TRUE	FMNL1	TRUE	TRUE	CBX2	FALSE	FALSE
MDGA2	FALSE	FALSE	SLC2A9	TRUE	TRUE	SLCO4A1	TRUE	TRUE	CBWD2	FALSE	FALSE
PRMT7	TRUE	TRUE	STIM2	TRUE	TRUE	ZMAT3	FALSE	TRUE	CCDC74A	FALSE	FALSE
RAB11FIP4	TRUE	TRUE	SYNPO	FALSE	TRUE	SLC2A9	TRUE	TRUE	ARL4C	TRUE	TRUE
SLC27A5	FALSE	TRUE	SPARC	TRUE	TRUE	STIM2	TRUE	TRUE	SLCO4A1	TRUE	TRUE
RRP7A	FALSE	TRUE	RBM28	FALSE	TRUE	TCOF1	TRUE	TRUE	BACH1	TRUE	TRUE
TBL1XR1	TRUE	TRUE	RORB	TRUE	TRUE	SYNPO	FALSE	TRUE	ZMAT3	FALSE	TRUE
CCDC149	FALSE	FALSE	LYST	TRUE	TRUE	SPARC	TRUE	TRUE	SLC2A9	TRUE	TRUE
SLC36A1	FALSE	FALSE	ZEB1	TRUE	TRUE	RBM28	FALSE	FALSE	STIM2	TRUE	TRUE
HLA-E	FALSE	TRUE	ST3GAL4	TRUE	TRUE	VLDLR	TRUE	TRUE	SYNPO	FALSE	TRUE
ATP6V1C1	TRUE	TRUE	FGF9	TRUE	TRUE	RORB	TRUE	TRUE	RBM28	FALSE	TRUE
SUM	17	25	MDGA2	FALSE	FALSE	GK	TRUE	TRUE	CALD1	FALSE	TRUE
			PRMT7	TRUE	TRUE	HDAC6	FALSE	FALSE	CPQ	FALSE	TRUE
			RAB11FIP4	TRUE	TRUE	LYST	TRUE	TRUE	TLE1	FALSE	TRUE
			CCL5	TRUE	TRUE	ZEB1	TRUE	TRUE	HDAC6	FALSE	FALSE
			NAT14	FALSE	FALSE	NCOA4	TRUE	TRUE	ZEB1	TRUE	TRUE
			SLC27A5	FALSE	TRUE	MDGA2	FALSE	FALSE	CDK2AP1	TRUE	TRUE
			PXDN	TRUE	TRUE	PRMT7	TRUE	TRUE	FGF9	TRUE	TRUE
			CABLES2	FALSE	TRUE	RAB11FIP4	TRUE	TRUE	MDGA2	FALSE	FALSE
			BACH1	TRUE	TRUE	CCL5	TRUE	TRUE	RAB11FIP4	TRUE	TRUE
			RRP7A	FALSE	TRUE	HEXIM1	TRUE	TRUE	CCL5	TRUE	TRUE
			TBL1XR1	TRUE	TRUE	NAT14	FALSE	FALSE	HEXIM1	TRUE	TRUE
			CCDC149	FALSE	FALSE	PXDN	TRUE	TRUE	NAT14	FALSE	FALSE
			SLC36A1	FALSE	FALSE	CABLES2	FALSE	TRUE	FOSL2	TRUE	TRUE
			HLA-E	FALSE	TRUE	BACH1	TRUE	TRUE	PSD4	TRUE	TRUE
			PTPN12	TRUE	TRUE	NDUFA6	FALSE	FALSE	NUP35	TRUE	FALSE
			LRRC4	TRUE	TRUE	RRP7A	FALSE	TRUE	FARSB	FALSE	FALSE
			KBTBD11	FALSE	TRUE	TBL1XR1	TRUE	TRUE	GINS1	FALSE	FALSE
			ATP6V1C1	TRUE	TRUE	CCDC149	FALSE	FALSE	CABLES2	FALSE	TRUE
			ANXA1	TRUE	TRUE	PDGFRB	FALSE	TRUE	RRP7A	FALSE	TRUE
			KLF4	TRUE	TRUE	SLC36A1	FALSE	FALSE	TBL1XR1	TRUE	TRUE
			SUM	31	42	HLA-E	FALSE	TRUE	CCDC149	FALSE	FALSE
						AOAH	TRUE	TRUE	PTPN12	TRUE	TRUE
						PTPN12	TRUE	TRUE	LRRC4	TRUE	TRUE
						LRRC4	TRUE	TRUE	BNIP3L	FALSE	FALSE
						KBTBD11	FALSE	TRUE	SDC2	FALSE	TRUE
						ATP6V1C1	TRUE	TRUE	ATP6V1C1	TRUE	TRUE
						ANXA1	TRUE	TRUE	TLE4	TRUE	TRUE
						KLF4	TRUE	TRUE	KLF4	TRUE	TRUE
						FGF13	FALSE	FALSE	FGF13	FALSE	FALSE
						AFF2	TRUE	TRUE	AFF2	TRUE	TRUE
						SUM	40	50	SUM	34	45

## Sheet: BRD4
0	dbSUPER_blood	dbSUPER_all	12	dbSUPER_blood	dbSUPER_all	24	dbSUPER_blood	dbSUPER_all	96	dbSUPER_blood	dbSUPER_all
MIB2	FALSE	TRUE	MIB2	FALSE	TRUE	MIB2	FALSE	TRUE	MIB2	FALSE	TRUE
PRKCZ	TRUE	TRUE	LPAR5	TRUE	TRUE	PRKCZ	TRUE	TRUE	PRKCZ	TRUE	TRUE
E2F2	TRUE	TRUE	GSE1	TRUE	TRUE	LYST	TRUE	TRUE	RASGRP2	FALSE	TRUE
ID3	TRUE	TRUE	RNF166	TRUE	TRUE	RASGRP2	FALSE	TRUE	PPP1CA	TRUE	TRUE
RASGRP2	FALSE	TRUE	CTU2	TRUE	TRUE	PPP1CA	TRUE	TRUE	LPAR5	TRUE	TRUE
PPP1CA	TRUE	TRUE	PLCD3	TRUE	TRUE	LPAR5	TRUE	TRUE	ESYT1_ZC3H10_PA2G4	TRUE	TRUE
UBASH3B	TRUE	TRUE	FMNL1	TRUE	TRUE	ESYT1_ZC3H10_PA2G4	TRUE	TRUE	ORAI1	TRUE	TRUE
LPAR5	TRUE	TRUE	BAHCC1	FALSE	TRUE	ORAI1	TRUE	TRUE	RMDN3	FALSE	FALSE
ESYT1_ZC3H10_PA2G4	TRUE	TRUE	ARHGAP45	FALSE	FALSE	TFAP4	FALSE	TRUE	TFAP4	FALSE	TRUE
ORAI1	TRUE	TRUE	MUM1	FALSE	FALSE	GSE1	TRUE	TRUE	GSE1	TRUE	TRUE
SCARB1	TRUE	TRUE	GAMT	FALSE	TRUE	KLHDC4	TRUE	TRUE	KLHDC4	TRUE	TRUE
DHX37	TRUE	TRUE	GNG7	TRUE	TRUE	ZFPM1	TRUE	TRUE	ZFPM1	TRUE	TRUE
SYNE3	TRUE	TRUE	UHRF1	FALSE	TRUE	RNF166	TRUE	TRUE	RNF166	TRUE	TRUE
RMDN3	FALSE	FALSE	TNPO2	FALSE	FALSE	CTU2	TRUE	TRUE	CTU2	TRUE	TRUE
TFAP4	FALSE	TRUE	ANKLE1	FALSE	FALSE	SLC43A2	TRUE	TRUE	SLC43A2	TRUE	TRUE
GSE1	TRUE	TRUE	SLC27A1	FALSE	TRUE	RAPGEFL1	FALSE	TRUE	RAPGEFL1	FALSE	TRUE
KLHDC4	TRUE	TRUE	FAM129C	FALSE	TRUE	PLCD3	TRUE	TRUE	PLCD3	TRUE	TRUE
ZFPM1	TRUE	TRUE	LAIR1	TRUE	TRUE	FMNL1	TRUE	TRUE	FMNL1	TRUE	TRUE
RNF166	TRUE	TRUE	TTYH1	TRUE	TRUE	RHBDF2	TRUE	TRUE	RHBDF2	TRUE	TRUE
CTU2	TRUE	TRUE	DBN1	FALSE	TRUE	2021-09-09	TRUE	TRUE	2021-09-09	TRUE	TRUE
NXN	FALSE	TRUE	DOK3_DDX41	TRUE	TRUE	BAHCC1	FALSE	TRUE	BAHCC1	FALSE	TRUE
SLC43A2	TRUE	TRUE	C7orf50	TRUE	TRUE	ARHGAP45	FALSE	FALSE	ARHGAP45	FALSE	FALSE
RAPGEFL1	FALSE	TRUE	DAGLB_KDELR2	FALSE	TRUE	MUM1	FALSE	FALSE	MUM1	FALSE	FALSE
PLCD3	TRUE	TRUE	RFC2	TRUE	TRUE	GAMT	FALSE	TRUE	GAMT	FALSE	TRUE
FMNL1	TRUE	TRUE	DENND3	TRUE	TRUE	GNG7	TRUE	TRUE	GNG7	TRUE	TRUE
PITPNC1	TRUE	TRUE	GSDMD	FALSE	TRUE	UHRF1	FALSE	TRUE	UHRF1	FALSE	TRUE
CASKIN2	FALSE	TRUE	HGH1	FALSE	FALSE	INSR	TRUE	TRUE	INSR	TRUE	TRUE
TSEN54	FALSE	FALSE	VPS28_TONSL	FALSE	TRUE	PRAM1	FALSE	TRUE	PRAM1	FALSE	TRUE
RHBDF2	TRUE	TRUE	CDK9_FPGS	FALSE	TRUE	MYO1F	FALSE	FALSE	MYO1F	FALSE	FALSE
MXRA7	FALSE	TRUE	EGFL7	TRUE	TRUE	TNPO2	FALSE	FALSE	TNPO2	FALSE	FALSE
MGAT5B	TRUE	TRUE	FAM69B	TRUE	TRUE	ANKLE1	FALSE	FALSE	PRKACA	FALSE	TRUE
SEPT9"	TRUE	TRUE	AURKAIP1	FALSE	FALSE	SLC27A1	FALSE	TRUE	HSH2D	TRUE	TRUE
BAHCC1	FALSE	TRUE	ATAD3A	FALSE	FALSE	FAM129C	FALSE	TRUE	ANKLE1	FALSE	FALSE
TBCD	FALSE	TRUE	CDT1	TRUE	TRUE	ELL	TRUE	TRUE	SLC27A1	FALSE	TRUE
ARHGAP45	FALSE	FALSE	POLRMT	FALSE	FALSE	VASP	TRUE	TRUE	FAM129C	FALSE	TRUE
MUM1	FALSE	FALSE	PALM	FALSE	TRUE	RPS11	TRUE	TRUE	ELL	TRUE	TRUE
GAMT	FALSE	TRUE	ARID3A	TRUE	TRUE	FCGRT	TRUE	TRUE	VASP	TRUE	TRUE
TCF3	TRUE	TRUE	PCSK4	FALSE	FALSE	RCN3	TRUE	TRUE	RPS11	TRUE	TRUE
GNG7	TRUE	TRUE	MEX3D	FALSE	FALSE	LAIR1	TRUE	TRUE	FCGRT	TRUE	TRUE
UHRF1	FALSE	TRUE	LMNB2	TRUE	TRUE	TTYH1	TRUE	TRUE	RCN3	TRUE	TRUE
INSR	TRUE	TRUE	NCLN	TRUE	TRUE	ZFP36L2	TRUE	TRUE	LAIR1	TRUE	TRUE
PRAM1	FALSE	TRUE	JUNB	TRUE	TRUE	PTMA	TRUE	TRUE	TTYH1	TRUE	TRUE
MYO1F	FALSE	FALSE	IL17RA	TRUE	TRUE	TPD52L2	FALSE	TRUE	ZFP36L2	TRUE	TRUE
TNPO2	FALSE	FALSE	LFNG	TRUE	TRUE	RTN4R	FALSE	TRUE	TPD52L2	FALSE	TRUE
PRKACA	FALSE	TRUE	GNA12	TRUE	TRUE	PDXP_SH3BP1	TRUE	TRUE	RTN4R	FALSE	TRUE
RASAL3	FALSE	FALSE	CLIP2	FALSE	TRUE	TRIOBP	FALSE	TRUE	PDXP_SH3BP1	TRUE	TRUE
HSH2D	TRUE	TRUE	FAM86B1	FALSE	FALSE	HDAC10_MAPK12	FALSE	FALSE	TRIOBP	FALSE	TRUE
ANKLE1	FALSE	FALSE	LONRF1	TRUE	TRUE	DBN1	FALSE	TRUE	HDAC10_MAPK12	FALSE	FALSE
SLC27A1	FALSE	TRUE	ADGRB1	FALSE	FALSE	DOK3_DDX41	TRUE	TRUE	DBN1	FALSE	TRUE
FAM129C	FALSE	TRUE	RHPN1	TRUE	TRUE	PRKAR1B	TRUE	TRUE	DOK3_DDX41	TRUE	TRUE
CD22	TRUE	TRUE	RXRA	TRUE	TRUE	C7orf50	TRUE	TRUE	CDKN1A	TRUE	TRUE
VASP	TRUE	TRUE	COL5A1	TRUE	TRUE	INTS1	TRUE	TRUE	C7orf50	TRUE	TRUE
RPS11	TRUE	TRUE	DVL1	FALSE	TRUE	RADIL	FALSE	FALSE	INTS1	TRUE	TRUE
FCGRT	TRUE	TRUE	ATAD3B	FALSE	FALSE	DAGLB_KDELR2	FALSE	TRUE	DAGLB_KDELR2	FALSE	TRUE
RCN3	TRUE	TRUE	TMEM201	TRUE	FALSE	RFC2	TRUE	TRUE	RFC2	TRUE	TRUE
LAIR1	TRUE	TRUE	LTBR	FALSE	FALSE	ARHGEF10_KBTBD11-OT1	FALSE	TRUE	PPP3CC	TRUE	TRUE
TTYH1	TRUE	TRUE	ATP6V0D1	FALSE	TRUE	KBTBD11	FALSE	TRUE	DENND3	TRUE	TRUE
MZF1	TRUE	TRUE	HEXIM1	TRUE	TRUE	PPP3CC	TRUE	TRUE	GSDMD	FALSE	TRUE
PXDN	TRUE	TRUE	MRPL12_RP13-1032I1.10_SLC25A10	FALSE	TRUE	DENND3	TRUE	TRUE	HGH1	FALSE	FALSE
ZFP36L2	TRUE	TRUE	BSG	FALSE	TRUE	GSDMD	FALSE	TRUE	VPS28_TONSL	FALSE	TRUE
PTMA	TRUE	TRUE	RPS15	FALSE	TRUE	HGH1	FALSE	FALSE	CDK9_FPGS	FALSE	TRUE
TPD52L2	FALSE	TRUE	LSM7	TRUE	TRUE	VPS28_TONSL	FALSE	TRUE	EGFL7	TRUE	TRUE
RTN4R	FALSE	TRUE	SMIM24	FALSE	FALSE	CDK9_FPGS	FALSE	TRUE	FAM69B	TRUE	TRUE
ZNF70	FALSE	TRUE	GTPBP3	FALSE	FALSE	EGFL7	TRUE	TRUE	ANAPC2	FALSE	TRUE
PDXP_SH3BP1	TRUE	TRUE	LILRA5	FALSE	FALSE	FAM69B	TRUE	TRUE	NOC2L	FALSE	TRUE
TRIOBP	FALSE	TRUE	MYH9	TRUE	TRUE	ANAPC2	FALSE	TRUE	AURKAIP1	FALSE	FALSE
MCAT	FALSE	TRUE	CHST12	FALSE	FALSE	NOC2L	FALSE	TRUE	ATAD3A	FALSE	FALSE
HDAC10_MAPK12	FALSE	FALSE	TNRC18	TRUE	TRUE	AURKAIP1	FALSE	FALSE	ATHL1	FALSE	TRUE
C5orf56	FALSE	TRUE	GRID2IP	FALSE	FALSE	ATAD3A	FALSE	FALSE	B4GALNT4	TRUE	TRUE
ERGIC1	TRUE	TRUE	CTSB	TRUE	TRUE	PNRC2	TRUE	TRUE	PTDSS2	FALSE	TRUE
DBN1	FALSE	TRUE	AGO2	TRUE	TRUE	GPR137B	TRUE	TRUE	CLCF1	TRUE	TRUE
DOK3_DDX41	TRUE	TRUE	ZNF696	TRUE	TRUE	ATHL1	FALSE	TRUE	TMEM120B	TRUE	TRUE
RACK1	FALSE	FALSE	PLEC	TRUE	TRUE	B4GALNT4	TRUE	TRUE	POLE	FALSE	TRUE
CDKN1A	TRUE	TRUE	CPSF1_SLC39A4	FALSE	TRUE	PTDSS2	FALSE	TRUE	C16orf13	FALSE	FALSE
CCND3	TRUE	TRUE	SUM	36	54	CLCF1	TRUE	TRUE	RHOT2_WDR90	FALSE	TRUE
C7orf50	TRUE	TRUE				TMEM120B	TRUE	TRUE	METRN	FALSE	TRUE
INTS1	TRUE	TRUE				POLE	FALSE	TRUE	ZNF764_AC002310.13	TRUE	TRUE
RADIL	FALSE	FALSE				C16orf13	FALSE	FALSE	SLC7A5	TRUE	TRUE
DAGLB_KDELR2	FALSE	TRUE				RHOT2_WDR90	FALSE	TRUE	CDT1	TRUE	TRUE
RFC2	TRUE	TRUE				METRN	FALSE	TRUE	GSG2	TRUE	TRUE
ARHGEF10_KBTBD11-OT1	FALSE	TRUE				ZNF764_AC002310.13	TRUE	TRUE	POLRMT	FALSE	FALSE
KBTBD11	FALSE	TRUE				IRF8	TRUE	TRUE	PALM	FALSE	TRUE
PPP3CC	TRUE	TRUE				SLC7A5	TRUE	TRUE	ARID3A	TRUE	TRUE
CPA6	TRUE	TRUE				CDT1	TRUE	TRUE	PCSK4	FALSE	FALSE
DENND3	TRUE	TRUE				GSG2	TRUE	TRUE	MEX3D	FALSE	FALSE
GSDMD	FALSE	TRUE				POLRMT	FALSE	FALSE	LMNB2	TRUE	TRUE
HGH1	FALSE	FALSE				PALM	FALSE	TRUE	NCLN	TRUE	TRUE
VPS28_TONSL	FALSE	TRUE				ARID3A	TRUE	TRUE	ARHGEF18_CTB-133G6.1	TRUE	TRUE
CDK9_FPGS	FALSE	TRUE				PCSK4	FALSE	FALSE	MRPL4	FALSE	FALSE
EGFL7	TRUE	TRUE				MEX3D	FALSE	FALSE	JUNB	TRUE	TRUE
FAM69B	TRUE	TRUE				LMNB2	TRUE	TRUE	JAK3	FALSE	FALSE
FUT7_NPDC1_RP11-229P13.27	FALSE	FALSE				NCLN	TRUE	TRUE	RASIP1	FALSE	FALSE
DPP7	FALSE	FALSE				ARHGEF18_CTB-133G6.1	TRUE	TRUE	ADARB1	TRUE	TRUE
ANAPC2	FALSE	TRUE				MRPL4	FALSE	FALSE	IL17RA	TRUE	TRUE
ARHGAP4_NAA10	FALSE	TRUE				JUNB	TRUE	TRUE	LGALS1	FALSE	FALSE
NOC2L	FALSE	TRUE				RASIP1	FALSE	FALSE	LFNG	TRUE	TRUE
AURKAIP1	FALSE	FALSE				MYADM	TRUE	TRUE	GNA12	TRUE	TRUE
ATAD3A	FALSE	FALSE				SNAI1	TRUE	TRUE	CLIP2	FALSE	TRUE
ATP13A2	FALSE	TRUE				PMEPA1	TRUE	TRUE	LONRF1	TRUE	TRUE
ATHL1	FALSE	TRUE				ADARB1	TRUE	TRUE	ADGRB1	FALSE	FALSE
B4GALNT4	TRUE	TRUE				IL17RA	TRUE	TRUE	RHPN1	TRUE	TRUE
PTDSS2	FALSE	TRUE				LGALS1	FALSE	FALSE	RXRA	TRUE	TRUE
CLCF1	TRUE	TRUE				PDGFA	TRUE	TRUE	COL5A1	TRUE	TRUE
TMEM120B	TRUE	TRUE				LFNG	TRUE	TRUE	GPSM1	FALSE	TRUE
POLE	FALSE	TRUE				GNA12	TRUE	TRUE	DVL1	FALSE	TRUE
GLRX5	TRUE	TRUE				CLIP2	FALSE	TRUE	ATAD3B	FALSE	FALSE
CDCA4	TRUE	TRUE				LONRF1	TRUE	TRUE	TMEM201	TRUE	FALSE
JAG2	TRUE	TRUE				ATP6V1C1	TRUE	TRUE	DDIT4	TRUE	TRUE
CHAC1	FALSE	TRUE				ADGRB1	FALSE	FALSE	IFITM1_IFITM2	TRUE	TRUE
C16orf13	FALSE	FALSE				RHPN1	TRUE	TRUE	SSH3_ANKRD13D	TRUE	TRUE
RHOT2_WDR90	FALSE	TRUE				RXRA	TRUE	TRUE	LTBR	FALSE	FALSE
METRN	FALSE	TRUE				COL5A1	TRUE	TRUE	NOC4L	FALSE	FALSE
ZNF764_AC002310.13	TRUE	TRUE				GPSM1	FALSE	TRUE	ANKRD9	FALSE	TRUE
SLC7A5	TRUE	TRUE				DVL1	FALSE	TRUE	WDR24_JMJD8	FALSE	FALSE
CDT1	TRUE	TRUE				ATAD3B	FALSE	FALSE	ATP6V0D1	FALSE	TRUE
GSG2	TRUE	TRUE				TMEM201	TRUE	FALSE	P2RX5_P2RX5-TAX1BP3_TAX1BP3	FALSE	TRUE
AURKB	TRUE	TRUE				CNR2	TRUE	TRUE	HEXIM1	TRUE	TRUE
PFAS	TRUE	TRUE				DDIT4	TRUE	TRUE	MRPL12_RP13-1032I1.10_SLC25A10	FALSE	TRUE
TOM1L2	TRUE	TRUE				IFITM1_IFITM2	TRUE	TRUE	NARF	TRUE	TRUE
MRPL38_RP11-552F3.12	FALSE	TRUE				SSH3_ANKRD13D	TRUE	TRUE	BSG	FALSE	TRUE
POLRMT	FALSE	FALSE				LTBR	FALSE	FALSE	RPS15	FALSE	TRUE
PALM	FALSE	TRUE				NOC4L	FALSE	FALSE	LSM7	TRUE	TRUE
ARID3A	TRUE	TRUE				ANKRD9	FALSE	TRUE	SMIM24	FALSE	FALSE
PCSK4	FALSE	FALSE				LRRC28	TRUE	TRUE	SEMA6B	FALSE	TRUE
MEX3D	FALSE	FALSE				WDR24_JMJD8	FALSE	FALSE	DNMT1_S1PR2	TRUE	TRUE
LMNB2	TRUE	TRUE				HCFC1R1	FALSE	FALSE	RASAL3	FALSE	FALSE
NCLN	TRUE	TRUE				ATP6V0D1	FALSE	TRUE	GTPBP3	FALSE	FALSE
ARHGEF18_CTB-133G6.1	TRUE	TRUE				P2RX5_P2RX5-TAX1BP3_TAX1BP3	FALSE	TRUE	LRRC25	FALSE	TRUE
MRPL4	FALSE	FALSE				HEXIM1	TRUE	TRUE	LILRA5	FALSE	FALSE
JUNB	TRUE	TRUE				MRPL12_RP13-1032I1.10_SLC25A10	FALSE	TRUE	SLC2A4RG	FALSE	TRUE
JAK3	FALSE	TRUE				NARF	TRUE	TRUE	ZNF512B	TRUE	FALSE
RASIP1	FALSE	FALSE				BSG	FALSE	TRUE	PTTG1IP	TRUE	TRUE
TRIM28	FALSE	TRUE				RPS15	FALSE	TRUE	ITGB2	TRUE	TRUE
TCFL5	TRUE	TRUE				LSM7	TRUE	TRUE	MYH9	TRUE	TRUE
ADARB1	TRUE	TRUE				SMIM24	FALSE	FALSE	CHST12	FALSE	FALSE
IL17RA	TRUE	TRUE				SEMA6B	FALSE	TRUE	TNRC18	TRUE	TRUE
LGALS1	FALSE	FALSE				DNMT1_S1PR2	TRUE	TRUE	GRID2IP	FALSE	FALSE
TSPO	FALSE	TRUE				GTPBP3	FALSE	FALSE	AGO2	TRUE	TRUE
LST1	TRUE	TRUE				LRRC25	FALSE	TRUE	LY6E	TRUE	TRUE
LFNG	TRUE	TRUE				NLRP12	FALSE	FALSE	ZNF696	TRUE	TRUE
GNA12	TRUE	TRUE				LILRA5	FALSE	FALSE	PLEC	TRUE	TRUE
CLIP2	FALSE	TRUE				RBM38	TRUE	TRUE	CPSF1_SLC39A4	FALSE	TRUE
LONRF1	TRUE	TRUE				SLC2A4RG	FALSE	TRUE	QSOX2	TRUE	TRUE
ADGRB1	FALSE	FALSE				ZNF512B	TRUE	FALSE	DPP7	FALSE	FALSE
RHPN1	TRUE	TRUE				PTTG1IP	TRUE	TRUE	TUBB4B	FALSE	TRUE
SPIN1	FALSE	FALSE				ITGB2	TRUE	TRUE	SUM	74	113
RXRA	TRUE	TRUE				MYH9	TRUE	TRUE
COL5A1	TRUE	TRUE				FAM20C	TRUE	TRUE
GPSM1	FALSE	TRUE				CHST12	FALSE	FALSE
DVL1	FALSE	TRUE				CARD11	TRUE	TRUE
ATAD3B	FALSE	FALSE				TNRC18	TRUE	TRUE
TMEM201	TRUE	TRUE				GRID2IP	FALSE	FALSE
DDIT4	TRUE	TRUE				KLF10	TRUE	TRUE
IFITM1_IFITM2	TRUE	TRUE				AGO2	TRUE	TRUE
SSH3_ANKRD13D	TRUE	TRUE				LY6E	TRUE	TRUE
LTBR	FALSE	FALSE				ZNF696	TRUE	TRUE
NOC4L	FALSE	FALSE				PLEC	TRUE	TRUE
ANKRD9	FALSE	TRUE				CPSF1_SLC39A4	FALSE	TRUE
TDRD9	FALSE	FALSE				IER5L	FALSE	TRUE
PLD4	TRUE	TRUE				QSOX2	TRUE	TRUE
LRRC28	TRUE	TRUE				DPP7	FALSE	FALSE
WDR24_JMJD8	FALSE	FALSE				TUBB4B	FALSE	FALSE
HCFC1R1	FALSE	FALSE				SUM	89	129
ATP6V0D1	FALSE	TRUE
P2RX5_P2RX5-TAX1BP3_TAX1BP3	FALSE	TRUE
HEXIM1	TRUE	TRUE
MRPL12_RP13-1032I1.10_SLC25A10	FALSE	TRUE
NARF	TRUE	TRUE
BSG	FALSE	TRUE
RPS15	FALSE	TRUE
LSM7	TRUE	TRUE
SMIM24	FALSE	FALSE
SEMA6B	FALSE	TRUE
RPS28	FALSE	FALSE
DNMT1_S1PR2	TRUE	TRUE
GTPBP3	FALSE	FALSE
LILRA5	FALSE	FALSE
SLC27A5	FALSE	TRUE
SLCO4A1	TRUE	TRUE
SLC2A4RG	FALSE	TRUE
ZNF512B	TRUE	FALSE
PTTG1IP	TRUE	TRUE
ITGB2	TRUE	TRUE
MYH9	TRUE	TRUE
IRF1	TRUE	TRUE
DUSP1	TRUE	TRUE
BTNL8	FALSE	FALSE
CHST12	FALSE	FALSE
CARD11	TRUE	TRUE
TNRC18	TRUE	TRUE
GRID2IP	FALSE	FALSE
MYC	TRUE	TRUE
AGO2	TRUE	TRUE
LY6E	TRUE	TRUE
ZNF696	TRUE	TRUE
PLEC	TRUE	TRUE
CPSF1_SLC39A4	FALSE	TRUE
DAPK1	TRUE	TRUE
IER5L	FALSE	TRUE
QSOX2	TRUE	TRUE
TUBB4B	FALSE	TRUE
SUM	105	162

## Sheet: CEBPa
C0	dbSUPER_blood	dbSUPER_all	C12	dbSUPER_blood	dbSUPER_all	C24	dbSUPER_blood	dbSUPER_all	C96	dbSUPER_blood	dbSUPER_all
BTG2	TRUE	TRUE	ARHGEF10L	TRUE	TRUE	ARHGEF10L	TRUE	TRUE	MRPL33	FALSE	TRUE
USP3	TRUE	TRUE	SLC9A1	TRUE	TRUE	SLC9A1	TRUE	TRUE	FBXL5	TRUE	TRUE
BCL2	TRUE	TRUE	IGSF3	TRUE	TRUE	PTPRE	TRUE	TRUE	S100A8	FALSE	FALSE
PARD6B	TRUE	TRUE	BTG2	TRUE	TRUE	PRKCH_RP11-47I22.4	TRUE	TRUE	KCNK10	TRUE	TRUE
CCR1	TRUE	TRUE	HLX	TRUE	TRUE	RIN3	TRUE	TRUE	MYADM	TRUE	TRUE
ROBO2	TRUE	TRUE	PTPRE	TRUE	TRUE	RP11-403P17.5	FALSE	FALSE	CCR1	TRUE	TRUE
FAM86B1	FALSE	FALSE	POLA2	FALSE	TRUE	TK2	TRUE	TRUE	ROBO2	TRUE	TRUE
LONRF1	TRUE	TRUE	PRKCH_RP11-47I22.4	TRUE	TRUE	IRF8	TRUE	TRUE	CD14	FALSE	FALSE
ATP6V1C1	TRUE	TRUE	RIN3	TRUE	TRUE	RAB3D_TMEM205	FALSE	FALSE	FAM86B1	FALSE	FALSE
ZHX2	TRUE	TRUE	PSTPIP1	TRUE	TRUE	LAIR1	TRUE	TRUE	LONRF1	TRUE	TRUE
TRIB1	TRUE	TRUE	RP11-403P17.5	FALSE	FALSE	IL1B	TRUE	TRUE	ZHX2	TRUE	TRUE
ATP6V0D1	FALSE	TRUE	TK2	TRUE	TRUE	HIP1	TRUE	TRUE	S100A12	TRUE	TRUE
PHLPP1	TRUE	TRUE	IRF8	TRUE	TRUE	CTSB	TRUE	TRUE	NLRP12	FALSE	FALSE
CTSB	TRUE	TRUE	LAIR1	TRUE	TRUE	ENTPD4_LOXL2	FALSE	TRUE	IFNAR1	TRUE	TRUE
KLF10	TRUE	TRUE	IL1B	TRUE	TRUE	CPQ	FALSE	TRUE	APBB3_SRA1	FALSE	FALSE
SNTB1	TRUE	TRUE	TRIOBP	FALSE	TRUE	S100A8	FALSE	FALSE	CTSB	TRUE	TRUE
MTSS1	TRUE	TRUE	CTSB	TRUE	TRUE	GPR137B	TRUE	TRUE	MTUS1	FALSE	TRUE
ZNF462	FALSE	TRUE	ENTPD4_LOXL2	FALSE	TRUE	SRGN	TRUE	TRUE	SNTB1	TRUE	TRUE
SUM	15	17	CPQ	FALSE	TRUE	DUSP6	TRUE	TRUE	MTSS1	TRUE	TRUE
			S100A8	FALSE	FALSE	SCARB1	TRUE	TRUE	SUM	12	14
			GPR137B	TRUE	TRUE	USP3	TRUE	TRUE
			SCARB1	TRUE	TRUE	SMAD3	TRUE	TRUE
			USP3	TRUE	TRUE	MYADM	TRUE	TRUE
			CCL3	TRUE	TRUE	TTYH1	TRUE	TRUE
			MYADM	TRUE	TRUE	PSD4	TRUE	TRUE
			TTYH1	TRUE	TRUE	PMEPA1	TRUE	TRUE
			PSD4	TRUE	TRUE	CCR1	TRUE	TRUE
			PMEPA1	TRUE	TRUE	ROBO2	TRUE	TRUE
			ROBO2	TRUE	TRUE	BMP2K	TRUE	TRUE
			PTX3	TRUE	TRUE	CD14	FALSE	FALSE
			FAM86B1	FALSE	FALSE	FAM86B1	FALSE	FALSE
			LONRF1	TRUE	TRUE	LONRF1	TRUE	TRUE
			ASPH_AC090094.1	TRUE	TRUE	ZHX2	TRUE	TRUE
			ZHX2	TRUE	TRUE	TRIB1	TRUE	TRUE
			TRIB1	TRUE	TRUE	PHF20L1	TRUE	TRUE
			S100A12	TRUE	TRUE	S100A12	TRUE	TRUE
			MARK1	FALSE	FALSE	LYST	TRUE	TRUE
			LYST	TRUE	TRUE	SMAD6	TRUE	TRUE
			DDIT4	TRUE	TRUE	ATP6V0D1	FALSE	TRUE
			ATP6V0D1	FALSE	TRUE	NLRP12	FALSE	FALSE
			CCL5	TRUE	TRUE	RBM38	TRUE	TRUE
			NLRP12	FALSE	FALSE	IFNAR1	TRUE	TRUE
			RBM38	TRUE	TRUE	ACSL1	FALSE	TRUE
			IFNAR1	TRUE	TRUE	APBB3_SRA1	FALSE	FALSE
			OSM	TRUE	TRUE	SNTB1	TRUE	TRUE
			CCNL1	TRUE	TRUE	TMEM71	TRUE	TRUE
			ACSL1	FALSE	TRUE	SUM	35	39
			CHD7	TRUE	TRUE
			SNTB1	TRUE	TRUE
			MYC	TRUE	TRUE
			SUM	39	45

## Sheet: H3K27Ac
0	dbSUPER_blood	dbSUPER_all	24	dbSUPER_blood	dbSUPER_all	72	dbSUPER_blood	dbSUPER_all
AGTRAP	TRUE	TRUE	AGTRAP	TRUE	TRUE	TNFRSF1B	TRUE	TRUE
E2F2	TRUE	TRUE	TNFRSF1B	TRUE	TRUE	ARHGEF10L	TRUE	TRUE
ID3	TRUE	TRUE	ARHGEF10L	TRUE	TRUE	E2F2	TRUE	TRUE
HIVEP3	TRUE	TRUE	E2F2	TRUE	TRUE	ID3	TRUE	TRUE
INTS3	FALSE	TRUE	ID3	TRUE	TRUE	SMAP2	TRUE	TRUE
ZBTB7B	TRUE	TRUE	SLC9A1	TRUE	TRUE	HIVEP3	TRUE	TRUE
SLAMF1	TRUE	TRUE	CAP1	TRUE	TRUE	ZBTB7B	TRUE	TRUE
RCSD1	TRUE	TRUE	HIVEP3	TRUE	TRUE	RCSD1	TRUE	TRUE
RGL1	FALSE	TRUE	INTS3	FALSE	TRUE	RGL1	FALSE	TRUE
NAV1	FALSE	TRUE	IL6R	TRUE	TRUE	BTG2	TRUE	TRUE
LGR6	FALSE	TRUE	ZBTB7B	TRUE	TRUE	HLX	TRUE	TRUE
BTG2	TRUE	TRUE	RCSD1	TRUE	TRUE	LYST	TRUE	TRUE
DYRK3	TRUE	TRUE	RGL1	FALSE	TRUE	SDCCAG8	TRUE	TRUE
GALNT2	TRUE	TRUE	BTG2	TRUE	TRUE	BMI1_COMMD3_COMMD3-BMI1	TRUE	TRUE
BMI1_COMMD3_COMMD3-BMI1	TRUE	TRUE	HLX	TRUE	TRUE	SPAG6	TRUE	TRUE
SPAG6	TRUE	TRUE	LYST	TRUE	TRUE	RASSF4	TRUE	TRUE
BLNK	TRUE	TRUE	SDCCAG8	TRUE	TRUE	ARID5B	TRUE	TRUE
DNTT	TRUE	TRUE	NLRP3	TRUE	TRUE	PIK3AP1	TRUE	TRUE
PIK3AP1	TRUE	TRUE	SFMBT2	TRUE	TRUE	PTPRE	TRUE	TRUE
PTPRE	TRUE	TRUE	BMI1_COMMD3_COMMD3-BMI1	TRUE	TRUE	RHOG	TRUE	TRUE
SLC25A22	FALSE	TRUE	SPAG6	TRUE	TRUE	MRVI1_	TRUE	TRUE
SPI1	TRUE	TRUE	RASSF4	TRUE	TRUE	LMO2	TRUE	TRUE
PPP1CA	TRUE	TRUE	ARID5B	TRUE	TRUE	SPI1	TRUE	TRUE
ALDH3B1	TRUE	TRUE	TSPAN15	FALSE	FALSE	ATG16L2	TRUE	TRUE
BCL9L	TRUE	TRUE	PLAU	FALSE	FALSE	NARS2	TRUE	TRUE
UBASH3B	TRUE	TRUE	BLNK	TRUE	TRUE	MAML2	TRUE	TRUE
CACNA2D4	FALSE	TRUE	DNTT	TRUE	TRUE	BCL9L	TRUE	TRUE
TNFRSF1A	TRUE	TRUE	PIK3AP1	TRUE	TRUE	UBASH3B	TRUE	TRUE
LPAR5	TRUE	TRUE	RRP12	TRUE	TRUE	CACNA2D4	FALSE	TRUE
ENO2	FALSE	TRUE	PTPRE	TRUE	TRUE	TNFRSF1A	TRUE	TRUE
ATN1	FALSE	TRUE	INPP5A	TRUE	TRUE	ENO2	FALSE	TRUE
PTPN6	TRUE	TRUE	SLC25A22	FALSE	TRUE	ATN1	FALSE	TRUE
LRMP	TRUE	TRUE	RHOG	TRUE	TRUE	PTPN6	TRUE	TRUE
MDM2	TRUE	TRUE	MRVI1_	TRUE	TRUE	DIP2B	TRUE	TRUE
ELK3	TRUE	TRUE	SPI1	TRUE	TRUE	RASSF3	TRUE	TRUE
SH2B3	TRUE	TRUE	PPP1CA	TRUE	TRUE	DUSP6	TRUE	TRUE
TMEM120B	TRUE	TRUE	ALDH3B1	TRUE	TRUE	SH2B3	TRUE	TRUE
WDR66	TRUE	TRUE	ATG16L2	TRUE	TRUE	DHX37	TRUE	TRUE
BCL7A	TRUE	TRUE	NARS2	TRUE	TRUE	ALOX5AP	TRUE	TRUE
SCARB1	TRUE	TRUE	MAML2	TRUE	TRUE	LCP1	TRUE	TRUE
DHX37	TRUE	TRUE	BCL9L	TRUE	TRUE	RCBTB2	TRUE	TRUE
ADGRD1	FALSE	FALSE	UBASH3B	TRUE	TRUE	KCTD12	FALSE	FALSE
DCUN1D2	FALSE	TRUE	CACNA2D4	FALSE	TRUE	ABC13-47488600E17.1_RASA3	TRUE	TRUE
ABC13-47488600E17.1_RASA3	TRUE	TRUE	TNFRSF1A	TRUE	TRUE	PRKCH_RP11-47I22.4	TRUE	TRUE
KIAA0391_PSMA6_RP11-561B11.2	FALSE	TRUE	ENO2	FALSE	TRUE	RIN3	TRUE	TRUE
SYNE3	TRUE	TRUE	ATN1	FALSE	TRUE	SYNE3	TRUE	TRUE
SLC25A29	TRUE	TRUE	PTPN6	TRUE	TRUE	PPP2R5C	TRUE	TRUE
PPP2R5C	TRUE	TRUE	ETV6	TRUE	TRUE	KIAA0430	TRUE	TRUE
TMEM121	TRUE	TRUE	DIP2B	TRUE	TRUE	METTL9	TRUE	TRUE
SEMA4B	TRUE	TRUE	ITGB7	TRUE	TRUE	RP11-403P17.5	FALSE	FALSE
XYLT1	TRUE	TRUE	RASSF3	TRUE	TRUE	TK2	TRUE	TRUE
ZNF423	TRUE	TRUE	DUSP6	TRUE	TRUE	CMTM1_CKLF	TRUE	TRUE
RP11-403P17.5	FALSE	FALSE	ELK3	TRUE	TRUE	CMIP	TRUE	TRUE
TK2	TRUE	TRUE	SH2B3	TRUE	TRUE	IRF8	TRUE	TRUE
CMTM1_CKLF	TRUE	TRUE	TMEM120B	TRUE	TRUE	SLC43A2	TRUE	TRUE
ZNRF1	TRUE	TRUE	DHX37	TRUE	TRUE	GAS7	TRUE	TRUE
CMIP	TRUE	TRUE	ALOX5AP	TRUE	TRUE	ADAP2	TRUE	TRUE
GSE1	TRUE	TRUE	LCP1	TRUE	TRUE	RNF135	TRUE	TRUE
IRF8	TRUE	TRUE	RCBTB2	TRUE	TRUE	RARA	TRUE	TRUE
KLHDC4	TRUE	TRUE	RAB20	FALSE	FALSE	UBTF	TRUE	TRUE
NXN	FALSE	TRUE	ABC13-47488600E17.1_RASA3	TRUE	TRUE	PLCD3	TRUE	TRUE
SLC43A2	TRUE	TRUE	PRKCH_RP11-47I22.4	TRUE	TRUE	FMNL1	TRUE	TRUE
GAS7	TRUE	TRUE	RIN3	TRUE	TRUE	TSPOAP1	FALSE	FALSE
MYO18A	TRUE	TRUE	SYNE3	TRUE	TRUE	CLTC_VMP1	FALSE	FALSE
RARA	TRUE	TRUE	PPP2R5C	TRUE	TRUE	RHBDF2	TRUE	TRUE
HDAC5	FALSE	TRUE	PSTPIP1	TRUE	TRUE	MXRA7	FALSE	FALSE
UBTF	TRUE	TRUE	KIAA0430	TRUE	TRUE	PGS1	TRUE	TRUE
PLCD3	TRUE	TRUE	XYLT1	TRUE	TRUE	CYTH1	TRUE	TRUE
FMNL1	TRUE	TRUE	METTL9	TRUE	TRUE	MBP	TRUE	TRUE
MSI2	TRUE	TRUE	NLRC5	TRUE	TRUE	ARHGAP45	FALSE	FALSE
CCDC182	TRUE	TRUE	ADGRG3	FALSE	FALSE	GNG7	TRUE	TRUE
TSPOAP1	FALSE	FALSE	RP11-403P17.5	FALSE	FALSE	MYO1F	FALSE	FALSE
ICAM2	TRUE	TRUE	TK2	TRUE	TRUE	HSH2D	TRUE	TRUE
CASKIN2	FALSE	TRUE	CMTM1_CKLF	TRUE	TRUE	SLC27A1	FALSE	TRUE
TSEN54	FALSE	FALSE	ZNRF1	TRUE	TRUE	FAM129C	FALSE	TRUE
RHBDF2	TRUE	TRUE	CMIP	TRUE	TRUE	ELL	TRUE	TRUE
MXRA7	FALSE	TRUE	IRF8	TRUE	TRUE	CEACAM21	TRUE	TRUE
2021-09-09	TRUE	TRUE	KLHDC4	TRUE	TRUE	VASP	TRUE	TRUE
CYTH1	TRUE	TRUE	NXN	FALSE	FALSE	RPS11	TRUE	TRUE
BAHCC1	FALSE	TRUE	SLC43A2	TRUE	TRUE	FCGRT	TRUE	TRUE
TBCD	FALSE	TRUE	GAS7	TRUE	TRUE	SIGLEC9	TRUE	TRUE
MTCL1	FALSE	FALSE	MYO18A	TRUE	TRUE	LAIR1	TRUE	TRUE
LDLRAD4	TRUE	TRUE	RARA	TRUE	TRUE	MZF1	TRUE	TRUE
ARHGAP45	FALSE	FALSE	HDAC5	FALSE	TRUE	ADAM17	TRUE	TRUE
TCF3	TRUE	TRUE	UBTF	TRUE	TRUE	FOSL2	TRUE	TRUE
GNG7	TRUE	TRUE	PLCD3	TRUE	TRUE	ZFP36L2	TRUE	TRUE
UHRF1	FALSE	TRUE	FMNL1	TRUE	TRUE	ARHGAP25	TRUE	TRUE
HSH2D	TRUE	TRUE	FAM117A	FALSE	FALSE	SH3RF3	TRUE	TRUE
ANKLE1	FALSE	FALSE	MSI2	TRUE	TRUE	IL1B	TRUE	TRUE
SLC27A1	FALSE	TRUE	TSPOAP1	FALSE	FALSE	HNMT	FALSE	FALSE
FAM129C	FALSE	TRUE	RHBDF2	TRUE	TRUE	FMNL2	FALSE	FALSE
ELL	TRUE	TRUE	MXRA7	FALSE	FALSE	DHRS9	TRUE	TRUE
CEACAM21	TRUE	TRUE	2021-09-09	TRUE	TRUE	DOCK10	TRUE	TRUE
VASP	TRUE	TRUE	PGS1	TRUE	TRUE	PTMA	TRUE	TRUE
RPS11	TRUE	TRUE	CYTH1	TRUE	TRUE	HCK	TRUE	TRUE
FCGRT	TRUE	TRUE	BAHCC1	FALSE	TRUE	PREX1	TRUE	TRUE
LAIR1	TRUE	TRUE	TBCD	FALSE	TRUE	TPD52L2	FALSE	FALSE
TTYH1	TRUE	TRUE	LPIN2	TRUE	TRUE	IFNAR1	TRUE	TRUE
MZF1	TRUE	TRUE	MBP	TRUE	TRUE	UPB1	TRUE	TRUE
PXDN	TRUE	TRUE	ARHGAP45	FALSE	FALSE	ARL8B_EDEM1	TRUE	TRUE
SMC6	TRUE	TRUE	GNG7	TRUE	TRUE	IRAK2	TRUE	TRUE
MSGN1	TRUE	TRUE	PRAM1	FALSE	FALSE	TGFBR2	TRUE	TRUE
FOSL2	TRUE	TRUE	MYO1F	FALSE	FALSE	NISCH_STAB1	FALSE	TRUE
ZFP36L2	TRUE	TRUE	RAB3D_TMEM205	FALSE	FALSE	NFKBIZ	TRUE	TRUE
TTC7A	TRUE	TRUE	CCDC159	FALSE	FALSE	BCL6	TRUE	TRUE
MSH6	TRUE	TRUE	HSH2D	TRUE	TRUE	FBXL5	TRUE	TRUE
BCL11A	TRUE	TRUE	ANKLE1	FALSE	FALSE	RBM47	TRUE	TRUE
ARHGAP25	TRUE	TRUE	SLC27A1	FALSE	TRUE	TET2	TRUE	TRUE
SH3RF3	TRUE	TRUE	FAM129C	FALSE	TRUE	C5orf56	FALSE	FALSE
IL1B	TRUE	TRUE	ELL	TRUE	TRUE	CD14	FALSE	FALSE
BIN1	TRUE	TRUE	CEACAM21	TRUE	TRUE	__PCDHGA1_PCDHGA10_PCDHGA11_PCDHGA12_PCDHGA2_PCDHGA3_PCDHGA5_PCDHGA6_PCDHGA7_PCDHGA8_PCDHGB1_PCDHGB2_PCDHGB3_PCDHGB4_PCDHGB6_PCDHGB7_PCDHGC3_PCDHGC5	FALSE	FALSE
MGAT5	TRUE	TRUE	VASP	TRUE	TRUE	ARHGAP26	TRUE	TRUE
STK39	TRUE	TRUE	RPS11	TRUE	TRUE	ERGIC1	TRUE	TRUE
PTMA	TRUE	TRUE	FCGRT	TRUE	TRUE	DBN1	FALSE	FALSE
PREX1	TRUE	TRUE	SIGLEC9	TRUE	TRUE	DOK3_DDX41	TRUE	TRUE
BCAS4	TRUE	TRUE	LAIR1	TRUE	TRUE	FAM65B	TRUE	TRUE
PHACTR3	FALSE	FALSE	MZF1	TRUE	TRUE	TUBB	TRUE	TRUE
STMN3	TRUE	TRUE	ADAM17	TRUE	TRUE	PIM1	TRUE	TRUE
TPD52L2	FALSE	FALSE	SMC6	TRUE	TRUE	TAGAP	TRUE	TRUE
ABCG1	TRUE	TRUE	MSGN1	TRUE	TRUE	SOD2	TRUE	TRUE
RTN4R	FALSE	FALSE	FOSL2	TRUE	TRUE	C7orf50	TRUE	TRUE
VPREB1	TRUE	TRUE	ZFP36L2	TRUE	TRUE	EEPD1	TRUE	TRUE
IGLL5	TRUE	TRUE	TTC7A	TRUE	TRUE	RFC2	TRUE	TRUE
ZNF70	FALSE	FALSE	MSH6	TRUE	TRUE	DOCK4	TRUE	TRUE
HPS4	TRUE	TRUE	BCL11A	TRUE	TRUE	CTSB	TRUE	TRUE
TFIP11	TRUE	FALSE	ARHGAP25	TRUE	TRUE	PPP3CC	TRUE	TRUE
PDXP_SH3BP1	TRUE	TRUE	SH3RF3	TRUE	TRUE	CPQ	FALSE	FALSE
TRIOBP	FALSE	FALSE	IL1B	TRUE	TRUE	DENND3	TRUE	TRUE
MCAT	FALSE	FALSE	FMNL2	FALSE	FALSE	AKNA	TRUE	TRUE
HDAC10_MAPK12	FALSE	FALSE	DHRS9	TRUE	TRUE	NACC2	TRUE	TRUE
ARL8B_EDEM1	TRUE	TRUE	PTMA	TRUE	TRUE	EGFL7	TRUE	TRUE
IRAK2	TRUE	TRUE	HCK	TRUE	TRUE	FAM69B	TRUE	TRUE
ATP2B2	TRUE	TRUE	PREX1	TRUE	TRUE	CYBB_	TRUE	TRUE
TGFBR2	TRUE	TRUE	BCAS4	TRUE	TRUE	BCOR	TRUE	TRUE
PXK	TRUE	TRUE	TPD52L2	FALSE	FALSE	PNRC2	TRUE	TRUE
BCL6	TRUE	TRUE	IFNAR1	TRUE	TRUE	THEMIS2	TRUE	TRUE
SH3BP2	TRUE	TRUE	ZNF70	FALSE	FALSE	PTAFR	TRUE	TRUE
GAB1	TRUE	TRUE	UPB1	TRUE	TRUE	S100A8	FALSE	FALSE
KIAA0922	TRUE	TRUE	HPS4	TRUE	TRUE	GPR137B	TRUE	TRUE
LRRC14B	FALSE	FALSE	TFIP11	TRUE	TRUE	APBB1IP	TRUE	TRUE
IL7R	TRUE	TRUE	PDXP_SH3BP1	TRUE	TRUE	SRGN	TRUE	TRUE
C5orf56	FALSE	FALSE	TRIOBP	FALSE	FALSE	C10orf54	TRUE	TRUE
C5orf15_VDAC1	TRUE	TRUE	HDAC10_MAPK12	FALSE	FALSE	PSAP	TRUE	TRUE
__PCDHGA1_PCDHGA10_PCDHGA11_PCDHGA12_PCDHGA2_PCDHGA3_PCDHGA5_PCDHGA6_PCDHGA7_PCDHGA8_PCDHGB1_PCDHGB2_PCDHGB3_PCDHGB4_PCDHGB6_PCDHGB7_PCDHGC3_PCDHGC5	FALSE	FALSE	ARL8B_EDEM1	TRUE	TRUE	ATHL1	FALSE	FALSE
CD74	TRUE	TRUE	IRAK2	TRUE	TRUE	B4GALNT4	TRUE	TRUE
EBF1	TRUE	TRUE	TGFBR2	TRUE	TRUE	CD44	TRUE	TRUE
ERGIC1	TRUE	TRUE	NISCH_STAB1	FALSE	TRUE	FTH1	TRUE	TRUE
DBN1	FALSE	FALSE	PRKCD	TRUE	TRUE	LTBR	FALSE	FALSE
DOK3_DDX41	TRUE	TRUE	PXK	TRUE	TRUE	PHB2	TRUE	TRUE
N4BP3	TRUE	TRUE	BCL6	TRUE	TRUE	LRP1	FALSE	FALSE
TUBB	TRUE	TRUE	SH3BP2	TRUE	TRUE	SCARB1	TRUE	TRUE
TFEB	TRUE	TRUE	FBXL5	TRUE	TRUE	CCNA1	TRUE	TRUE
CCND3	TRUE	TRUE	GAB1	TRUE	TRUE	ARF6	TRUE	TRUE
HIVEP2	TRUE	TRUE	IL7R	TRUE	TRUE	FOS	TRUE	TRUE
C7orf50	TRUE	TRUE	C5orf56	FALSE	FALSE	IRF2BPL	TRUE	TRUE
INTS1	TRUE	TRUE	CD14	FALSE	FALSE	GLRX5	TRUE	TRUE
RFC2	TRUE	TRUE	__PCDHGA1_PCDHGA10_PCDHGA11_PCDHGA12_PCDHGA2_PCDHGA3_PCDHGA5_PCDHGA6_PCDHGA7_PCDHGA8_PCDHGB1_PCDHGB2_PCDHGB3_PCDHGB4_PCDHGB6_PCDHGB7_PCDHGC3_PCDHGC5	FALSE	FALSE	SPRED1	TRUE	TRUE
ARHGEF10_KBTBD11-OT1	FALSE	TRUE	ARHGAP26	TRUE	TRUE	BMF	TRUE	TRUE
KBTBD11	FALSE	FALSE	LCP2	TRUE	TRUE	USP3	TRUE	TRUE
BLK	TRUE	TRUE	ERGIC1	TRUE	TRUE	AC069368.3_PLEKHO2	TRUE	TRUE
PPP3CC	TRUE	TRUE	DBN1	FALSE	FALSE	FURIN_FES	TRUE	TRUE
CPA6	TRUE	TRUE	DOK3_DDX41	TRUE	TRUE	TBC1D24	TRUE	TRUE
ZHX2	TRUE	TRUE	FAM65B	TRUE	TRUE	CMTM3	FALSE	FALSE
ASAP1	TRUE	TRUE	TUBB	TRUE	TRUE	AURKB	TRUE	TRUE
DENND3	TRUE	TRUE	PIM1	TRUE	TRUE	PFAS	TRUE	TRUE
GSDMD	FALSE	FALSE	TFEB	TRUE	TRUE	CCL4L2	TRUE	TRUE
ZCCHC7	TRUE	TRUE	CCND3	TRUE	TRUE	CD300LF	FALSE	FALSE
AKNA	TRUE	TRUE	TAGAP	TRUE	TRUE	MRPL38_RP11-552F3.12	FALSE	TRUE
CDK9_FPGS	FALSE	TRUE	C7orf50	TRUE	TRUE	NCLN	TRUE	TRUE
EGFL7	TRUE	TRUE	INTS1	TRUE	TRUE	CTD-3214H19.16_MCEMP1	FALSE	FALSE
FAM69B	TRUE	TRUE	EEPD1	TRUE	TRUE	JUNB	TRUE	TRUE
ANAPC2	FALSE	FALSE	RFC2	TRUE	TRUE	SERTAD1	TRUE	TRUE
CYBB_	TRUE	TRUE	HIP1	TRUE	TRUE	BCL3	TRUE	TRUE
BCOR	TRUE	TRUE	ARHGEF10_KBTBD11-OT1	FALSE	TRUE	RPL18_FAM83E	FALSE	TRUE
SASH3	TRUE	TRUE	KBTBD11	FALSE	FALSE	RASIP1	FALSE	FALSE
ARHGAP4_NAA10	FALSE	TRUE	CTSB	TRUE	TRUE	MYADM	TRUE	TRUE
AURKAIP1	FALSE	FALSE	PPP3CC	TRUE	TRUE	LILRA5	FALSE	FALSE
PRKCZ	TRUE	TRUE	ENTPD4_LOXL2	FALSE	TRUE	TTYH1	TRUE	TRUE
PNRC2	TRUE	TRUE	CPQ	FALSE	FALSE	TRIM28	FALSE	FALSE
IQGAP3	FALSE	FALSE	SNTB1	TRUE	TRUE	ID2	TRUE	TRUE
CD48	TRUE	TRUE	ASAP1	TRUE	TRUE	PSD4	TRUE	TRUE
APBB1IP	TRUE	TRUE	DENND3	TRUE	TRUE	ACVR2A	FALSE	FALSE
PWWP2B	TRUE	TRUE	ZCCHC7	TRUE	TRUE	CCDC150	FALSE	FALSE
ATHL1	FALSE	FALSE	SNX30	TRUE	TRUE	MREG_PECR	TRUE	TRUE
B4GALNT4	TRUE	TRUE	AKNA	TRUE	TRUE	SLC11A1	TRUE	TRUE
LRP5	TRUE	TRUE	CDK9_FPGS	FALSE	TRUE	SIRPA	TRUE	TRUE
ETS1	TRUE	TRUE	NACC2	TRUE	TRUE	PMEPA1	TRUE	TRUE
LTBR	FALSE	FALSE	EGFL7	TRUE	TRUE	SLCO4A1	TRUE	TRUE
PHB2	TRUE	TRUE	FAM69B	TRUE	TRUE	BACH1	TRUE	TRUE
LRP1	FALSE	FALSE	ANAPC2	FALSE	FALSE	IFNAR2_IL10RB	TRUE	TRUE
GLT1D1	TRUE	TRUE	CYBB_	TRUE	TRUE	CX3CR1	TRUE	TRUE
HMGB1	TRUE	TRUE	BCOR	TRUE	TRUE	CCR1	TRUE	TRUE
RNASEH2B	TRUE	TRUE	SASH3	TRUE	TRUE	ALCAM	TRUE	TRUE
FOS	TRUE	TRUE	PNRC2	TRUE	TRUE	PTX3	TRUE	TRUE
GLRX5	TRUE	TRUE	THEMIS2	TRUE	TRUE	ZMAT3	FALSE	FALSE
TCL1A	TRUE	TRUE	CSF1	TRUE	TRUE	IL1RAP	TRUE	TRUE
JAG2	TRUE	TRUE	S100A8	FALSE	FALSE	NRROS_PIGX	TRUE	TRUE
KLF13	TRUE	TRUE	IQGAP3	FALSE	FALSE	RBPJ	TRUE	TRUE
BMF	TRUE	TRUE	ENAH	TRUE	TRUE	RELL1	TRUE	FALSE
CHAC1	FALSE	FALSE	GPR137B	TRUE	TRUE	BMP2K	TRUE	TRUE
USP3	TRUE	TRUE	APBB1IP	TRUE	TRUE	PTGER4	TRUE	TRUE
AC069368.3_PLEKHO2	TRUE	TRUE	SRGN	TRUE	TRUE	MAP3K1	TRUE	TRUE
IGF1R	TRUE	TRUE	C10orf54	TRUE	TRUE	ELL2	FALSE	FALSE
CHSY1	TRUE	TRUE	PSAP	TRUE	TRUE	ADRB2	TRUE	TRUE
TBC1D24	TRUE	FALSE	PDCD4	TRUE	TRUE	RBM24	FALSE	FALSE
NLRC5	TRUE	TRUE	ATHL1	FALSE	FALSE	TRIM38	FALSE	FALSE
CMTM3	FALSE	FALSE	B4GALNT4	TRUE	TRUE	DDR1	TRUE	TRUE
SLC7A5	TRUE	TRUE	CD44	TRUE	TRUE	TAB2	TRUE	TRUE
CDT1	TRUE	TRUE	FTH1	TRUE	TRUE	FAM20C	TRUE	TRUE
AURKB	TRUE	TRUE	LRP5	TRUE	TRUE	CLIP2	FALSE	FALSE
PFAS	TRUE	TRUE	LTBR	FALSE	FALSE	PTPN12	TRUE	TRUE
MRPL38_RP11-552F3.12	FALSE	TRUE	PHB2	TRUE	TRUE	BLK	TRUE	TRUE
BCL2	TRUE	TRUE	ACVR1B	FALSE	FALSE	FAM86B1	FALSE	FALSE
FAM69C	FALSE	FALSE	LRP1	FALSE	FALSE	FABP5	TRUE	TRUE
NCLN	TRUE	FALSE	SCARB1	TRUE	TRUE	ATP6V1C1	TRUE	TRUE
ARHGEF18_CTB-133G6.1	TRUE	TRUE	HMGB1	TRUE	TRUE	TRIB1	TRUE	TRUE
MRPL4	FALSE	FALSE	CCNA1	TRUE	FALSE	VPS13A	FALSE	FALSE
JUNB	TRUE	TRUE	FOS	TRUE	TRUE	RXRA	TRUE	TRUE
CD22	TRUE	TRUE	IRF2BPL	TRUE	TRUE	RAB9A	FALSE	FALSE
RPL18_FAM83E	FALSE	TRUE	GLRX5	TRUE	TRUE	GK	TRUE	TRUE
RASIP1	FALSE	FALSE	SPRED1	TRUE	TRUE	VSIG4	TRUE	TRUE
LILRA5	FALSE	FALSE	BMF	TRUE	TRUE	CNR2	TRUE	TRUE
TRIM28	FALSE	FALSE	CHAC1	FALSE	FALSE	MECR	FALSE	FALSE
ID2	TRUE	TRUE	USP3	TRUE	TRUE	RNF19B	TRUE	TRUE
TRIB2	TRUE	TRUE	AC069368.3_PLEKHO2	TRUE	TRUE	SH3GLB1	FALSE	FALSE
FAHD2B	TRUE	TRUE	SMAD3	TRUE	TRUE	ADAMTSL4	TRUE	TRUE
PSD4	TRUE	TRUE	TBC1D24	TRUE	TRUE	S100A12	TRUE	TRUE
HNMT	FALSE	FALSE	CMTM3	FALSE	FALSE	S100A6	FALSE	FALSE
ACVR2A	FALSE	FALSE	SLC7A5	TRUE	TRUE	CREG1	TRUE	TRUE
ARL4C	TRUE	TRUE	CDT1	TRUE	TRUE	MYBPH	TRUE	TRUE
KIF16B	TRUE	TRUE	AURKB	TRUE	TRUE	SLC30A1	TRUE	TRUE
PMEPA1	TRUE	TRUE	PFAS	TRUE	TRUE	TARBP1	TRUE	TRUE
SLCO4A1	TRUE	TRUE	CCL4L2	TRUE	TRUE	KLF6	TRUE	TRUE
TCFL5	TRUE	TRUE	CD300LF	FALSE	FALSE	TRDMT1	TRUE	TRUE
ETS2	TRUE	TRUE	MRPL38_RP11-552F3.12	FALSE	TRUE	RHOBTB1	FALSE	FALSE
ADARB1	TRUE	TRUE	FAM69C	FALSE	FALSE	SLC29A3	TRUE	TRUE
BCR	TRUE	TRUE	NCLN	TRUE	TRUE	DDIT4	TRUE	TRUE
LGALS1	FALSE	FALSE	ARHGEF18_CTB-133G6.1	TRUE	TRUE	IFITM1_IFITM2	TRUE	TRUE
MAFF	FALSE	FALSE	CTD-3214H19.16_MCEMP1	FALSE	FALSE	MPEG1	TRUE	TRUE
TSPO	FALSE	FALSE	JUNB	TRUE	TRUE	PICALM	TRUE	TRUE
CX3CR1	TRUE	TRUE	RPL18_FAM83E	FALSE	TRUE	ETS1	TRUE	TRUE
TBL1XR1	TRUE	TRUE	RASIP1	FALSE	FALSE	GALNT8_KCNA6	TRUE	TRUE
NRROS_PIGX	TRUE	TRUE	MYADM	TRUE	TRUE	SLC2A3	TRUE	TRUE
RGS12	TRUE	TRUE	LILRA5	FALSE	FALSE	EMP1	FALSE	FALSE
STIM2	TRUE	TRUE	TTYH1	TRUE	TRUE	NAB2	TRUE	TRUE
IRX1	TRUE	TRUE	TRIM28	FALSE	FALSE	USPL1	TRUE	TRUE
UGT3A2	FALSE	FALSE	ID2	TRUE	TRUE	SERPINA1	TRUE	TRUE
SLC1A3	FALSE	FALSE	PSD4	TRUE	TRUE	ANKRD9	FALSE	FALSE
SYNPO	FALSE	FALSE	ACVR2A	FALSE	FALSE	C15orf41	FALSE	FALSE
DDR1	TRUE	TRUE	MREG_PECR	TRUE	TRUE	PIF1	FALSE	FALSE
LST1	TRUE	TRUE	SLC11A1	TRUE	TRUE	LRRC28	TRUE	TRUE
HMGA1	TRUE	TRUE	SIRPA	TRUE	TRUE	C16orf59	FALSE	FALSE
PIM1	TRUE	TRUE	PARD6B	TRUE	TRUE	IL4R	TRUE	TRUE
MYB	TRUE	TRUE	PMEPA1	TRUE	TRUE	ATP6V0D1	FALSE	FALSE
FAM20C	TRUE	TRUE	IFNAR2_IL10RB	TRUE	TRUE	ZFHX3	TRUE	TRUE
LFNG	TRUE	TRUE	BCR	TRUE	TRUE	CCL3L3	TRUE	TRUE
AEBP1	TRUE	TRUE	ZNRF3	TRUE	TRUE	HEXIM1	TRUE	TRUE
CLIP2	FALSE	FALSE	LGALS1	FALSE	FALSE	CD300E	TRUE	TRUE
FZD3	TRUE	TRUE	CX3CR1	TRUE	TRUE	RETN	FALSE	FALSE
XKR4	TRUE	TRUE	CCR1	TRUE	TRUE	RASAL3	FALSE	FALSE
ASPH_AC090094.1	TRUE	TRUE	ALCAM	TRUE	TRUE	LRRC25	FALSE	FALSE
ATP6V1C1	TRUE	TRUE	PTX3	TRUE	TRUE	CD22	TRUE	TRUE
TRIB1	TRUE	TRUE	ZMAT3	FALSE	FALSE	PRX	FALSE	FALSE
RHPN1	TRUE	FALSE	NRROS_PIGX	TRUE	TRUE	NLRP12	FALSE	FALSE
SPIN1	FALSE	FALSE	STIM2	TRUE	TRUE	LILRB2	TRUE	TRUE
TRAF1	TRUE	TRUE	UGT3A2	FALSE	FALSE	SLC27A5	FALSE	FALSE
DENND1A	FALSE	FALSE	SLC1A3	FALSE	FALSE	RNF144A	TRUE	TRUE
RXRA	TRUE	TRUE	ELL2	FALSE	FALSE	MGAT4A	TRUE	TRUE
COL5A1	TRUE	TRUE	ADRB2	TRUE	TRUE	CYTIP	TRUE	TRUE
GPSM1	FALSE	FALSE	KCNMB1	FALSE	FALSE	STK17B	TRUE	TRUE
RAB9A	FALSE	FALSE	TRIM38	FALSE	FALSE	FN1	TRUE	TRUE
GK	TRUE	TRUE	DDR1	TRUE	TRUE	TMBIM1	TRUE	TRUE
DVL1	FALSE	FALSE	LST1	TRUE	TRUE	RP4-576H24.4_SIRPB1	FALSE	FALSE
CNR2	TRUE	TRUE	PRDM1	TRUE	TRUE	ADA	TRUE	TRUE
MECR	FALSE	FALSE	FAM20C	TRUE	TRUE	RBM38	TRUE	TRUE
SCMH1	FALSE	FALSE	LFNG	TRUE	TRUE	CABLES2	FALSE	FALSE
S100A6	FALSE	FALSE	CLIP2	FALSE	FALSE	SLC2A4RG	FALSE	FALSE
CREG1	TRUE	TRUE	RBM28	FALSE	FALSE	RCAN1	TRUE	TRUE
MYBPH	TRUE	FALSE	BLK	TRUE	TRUE	OSM	TRUE	TRUE
DUSP10	TRUE	TRUE	FAM86B1	FALSE	FALSE	MYH9	TRUE	TRUE
URB2	TRUE	TRUE	ASPH_AC090094.1	TRUE	TRUE	CCNL1	TRUE	TRUE
TARBP1	TRUE	TRUE	FABP5	TRUE	TRUE	TBL1XR1	TRUE	TRUE
DDIT4	TRUE	TRUE	ATP6V1C1	TRUE	TRUE	SEL1L3	TRUE	TRUE
BUB3	TRUE	TRUE	ZHX2	TRUE	TRUE	ARAP2	TRUE	TRUE
IFITM1_IFITM2	TRUE	TRUE	TRIB1	TRUE	TRUE	ACSL1	FALSE	FALSE
ST3GAL4	TRUE	TRUE	RXRA	TRUE	TRUE	FYB	TRUE	TRUE
GALNT8_KCNA6	TRUE	TRUE	RAB9A	FALSE	FALSE	IL6ST	TRUE	TRUE
NAB2	TRUE	TRUE	GK	TRUE	TRUE	GLRX	TRUE	TRUE
CDK2AP1	TRUE	TRUE	VSIG4	TRUE	TRUE	IRF1	TRUE	TRUE
SLC15A4	TRUE	TRUE	CNR2	TRUE	TRUE	APBB3_SRA1	FALSE	FALSE
NOC4L	FALSE	FALSE	MECR	FALSE	FALSE	FBXO38	FALSE	FALSE
FGF9	TRUE	TRUE	RNF19B	TRUE	TRUE	DUSP1	TRUE	TRUE
KATNAL1	TRUE	TRUE	GSTM1_GSTM2	FALSE	FALSE	ATXN1	TRUE	TRUE
RPS6KL1	FALSE	FALSE	ADAMTSL4	TRUE	TRUE	HLA-E	FALSE	FALSE
ANKRD9	FALSE	FALSE	S100A12	TRUE	TRUE	FLOT1	FALSE	FALSE
TDRD9	FALSE	FALSE	S100A6	FALSE	FALSE	VEGFA	TRUE	TRUE
PIF1	FALSE	FALSE	CREG1	TRUE	TRUE	PTPRK	TRUE	TRUE
ARRDC4	TRUE	TRUE	MYBPH	TRUE	TRUE	MTURN	TRUE	TRUE
LRRC28	TRUE	TRUE	LBR	TRUE	TRUE	GSAP	TRUE	TRUE
C16orf59	FALSE	FALSE	TARBP1	TRUE	TRUE	KIAA1456	FALSE	FALSE
HERPUD1	TRUE	TRUE	RHOBTB1	FALSE	FALSE	MTUS1	FALSE	FALSE
ATP6V0D1	FALSE	FALSE	SLC29A3	TRUE	TRUE	BNIP3L	FALSE	FALSE
CBFA2T3	TRUE	TRUE	DDIT4	TRUE	TRUE	PAG1	TRUE	TRUE
HEXIM1	TRUE	TRUE	IFITM1_IFITM2	TRUE	TRUE	KLF10	TRUE	TRUE
NARF	TRUE	TRUE	ETS1	TRUE	TRUE	MTSS1	TRUE	TRUE
SMAD7	TRUE	TRUE	GALNT8_KCNA6	TRUE	TRUE	MYC	TRUE	TRUE
PHLPP1	TRUE	TRUE	EMP1	FALSE	FALSE	ST3GAL1	TRUE	TRUE
CYB5A	FALSE	FALSE	BIN2	TRUE	TRUE	AGO2	TRUE	TRUE
INSR	TRUE	TRUE	NAB2	TRUE	TRUE	PLEC	TRUE	TRUE
DNMT1_S1PR2	TRUE	TRUE	NOC4L	FALSE	FALSE	SYK	TRUE	TRUE
RASAL3	FALSE	FALSE	KATNAL1	TRUE	TRUE	TNFSF8	TRUE	TRUE
LRRC25	FALSE	FALSE	USPL1	TRUE	TRUE	FAM78A	FALSE	FALSE
LILRB2	TRUE	TRUE	RPS6KL1	FALSE	FALSE	TLR7	FALSE	FALSE
SLC27A5	FALSE	FALSE	ANKRD9	FALSE	FALSE	MSN	TRUE	TRUE
RNF144A	TRUE	TRUE	C15orf41	FALSE	FALSE	SUM	241	249
SEMA4C	TRUE	TRUE	PIF1	FALSE	FALSE
TMEM87B	FALSE	FALSE	SMAD6	TRUE	TRUE
TNS1	TRUE	TRUE	LRRC28	TRUE	TRUE
RAB17	TRUE	TRUE	C16orf59	FALSE	FALSE
ADA	TRUE	TRUE	HERPUD1	TRUE	TRUE
SNAI1	TRUE	TRUE	CDH11	FALSE	FALSE
RBM38	TRUE	TRUE	ATP6V0D1	FALSE	FALSE
CABLES2	FALSE	FALSE	FAM101B	FALSE	FALSE
SLC17A9	TRUE	TRUE	CCL3L3	TRUE	TRUE
SLC2A4RG	FALSE	FALSE	HEXIM1	TRUE	TRUE
ITGB2	TRUE	TRUE	CD300E	TRUE	TRUE
OSM	TRUE	TRUE	CYB5A	FALSE	FALSE
MYH9	TRUE	TRUE	INSR	TRUE	TRUE
CYTH4	TRUE	TRUE	RETN	FALSE	FALSE
POLR2F	FALSE	FALSE	RASAL3	FALSE	FALSE
CERK	TRUE	TRUE	LRRC25	FALSE	FALSE
CCR5	TRUE	TRUE	CD22	TRUE	TRUE
NADK2	TRUE	FALSE	NLRP12	FALSE	FALSE
IRF1	TRUE	TRUE	LILRB2	TRUE	TRUE
DUSP1	TRUE	TRUE	SLC27A5	FALSE	FALSE
HLA-E	FALSE	FALSE	PXDN	TRUE	TRUE
FLOT1	FALSE	FALSE	RNF144A	TRUE	TRUE
LRFN2	TRUE	TRUE	MGAT4A	TRUE	TRUE
CHST12	FALSE	FALSE	FN1	TRUE	TRUE
POLM	TRUE	TRUE	TMBIM1	TRUE	TRUE
GTF2IRD1	TRUE	FALSE	RP4-576H24.4_SIRPB1	FALSE	FALSE
EPHB4	FALSE	FALSE	CD93	TRUE	TRUE
POLR2J	FALSE	FALSE	ADA	TRUE	TRUE
INSIG1	TRUE	TRUE	SNAI1	TRUE	TRUE
RNF122	FALSE	FALSE	RBM38	TRUE	TRUE
CHD7	TRUE	TRUE	SLC2A4RG	FALSE	FALSE
KLF10	TRUE	TRUE	RCAN1	TRUE	TRUE
MYC	TRUE	TRUE	PTTG1IP	TRUE	TRUE
AGO2	TRUE	TRUE	IGLL5	TRUE	TRUE
LY6E	TRUE	FALSE	XBP1	TRUE	TRUE
ZNF696	TRUE	TRUE	OSM	TRUE	TRUE
PLEC	TRUE	TRUE	MYH9	TRUE	TRUE
DAPK1	TRUE	TRUE	CERK	TRUE	TRUE
SYK	TRUE	TRUE	NFKBIZ	TRUE	TRUE
STRBP	TRUE	TRUE	CCNL1	TRUE	TRUE
IER5L	FALSE	FALSE	TBL1XR1	TRUE	TRUE
FAM78A	FALSE	FALSE	ACSL1	FALSE	FALSE
QSOX2	TRUE	TRUE	NADK2	TRUE	TRUE
DPP7	FALSE	FALSE	GLRX	TRUE	TRUE
TUBB4B	FALSE	FALSE	IRF1	TRUE	TRUE
DPH7_ZMYND19	FALSE	FALSE	APBB3_SRA1	FALSE	FALSE
TLR7	FALSE	FALSE	FBXO38	FALSE	FALSE
SUM	261	277	DUSP1	TRUE	TRUE
			HLA-E	FALSE	FALSE
			FLOT1	FALSE	FALSE
			CHST12	FALSE	FALSE
			EPHB4	FALSE	FALSE
			POLR2J	FALSE	FALSE
			LRRC4	TRUE	TRUE
			INSIG1	TRUE	TRUE
			CHD7	TRUE	TRUE
			PAG1	TRUE	TRUE
			KLF10	TRUE	TRUE
			MYC	TRUE	TRUE
			AGO2	TRUE	TRUE
			PLEC	TRUE	TRUE
			SYK	TRUE	TRUE
			TNFSF8	TRUE	TRUE
			FAM78A	FALSE	FALSE
			DPP7	FALSE	FALSE
			TUBB4B	FALSE	FALSE
			TLR7	FALSE	FALSE
			MSN	TRUE	TRUE
			SUM	279	295
