# Supplementary material for: Evidence for additive and synergistic action of mammalian enhancers during cell fate determination
Source: eLife. 2021 Mar 26;10:e65381. doi: 10.7554/eLife.65381 (PMC8004103; doi:10.7554/eLife.65381)
Supplement: Supplementary file 2. [file elife-65381-supp2.xlsx]

## Sheet: SUPER.EB0
Category	Term	Count	%	PValue	Genes	List Total	Pop Hits	Pop Total	Fold Enrichment	Bonferroni	Benjamini	FDR
GOTERM_BP_ALL	GO:0002521~leukocyte differentiation	16	9.03955	3.91483e-05	JAG2, PRKCZ, ZFP36L2, LFNG, LGALS1, UBASH3B, MYC, CLCF1, IRF1, MYH9, TCF3, LTBR, JAK3, JUNB, ZFPM1, CARD11	158	474	16792	3.58746	0.122364	0.0659137	0.065459
GOTERM_BP_ALL	GO:0001775~cell activation	23	12.9944	3.95403e-05	JAG2, CDKN1A, LST1, ITGB2, RASAL3, PRKCZ, ZFP36L2, PRAM1, IL17RA, LFNG, CCND3, HSH2D, LGALS1, UBASH3B, CLCF1, IRF1, GNA12, MYH9, TCF3, LTBR, JAK3, ZFPM1, CARD11	158	910	16792	2.68616	0.12351	0.0659137	0.065459
GOTERM_BP_ALL	GO:0045321~leukocyte activation	20	11.2994	7.14692e-05	JAG2, CDKN1A, LST1, ITGB2, RASAL3, PRKCZ, ZFP36L2, PRAM1, LFNG, CCND3, HSH2D, LGALS1, CLCF1, IRF1, MYH9, TCF3, LTBR, JAK3, ZFPM1, CARD11	158	747	16792	2.84547	0.212023	0.0680972	0.0676274
GOTERM_BP_ALL	GO:0046649~lymphocyte activation	18	10.1695	0.000110548	JAG2, CDKN1A, LST1, ITGB2, RASAL3, PRKCZ, ZFP36L2, LFNG, CCND3, HSH2D, LGALS1, CLCF1, IRF1, MYH9, TCF3, JAK3, ZFPM1, CARD11	158	643	16792	2.97514	0.30829	0.0680972	0.0676274
GOTERM_BP_ALL	GO:0051726~regulation of cell cycle	23	12.9944	0.000110798	HEXIM1, CDT1, CDKN1A, DUSP1, INSR, ARID3A, ADARB1, ZFP36L2, AURKB, TOM1L2, CCND3, TFAP4, MYC, IRF1, GSG2, RACK1, ID3, E2F2, TCF3, AURKAIP1, PRKACA, JUNB, ANAPC2	158	976	16792	2.50451	0.308867	0.0680972	0.0676274
GOTERM_BP_ALL	GO:0002376~immune system process	42	23.7288	0.00012255	CDKN1A, LST1, ITGB2, PLD4, ADARB1, RASAL3, PRKCZ, PRAM1, ZFP36L2, LILRA5, LFNG, CCND3, LGALS1, UBASH3B, TRIM28, FCGRT, MYC, BSG, PRKACA, JAK3, JUNB, LAIR1, JAG2, GSDMD, BTNL8, DAPK1, GLRX5, TUBB4B, IL17RA, SLC7A5, HSH2D, IRF1, CLCF1, DDIT4, PXDN, ORAI1, MYH9, TCF3, LTBR, ZFPM1, CARD11, CD22	158	2465	16792	1.81083	0.335425	0.0680972	0.0676274
GOTERM_BP_ALL	GO:0007049~cell cycle	32	18.0791	0.00015404	CDKN1A, ANKLE1, TTYH1, UHRF1, TRIOBP, ZFP36L2, AURKB, LFNG, CCND3, MYC, GSG2, RACK1, SPIN1, E2F2, PRKACA, POLE, JAG2, HEXIM1, CDT1, DUSP1, INSR, TDRD9, ARID3A, TUBB4B, PPP1CA, TOM1L2, TFAP4, IRF1, MYH9, TCF3, AURKAIP1, ANAPC2	158	1672	16792	2.03404	0.401669	0.0733673	0.0728611
GOTERM_BP_ALL	GO:0031329~regulation of cellular catabolic process	13	7.34463	0.000225748	INSR, PTTG1IP, ZFP36L2, PPP1CA, MYC, GNA12, AGO2, DVL1, RACK1, ATP13A2, PRKACA, RNF166, ANAPC2	158	377	16792	3.66478	0.52892	0.0940804	0.0934313
GOTERM_BP_ALL	GO:0051248~negative regulation of protein metabolic process	23	12.9944	0.000307009	RTN4R, HEXIM1, CDKN1A, NXN, DAPK1, DUSP1, ADARB1, NOC2L, MEX3D, PRKCZ, ZFP36L2, TFAP4, UBASH3B, MYC, DDIT4, AGO2, DVL1, RACK1, TSPO, ATP13A2, CHAC1, ZFPM1, ANAPC2	158	1049	16792	2.33022	0.640746	0.102366	0.10166
GOTERM_BP_ALL	GO:0009894~regulation of catabolic process	15	8.47458	0.000307038	SCARB1, INSR, PTTG1IP, ZFP36L2, PPP1CA, MYC, DDIT4, GNA12, AGO2, DVL1, RACK1, ATP13A2, PRKACA, RNF166, ANAPC2	158	509	16792	3.13198	0.640781	0.102366	0.10166
GOTERM_BP_ALL	GO:0031400~negative regulation of protein modification process	16	9.03955	0.00034679	RTN4R, HEXIM1, CDKN1A, NXN, DUSP1, ADARB1, NOC2L, PRKCZ, TFAP4, UBASH3B, MYC, DDIT4, DVL1, RACK1, TSPO, ANAPC2	158	578	16792	2.94196	0.685382	0.104417	0.103697
GOTERM_BP_ALL	GO:0032269~negative regulation of cellular protein metabolic process	22	12.4294	0.000375826	RTN4R, HEXIM1, CDKN1A, NXN, DAPK1, DUSP1, ADARB1, NOC2L, MEX3D, PRKCZ, ZFP36L2, TFAP4, UBASH3B, MYC, DDIT4, AGO2, DVL1, RACK1, TSPO, ATP13A2, CHAC1, ANAPC2	158	992	16792	2.35698	0.714422	0.104417	0.103697
GOTERM_BP_ALL	GO:0030097~hemopoiesis	18	10.1695	0.000560014	JAG2, GLRX5, PLD4, PRKCZ, ZFP36L2, LFNG, LGALS1, UBASH3B, MYC, CLCF1, IRF1, MYH9, TCF3, LTBR, JAK3, JUNB, ZFPM1, CARD11	158	739	16792	2.58865	0.845507	0.124044	0.123188
GOTERM_BP_ALL	GO:0048523~negative regulation of cellular process	60	33.8983	0.000595055	CDKN1A, SLC27A1, LST1, ADARB1, NOC2L, TRIOBP, LFNG, LGALS1, TRIM28, UBASH3B, MYC, PALM, RACK1, TSPO, CHAC1, PRKACA, JAK3, JUNB, BAHCC1, SEMA6B, EGFL7, DUSP1, DAPK1, RHBDF2, ATAD3A, TOM1L2, HSH2D, IRF1, DDIT4, PXDN, ADGRB1, MYH9, MZF1, AURKAIP1, ZFPM1, GRID2IP, ANAPC2, RTN4R, UHRF1, NXN, PTTG1IP, RASAL3, PRKCZ, RASIP1, ZFP36L2, AURKB, RXRA, DVL1, TNRC18, HEXIM1, TBCD, ARID3A, MEX3D, TFAP4, COL5A1,…	158	4300	16792	1.48296	0.862551	0.124044	0.123188
GOTERM_BP_ALL	GO:0010563~negative regulation of phosphorus metabolic process	15	8.47458	0.000595291	RTN4R, HEXIM1, CDKN1A, SLC27A1, DUSP1, ADARB1, PRKCZ, TFAP4, UBASH3B, MYC, PALM, DDIT4, DVL1, RACK1, TSPO	158	544	16792	2.93047	0.862659	0.124044	0.123188
GOTERM_BP_ALL	GO:0045936~negative regulation of phosphate metabolic process	15	8.47458	0.000595291	RTN4R, HEXIM1, CDKN1A, SLC27A1, DUSP1, ADARB1, PRKCZ, TFAP4, UBASH3B, MYC, PALM, DDIT4, DVL1, RACK1, TSPO	158	544	16792	2.93047	0.862659	0.124044	0.123188
GOTERM_BP_ALL	GO:0051128~regulation of cellular component organization	38	21.4689	0.000674451	RTN4R, SCARB1, CDKN1A, UHRF1, LST1, ITGB2, NOC2L, RASGRP2, PRKCZ, SYNE3, TRIOBP, AURKB, PPP3CC, NCLN, LGALS1, TRIM28, MYC, PALM, GNA12, DVL1, RACK1, TSPO, PRKACA, SEMA6B, VASP, METRN, DUSP1, INSR, TBCD, TOM1L2, FMNL1, COL5A1, ADGRB1, MYH9, ATP13A2, AURKAIP1, DBN1, ANAPC2	158	2323	16792	1.73852	0.894535	0.126402	0.12553
GOTERM_BP_ALL	GO:0030098~lymphocyte differentiation	11	6.21469	0.000682436	JAG2, LFNG, LGALS1, CLCF1, IRF1, TCF3, JAK3, PRKCZ, ZFPM1, CARD11, ZFP36L2	158	310	16792	3.77117	0.897308	0.126402	0.12553
GOTERM_BP_ALL	GO:0007159~leukocyte cell-cell adhesion	14	7.9096	0.000720455	JAG2, ITGB2, RASAL3, PRKCZ, ZFP36L2, LFNG, CCND3, HSH2D, LGALS1, IRF1, MYH9, JAK3, ZFPM1, CARD11	158	491	16792	3.03034	0.909541	0.126421	0.125549
GOTERM_BP_ALL	GO:0051246~regulation of protein metabolic process	40	22.5989	0.000768675	RTN4R, CDKN1A, SLC27A1, UHRF1, NXN, ITGB2, ADARB1, PTTG1IP, NOC2L, PRKCZ, ZFP36L2, CCND3, RXRA, UBASH3B, MYC, GNA12, DVL1, RACK1, TSPO, CHAC1, PRKACA, HEXIM1, DAPK1, DUSP1, INSR, MEX3D, PPP1CA, TFAP4, IRF1, CLCF1, DDIT4, AGO2, MYH9, ATP13A2, LTBR, AURKAIP1, ZFPM1, CARD11, RNF166, ANAPC2	158	2512	16792	1.69233	0.922984	0.128138	0.127254
GOTERM_BP_ALL	GO:0048534~hematopoietic or lymphoid organ development	18	10.1695	0.00099053	JAG2, GLRX5, PLD4, PRKCZ, ZFP36L2, LFNG, LGALS1, UBASH3B, MYC, CLCF1, IRF1, MYH9, TCF3, LTBR, JAK3, JUNB, ZFPM1, CARD11	158	778	16792	2.45889	0.963266	0.136613	0.13567
GOTERM_BP_ALL	GO:0098602~single organism cell adhesion	18	10.1695	0.00100452	JAG2, TTYH1, ITGB2, RASAL3, PRKCZ, TRIOBP, ZFP36L2, LFNG, CCND3, HSH2D, LGALS1, UBASH3B, IRF1, MYH9, RADIL, JAK3, ZFPM1, CARD11	158	779	16792	2.45573	0.964943	0.136613	0.13567
GOTERM_BP_ALL	GO:0070489~T cell aggregation	13	7.34463	0.00100501	JAG2, RASAL3, PRKCZ, ZFP36L2, LFNG, CCND3, HSH2D, LGALS1, IRF1, MYH9, JAK3, ZFPM1, CARD11	158	446	16792	3.0978	0.964999	0.136613	0.13567
GOTERM_BP_ALL	GO:0042110~T cell activation	13	7.34463	0.00100501	JAG2, RASAL3, PRKCZ, ZFP36L2, LFNG, CCND3, HSH2D, LGALS1, IRF1, MYH9, JAK3, ZFPM1, CARD11	158	446	16792	3.0978	0.964999	0.136613	0.13567
GOTERM_BP_ALL	GO:0071593~lymphocyte aggregation	13	7.34463	0.00102452	JAG2, RASAL3, PRKCZ, ZFP36L2, LFNG, CCND3, HSH2D, LGALS1, IRF1, MYH9, JAK3, ZFPM1, CARD11	158	447	16792	3.09087	0.967206	0.136613	0.13567
GOTERM_BP_ALL	GO:0050793~regulation of developmental process	35	19.774	0.00112075	RTN4R, LST1, ITGB2, PRKCZ, SYNE3, TRIOBP, ZFP36L2, LFNG, RXRA, LGALS1, UBASH3B, MYC, PALM, GNA12, DVL1, RACK1, TSPO, PRKACA, JAK3, SEMA6B, GAMT, METRN, INSR, FMNL1, COL5A1, IRF1, CLCF1, ADGRB1, ID3, MYH9, TCF3, ZFPM1, CARD11, DBN1, ANAPC2	158	2129	16792	1.74718	0.976215	0.136613	0.13567
GOTERM_BP_ALL	GO:0030154~cell differentiation	52	29.3785	0.00115354	GPSM1, CDKN1A, LST1, ITGB2, TRIOBP, PCSK4, RPS15, LFNG, LGALS1, TRIM28, UBASH3B, MYC, PALM, TSPO, CHAC1, RPS11, PRKACA, JAK3, JUNB, SEMA6B, EGFL7, METRN, SLC7A5, IRF1, DDIT4, ADGRB1, MYH9, ZFPM1, CARD11, DBN1, ANAPC2, RTN4R, NXN, PLD4, PRKCZ, RASIP1, ZFP36L2, RXRA, DVL1, GNA12, TCFL5, JAG2, VASP, TMEM120B, TDRD9, RMDN3, COL5A1, CLCF1, ID3, RADIL, TCF3, LTBR	158	3652	16792	1.51328	0.978681	0.136613	0.13567
GOTERM_BP_ALL	GO:0070486~leukocyte aggregation	13	7.34463	0.00117016	JAG2, RASAL3, PRKCZ, ZFP36L2, LFNG, CCND3, HSH2D, LGALS1, IRF1, MYH9, JAK3, ZFPM1, CARD11	158	454	16792	3.04322	0.979831	0.136613	0.13567
GOTERM_BP_ALL	GO:0001933~negative regulation of protein phosphorylation	12	6.77966	0.00118829	RTN4R, HEXIM1, CDKN1A, TFAP4, UBASH3B, DUSP1, MYC, DDIT4, DVL1, RACK1, ADARB1, PRKCZ	158	393	16792	3.24514	0.981015	0.136613	0.13567
GOTERM_BP_ALL	GO:0031324~negative regulation of cellular metabolic process	37	20.904	0.0015811	RTN4R, CDKN1A, SLC27A1, UHRF1, NXN, ADARB1, NOC2L, PRKCZ, ZFP36L2, AURKB, RXRA, UBASH3B, TRIM28, MYC, PALM, DVL1, RACK1, TSPO, TNRC18, CHAC1, JAK3, JUNB, BAHCC1, HEXIM1, DAPK1, DUSP1, MEX3D, TFAP4, IRF1, DDIT4, AGO2, ID3, ATP13A2, TCF3, MZF1, ZFPM1, ANAPC2	158	2345	16792	1.67689	0.994885	0.168983	0.167817
GOTERM_BP_ALL	GO:0032268~regulation of cellular protein metabolic process	37	20.904	0.00159307	RTN4R, CDKN1A, SLC27A1, UHRF1, NXN, ITGB2, ADARB1, PTTG1IP, NOC2L, PRKCZ, ZFP36L2, CCND3, RXRA, UBASH3B, MYC, GNA12, DVL1, RACK1, TSPO, CHAC1, PRKACA, HEXIM1, DAPK1, DUSP1, INSR, MEX3D, PPP1CA, TFAP4, CLCF1, DDIT4, AGO2, MYH9, ATP13A2, LTBR, AURKAIP1, RNF166, ANAPC2	158	2346	16792	1.67617	0.995085	0.168983	0.167817
GOTERM_BP_ALL	GO:0048869~cellular developmental process	55	31.0734	0.00164932	GPSM1, CDKN1A, LST1, ITGB2, SYNE3, TRIOBP, PCSK4, RPS15, LFNG, LGALS1, TRIM28, UBASH3B, MYC, PALM, TSPO, CHAC1, RPS11, PRKACA, JAK3, JUNB, SEMA6B, EGFL7, METRN, SLC7A5, IRF1, DDIT4, ADGRB1, MYH9, ATP6V0D1, ZFPM1, CARD11, DBN1, ANAPC2, RTN4R, NXN, PLD4, PRKCZ, RASIP1, ZFP36L2, RXRA, DVL1, GNA12, TCFL5, JAG2, VASP, TMEM120B, TDRD9, RMDN3, FMNL1, COL5A1, CLCF1, ID3, RADIL, TCF3, LTBR	158	3992	16792	1.46426	0.995927	0.168983	0.167817
GOTERM_BP_ALL	GO:0006469~negative regulation of protein kinase activity	9	5.08475	0.00176357	RTN4R, HEXIM1, CDKN1A, TFAP4, UBASH3B, DUSP1, DVL1, RACK1, ADARB1	158	237	16792	4.03589	0.997219	0.168983	0.167817
GOTERM_BP_ALL	GO:0002520~immune system development	18	10.1695	0.00176607	JAG2, GLRX5, PLD4, PRKCZ, ZFP36L2, LFNG, LGALS1, UBASH3B, MYC, CLCF1, IRF1, MYH9, TCF3, LTBR, JAK3, JUNB, ZFPM1, CARD11	158	821	16792	2.3301	0.997242	0.168983	0.167817
GOTERM_BP_ALL	GO:0007154~cell communication	78	44.0678	0.00177397	GPSM1, SCARB1, CDKN1A, SLC27A1, ITGB2, NOC2L, PITPNC1, RAPGEFL1, LFNG, CCND3, PPP3CC, LGALS1, TRIM28, UBASH3B, FCGRT, MYC, GSG2, BSG, PALM, RACK1, SPIN1, TSPO, CHAC1, PRKACA, JAK3, SEMA6B, EGFL7, DUSP1, DAPK1, RFC2, RHBDF2, IL17RA, ARHGAP45, TOM1L2, HSH2D, IRF1, DDIT4, PXDN, ADGRB1, MYH9, ATP6V0D1, CARD11, DBN1, GRID2IP, ANAPC2, LY6E, RTN4R, NXN, PTTG1IP, RASAL3, RASGRP2, PRKCZ, RASIP1, PRAM1, ZF…	158	6275	16792	1.32107	0.997314	0.168983	0.167817
GOTERM_BP_ALL	GO:0007165~signal transduction	73	41.2429	0.00184817	GPSM1, SCARB1, CDKN1A, SLC27A1, ITGB2, NOC2L, PITPNC1, RAPGEFL1, LFNG, CCND3, PPP3CC, LGALS1, TRIM28, UBASH3B, FCGRT, MYC, GSG2, BSG, PALM, RACK1, SPIN1, TSPO, CHAC1, PRKACA, JAK3, SEMA6B, EGFL7, DUSP1, DAPK1, RFC2, RHBDF2, IL17RA, ARHGAP45, TOM1L2, HSH2D, IRF1, DDIT4, PXDN, ADGRB1, MYH9, ATP6V0D1, CARD11, LY6E, RTN4R, NXN, PTTG1IP, RASAL3, RASGRP2, PRKCZ, RASIP1, PRAM1, ZFP36L2, AURKB, RXRA, CAS…	158	5775	16792	1.34343	0.997904	0.171161	0.16998
GOTERM_BP_ALL	GO:0009966~regulation of signal transduction	41	23.1638	0.00196116	GPSM1, RTN4R, NXN, PTTG1IP, RASAL3, NOC2L, PRKCZ, AURKB, LFNG, PPP3CC, NCLN, LGALS1, UBASH3B, MYC, GNG7, PALM, GNA12, DVL1, RACK1, SPIN1, CHAC1, PRKACA, JAG2, HEXIM1, EGFL7, DAPK1, RFC2, DUSP1, INSR, RHBDF2, MIB2, ARHGAP45, PPP1CA, HSH2D, TFAP4, IRF1, CLCF1, DDIT4, PXDN, LTBR, CARD11	158	2728	16792	1.59729	0.998563	0.175356	0.174146
GOTERM_BP_ALL	GO:1902105~regulation of leukocyte differentiation	9	5.08475	0.00211473	LGALS1, UBASH3B, MYC, IRF1, JAK3, PRKCZ, ZFPM1, CARD11, ZFP36L2	158	244	16792	3.92011	0.999139	0.175356	0.174146
GOTERM_BP_ALL	GO:0022610~biological adhesion	29	16.3842	0.00220365	SCARB1, TTYH1, ITGB2, RASAL3, PRKCZ, TRIOBP, ZFP36L2, LFNG, CCND3, LGALS1, UBASH3B, BSG, RACK1, JAK3, JAG2, VASP, EGFL7, TBCD, HSH2D, COL5A1, IRF1, ADGRB1, MYH9, RADIL, ZFPM1, CARD11, DBN1, CD22, PLEC	158	1705	16792	1.80767	0.999361	0.175356	0.174146
GOTERM_BP_ALL	GO:0048519~negative regulation of biological process	61	34.4633	0.00224913	CDKN1A, SLC27A1, LST1, ADARB1, NOC2L, TRIOBP, LFNG, LGALS1, TRIM28, UBASH3B, MYC, PALM, RACK1, TSPO, CHAC1, PRKACA, JAK3, JUNB, BAHCC1, SEMA6B, EGFL7, DUSP1, DAPK1, RHBDF2, ATAD3A, TOM1L2, HSH2D, IRF1, DDIT4, PXDN, ADGRB1, MYH9, MZF1, AURKAIP1, ZFPM1, GRID2IP, ANAPC2, RTN4R, UHRF1, NXN, PTTG1IP, RASAL3, PRKCZ, RASIP1, ZFP36L2, AURKB, RXRA, DVL1, TNRC18, HEXIM1, TDRD9, TBCD, ARID3A, MEX3D, TFAP4, …	158	4623	16792	1.40233	0.999451	0.175356	0.174146
GOTERM_BP_ALL	GO:0010646~regulation of cell communication	44	24.8588	0.00225834	GPSM1, RTN4R, NXN, PTTG1IP, RASAL3, NOC2L, PRKCZ, AURKB, LFNG, PPP3CC, NCLN, LGALS1, UBASH3B, MYC, GNG7, PALM, GNA12, DVL1, RACK1, SPIN1, CHAC1, PRKACA, JAG2, HEXIM1, EGFL7, DAPK1, RFC2, DUSP1, INSR, RHBDF2, MIB2, ARHGAP45, PPP1CA, HSH2D, TFAP4, IRF1, CLCF1, DDIT4, PXDN, LTBR, CARD11, DBN1, GRID2IP, ANAPC2	158	3020	16792	1.54843	0.999467	0.175356	0.174146
GOTERM_BP_ALL	GO:0042326~negative regulation of phosphorylation	12	6.77966	0.00232671	RTN4R, HEXIM1, CDKN1A, TFAP4, UBASH3B, DUSP1, MYC, DDIT4, DVL1, RACK1, ADARB1, PRKCZ	158	428	16792	2.97977	0.999576	0.175356	0.174146
GOTERM_BP_ALL	GO:0008360~regulation of cell shape	7	3.9548	0.00243379	FMNL1, GNA12, LST1, PALM, ITGB2, MYH9, SYNE3	158	145	16792	5.13069	0.999704	0.175356	0.174146
GOTERM_BP_ALL	GO:0070229~negative regulation of lymphocyte apoptotic process	4	2.25989	0.00245108	HSH2D, NOC2L, JAK3, AURKB	158	29	16792	14.6591	0.99972	0.175356	0.174146
GOTERM_BP_ALL	GO:0051052~regulation of DNA metabolic process	11	6.21469	0.00255043	CDT1, CDKN1A, TRIM28, DUSP1, UHRF1, RFC2, MYC, CLCF1, INSR, ID3, AURKB	158	370	16792	3.15963	0.999799	0.175356	0.174146
GOTERM_BP_ALL	GO:0010605~negative regulation of macromolecule metabolic process	36	20.339	0.0026187	RTN4R, CDKN1A, UHRF1, NXN, ADARB1, NOC2L, PRKCZ, ZFP36L2, AURKB, RXRA, UBASH3B, TRIM28, MYC, DVL1, RACK1, TSPO, TNRC18, CHAC1, JAK3, JUNB, BAHCC1, HEXIM1, DAPK1, DUSP1, TDRD9, MEX3D, TFAP4, IRF1, DDIT4, AGO2, ID3, ATP13A2, TCF3, MZF1, ZFPM1, ANAPC2	158	2326	16792	1.64489	0.99984	0.175356	0.174146
GOTERM_BP_ALL	GO:0050670~regulation of lymphocyte proliferation	8	4.51977	0.00262828	CDKN1A, CLCF1, IRF1, LST1, TCF3, RASAL3, JAK3, CARD11	158	198	16792	4.29408	0.999845	0.175356	0.174146
GOTERM_BP_ALL	GO:0050865~regulation of cell activation	13	7.34463	0.00266008	CDKN1A, LST1, RASAL3, PRKCZ, ZFP36L2, PRAM1, LGALS1, UBASH3B, CLCF1, IRF1, TCF3, JAK3, CARD11	158	501	16792	2.75773	0.999861	0.175356	0.174146
GOTERM_BP_ALL	GO:0031327~negative regulation of cellular biosynthetic process	26	14.6893	0.00267997	SLC27A1, UHRF1, NOC2L, ZFP36L2, AURKB, RXRA, TRIM28, MYC, PALM, RACK1, TSPO, TNRC18, JAK3, JUNB, BAHCC1, HEXIM1, DAPK1, DUSP1, MEX3D, TFAP4, IRF1, AGO2, ID3, TCF3, MZF1, ZFPM1	158	1480	16792	1.86705	0.99987	0.175356	0.174146
GOTERM_BP_ALL	GO:0032944~regulation of mononuclear cell proliferation	8	4.51977	0.00269865	CDKN1A, CLCF1, IRF1, LST1, TCF3, RASAL3, JAK3, CARD11	158	199	16792	4.2725	0.999878	0.175356	0.174146
GOTERM_BP_ALL	GO:0033673~negative regulation of kinase activity	9	5.08475	0.00270989	RTN4R, HEXIM1, CDKN1A, TFAP4, UBASH3B, DUSP1, DVL1, RACK1, ADARB1	158	254	16792	3.76577	0.999882	0.175356	0.174146
GOTERM_BP_ALL	GO:0023052~signaling	77	43.5028	0.002735	GPSM1, SCARB1, CDKN1A, SLC27A1, ITGB2, NOC2L, PITPNC1, RAPGEFL1, LFNG, CCND3, PPP3CC, LGALS1, TRIM28, UBASH3B, FCGRT, MYC, GSG2, BSG, PALM, RACK1, SPIN1, TSPO, CHAC1, PRKACA, JAK3, SEMA6B, EGFL7, DUSP1, DAPK1, RFC2, RHBDF2, IL17RA, ARHGAP45, TOM1L2, HSH2D, IRF1, DDIT4, PXDN, ADGRB1, MYH9, ATP6V0D1, CARD11, DBN1, GRID2IP, ANAPC2, LY6E, RTN4R, NXN, PTTG1IP, RASAL3, RASGRP2, PRKCZ, RASIP1, PRAM1, ZF…	158	6260	16792	1.30726	0.999892	0.175356	0.174146
GOTERM_BP_ALL	GO:0009892~negative regulation of metabolic process	38	21.4689	0.00299681	RTN4R, CDKN1A, SLC27A1, UHRF1, NXN, ADARB1, NOC2L, PRKCZ, ZFP36L2, AURKB, RXRA, UBASH3B, TRIM28, MYC, PALM, DVL1, RACK1, TSPO, TNRC18, CHAC1, JAK3, JUNB, BAHCC1, HEXIM1, DAPK1, DUSP1, TDRD9, MEX3D, TFAP4, IRF1, DDIT4, AGO2, ID3, ATP13A2, TCF3, MZF1, ZFPM1, ANAPC2	158	2522	16792	1.60134	0.999955	0.18458	0.183306
GOTERM_BP_ALL	GO:0007275~multicellular organism development	63	35.5932	0.00306619	GPSM1, CDKN1A, LST1, ITGB2, RAPGEFL1, LFNG, PPP3CC, LGALS1, TRIM28, UBASH3B, MYC, BSG, PALM, RACK1, SPIN1, TSPO, CHAC1, PRKACA, JAK3, JUNB, POLE, SEMA6B, GAMT, EGFL7, METRN, DUSP1, GLRX5, SLC7A5, IRF1, DDIT4, ADGRB1, ORAI1, MYH9, ATP6V0D1, ZFPM1, CARD11, DBN1, ANAPC2, RTN4R, NXN, PLD4, PRKCZ, RASIP1, ZFP36L2, AURKB, RXRA, DVL1, GNA12, TCFL5, JAG2, VASP, HEXIM1, INSR, TDRD9, PPP1CA, COL5A1, CLCF1,…	158	4877	16792	1.37288	0.999964	0.18458	0.183306
GOTERM_BP_ALL	GO:0030217~T cell differentiation	8	4.51977	0.00309725	JAG2, LFNG, IRF1, JAK3, PRKCZ, ZFPM1, CARD11, ZFP36L2	158	204	16792	4.16778	0.999968	0.18458	0.183306
GOTERM_BP_ALL	GO:0023051~regulation of signaling	44	24.8588	0.00310374	GPSM1, RTN4R, NXN, PTTG1IP, RASAL3, NOC2L, PRKCZ, AURKB, LFNG, PPP3CC, NCLN, LGALS1, UBASH3B, MYC, GNG7, PALM, GNA12, DVL1, RACK1, SPIN1, CHAC1, PRKACA, JAG2, HEXIM1, EGFL7, DAPK1, RFC2, DUSP1, INSR, RHBDF2, MIB2, ARHGAP45, PPP1CA, HSH2D, TFAP4, IRF1, CLCF1, DDIT4, PXDN, LTBR, CARD11, DBN1, GRID2IP, ANAPC2	158	3070	16792	1.52321	0.999968	0.18458	0.183306
GOTERM_BP_ALL	GO:0048583~regulation of response to stimulus	50	28.2486	0.00325809	GPSM1, ANKLE1, ITGB2, NOC2L, LFNG, PPP3CC, LGALS1, TRIM28, UBASH3B, FCGRT, MYC, PALM, RACK1, SPIN1, CHAC1, PRKACA, JAK3, SEMA6B, EGFL7, DUSP1, DAPK1, RFC2, RHBDF2, IL17RA, ARHGAP45, HSH2D, IRF1, DDIT4, PXDN, CARD11, RTN4R, NXN, PTTG1IP, RASAL3, PRKCZ, PRAM1, AURKB, NCLN, GNG7, DVL1, GNA12, LAIR1, JAG2, HEXIM1, INSR, MIB2, PPP1CA, TFAP4, CLCF1, LTBR	158	3636	16792	1.46148	0.999981	0.18458	0.183306
GOTERM_BP_ALL	GO:0016337~single organismal cell-cell adhesion	16	9.03955	0.00331306	JAG2, TTYH1, ITGB2, RASAL3, PRKCZ, ZFP36L2, LFNG, CCND3, HSH2D, LGALS1, UBASH3B, IRF1, MYH9, JAK3, ZFPM1, CARD11	158	725	16792	2.34546	0.999984	0.18458	0.183306
GOTERM_BP_ALL	GO:0009890~negative regulation of biosynthetic process	26	14.6893	0.00331498	SLC27A1, UHRF1, NOC2L, ZFP36L2, AURKB, RXRA, TRIM28, MYC, PALM, RACK1, TSPO, TNRC18, JAK3, JUNB, BAHCC1, HEXIM1, DAPK1, DUSP1, MEX3D, TFAP4, IRF1, AGO2, ID3, TCF3, MZF1, ZFPM1	158	1504	16792	1.83726	0.999984	0.18458	0.183306
GOTERM_BP_ALL	GO:0046651~lymphocyte proliferation	9	5.08475	0.00335086	CCND3, CDKN1A, CLCF1, IRF1, LST1, TCF3, RASAL3, JAK3, CARD11	158	263	16792	3.63691	0.999986	0.18458	0.183306
GOTERM_BP_ALL	GO:0070663~regulation of leukocyte proliferation	8	4.51977	0.00344794	CDKN1A, CLCF1, IRF1, LST1, TCF3, RASAL3, JAK3, CARD11	158	208	16792	4.08763	0.99999	0.18458	0.183306
GOTERM_BP_ALL	GO:0044700~single organism signaling	76	42.9379	0.00346702	GPSM1, SCARB1, CDKN1A, SLC27A1, ITGB2, NOC2L, PITPNC1, RAPGEFL1, LFNG, CCND3, PPP3CC, LGALS1, TRIM28, UBASH3B, FCGRT, MYC, GSG2, BSG, PALM, RACK1, SPIN1, TSPO, CHAC1, PRKACA, JAK3, SEMA6B, EGFL7, DUSP1, DAPK1, RFC2, RHBDF2, IL17RA, ARHGAP45, TOM1L2, HSH2D, IRF1, DDIT4, PXDN, ADGRB1, MYH9, ATP6V0D1, CARD11, DBN1, GRID2IP, ANAPC2, LY6E, RTN4R, NXN, PTTG1IP, RASAL3, RASGRP2, PRKCZ, RASIP1, PRAM1, ZF…	158	6207	16792	1.3013	0.999991	0.18458	0.183306
GOTERM_BP_ALL	GO:0032943~mononuclear cell proliferation	9	5.08475	0.00350809	CCND3, CDKN1A, CLCF1, IRF1, LST1, TCF3, RASAL3, JAK3, CARD11	158	265	16792	3.60946	0.999992	0.18458	0.183306
GOTERM_BP_ALL	GO:0009790~embryo development	19	10.7345	0.00354322	JAG2, VASP, DUSP1, ITGB2, LFNG, RXRA, COL5A1, TRIM28, MYC, GNA12, DVL1, RACK1, ID3, MYH9, PLCD3, PRKACA, JUNB, POLE, ZFPM1	158	954	16792	2.11666	0.999993	0.18458	0.183306
GOTERM_BP_ALL	GO:0022402~cell cycle process	24	13.5593	0.00384345	CDT1, CDKN1A, ANKLE1, TTYH1, DUSP1, INSR, TDRD9, ARID3A, TUBB4B, TRIOBP, ZFP36L2, AURKB, LFNG, TOM1L2, TFAP4, MYC, IRF1, GSG2, MYH9, TCF3, AURKAIP1, PRKACA, POLE, ANAPC2	158	1357	16792	1.87965	0.999997	0.19714	0.19578
GOTERM_BP_ALL	GO:0010564~regulation of cell cycle process	14	7.9096	0.00392145	CDT1, CDKN1A, DUSP1, INSR, ARID3A, ZFP36L2, AURKB, TOM1L2, TFAP4, GSG2, TCF3, AURKAIP1, PRKACA, ANAPC2	158	595	16792	2.50067	0.999998	0.198093	0.196726
GOTERM_BP_ALL	GO:0031331~positive regulation of cellular catabolic process	9	5.08475	0.00410396	MYC, INSR, AGO2, DVL1, RACK1, PTTG1IP, ZFP36L2, RNF166, ANAPC2	158	272	16792	3.51657	0.999999	0.204218	0.202809
GOTERM_BP_ALL	GO:0007155~cell adhesion	28	15.8192	0.00419263	TTYH1, ITGB2, RASAL3, PRKCZ, TRIOBP, ZFP36L2, LFNG, CCND3, LGALS1, UBASH3B, BSG, RACK1, JAK3, JAG2, VASP, EGFL7, TBCD, HSH2D, COL5A1, IRF1, ADGRB1, MYH9, RADIL, ZFPM1, CARD11, DBN1, CD22, PLEC	158	1699	16792	1.7515	0.999999	0.205186	0.20377
GOTERM_BP_ALL	GO:0048522~positive regulation of cellular process	61	34.4633	0.0042465	SCARB1, CDKN1A, SLC27A1, ANKLE1, ITGB2, ADARB1, TRIOBP, LFNG, CCND3, PPP3CC, LGALS1, TRIM28, MYC, PALM, RACK1, SPIN1, TSPO, PRKACA, JAK3, JUNB, SEMA6B, EGFL7, METRN, DUSP1, DAPK1, RFC2, IL17RA, HSH2D, IRF1, DDIT4, ADGRB1, MYH9, MZF1, AURKAIP1, ZFPM1, RNF166, CARD11, ANAPC2, UHRF1, PTTG1IP, RASAL3, PRKCZ, ZFP36L2, AURKB, RXRA, DVL1, JAG2, GSDMD, VASP, HEXIM1, INSR, MIB2, ARID3A, PPP1CA, TFAP4, CLC…	158	4744	16792	1.36657	0.999999	0.205186	0.20377
GOTERM_BP_ALL	GO:0002694~regulation of leukocyte activation	12	6.77966	0.00457693	CDKN1A, LGALS1, CLCF1, IRF1, LST1, TCF3, RASAL3, JAK3, PRKCZ, CARD11, ZFP36L2, PRAM1	158	468	16792	2.72509	1	0.217993	0.216489
GOTERM_BP_ALL	GO:0045786~negative regulation of cell cycle	12	6.77966	0.0047237	HEXIM1, TOM1L2, CDKN1A, TFAP4, DUSP1, MYC, IRF1, ARID3A, AURKAIP1, PRKACA, ZFP36L2, AURKB	158	470	16792	2.71349	1	0.218782	0.217273
GOTERM_BP_ALL	GO:0072331~signal transduction by p53 class mediator	7	3.9548	0.00472474	HEXIM1, CDKN1A, TFAP4, DDIT4, E2F2, ARID3A, PTTG1IP	158	166	16792	4.48162	1	0.218782	0.217273
GOTERM_BP_ALL	GO:0070661~leukocyte proliferation	9	5.08475	0.00487755	CCND3, CDKN1A, CLCF1, IRF1, LST1, TCF3, RASAL3, JAK3, CARD11	158	280	16792	3.41609	1	0.222273	0.22074
GOTERM_BP_ALL	GO:0006955~immune response	26	14.6893	0.00493348	LST1, ITGB2, ADARB1, PRKCZ, PRAM1, LILRA5, LFNG, LGALS1, TRIM28, FCGRT, MYC, PRKACA, JAK3, LAIR1, GSDMD, BTNL8, DAPK1, TUBB4B, IRF1, CLCF1, PXDN, ORAI1, LTBR, ZFPM1, CARD11, CD22	158	1551	16792	1.78159	1	0.222273	0.22074
GOTERM_BP_ALL	GO:0045995~regulation of embryonic development	6	3.38983	0.00502737	LFNG, COL5A1, INSR, DVL1, RACK1, PRKACA	158	118	16792	5.40399	1	0.223483	0.221942
GOTERM_BP_ALL	GO:0032870~cellular response to hormone stimulus	14	7.9096	0.00522938	SLC27A1, DUSP1, INSR, PRKCZ, ZFP36L2, TFAP4, RXRA, MYC, GNG7, DDIT4, ATP6V0D1, PRKACA, JAK3, JUNB	158	616	16792	2.41542	1	0.229405	0.227822
GOTERM_BP_ALL	GO:0051249~regulation of lymphocyte activation	11	6.21469	0.00534335	CDKN1A, LGALS1, CLCF1, IRF1, LST1, TCF3, RASAL3, JAK3, PRKCZ, CARD11, ZFP36L2	158	411	16792	2.84444	1	0.230429	0.22884
GOTERM_BP_ALL	GO:0002903~negative regulation of B cell apoptotic process	3	1.69492	0.00539097	HSH2D, NOC2L, AURKB	158	12	16792	26.5696	1	0.230429	0.22884
GOTERM_BP_ALL	GO:0030890~positive regulation of B cell proliferation	4	2.25989	0.00572661	CDKN1A, CLCF1, TCF3, CARD11	158	39	16792	10.9004	1	0.2391	0.23745
GOTERM_BP_ALL	GO:0065008~regulation of biological quality	48	27.1186	0.00573725	RTN4R, SCARB1, CDKN1A, SLC27A1, NXN, LST1, ITGB2, PRKCZ, SYNE3, TRIOBP, ZFP36L2, AURKB, PPP3CC, NCLN, RXRA, LGALS1, UBASH3B, MYC, PALM, GNA12, DVL1, RACK1, TSPO, QSOX2, PRKACA, JAK3, POLE, SEMA6B, VASP, GSDMD, RFC2, GLRX5, INSR, RMDN3, MEX3D, HSH2D, FMNL1, TFAP4, SLCO4A1, IRF1, ADGRB1, MYH9, ATP13A2, ATP6V0D1, ZFPM1, DBN1, GRID2IP, ANAPC2	158	3548	16792	1.43781	1	0.2391	0.23745
GOTERM_BP_ALL	GO:2000113~negative regulation of cellular macromolecule biosynthetic process	23	12.9944	0.00591887	HEXIM1, UHRF1, DAPK1, DUSP1, NOC2L, MEX3D, ZFP36L2, AURKB, TFAP4, RXRA, TRIM28, MYC, IRF1, AGO2, RACK1, ID3, TNRC18, TCF3, MZF1, JAK3, JUNB, ZFPM1, BAHCC1	158	1324	16792	1.84623	1	0.243624	0.241943
GOTERM_BP_ALL	GO:0098609~cell-cell adhesion	21	11.8644	0.00605367	JAG2, VASP, TTYH1, ITGB2, RASAL3, PRKCZ, ZFP36L2, LFNG, CCND3, HSH2D, LGALS1, UBASH3B, IRF1, BSG, RACK1, MYH9, JAK3, ZFPM1, CARD11, DBN1, PLEC	158	1164	16792	1.9174	1	0.246133	0.244435
GOTERM_BP_ALL	GO:0009725~response to hormone	17	9.60452	0.00631461	CDKN1A, SLC27A1, DUSP1, INSR, PRKCZ, ZFP36L2, TFAP4, RXRA, MYC, GNG7, BSG, DDIT4, TSPO, ATP6V0D1, PRKACA, JAK3, JUNB	158	854	16792	2.11561	1	0.25365	0.2519
GOTERM_BP_ALL	GO:0051348~negative regulation of transferase activity	10	5.64972	0.00647587	RTN4R, HEXIM1, CDKN1A, TFAP4, UBASH3B, DUSP1, DVL1, RACK1, ADARB1, ANAPC2	158	357	16792	2.97699	1	0.25703	0.255257
GOTERM_BP_ALL	GO:0042398~cellular modified amino acid biosynthetic process	4	2.25989	0.00658953	GAMT, PTDSS2, SLC27A1, CHAC1	158	41	16792	10.3686	1	0.258464	0.256681
GOTERM_BP_ALL	GO:0051172~negative regulation of nitrogen compound metabolic process	25	14.1243	0.00675832	UHRF1, NOC2L, ZFP36L2, AURKB, RXRA, TRIM28, MYC, PALM, RACK1, TSPO, TNRC18, JUNB, BAHCC1, HEXIM1, DAPK1, DUSP1, MEX3D, TFAP4, IRF1, DDIT4, AGO2, ID3, TCF3, MZF1, ZFPM1	158	1506	16792	1.76425	1	0.262003	0.260195
GOTERM_BP_ALL	GO:0012501~programmed cell death	29	16.3842	0.00698818	CDKN1A, ITGB2, PTTG1IP, NOC2L, PRKCZ, AURKB, PPP3CC, LGALS1, MYC, RACK1, TSPO, E2F2, CHAC1, JAK3, JAG2, GSDMD, DAPK1, DUSP1, RMDN3, ATAD3A, PPP1CA, HSH2D, TFAP4, IRF1, CLCF1, DDIT4, ID3, LTBR, CARD11	158	1852	16792	1.66419	1	0.2678	0.265953
GOTERM_BP_ALL	GO:0051098~regulation of binding	9	5.08475	0.00730146	LFNG, TFAP4, TRIM28, MYC, DVL1, PRKACA, ZFPM1, AURKB, PPP1CA	158	300	16792	3.18835	1	0.276626	0.274717
GOTERM_BP_ALL	GO:0010948~negative regulation of cell cycle process	8	4.51977	0.00744374	TOM1L2, CDKN1A, TFAP4, DUSP1, ARID3A, AURKAIP1, ZFP36L2, AURKB	158	240	16792	3.54262	1	0.278788	0.276865
GOTERM_BP_ALL	GO:0043470~regulation of carbohydrate catabolic process	4	2.25989	0.00752577	MYC, INSR, DDIT4, PPP1CA	158	43	16792	9.88637	1	0.278788	0.276865
GOTERM_BP_ALL	GO:0048856~anatomical structure development	67	37.8531	0.00795182	GPSM1, CDKN1A, LST1, ITGB2, SYNE3, TRIOBP, PCSK4, RAPGEFL1, LFNG, PPP3CC, LGALS1, TRIM28, UBASH3B, MYC, BSG, PALM, RACK1, SPIN1, TSPO, CHAC1, PRKACA, JAK3, JUNB, POLE, SEMA6B, GAMT, EGFL7, METRN, DUSP1, GLRX5, SLC7A5, IRF1, DDIT4, ADGRB1, ORAI1, MYH9, ATP6V0D1, ZFPM1, CARD11, DBN1, ANAPC2, RTN4R, NXN, PLD4, PRKCZ, RASIP1, ZFP36L2, AURKB, RXRA, DVL1, GNA12, TCFL5, JAG2, VASP, HEXIM1, INSR, TDRD9, …	158	5473	16792	1.30105	1	0.28255	0.280601
GOTERM_BP_ALL	GO:0008219~cell death	30	16.9492	0.00797698	CDKN1A, ITGB2, PTTG1IP, NOC2L, PRKCZ, AURKB, PPP3CC, LGALS1, MYC, RACK1, TSPO, E2F2, CHAC1, JAK3, JAG2, GSDMD, DAPK1, DUSP1, RMDN3, ATAD3A, PPP1CA, HSH2D, TFAP4, IRF1, CLCF1, DDIT4, ID3, ATP13A2, LTBR, CARD11	158	1958	16792	1.62837	1	0.28255	0.280601
GOTERM_BP_ALL	GO:0050671~positive regulation of lymphocyte proliferation	6	3.38983	0.0080131	CDKN1A, CLCF1, TCF3, RASAL3, JAK3, CARD11	158	132	16792	4.83084	1	0.28255	0.280601
GOTERM_BP_ALL	GO:0044767~single-organism developmental process	67	37.8531	0.00802342	GPSM1, CDKN1A, LST1, ITGB2, SYNE3, TRIOBP, PCSK4, RAPGEFL1, LFNG, PPP3CC, LGALS1, TRIM28, UBASH3B, MYC, BSG, PALM, RACK1, SPIN1, TSPO, CHAC1, PRKACA, JAK3, JUNB, POLE, SEMA6B, GAMT, EGFL7, METRN, DUSP1, GLRX5, SLC7A5, IRF1, DDIT4, ADGRB1, ORAI1, MYH9, ATP6V0D1, ZFPM1, CARD11, DBN1, ANAPC2, RTN4R, NXN, PLD4, PRKCZ, RASIP1, ZFP36L2, AURKB, RXRA, DVL1, GNA12, TCFL5, JAG2, VASP, HEXIM1, INSR, TDRD9, …	158	5475	16792	1.30058	1	0.28255	0.280601
GOTERM_BP_ALL	GO:0051338~regulation of transferase activity	18	10.1695	0.00805106	RTN4R, HEXIM1, CDKN1A, SLC27A1, DUSP1, RFC2, INSR, ADARB1, PRKCZ, AURKB, CCND3, TFAP4, UBASH3B, MYC, DVL1, RACK1, PRKACA, ANAPC2	158	955	16792	2.00315	1	0.28255	0.280601
GOTERM_BP_ALL	GO:0065009~regulation of molecular function	40	22.5989	0.00815333	GPSM1, RTN4R, SCARB1, CDKN1A, SLC27A1, UHRF1, ITGB2, DENND3, ADARB1, RASAL3, RASGRP2, PRKCZ, RASIP1, RAPGEFL1, AURKB, LFNG, CCND3, UBASH3B, TRIM28, MYC, PALM, DVL1, RACK1, PRKACA, JAK3, HEXIM1, DAPK1, RFC2, DUSP1, INSR, TBCD, ARHGAP45, PPP1CA, TFAP4, ID3, ATP13A2, TCF3, ZFPM1, CARD11, ANAPC2	158	2863	16792	1.48485	1	0.283158	0.281205
GOTERM_BP_ALL	GO:0032946~positive regulation of mononuclear cell proliferation	6	3.38983	0.00826481	CDKN1A, CLCF1, TCF3, RASAL3, JAK3, CARD11	158	133	16792	4.79452	1	0.284071	0.282111
GOTERM_BP_ALL	GO:0042113~B cell activation	8	4.51977	0.0084688	LFNG, CDKN1A, LGALS1, CLCF1, TCF3, JAK3, CARD11, ZFP36L2	158	246	16792	3.45621	1	0.285409	0.283441
GOTERM_BP_ALL	GO:2000107~negative regulation of leukocyte apoptotic process	4	2.25989	0.00853673	HSH2D, NOC2L, JAK3, AURKB	158	45	16792	9.44698	1	0.285409	0.283441
GOTERM_BP_ALL	GO:0051716~cellular response to stimulus	81	45.7627	0.00856057	GPSM1, SCARB1, CDKN1A, SLC27A1, ANKLE1, ITGB2, MUM1, NOC2L, PITPNC1, RAPGEFL1, LFNG, CCND3, PPP3CC, LGALS1, TRIM28, UBASH3B, FCGRT, MYC, GSG2, BSG, PALM, RACK1, SPIN1, TSPO, CHAC1, PRKACA, JAK3, JUNB, POLE, SEMA6B, EGFL7, DUSP1, DAPK1, RFC2, RHBDF2, IL17RA, ARHGAP45, TOM1L2, HSH2D, IRF1, DDIT4, PXDN, ADGRB1, MYH9, ATP6V0D1, CARD11, LY6E, RTN4R, UHRF1, NXN, PTTG1IP, RASAL3, RASGRP2, PRKCZ, RASIP1,…	158	6927	16792	1.24275	1	0.285409	0.283441
GOTERM_BP_ALL	GO:0045595~regulation of cell differentiation	25	14.1243	0.00909194	RTN4R, PRKCZ, TRIOBP, ZFP36L2, LGALS1, UBASH3B, MYC, PALM, DVL1, TSPO, PRKACA, JAK3, JUNB, TCFL5, SEMA6B, METRN, COL5A1, IRF1, CLCF1, ID3, TCF3, ZFPM1, CARD11, DBN1, ANAPC2	158	1544	16792	1.72083	1	0.294781	0.292748
GOTERM_BP_ALL	GO:1903047~mitotic cell cycle process	17	9.60452	0.00921169	CDT1, CDKN1A, TTYH1, DUSP1, INSR, ARID3A, TUBB4B, TRIOBP, ZFP36L2, AURKB, TOM1L2, GSG2, TCF3, AURKAIP1, PRKACA, POLE, ANAPC2	158	890	16792	2.03004	1	0.294781	0.292748
GOTERM_BP_ALL	GO:1902106~negative regulation of leukocyte differentiation	5	2.82486	0.00934118	UBASH3B, MYC, IRF1, JAK3, ZFPM1	158	88	16792	6.03855	1	0.294781	0.292748
GOTERM_BP_ALL	GO:0050896~response to stimulus	94	53.1073	0.00937906	GPSM1, SCARB1, CDKN1A, SLC27A1, ANKLE1, LST1, ITGB2, MUM1, ADARB1, NOC2L, PFAS, PITPNC1, RAPGEFL1, LFNG, CCND3, PPP3CC, LGALS1, TRIM28, UBASH3B, FCGRT, MYC, GSG2, BSG, PALM, RACK1, SPIN1, TSPO, CHAC1, PRKACA, JAK3, JUNB, POLE, SEMA6B, EGFL7, DUSP1, DAPK1, RFC2, RHBDF2, IL17RA, ARHGAP45, TOM1L2, HSH2D, IRF1, DDIT4, PXDN, ADGRB1, ORAI1, MYH9, ATP6V0D1, ZFPM1, CARD11, LY6E, RTN4R, UHRF1, NXN, PTTG1I…	158	8329	16792	1.19944	1	0.294781	0.292748
GOTERM_BP_ALL	GO:1903362~regulation of cellular protein catabolic process	8	4.51977	0.00939956	GNA12, DVL1, RACK1, ATP13A2, PTTG1IP, PRKACA, RNF166, ANAPC2	158	251	16792	3.38736	1	0.294781	0.292748
GOTERM_BP_ALL	GO:0022603~regulation of anatomical structure morphogenesis	19	10.7345	0.00942235	SEMA6B, RTN4R, METRN, LST1, ITGB2, SYNE3, TRIOBP, LFNG, FMNL1, RXRA, COL5A1, MYC, PALM, GNA12, DVL1, ADGRB1, RACK1, MYH9, ANAPC2	158	1051	16792	1.9213	1	0.294781	0.292748
GOTERM_BP_ALL	GO:2000026~regulation of multicellular organismal development	27	15.2542	0.00946058	RTN4R, ITGB2, PRKCZ, ZFP36L2, LFNG, RXRA, LGALS1, UBASH3B, MYC, PALM, DVL1, RACK1, TSPO, PRKACA, JAK3, SEMA6B, METRN, INSR, COL5A1, IRF1, CLCF1, ADGRB1, TCF3, ZFPM1, CARD11, DBN1, ANAPC2	158	1721	16792	1.66736	1	0.294781	0.292748
GOTERM_BP_ALL	GO:0070665~positive regulation of leukocyte proliferation	6	3.38983	0.00991708	CDKN1A, CLCF1, TCF3, RASAL3, JAK3, CARD11	158	139	16792	4.58756	1	0.306144	0.304032
GOTERM_BP_ALL	GO:0009653~anatomical structure morphogenesis	37	20.904	0.0105218	RTN4R, LST1, ITGB2, PRKCZ, SYNE3, TRIOBP, RASIP1, LFNG, RXRA, TRIM28, MYC, PALM, GNA12, BSG, DVL1, RACK1, PRKACA, JUNB, JAG2, SEMA6B, GAMT, VASP, EGFL7, METRN, DUSP1, INSR, PPP1CA, FMNL1, COL5A1, ADGRB1, ID3, MYH9, RADIL, PLCD3, ATP6V0D1, ZFPM1, ANAPC2	158	2631	16792	1.4946	1	0.321832	0.319612
GOTERM_BP_ALL	GO:0010629~negative regulation of gene expression	24	13.5593	0.0110806	HEXIM1, CDKN1A, UHRF1, DAPK1, TDRD9, NOC2L, MEX3D, ZFP36L2, AURKB, TFAP4, RXRA, TRIM28, MYC, IRF1, AGO2, RACK1, ID3, TNRC18, TCF3, CHAC1, MZF1, JUNB, ZFPM1, BAHCC1	158	1485	16792	1.71763	1	0.335844	0.333527
GOTERM_BP_ALL	GO:2000278~regulation of DNA biosynthetic process	5	2.82486	0.0112858	CDKN1A, DUSP1, RFC2, MYC, AURKB	158	93	16792	5.7139	1	0.338274	0.33594
GOTERM_BP_ALL	GO:0006915~apoptotic process	27	15.2542	0.0113637	CDKN1A, ITGB2, PTTG1IP, NOC2L, PRKCZ, AURKB, PPP3CC, LGALS1, MYC, RACK1, TSPO, E2F2, CHAC1, JAK3, JAG2, DAPK1, DUSP1, RMDN3, ATAD3A, PPP1CA, HSH2D, TFAP4, IRF1, CLCF1, DDIT4, ID3, LTBR	158	1747	16792	1.64254	1	0.338274	0.33594
GOTERM_BP_ALL	GO:0044093~positive regulation of molecular function	28	15.8192	0.011798	RTN4R, SCARB1, CDKN1A, SLC27A1, UHRF1, ITGB2, DENND3, RASAL3, RASGRP2, PRKCZ, RAPGEFL1, AURKB, LFNG, CCND3, TRIM28, MYC, RACK1, PRKACA, JAK3, DAPK1, RFC2, INSR, TBCD, ARHGAP45, TFAP4, TCF3, CARD11, ANAPC2	158	1840	16792	1.61728	1	0.34478	0.342401
GOTERM_BP_ALL	GO:1903578~regulation of ATP metabolic process	4	2.25989	0.0120296	MYC, INSR, DDIT4, TSPO	158	51	16792	8.33557	1	0.34478	0.342401
GOTERM_BP_ALL	GO:0009118~regulation of nucleoside metabolic process	4	2.25989	0.0120296	MYC, INSR, DDIT4, TSPO	158	51	16792	8.33557	1	0.34478	0.342401
GOTERM_BP_ALL	GO:0002902~regulation of B cell apoptotic process	3	1.69492	0.0120469	HSH2D, NOC2L, AURKB	158	18	16792	17.7131	1	0.34478	0.342401
GOTERM_BP_ALL	GO:1903706~regulation of hemopoiesis	9	5.08475	0.0120993	LGALS1, UBASH3B, MYC, IRF1, JAK3, PRKCZ, ZFPM1, CARD11, ZFP36L2	158	328	16792	2.91618	1	0.34478	0.342401
GOTERM_BP_ALL	GO:0010558~negative regulation of macromolecule biosynthetic process	23	12.9944	0.012701	HEXIM1, UHRF1, DAPK1, DUSP1, NOC2L, MEX3D, ZFP36L2, AURKB, TFAP4, RXRA, TRIM28, MYC, IRF1, AGO2, RACK1, ID3, TNRC18, TCF3, MZF1, JAK3, JUNB, ZFPM1, BAHCC1	158	1418	16792	1.72384	1	0.351312	0.348889
GOTERM_BP_ALL	GO:0007166~cell surface receptor signaling pathway	37	20.904	0.0130502	RTN4R, SCARB1, SLC27A1, NXN, ITGB2, PRKCZ, PRAM1, LFNG, FCGRT, MYC, BSG, DVL1, RACK1, SPIN1, CHAC1, PRKACA, JAK3, JAG2, SEMA6B, EGFL7, DAPK1, INSR, RHBDF2, MIB2, IL17RA, PPP1CA, IRF1, CLCF1, DDIT4, AGO2, PXDN, ADGRB1, MYH9, LTBR, ATP6V0D1, CARD11, LY6E	158	2669	16792	1.47332	1	0.351312	0.348889
GOTERM_BP_ALL	GO:0002285~lymphocyte activation involved in immune response	6	3.38983	0.0130748	LFNG, LGALS1, CLCF1, JAK3, PRKCZ, ZFPM1	158	149	16792	4.27967	1	0.351312	0.348889
GOTERM_BP_ALL	GO:0048731~system development	54	30.5085	0.013075	GPSM1, CDKN1A, LST1, ITGB2, RAPGEFL1, LFNG, PPP3CC, LGALS1, TRIM28, UBASH3B, MYC, BSG, PALM, TSPO, CHAC1, PRKACA, JAK3, JUNB, POLE, SEMA6B, GAMT, EGFL7, METRN, GLRX5, SLC7A5, IRF1, DDIT4, ADGRB1, ORAI1, MYH9, ATP6V0D1, ZFPM1, CARD11, DBN1, ANAPC2, RTN4R, NXN, PLD4, PRKCZ, RASIP1, ZFP36L2, RXRA, DVL1, JAG2, VASP, HEXIM1, INSR, PPP1CA, COL5A1, CLCF1, ID3, TCF3, LTBR, PLCD3	158	4291	16792	1.33746	1	0.351312	0.348889
GOTERM_BP_ALL	GO:0071214~cellular response to abiotic stimulus	8	4.51977	0.0131281	CDKN1A, MYC, IRF1, PALM, TSPO, LTBR, NOC2L, AURKB	158	268	16792	3.17249	1	0.351312	0.348889
GOTERM_BP_ALL	GO:0009896~positive regulation of catabolic process	9	5.08475	0.0131553	MYC, INSR, AGO2, DVL1, RACK1, PTTG1IP, ZFP36L2, RNF166, ANAPC2	158	333	16792	2.87239	1	0.351312	0.348889
GOTERM_BP_ALL	GO:0009968~negative regulation of signal transduction	19	10.7345	0.0132248	RTN4R, EGFL7, NXN, DAPK1, DUSP1, PTTG1IP, NOC2L, RASAL3, PRKCZ, LFNG, UBASH3B, MYC, PALM, DDIT4, PXDN, DVL1, RACK1, CHAC1, PRKACA	158	1089	16792	1.85426	1	0.351312	0.348889
GOTERM_BP_ALL	GO:0010941~regulation of cell death	24	13.5593	0.0132404	CDKN1A, DAPK1, DUSP1, PTTG1IP, NOC2L, ATAD3A, PRKCZ, AURKB, PPP1CA, HSH2D, TFAP4, LGALS1, PPP3CC, MYC, CLCF1, DDIT4, RACK1, TSPO, ID3, ATP13A2, LTBR, JAK3, JUNB, CARD11	158	1509	16792	1.69031	1	0.351312	0.348889
GOTERM_BP_ALL	GO:0051900~regulation of mitochondrial depolarization	3	1.69492	0.0133823	HSH2D, RACK1, TSPO	158	19	16792	16.7808	1	0.351312	0.348889
GOTERM_BP_ALL	GO:0051882~mitochondrial depolarization	3	1.69492	0.0133823	HSH2D, RACK1, TSPO	158	19	16792	16.7808	1	0.351312	0.348889
GOTERM_BP_ALL	GO:0010648~negative regulation of cell communication	20	11.2994	0.0144351	RTN4R, EGFL7, NXN, DAPK1, DUSP1, PTTG1IP, NOC2L, RASAL3, PRKCZ, LFNG, UBASH3B, MYC, PALM, DDIT4, PXDN, DVL1, RACK1, CHAC1, PRKACA, GRID2IP	158	1182	16792	1.79828	1	0.375011	0.372424
GOTERM_BP_ALL	GO:0045787~positive regulation of cell cycle	9	5.08475	0.01451	CCND3, CDKN1A, TFAP4, MYC, INSR, ARID3A, TCF3, PRKACA, AURKB	158	339	16792	2.82155	1	0.375011	0.372424
GOTERM_BP_ALL	GO:0001783~B cell apoptotic process	3	1.69492	0.0147789	HSH2D, NOC2L, AURKB	158	20	16792	15.9418	1	0.378972	0.376358
GOTERM_BP_ALL	GO:0023057~negative regulation of signaling	20	11.2994	0.014912	RTN4R, EGFL7, NXN, DAPK1, DUSP1, PTTG1IP, NOC2L, RASAL3, PRKCZ, LFNG, UBASH3B, MYC, PALM, DDIT4, PXDN, DVL1, RACK1, CHAC1, PRKACA, GRID2IP	158	1186	16792	1.79222	1	0.378972	0.376358
GOTERM_BP_ALL	GO:0070727~cellular macromolecule localization	25	14.1243	0.0150043	CDKN1A, ANKLE1, ITGB2, PTTG1IP, PRKCZ, SYNE3, AURKB, RPS15, PPP3CC, TRIM28, GSG2, PALM, BSG, DVL1, RACK1, TSPO, RPS11, PRKACA, JAK3, TNPO2, MEX3D, TOM1L2, RPS28, ATP13A2, DBN1	158	1613	16792	1.64722	1	0.378972	0.376358
GOTERM_BP_ALL	GO:0034470~ncRNA processing	10	5.64972	0.0152955	RPS15, CTU2, RPS28, INTS1, AGO2, DHX37, NOC4L, RPS11, TSEN54, GTPBP3	158	411	16792	2.58585	1	0.383422	0.380776
GOTERM_BP_ALL	GO:0030888~regulation of B cell proliferation	4	2.25989	0.0154809	CDKN1A, CLCF1, TCF3, CARD11	158	56	16792	7.59132	1	0.385175	0.382518
GOTERM_BP_ALL	GO:0032502~developmental process	67	37.8531	0.0156818	GPSM1, CDKN1A, LST1, ITGB2, SYNE3, TRIOBP, PCSK4, RAPGEFL1, LFNG, PPP3CC, LGALS1, TRIM28, UBASH3B, MYC, BSG, PALM, RACK1, SPIN1, TSPO, CHAC1, PRKACA, JAK3, JUNB, POLE, SEMA6B, GAMT, EGFL7, METRN, DUSP1, GLRX5, SLC7A5, IRF1, DDIT4, ADGRB1, ORAI1, MYH9, ATP6V0D1, ZFPM1, CARD11, DBN1, ANAPC2, RTN4R, NXN, PLD4, PRKCZ, RASIP1, ZFP36L2, AURKB, RXRA, DVL1, GNA12, TCFL5, JAG2, VASP, HEXIM1, INSR, TDRD9, …	158	5632	16792	1.26432	1	0.387281	0.384609
GOTERM_BP_ALL	GO:0072657~protein localization to membrane	11	6.21469	0.0167424	RPS15, RPS28, PPP3CC, PALM, ITGB2, BSG, DVL1, RACK1, RPS11, PRKCZ, SYNE3	158	489	16792	2.39072	1	0.410434	0.407603
GOTERM_BP_ALL	GO:0070228~regulation of lymphocyte apoptotic process	4	2.25989	0.0170015	HSH2D, NOC2L, JAK3, AURKB	158	58	16792	7.32955	1	0.410747	0.407914
GOTERM_BP_ALL	GO:0051881~regulation of mitochondrial membrane potential	4	2.25989	0.0170015	HSH2D, MYC, RACK1, TSPO	158	58	16792	7.32955	1	0.410747	0.407914
GOTERM_BP_ALL	GO:0022604~regulation of cell morphogenesis	12	6.77966	0.0178431	SEMA6B, RTN4R, FMNL1, METRN, GNA12, LST1, PALM, ITGB2, MYH9, SYNE3, TRIOBP, ANAPC2	158	568	16792	2.24532	1	0.427978	0.425025
GOTERM_BP_ALL	GO:0007219~Notch signaling pathway	6	3.38983	0.0181454	JAG2, LFNG, EGFL7, MYC, MIB2, CHAC1	158	162	16792	3.93624	1	0.431829	0.42885
GOTERM_BP_ALL	GO:0034660~ncRNA metabolic process	12	6.77966	0.0182627	RPS15, CTU2, RPS28, INTS1, AGO2, TDRD9, DHX37, SPIN1, NOC4L, RPS11, TSEN54, GTPBP3	158	570	16792	2.23744	1	0.431829	0.42885
GOTERM_BP_ALL	GO:0051251~positive regulation of lymphocyte activation	8	4.51977	0.0184399	CDKN1A, LGALS1, CLCF1, TCF3, RASAL3, JAK3, PRKCZ, CARD11	158	287	16792	2.96247	1	0.432947	0.429961
GOTERM_BP_ALL	GO:0009611~response to wounding	13	7.34463	0.0188976	SCARB1, ZFP36L2, LGALS1, COL5A1, UBASH3B, MYC, IRF1, GNA12, TSPO, ID3, MYH9, PRKACA, ZFPM1	158	649	16792	2.12884	1	0.440591	0.437551
GOTERM_BP_ALL	GO:0000278~mitotic cell cycle	17	9.60452	0.0191159	CDT1, CDKN1A, TTYH1, DUSP1, INSR, ARID3A, TUBB4B, TRIOBP, ZFP36L2, AURKB, TOM1L2, GSG2, TCF3, AURKAIP1, PRKACA, POLE, ANAPC2	158	968	16792	1.86646	1	0.442586	0.439533
GOTERM_BP_ALL	GO:0045862~positive regulation of proteolysis	9	5.08475	0.0194716	TFAP4, DAPK1, MYC, DVL1, RACK1, MYH9, AURKAIP1, RNF166, ANAPC2	158	358	16792	2.67181	1	0.446842	0.44376
GOTERM_BP_ALL	GO:0045859~regulation of protein kinase activity	14	7.9096	0.0195678	RTN4R, HEXIM1, CDKN1A, SLC27A1, DUSP1, INSR, ADARB1, PRKCZ, CCND3, TFAP4, UBASH3B, DVL1, RACK1, PRKACA	158	730	16792	2.03822	1	0.446842	0.44376
GOTERM_BP_ALL	GO:0043009~chordate embryonic development	12	6.77966	0.0197896	VASP, JAG2, LFNG, RXRA, TRIM28, MYC, GNA12, DVL1, MYH9, PLCD3, PRKACA, JUNB	158	577	16792	2.2103	1	0.448833	0.445736
GOTERM_BP_ALL	GO:0035556~intracellular signal transduction	36	20.339	0.0201793	RTN4R, CDKN1A, PTTG1IP, RASAL3, NOC2L, RASGRP2, PRKCZ, ZFP36L2, RAPGEFL1, AURKB, LGALS1, TRIM28, MYC, GSG2, GNA12, DVL1, RACK1, E2F2, CHAC1, PRKACA, JAK3, HEXIM1, DAPK1, RFC2, DUSP1, INSR, MIB2, ARID3A, ARHGAP45, TFAP4, CLCF1, DDIT4, AGO2, LTBR, PLCD3, CARD11	158	2657	16792	1.43998	1	0.452783	0.449659
GOTERM_BP_ALL	GO:0046777~protein autophosphorylation	7	3.9548	0.0203841	TRIM28, DAPK1, INSR, ATP13A2, PRKACA, JAK3, AURKB	158	228	16792	3.26294	1	0.452783	0.449659
GOTERM_BP_ALL	GO:0044265~cellular macromolecule catabolic process	17	9.60452	0.0204745	UHRF1, DENND3, PTTG1IP, ZFP36L2, AURKB, RPS15, LSM7, RPS28, GNA12, AGO2, DVL1, RACK1, ATP13A2, RPS11, PRKACA, RNF166, ANAPC2	158	976	16792	1.85116	1	0.452783	0.449659
GOTERM_BP_ALL	GO:0035821~modification of morphology or physiology of other organism	5	2.82486	0.0209722	GSDMD, RXRA, TFAP4, MYC, INSR	158	112	16792	4.74458	1	0.452783	0.449659
GOTERM_BP_ALL	GO:0030183~B cell differentiation	5	2.82486	0.0209722	LFNG, LGALS1, CLCF1, TCF3, JAK3	158	112	16792	4.74458	1	0.452783	0.449659
GOTERM_BP_ALL	GO:0097190~apoptotic signaling pathway	12	6.77966	0.0211721	CDKN1A, PPP3CC, TFAP4, DAPK1, DDIT4, RACK1, E2F2, PTTG1IP, LTBR, CHAC1, NOC2L, PPP1CA	158	583	16792	2.18755	1	0.452783	0.449659
GOTERM_BP_ALL	GO:0000280~nuclear division	12	6.77966	0.0211721	LFNG, TOM1L2, ANKLE1, DUSP1, TTYH1, INSR, GSG2, TDRD9, AURKAIP1, TRIOBP, AURKB, ANAPC2	158	583	16792	2.18755	1	0.452783	0.449659
GOTERM_BP_ALL	GO:0009792~embryo development ending in birth or egg hatching	12	6.77966	0.0211721	VASP, JAG2, LFNG, RXRA, TRIM28, MYC, GNA12, DVL1, MYH9, PLCD3, PRKACA, JUNB	158	583	16792	2.18755	1	0.452783	0.449659
GOTERM_BP_ALL	GO:0051321~meiotic cell cycle	7	3.9548	0.021186	LFNG, ANKLE1, DUSP1, INSR, TDRD9, SPIN1, MYH9	158	230	16792	3.23456	1	0.452783	0.449659
GOTERM_BP_ALL	GO:0051093~negative regulation of developmental process	14	7.9096	0.0213917	SEMA6B, RTN4R, LFNG, LGALS1, COL5A1, UBASH3B, MYC, IRF1, ADGRB1, TSPO, ID3, PRKACA, JAK3, ZFPM1	158	739	16792	2.01339	1	0.454267	0.451134
GOTERM_BP_ALL	GO:1901654~response to ketone	6	3.38983	0.0218474	CDKN1A, TFAP4, DUSP1, MYC, DDIT4, TSPO	158	170	16792	3.75101	1	0.458696	0.455532
GOTERM_BP_ALL	GO:0044763~single-organism cellular process	127	71.7514	0.0218754	SCARB1, SLC27A1, ANKLE1, LST1, ADARB1, NOC2L, RAPGEFL1, RPS15, CCND3, LGALS1, TRIM28, UBASH3B, FCGRT, MYC, BSG, PALM, CHAC1, RPS11, PRKACA, JUNB, BAHCC1, SEMA6B, GAMT, DAPK1, ATAD3B, ATAD3A, ARHGAP45, TOM1L2, DDIT4, ADGRB1, ORAI1, ATP6V0D1, AURKAIP1, ZFPM1, CARD11, SLC27A5, GRID2IP, ANAPC2, LY6E, RTN4R, TTYH1, CDCA4, PLD4, PTTG1IP, RASAL3, RASGRP2, PRKCZ, ZFP36L2, PTDSS2, CASKIN2, DVL1, RHPN1, TN…	158	12256	16792	1.10129	1	0.458696	0.455532
GOTERM_BP_ALL	GO:0046631~alpha-beta T cell activation	5	2.82486	0.0222153	IRF1, RASAL3, JAK3, PRKCZ, ZFPM1	158	114	16792	4.66134	1	0.462911	0.459717
GOTERM_BP_ALL	GO:0006468~protein phosphorylation	27	15.2542	0.0224671	RTN4R, CDKN1A, SLC27A1, ITGB2, ADARB1, RASAL3, PRKCZ, ZFP36L2, AURKB, CCND3, UBASH3B, TRIM28, MYC, GSG2, DVL1, RACK1, PRKACA, JAK3, HEXIM1, DAPK1, DUSP1, INSR, TFAP4, CLCF1, DDIT4, ATP13A2, LTBR	158	1852	16792	1.54942	1	0.464101	0.460899
GOTERM_BP_ALL	GO:0000902~cell morphogenesis	20	11.2994	0.0226509	SEMA6B, VASP, RTN4R, METRN, LST1, ITGB2, PRKCZ, SYNE3, TRIOBP, FMNL1, TRIM28, PALM, GNA12, DVL1, ADGRB1, MYH9, RADIL, ATP6V0D1, ZFPM1, ANAPC2	158	1240	16792	1.71417	1	0.464101	0.460899
GOTERM_BP_ALL	GO:0043043~peptide biosynthetic process	13	7.34463	0.0228208	DAPK1, MEX3D, ZFP36L2, PPP1CA, RPS15, MRPL4, RPS28, RXRA, AGO2, RACK1, CHAC1, AURKAIP1, RPS11	158	667	16792	2.07139	1	0.464101	0.460899
GOTERM_BP_ALL	GO:0007369~gastrulation	6	3.38983	0.0228292	COL5A1, DUSP1, ITGB2, DVL1, RACK1, PRKACA	158	172	16792	3.70739	1	0.464101	0.460899
GOTERM_BP_ALL	GO:0007050~cell cycle arrest	7	3.9548	0.0232198	CDKN1A, TFAP4, DUSP1, MYC, IRF1, ARID3A, PRKACA	158	235	16792	3.16574	1	0.46918	0.465943
GOTERM_BP_ALL	GO:0044707~single-multicellular organism process	69	38.9831	0.0237869	GPSM1, SCARB1, CDKN1A, SLC27A1, LST1, ITGB2, RAPGEFL1, RPS15, LFNG, PPP3CC, LGALS1, TRIM28, UBASH3B, MYC, BSG, PALM, RACK1, SPIN1, TSPO, CHAC1, RPS11, PRKACA, JAK3, JUNB, POLE, SEMA6B, GAMT, EGFL7, METRN, DUSP1, GLRX5, IL17RA, SLC7A5, IRF1, DDIT4, ADGRB1, ORAI1, MYH9, ATP6V0D1, ZFPM1, CARD11, DBN1, ANAPC2, RTN4R, NXN, PLD4, PRKCZ, RASIP1, ZFP36L2, AURKB, RXRA, DVL1, GNA12, TCFL5, JAG2, GSDMD, VAS…	158	5943	16792	1.23392	1	0.477744	0.474448
GOTERM_BP_ALL	GO:0051247~positive regulation of protein metabolic process	23	12.9944	0.0240467	CDKN1A, SLC27A1, UHRF1, DAPK1, INSR, PTTG1IP, PRKCZ, CCND3, TFAP4, RXRA, MYC, CLCF1, IRF1, DVL1, RACK1, MYH9, LTBR, AURKAIP1, PRKACA, ZFPM1, CARD11, RNF166, ANAPC2	158	1508	16792	1.62096	1	0.480069	0.476757
GOTERM_BP_ALL	GO:0045992~negative regulation of embryonic development	3	1.69492	0.0243742	LFNG, COL5A1, PRKACA	158	26	16792	12.2629	1	0.483711	0.480374
GOTERM_BP_ALL	GO:0034613~cellular protein localization	24	13.5593	0.0246815	CDKN1A, ANKLE1, ITGB2, PTTG1IP, PRKCZ, SYNE3, AURKB, RPS15, TOM1L2, RPS28, PPP3CC, TRIM28, GSG2, PALM, BSG, DVL1, RACK1, TSPO, ATP13A2, RPS11, PRKACA, JAK3, TNPO2, DBN1	158	1600	16792	1.59418	1	0.486913	0.483554
GOTERM_BP_ALL	GO:0071840~cellular component organization or biogenesis	72	40.678	0.0249665	SCARB1, CDKN1A, ANKLE1, LST1, ITGB2, MUM1, NOC2L, SYNE3, TRIOBP, MRPL4, RPS15, LFNG, PPP3CC, LGALS1, TRIM28, MYC, GSG2, BSG, PALM, RACK1, SPIN1, TSPO, RPS11, PRKACA, TNPO2, POLE, BAHCC1, SEMA6B, METRN, DUSP1, RFC2, POLRMT, TOM1L2, DDIT4, PXDN, ADGRB1, MYH9, ATP6V0D1, AURKAIP1, ZFPM1, PTMA, DBN1, ANAPC2, PLEC, RTN4R, TTYH1, UHRF1, NOC4L, RASGRP2, PRKCZ, AURKB, NCLN, RXRA, DVL1, GNA12, DHX37, TNRC1…	158	6265	16792	1.2214	1	0.489637	0.486259
GOTERM_BP_ALL	GO:0034644~cellular response to UV	4	2.25989	0.0258184	CDKN1A, MYC, NOC2L, AURKB	158	68	16792	6.25168	1	0.502076	0.498612
GOTERM_BP_ALL	GO:0043393~regulation of protein binding	6	3.38983	0.0259019	LFNG, DVL1, PRKACA, ZFPM1, AURKB, PPP1CA	158	178	16792	3.58242	1	0.502076	0.498612
GOTERM_BP_ALL	GO:0050789~regulation of biological process	115	64.9718	0.0261728	SCARB1, SLC27A1, ANKLE1, LST1, ADARB1, NOC2L, RAPGEFL1, CCND3, LGALS1, TRIM28, UBASH3B, FCGRT, MYC, BSG, PALM, CHAC1, PRKACA, JUNB, BAHCC1, SEMA6B, GAMT, DAPK1, ATAD3A, ARHGAP45, TOM1L2, DDIT4, ADGRB1, ORAI1, ATP6V0D1, MZF1, AURKAIP1, ZFPM1, CARD11, GRID2IP, ANAPC2, LY6E, RTN4R, TTYH1, PTTG1IP, RASAL3, RASGRP2, PRKCZ, ZFP36L2, CASKIN2, DVL1, RHPN1, TNRC18, HEXIM1, JAG2, GSDMD, VASP, CDT1, INSR, T…	158	10922	16792	1.11903	1	0.504394	0.500914
GOTERM_BP_ALL	GO:0002696~positive regulation of leukocyte activation	8	4.51977	0.0271092	CDKN1A, LGALS1, CLCF1, TCF3, RASAL3, JAK3, PRKCZ, CARD11	158	311	16792	2.73385	1	0.519437	0.515853
GOTERM_BP_ALL	GO:0010942~positive regulation of cell death	12	6.77966	0.027423	CDKN1A, PPP3CC, TFAP4, DUSP1, DAPK1, MYC, DDIT4, RACK1, TSPO, ID3, LTBR, PPP1CA	158	607	16792	2.10106	1	0.522448	0.518844
GOTERM_BP_ALL	GO:0008593~regulation of Notch signaling pathway	4	2.25989	0.027825	JAG2, LFNG, EGFL7, CHAC1	158	70	16792	6.07306	1	0.527093	0.523457
GOTERM_BP_ALL	GO:0016477~cell migration	19	10.7345	0.0281035	SEMA6B, SCARB1, INSR, ITGB2, ADARB1, PRKCZ, IL17RA, SLC7A5, FMNL1, TMEM201, COL5A1, MYC, BSG, DDIT4, GNA12, RACK1, TSPO, MYH9, JAK3	158	1184	16792	1.70548	1	0.529362	0.52571
GOTERM_BP_ALL	GO:0051960~regulation of nervous system development	14	7.9096	0.0284001	SEMA6B, RTN4R, METRN, LGALS1, MYC, CLCF1, PALM, DVL1, ADGRB1, TSPO, TCF3, PRKACA, DBN1, ANAPC2	158	769	16792	1.93485	1	0.531943	0.528273
GOTERM_BP_ALL	GO:1902580~single-organism cellular localization	18	10.1695	0.0287716	CDKN1A, ITGB2, PTTG1IP, PRKCZ, SYNE3, RPS15, TMEM201, RPS28, PPP3CC, TRIM28, PALM, BSG, DVL1, RACK1, MYH9, RPS11, JAK3, TNPO2	158	1102	16792	1.73595	1	0.535891	0.532194
GOTERM_BP_ALL	GO:0048518~positive regulation of biological process	62	35.0282	0.0293567	SCARB1, CDKN1A, SLC27A1, ANKLE1, ITGB2, ADARB1, TRIOBP, LFNG, CCND3, PPP3CC, LGALS1, TRIM28, MYC, PALM, RACK1, SPIN1, TSPO, PRKACA, JAK3, JUNB, SEMA6B, EGFL7, METRN, DUSP1, DAPK1, RFC2, IL17RA, HSH2D, IRF1, DDIT4, ADGRB1, ORAI1, MYH9, MZF1, AURKAIP1, ZFPM1, RNF166, CARD11, ANAPC2, UHRF1, PTTG1IP, RASAL3, PRKCZ, ZFP36L2, AURKB, RXRA, DVL1, JAG2, GSDMD, VASP, HEXIM1, INSR, MIB2, ARID3A, PPP1CA, TFA…	158	5285	16792	1.24679	1	0.541507	0.537771
GOTERM_BP_ALL	GO:0050790~regulation of catalytic activity	32	18.0791	0.029398	GPSM1, RTN4R, SCARB1, CDKN1A, SLC27A1, UHRF1, DENND3, ADARB1, RASAL3, RASGRP2, PRKCZ, RASIP1, RAPGEFL1, AURKB, CCND3, UBASH3B, MYC, PALM, DVL1, RACK1, PRKACA, JAK3, HEXIM1, DAPK1, RFC2, DUSP1, INSR, TBCD, ARHGAP45, TFAP4, ATP13A2, ANAPC2	158	2357	16792	1.4429	1	0.541507	0.537771
GOTERM_BP_ALL	GO:0070227~lymphocyte apoptotic process	4	2.25989	0.0299124	HSH2D, NOC2L, JAK3, AURKB	158	72	16792	5.90436	1	0.54329	0.539542
GOTERM_BP_ALL	GO:0046634~regulation of alpha-beta T cell activation	4	2.25989	0.0299124	IRF1, RASAL3, JAK3, PRKCZ	158	72	16792	5.90436	1	0.54329	0.539542
GOTERM_BP_ALL	GO:0016043~cellular component organization	70	39.548	0.0299836	SCARB1, CDKN1A, ANKLE1, LST1, ITGB2, MUM1, NOC2L, SYNE3, TRIOBP, MRPL4, RPS15, LFNG, PPP3CC, LGALS1, TRIM28, MYC, GSG2, BSG, PALM, RACK1, SPIN1, TSPO, RPS11, PRKACA, TNPO2, POLE, BAHCC1, SEMA6B, METRN, DUSP1, RFC2, POLRMT, TOM1L2, DDIT4, PXDN, ADGRB1, MYH9, ATP6V0D1, AURKAIP1, ZFPM1, PTMA, DBN1, ANAPC2, PLEC, RTN4R, TTYH1, UHRF1, RASGRP2, PRKCZ, AURKB, NCLN, RXRA, DVL1, GNA12, TNRC18, GSDMD, VASP…	158	6109	16792	1.21779	1	0.54329	0.539542
GOTERM_BP_ALL	GO:0048585~negative regulation of response to stimulus	21	11.8644	0.0305571	SEMA6B, RTN4R, EGFL7, NXN, DAPK1, DUSP1, PTTG1IP, NOC2L, RASAL3, PRKCZ, LFNG, UBASH3B, MYC, PALM, DDIT4, PXDN, DVL1, RACK1, CHAC1, PRKACA, JAK3	158	1369	16792	1.63028	1	0.550689	0.54689
GOTERM_BP_ALL	GO:0050867~positive regulation of cell activation	8	4.51977	0.030976	CDKN1A, LGALS1, CLCF1, TCF3, RASAL3, JAK3, PRKCZ, CARD11	158	320	16792	2.65696	1	0.552065	0.548256
GOTERM_BP_ALL	GO:0043933~macromolecular complex subunit organization	33	18.6441	0.0310528	SCARB1, UHRF1, MUM1, NOC2L, PRKCZ, TRIOBP, AURKB, RPS15, MRPL4, RXRA, TRIM28, MYC, GSG2, DVL1, RACK1, SPIN1, TNRC18, TNPO2, BAHCC1, VASP, GSDMD, TMEM120B, INSR, TBCD, PPP1CA, RPS28, TFAP4, COL5A1, DDIT4, AGO2, AURKAIP1, ZFPM1, PTMA	158	2461	16792	1.42511	1	0.552065	0.548256
GOTERM_BP_ALL	GO:0050864~regulation of B cell activation	5	2.82486	0.0313843	CDKN1A, CLCF1, TCF3, CARD11, ZFP36L2	158	127	16792	4.18419	1	0.552065	0.548256
GOTERM_BP_ALL	GO:1901566~organonitrogen compound biosynthetic process	21	11.8644	0.0317979	GAMT, SLC27A1, DAPK1, MEX3D, PFAS, ZFP36L2, PPP1CA, RPS15, MRPL4, PTDSS2, RPS28, RXRA, CHST12, MYC, PALM, AGO2, RACK1, TSPO, CHAC1, AURKAIP1, RPS11	158	1375	16792	1.62316	1	0.552065	0.548256
GOTERM_BP_ALL	GO:0045746~negative regulation of Notch signaling pathway	3	1.69492	0.0318431	LFNG, EGFL7, CHAC1	158	30	16792	10.6278	1	0.552065	0.548256
GOTERM_BP_ALL	GO:0001893~maternal placenta development	3	1.69492	0.0318431	RXRA, BSG, JUNB	158	30	16792	10.6278	1	0.552065	0.548256
GOTERM_BP_ALL	GO:0048285~organelle fission	12	6.77966	0.0319528	LFNG, TOM1L2, ANKLE1, DUSP1, TTYH1, INSR, GSG2, TDRD9, AURKAIP1, TRIOBP, AURKB, ANAPC2	158	622	16792	2.05039	1	0.552065	0.548256
GOTERM_BP_ALL	GO:0006820~anion transport	10	5.64972	0.0319582	SLC7A5, SLC27A1, RXRA, SLC43A2, TTYH1, SLCO4A1, MYC, BSG, TSPO, SLC27A5	158	468	16792	2.27091	1	0.552065	0.548256
GOTERM_BP_ALL	GO:0006413~translational initiation	6	3.38983	0.0322329	RPS15, RPS28, RXRA, AGO2, RPS11, PPP1CA	158	189	16792	3.37392	1	0.553941	0.55012
GOTERM_BP_ALL	GO:1901700~response to oxygen-containing compound	22	12.4294	0.0324264	SCARB1, CDKN1A, SLC27A1, DUSP1, INSR, PRKCZ, ZFP36L2, TFAP4, RXRA, LGALS1, MYC, GNG7, BSG, DDIT4, RACK1, TSPO, ID3, LTBR, ATP6V0D1, PRKACA, JAK3, JUNB	158	1466	16792	1.5949	1	0.554409	0.550584
GOTERM_BP_ALL	GO:0051129~negative regulation of cellular component organization	12	6.77966	0.0325949	SEMA6B, RTN4R, TOM1L2, LGALS1, DUSP1, TBCD, RACK1, TSPO, AURKAIP1, NOC2L, PRKCZ, TRIOBP	158	624	16792	2.04382	1	0.554446	0.550621
GOTERM_BP_ALL	GO:0072332~intrinsic apoptotic signaling pathway by p53 class mediator	4	2.25989	0.0331943	CDKN1A, DDIT4, E2F2, PTTG1IP	158	75	16792	5.66819	1	0.560664	0.556796
GOTERM_BP_ALL	GO:0043085~positive regulation of catalytic activity	23	12.9944	0.0333059	RTN4R, SCARB1, CDKN1A, SLC27A1, UHRF1, DAPK1, RFC2, INSR, TBCD, DENND3, RASGRP2, RASAL3, PRKCZ, RAPGEFL1, AURKB, ARHGAP45, CCND3, TFAP4, MYC, RACK1, PRKACA, JAK3, ANAPC2	158	1559	16792	1.56793	1	0.560664	0.556796
GOTERM_BP_ALL	GO:0043549~regulation of kinase activity	14	7.9096	0.0336345	RTN4R, HEXIM1, CDKN1A, SLC27A1, DUSP1, INSR, ADARB1, PRKCZ, CCND3, TFAP4, UBASH3B, DVL1, RACK1, PRKACA	158	788	16792	1.8882	1	0.560664	0.556796
GOTERM_BP_ALL	GO:0045736~negative regulation of cyclin-dependent protein serine/threonine kinase activity	3	1.69492	0.033834	HEXIM1, CDKN1A, TFAP4	158	31	16792	10.285	1	0.560664	0.556796
GOTERM_BP_ALL	GO:1904030~negative regulation of cyclin-dependent protein kinase activity	3	1.69492	0.033834	HEXIM1, CDKN1A, TFAP4	158	31	16792	10.285	1	0.560664	0.556796
GOTERM_BP_ALL	GO:0030162~regulation of proteolysis	13	7.34463	0.0339695	DAPK1, TFAP4, MYC, GNA12, DVL1, RACK1, MYH9, ATP13A2, CHAC1, AURKAIP1, PRKACA, RNF166, ANAPC2	158	708	16792	1.95144	1	0.560664	0.556796
GOTERM_BP_ALL	GO:0001701~in utero embryonic development	8	4.51977	0.0361863	JAG2, RXRA, TRIM28, MYC, GNA12, MYH9, PLCD3, JUNB	158	331	16792	2.56866	1	0.588328	0.584269
GOTERM_BP_ALL	GO:0015711~organic anion transport	8	4.51977	0.0361863	SLC7A5, SLC27A1, RXRA, SLC43A2, SLCO4A1, MYC, BSG, SLC27A5	158	331	16792	2.56866	1	0.588328	0.584269
GOTERM_BP_ALL	GO:0002573~myeloid leukocyte differentiation	6	3.38983	0.0364123	UBASH3B, MYC, MYH9, LTBR, ZFPM1, JUNB	158	195	16792	3.27011	1	0.588328	0.584269
GOTERM_BP_ALL	GO:0031399~regulation of protein modification process	24	13.5593	0.0365306	RTN4R, HEXIM1, CDKN1A, SLC27A1, NXN, DUSP1, INSR, ITGB2, ADARB1, PTTG1IP, NOC2L, PRKCZ, CCND3, TFAP4, UBASH3B, MYC, CLCF1, DDIT4, DVL1, RACK1, TSPO, LTBR, PRKACA, ANAPC2	158	1664	16792	1.53286	1	0.588328	0.584269
GOTERM_BP_ALL	GO:0043434~response to peptide hormone	9	5.08475	0.0367382	SLC27A1, MYC, GNG7, INSR, BSG, ATP6V0D1, PRKACA, JAK3, PRKCZ	158	405	16792	2.36174	1	0.588328	0.584269
GOTERM_BP_ALL	GO:0006659~phosphatidylserine biosynthetic process	2	1.12994	0.0368808	PTDSS2, SLC27A1	158	4	16792	53.1392	1	0.588328	0.584269
GOTERM_BP_ALL	GO:2000664~positive regulation of interleukin-5 secretion	2	1.12994	0.0368808	PRKCZ, IL17RA	158	4	16792	53.1392	1	0.588328	0.584269
GOTERM_BP_ALL	GO:0042981~regulation of apoptotic process	21	11.8644	0.0373806	CDKN1A, DAPK1, DUSP1, PTTG1IP, NOC2L, ATAD3A, PRKCZ, AURKB, PPP1CA, HSH2D, TFAP4, LGALS1, PPP3CC, MYC, CLCF1, RACK1, TSPO, ID3, LTBR, JAK3, CARD11	158	1400	16792	1.59418	1	0.593461	0.589367
GOTERM_BP_ALL	GO:0019538~protein metabolic process	63	35.5932	0.0379297	CDKN1A, SLC27A1, ITGB2, ADARB1, NOC2L, TRIOBP, PCSK4, MRPL4, RPS15, CCND3, PPP3CC, TRIM28, UBASH3B, MYC, GSG2, RACK1, TSPO, CHAC1, RPS11, PRKACA, JAK3, DUSP1, DAPK1, GLRX5, RHBDF2, CTU2, IRF1, DDIT4, MYH9, AURKAIP1, ZFPM1, RNF166, CARD11, ANAPC2, RTN4R, UHRF1, NXN, DENND3, PTTG1IP, RASAL3, PRKCZ, ZFP36L2, AURKB, DPP7, RXRA, MGAT5B, DVL1, GNA12, LONRF1, CPA6, JAG2, HEXIM1, INSR, MIB2, MEX3D, KBTBD…	158	5457	16792	1.22696	1	0.595836	0.591726
GOTERM_BP_ALL	GO:0006110~regulation of glycolytic process	3	1.69492	0.0379569	MYC, INSR, DDIT4	158	33	16792	9.66168	1	0.595836	0.591726
GOTERM_BP_ALL	GO:0045596~negative regulation of cell differentiation	12	6.77966	0.0380663	SEMA6B, RTN4R, LGALS1, COL5A1, UBASH3B, MYC, IRF1, TSPO, ID3, JAK3, ZFPM1, ZFP36L2	158	640	16792	1.99272	1	0.595836	0.591726
GOTERM_BP_ALL	GO:0006412~translation	12	6.77966	0.0384284	RPS15, MRPL4, RPS28, RXRA, DAPK1, AGO2, RACK1, MEX3D, AURKAIP1, RPS11, ZFP36L2, PPP1CA	158	641	16792	1.98961	1	0.598693	0.594563
GOTERM_BP_ALL	GO:1903707~negative regulation of hemopoiesis	5	2.82486	0.0388599	UBASH3B, MYC, IRF1, JAK3, ZFPM1	158	136	16792	3.9073	1	0.6026	0.598442
GOTERM_BP_ALL	GO:0044764~multi-organism cellular process	16	9.03955	0.0390613	GSDMD, SCARB1, INSR, ADARB1, RPS15, RPS28, TFAP4, RXRA, LGALS1, TRIM28, MYC, IRF1, DDIT4, RACK1, LTBR, RPS11	158	973	16792	1.74764	1	0.602919	0.59876
GOTERM_BP_ALL	GO:0032989~cellular component morphogenesis	20	11.2994	0.0396483	SEMA6B, VASP, RTN4R, METRN, LST1, ITGB2, PRKCZ, SYNE3, TRIOBP, FMNL1, TRIM28, PALM, GNA12, DVL1, ADGRB1, MYH9, RADIL, ATP6V0D1, ZFPM1, ANAPC2	158	1321	16792	1.60906	1	0.605116	0.600942
GOTERM_BP_ALL	GO:0051100~negative regulation of binding	5	2.82486	0.0397482	TFAP4, DVL1, ZFPM1, AURKB, PPP1CA	158	137	16792	3.87878	1	0.605116	0.600942
GOTERM_BP_ALL	GO:0015718~monocarboxylic acid transport	5	2.82486	0.0397482	SLC27A1, RXRA, MYC, BSG, SLC27A5	158	137	16792	3.87878	1	0.605116	0.600942
GOTERM_BP_ALL	GO:0043067~regulation of programmed cell death	21	11.8644	0.0405572	CDKN1A, DAPK1, DUSP1, PTTG1IP, NOC2L, ATAD3A, PRKCZ, AURKB, PPP1CA, HSH2D, TFAP4, LGALS1, PPP3CC, MYC, CLCF1, RACK1, TSPO, ID3, LTBR, JAK3, CARD11	158	1413	16792	1.57951	1	0.613201	0.60897
GOTERM_BP_ALL	GO:0050794~regulation of cellular process	110	62.1469	0.0406471	SCARB1, SLC27A1, ANKLE1, LST1, ADARB1, NOC2L, RAPGEFL1, CCND3, LGALS1, TRIM28, UBASH3B, FCGRT, MYC, BSG, PALM, CHAC1, PRKACA, JUNB, BAHCC1, SEMA6B, DAPK1, ATAD3A, ARHGAP45, TOM1L2, DDIT4, ADGRB1, ATP6V0D1, MZF1, AURKAIP1, ZFPM1, CARD11, GRID2IP, ANAPC2, LY6E, RTN4R, PTTG1IP, RASAL3, RASGRP2, PRKCZ, ZFP36L2, CASKIN2, DVL1, RHPN1, TNRC18, HEXIM1, JAG2, GSDMD, VASP, CDT1, INSR, TBCD, MEX3D, COL5A1, …	158	10489	16792	1.11456	1	0.613201	0.60897
GOTERM_BP_ALL	GO:0007346~regulation of mitotic cell cycle	10	5.64972	0.0413438	TOM1L2, CDKN1A, DUSP1, MYC, INSR, ARID3A, TCF3, AURKAIP1, ZFP36L2, ANAPC2	158	491	16792	2.16453	1	0.620902	0.616618
GOTERM_BP_ALL	GO:0051054~positive regulation of DNA metabolic process	6	3.38983	0.0415938	TRIM28, RFC2, MYC, CLCF1, INSR, AURKB	158	202	16792	3.15679	1	0.621856	0.617566
GOTERM_BP_ALL	GO:0048870~cell motility	20	11.2994	0.0419996	JAG2, SEMA6B, SCARB1, INSR, ITGB2, ADARB1, PRKCZ, IL17RA, SLC7A5, FMNL1, TMEM201, COL5A1, MYC, BSG, DDIT4, GNA12, RACK1, TSPO, MYH9, JAK3	158	1330	16792	1.59817	1	0.622341	0.618047
GOTERM_BP_ALL	GO:0051674~localization of cell	20	11.2994	0.0419996	JAG2, SEMA6B, SCARB1, INSR, ITGB2, ADARB1, PRKCZ, IL17RA, SLC7A5, FMNL1, TMEM201, COL5A1, MYC, BSG, DDIT4, GNA12, RACK1, TSPO, MYH9, JAK3	158	1330	16792	1.59817	1	0.622341	0.618047
GOTERM_BP_ALL	GO:0045619~regulation of lymphocyte differentiation	5	2.82486	0.0426165	IRF1, JAK3, PRKCZ, CARD11, ZFP36L2	158	140	16792	3.79566	1	0.626151	0.621831
GOTERM_BP_ALL	GO:2000106~regulation of leukocyte apoptotic process	4	2.25989	0.0428201	HSH2D, NOC2L, JAK3, AURKB	158	83	16792	5.12185	1	0.626151	0.621831
GOTERM_BP_ALL	GO:0032091~negative regulation of protein binding	4	2.25989	0.0428201	DVL1, ZFPM1, AURKB, PPP1CA	158	83	16792	5.12185	1	0.626151	0.621831
GOTERM_BP_ALL	GO:0043604~amide biosynthetic process	13	7.34463	0.0435447	DAPK1, MEX3D, ZFP36L2, PPP1CA, RPS15, MRPL4, RPS28, RXRA, AGO2, RACK1, CHAC1, AURKAIP1, RPS11	158	736	16792	1.8772	1	0.626343	0.622022
GOTERM_BP_ALL	GO:1990138~neuron projection extension	5	2.82486	0.0435523	SEMA6B, RTN4R, DVL1, PRKCZ, ANAPC2	158	141	16792	3.76874	1	0.626343	0.622022
GOTERM_BP_ALL	GO:0060560~developmental growth involved in morphogenesis	6	3.38983	0.0435847	SEMA6B, RTN4R, TRIM28, DVL1, PRKCZ, ANAPC2	158	205	16792	3.11059	1	0.626343	0.622022
GOTERM_BP_ALL	GO:1900542~regulation of purine nucleotide metabolic process	6	3.38983	0.0435847	MYC, INSR, PALM, DDIT4, RACK1, TSPO	158	205	16792	3.11059	1	0.626343	0.622022
GOTERM_BP_ALL	GO:0000956~nuclear-transcribed mRNA catabolic process	6	3.38983	0.0443878	RPS15, RPS28, LSM7, AGO2, RPS11, ZFP36L2	158	206	16792	3.09549	1	0.63426	0.629884
GOTERM_BP_ALL	GO:0043068~positive regulation of programmed cell death	11	6.21469	0.0446783	CDKN1A, PPP3CC, TFAP4, DUSP1, DAPK1, MYC, RACK1, TSPO, ID3, LTBR, PPP1CA	158	577	16792	2.02611	1	0.63426	0.629884
GOTERM_BP_ALL	GO:0046942~carboxylic acid transport	7	3.9548	0.0447064	SLC7A5, SLC27A1, RXRA, SLC43A2, MYC, BSG, SLC27A5	158	275	16792	2.70527	1	0.63426	0.629884
GOTERM_BP_ALL	GO:0051384~response to glucocorticoid	5	2.82486	0.0457221	CDKN1A, TFAP4, DUSP1, DDIT4, ZFP36L2	158	143	16792	3.71603	1	0.642294	0.637863
GOTERM_BP_ALL	GO:0019087~transformation of host cell by virus	2	1.12994	0.0458878	MYC, INSR	158	5	16792	42.5114	1	0.642294	0.637863
GOTERM_BP_ALL	GO:0006259~DNA metabolic process	16	9.03955	0.0459574	CDT1, CDKN1A, ANKLE1, UHRF1, DUSP1, RFC2, INSR, TDRD9, MUM1, AURKB, TRIM28, MYC, CLCF1, ID3, TCF3, POLE	158	995	16792	1.709	1	0.642294	0.637863
GOTERM_BP_ALL	GO:0006396~RNA processing	15	8.47458	0.0460433	INTS1, TDRD9, NOC4L, ADARB1, TSEN54, GTPBP3, RPS15, CTU2, LSM7, RPS28, AGO2, DHX37, AURKAIP1, RPS11, PRKACA	158	910	16792	1.75184	1	0.642294	0.637863
GOTERM_BP_ALL	GO:1901701~cellular response to oxygen-containing compound	15	8.47458	0.0467432	SCARB1, INSR, PRKCZ, ZFP36L2, TFAP4, LGALS1, MYC, GNG7, DDIT4, RACK1, TSPO, ID3, ATP6V0D1, PRKACA, JAK3	158	912	16792	1.748	1	0.646769	0.642307
GOTERM_BP_ALL	GO:0042100~B cell proliferation	4	2.25989	0.046752	CDKN1A, CLCF1, TCF3, CARD11	158	86	16792	4.94319	1	0.646769	0.642307
GOTERM_BP_ALL	GO:0097193~intrinsic apoptotic signaling pathway	7	3.9548	0.0473644	CDKN1A, DDIT4, RACK1, E2F2, PTTG1IP, CHAC1, NOC2L	158	279	16792	2.66649	1	0.648523	0.644049
GOTERM_BP_ALL	GO:0001890~placenta development	5	2.82486	0.0474241	RXRA, TRIM28, BSG, PLCD3, JUNB	158	145	16792	3.66478	1	0.648523	0.644049
GOTERM_BP_ALL	GO:0065007~biological regulation	119	67.2316	0.0474624	SCARB1, SLC27A1, ANKLE1, LST1, ADARB1, NOC2L, RAPGEFL1, CCND3, LGALS1, TRIM28, UBASH3B, FCGRT, MYC, BSG, PALM, CHAC1, PRKACA, JUNB, BAHCC1, SEMA6B, GAMT, DAPK1, ATAD3A, ARHGAP45, TOM1L2, DDIT4, ADGRB1, ORAI1, ATP6V0D1, MZF1, AURKAIP1, ZFPM1, CARD11, GRID2IP, ANAPC2, LY6E, RTN4R, TTYH1, PTTG1IP, RASAL3, RASGRP2, PRKCZ, ZFP36L2, CASKIN2, DVL1, RHPN1, TNRC18, HEXIM1, JAG2, GSDMD, VASP, CDT1, INSR, T…	158	11548	16792	1.09518	1	0.648523	0.644049
GOTERM_BP_ALL	GO:0040011~locomotion	22	12.4294	0.047803	JAG2, SEMA6B, VASP, SCARB1, INSR, ITGB2, ADARB1, PRKCZ, IL17RA, SLC7A5, FMNL1, TMEM201, COL5A1, MYC, BSG, DDIT4, GNA12, DVL1, RACK1, TSPO, MYH9, JAK3	158	1530	16792	1.52819	1	0.649266	0.644787
GOTERM_BP_ALL	GO:2000379~positive regulation of reactive oxygen species metabolic process	4	2.25989	0.048101	CDKN1A, INSR, ITGB2, TSPO	158	87	16792	4.88637	1	0.649266	0.644787
GOTERM_BP_ALL	GO:0046632~alpha-beta T cell differentiation	4	2.25989	0.048101	IRF1, JAK3, PRKCZ, ZFPM1	158	87	16792	4.88637	1	0.649266	0.644787
GOTERM_BP_ALL	GO:0019048~modulation by virus of host morphology or physiology	3	1.69492	0.0490386	RXRA, MYC, INSR	158	38	16792	8.39041	1	0.651896	0.647399
GOTERM_BP_ALL	GO:0006140~regulation of nucleotide metabolic process	6	3.38983	0.0490775	MYC, INSR, PALM, DDIT4, RACK1, TSPO	158	212	16792	3.00788	1	0.651896	0.647399
GOTERM_BP_ALL	GO:0002366~leukocyte activation involved in immune response	6	3.38983	0.0490775	LFNG, LGALS1, CLCF1, JAK3, PRKCZ, ZFPM1	158	212	16792	3.00788	1	0.651896	0.647399
GOTERM_BP_ALL	GO:0017148~negative regulation of translation	5	2.82486	0.0494397	DAPK1, AGO2, RACK1, MEX3D, ZFP36L2	158	147	16792	3.61491	1	0.651896	0.647399
GOTERM_BP_ALL	GO:0061136~regulation of proteasomal protein catabolic process	5	2.82486	0.0494397	GNA12, DVL1, RACK1, PRKACA, RNF166	158	147	16792	3.61491	1	0.651896	0.647399
GOTERM_BP_ALL	GO:0043467~regulation of generation of precursor metabolites and energy	4	2.25989	0.049469	MYC, INSR, DDIT4, PPP1CA	158	88	16792	4.83084	1	0.651896	0.647399
GOTERM_BP_ALL	GO:0007067~mitotic nuclear division	9	5.08475	0.0497476	TOM1L2, DUSP1, TTYH1, INSR, GSG2, AURKAIP1, TRIOBP, AURKB, ANAPC2	158	431	16792	2.21927	1	0.652986	0.648482

## Sheet: SUPER.EB12
Category	Term	Count	%	PValue	Genes	List Total	Pop Hits	Pop Total	Fold Enrichment	Bonferroni	Benjamini	FDR
GOTERM_BP_ALL	GO:0001893~maternal placenta development	4	5.88235	0.00015636	RXRA, BSG, JUNB, CTSB	60	30	16792	37.3156	0.214381	0.241264	0.241264
GOTERM_BP_ALL	GO:0060135~maternal process involved in female pregnancy	4	5.88235	0.00116471	RXRA, BSG, JUNB, CTSB	60	59	16792	18.974	0.834401	0.854052	0.854052
GOTERM_BP_ALL	GO:0001890~placenta development	5	7.35294	0.00167976	RXRA, BSG, PLCD3, JUNB, CTSB	60	145	16792	9.65057	0.925283	0.854052	0.854052
GOTERM_BP_ALL	GO:0046697~decidualization	3	4.41176	0.002214	BSG, JUNB, CTSB	60	20	16792	41.98	0.967287	0.854052	0.854052
GOTERM_BP_ALL	GO:0008360~regulation of cell shape	4	5.88235	0.0144126	FMNL1, GNA12, PALM, MYH9	60	145	16792	7.72046	1	1	1
GOTERM_BP_ALL	GO:0043009~chordate embryonic development	7	10.2941	0.0154761	LFNG, RXRA, GNA12, DVL1, MYH9, PLCD3, JUNB	60	577	16792	3.39526	1	1	1
GOTERM_BP_ALL	GO:0048608~reproductive structure development	6	8.82353	0.0155474	LFNG, RXRA, BSG, PLCD3, JUNB, CTSB	60	418	16792	4.01722	1	1	1
GOTERM_BP_ALL	GO:0009792~embryo development ending in birth or egg hatching	7	10.2941	0.0162086	LFNG, RXRA, GNA12, DVL1, MYH9, PLCD3, JUNB	60	583	16792	3.36032	1	1	1
GOTERM_BP_ALL	GO:0061458~reproductive system development	6	8.82353	0.016288	LFNG, RXRA, BSG, PLCD3, JUNB, CTSB	60	423	16792	3.96974	1	1	1
GOTERM_BP_ALL	GO:0072359~circulatory system development	9	13.2353	0.0169529	HEXIM1, EGFL7, RXRA, COL5A1, DVL1, ADGRB1, MYH9, PLCD3, JUNB	60	945	16792	2.6654	1	1	1
GOTERM_BP_ALL	GO:0072358~cardiovascular system development	9	13.2353	0.0169529	HEXIM1, EGFL7, RXRA, COL5A1, DVL1, ADGRB1, MYH9, PLCD3, JUNB	60	945	16792	2.6654	1	1	1
GOTERM_BP_ALL	GO:0044265~cellular macromolecule catabolic process	9	13.2353	0.0201889	RPS15, LSM7, UHRF1, GNA12, AGO2, DVL1, DENND3, RNF166, CTSB	60	976	16792	2.58074	1	1	1
GOTERM_BP_ALL	GO:0003006~developmental process involved in reproduction	7	10.2941	0.023753	LFNG, RXRA, BSG, PLCD3, JUNB, PCSK4, CTSB	60	636	16792	3.08029	1	1	1
GOTERM_BP_ALL	GO:0044702~single organism reproductive process	10	14.7059	0.027015	GAMT, LFNG, RXRA, ANKLE1, BSG, MYH9, PLCD3, JUNB, PCSK4, CTSB	60	1231	16792	2.27349	1	1	1
GOTERM_BP_ALL	GO:0007565~female pregnancy	4	5.88235	0.0280208	RXRA, BSG, JUNB, CTSB	60	187	16792	5.98645	1	1	1
GOTERM_BP_ALL	GO:0001701~in utero embryonic development	5	7.35294	0.0288948	RXRA, GNA12, MYH9, PLCD3, JUNB	60	331	16792	4.22759	1	1	1
GOTERM_BP_ALL	GO:0022603~regulation of anatomical structure morphogenesis	9	13.2353	0.0298205	LFNG, FMNL1, RXRA, COL5A1, GNA12, PALM, DVL1, ADGRB1, MYH9	60	1051	16792	2.39657	1	1	1
GOTERM_BP_ALL	GO:0051014~actin filament severing	2	2.94118	0.0345945	FMNL1, MYH9	60	10	16792	55.9733	1	1	1
GOTERM_BP_ALL	GO:0031507~heterochromatin assembly	2	2.94118	0.0379886	TNRC18, BAHCC1	60	11	16792	50.8848	1	1	1
GOTERM_BP_ALL	GO:0002098~tRNA wobble uridine modification	2	2.94118	0.0379886	CTU2, GTPBP3	60	11	16792	50.8848	1	1	1
GOTERM_BP_ALL	GO:0044706~multi-multicellular organism process	4	5.88235	0.039859	RXRA, BSG, JUNB, CTSB	60	215	16792	5.20682	1	1	1
GOTERM_BP_ALL	GO:0002097~tRNA wobble base modification	2	2.94118	0.0413709	CTU2, GTPBP3	60	12	16792	46.6444	1	1	1
GOTERM_BP_ALL	GO:0048646~anatomical structure formation involved in morphogenesis	9	13.2353	0.047113	LFNG, EGFL7, COL5A1, DVL1, ADGRB1, MYH9, PLCD3, ATP6V0D1, JUNB	60	1151	16792	2.18836	1	1	1
GOTERM_BP_ALL	GO:0070828~heterochromatin organization	2	2.94118	0.0481005	TNRC18, BAHCC1	60	14	16792	39.981	1	1	1
GOTERM_BP_ALL	GO:0009790~embryo development	8	11.7647	0.0488588	LFNG, RXRA, COL5A1, GNA12, DVL1, MYH9, PLCD3, JUNB	60	954	16792	2.34689	1	1	1
GOTERM_BP_ALL	GO:0022414~reproductive process	10	14.7059	0.0490937	GAMT, LFNG, RXRA, ANKLE1, BSG, MYH9, PLCD3, JUNB, PCSK4, CTSB	60	1373	16792	2.03836	1	1	1
GOTERM_BP_ALL	GO:0000003~reproduction	10	14.7059	0.0494718	GAMT, LFNG, RXRA, ANKLE1, BSG, MYH9, PLCD3, JUNB, PCSK4, CTSB	60	1375	16792	2.03539	1	1	1

## Sheet: SUPER.EB24
Category	Term	Count	%	PValue	Genes	List Total	Pop Hits	Pop Total	Fold Enrichment	Bonferroni	Benjamini	FDR
GOTERM_BP_ALL	GO:0045936~negative regulation of phosphate metabolic process	15	10.6383	3.73157e-05	RTN4R, HEXIM1, SLC27A1, ELL, PDGFA, ADARB1, PRKCZ, NLRP12, TFAP4, PRKAR1B, PALM, DDIT4, DVL1, MYADM, PMEPA1	122	544	16792	3.7952	0.0967217	0.0508614	0.0508614
GOTERM_BP_ALL	GO:0010563~negative regulation of phosphorus metabolic process	15	10.6383	3.73157e-05	RTN4R, HEXIM1, SLC27A1, ELL, PDGFA, ADARB1, PRKCZ, NLRP12, TFAP4, PRKAR1B, PALM, DDIT4, DVL1, MYADM, PMEPA1	122	544	16792	3.7952	0.0967217	0.0508614	0.0508614
GOTERM_BP_ALL	GO:0050793~regulation of developmental process	30	21.2766	0.000460313	RTN4R, ITGB2, PDGFA, PRKCZ, TRIOBP, ZFP36L2, LFNG, RXRA, LGALS1, PALM, GNA12, DVL1, SEMA6B, KLF10, GAMT, RBM38, METRN, INSR, FMNL1, COL5A1, CLCF1, ADGRB1, MYADM, SNAI1, FAM20C, MYH9, ZFPM1, CARD11, DBN1, ANAPC2	122	2129	16792	1.93949	0.714953	0.260203	0.260203
GOTERM_BP_ALL	GO:0001933~negative regulation of protein phosphorylation	11	7.80142	0.000554063	RTN4R, HEXIM1, NLRP12, TFAP4, PRKAR1B, DDIT4, DVL1, MYADM, PMEPA1, ADARB1, PRKCZ	122	393	16792	3.8525	0.779266	0.260203	0.260203
GOTERM_BP_ALL	GO:0002521~leukocyte differentiation	12	8.51064	0.00063209	LFNG, KLF10, LGALS1, CLCF1, MYH9, FAM20C, LTBR, PRKCZ, ZFPM1, JUNB, CARD11, ZFP36L2	122	474	16792	3.48454	0.821581	0.260203	0.260203
GOTERM_BP_ALL	GO:0007154~cell communication	64	45.3901	0.000668992	GPSM1, SLC27A1, ITGB2, NOC2L, RAPGEFL1, LFNG, PPP3CC, LGALS1, FCGRT, GSG2, BSG, PALM, PMEPA1, SEMA6B, KLF10, EGFL7, RFC2, RHBDF2, IL17RA, ARHGAP45, DDIT4, ADGRB1, MYADM, FAM20C, MYH9, IRF8, ATP6V0D1, CARD11, DBN1, GRID2IP, ANAPC2, LY6E, RTN4R, PDGFA, PTTG1IP, RASGRP2, PRKCZ, RASIP1, PRAM1, ZFP36L2, NCLN, RXRA, CNR2, GNG7, DVL1, GNA12, RHPN1, ATP6V1C1, GSDMD, HEXIM1, RBM38, INSR, MIB2, ARID3A, PPP…	122	6275	16792	1.40381	0.838667	0.260203	0.260203
GOTERM_BP_ALL	GO:0016477~cell migration	20	14.1844	0.000795932	SEMA6B, INSR, ITGB2, PDGFA, ADARB1, LYST, PRKCZ, IL17RA, SLC7A5, NLRP12, FMNL1, TMEM201, COL5A1, CNR2, BSG, DDIT4, GNA12, MYADM, SNAI1, MYH9	122	1184	16792	2.32499	0.885888	0.260203	0.260203
GOTERM_BP_ALL	GO:0031400~negative regulation of protein modification process	13	9.21986	0.0009518	RTN4R, HEXIM1, ADARB1, NOC2L, PRKCZ, NLRP12, TFAP4, PRKAR1B, DDIT4, DVL1, MYADM, PMEPA1, ANAPC2	122	578	16792	3.09569	0.925417	0.260203	0.260203
GOTERM_BP_ALL	GO:0042326~negative regulation of phosphorylation	11	7.80142	0.00106373	RTN4R, HEXIM1, NLRP12, TFAP4, PRKAR1B, DDIT4, DVL1, MYADM, PMEPA1, ADARB1, PRKCZ	122	428	16792	3.53746	0.945046	0.260203	0.260203
GOTERM_BP_ALL	GO:0023052~signaling	63	44.6809	0.00116233	GPSM1, SLC27A1, ITGB2, NOC2L, RAPGEFL1, LFNG, PPP3CC, LGALS1, FCGRT, GSG2, BSG, PALM, PMEPA1, SEMA6B, KLF10, EGFL7, RFC2, RHBDF2, IL17RA, ARHGAP45, DDIT4, ADGRB1, MYADM, FAM20C, MYH9, IRF8, ATP6V0D1, CARD11, DBN1, GRID2IP, ANAPC2, LY6E, RTN4R, PDGFA, PTTG1IP, RASGRP2, PRKCZ, RASIP1, PRAM1, ZFP36L2, NCLN, RXRA, CNR2, GNG7, DVL1, GNA12, RHPN1, ATP6V1C1, HEXIM1, RBM38, INSR, MIB2, ARID3A, PPP1CA, NL…	122	6260	16792	1.38519	0.958011	0.260203	0.260203
GOTERM_BP_ALL	GO:0072331~signal transduction by p53 class mediator	7	4.96454	0.00128472	HEXIM1, RBM38, TFAP4, DDIT4, SNAI1, ARID3A, PTTG1IP	122	166	16792	5.80407	0.969935	0.260203	0.260203
GOTERM_BP_ALL	GO:0007165~signal transduction	59	41.844	0.00139375	GPSM1, SLC27A1, ITGB2, NOC2L, RAPGEFL1, LFNG, PPP3CC, LGALS1, FCGRT, GSG2, BSG, PALM, PMEPA1, SEMA6B, KLF10, EGFL7, RFC2, RHBDF2, IL17RA, ARHGAP45, DDIT4, ADGRB1, MYADM, FAM20C, MYH9, IRF8, ATP6V0D1, CARD11, LY6E, RTN4R, PDGFA, PTTG1IP, RASGRP2, PRKCZ, RASIP1, PRAM1, ZFP36L2, RXRA, CNR2, GNG7, DVL1, GNA12, RHPN1, ATP6V1C1, HEXIM1, RBM38, INSR, MIB2, ARID3A, PPP1CA, NLRP12, TFAP4, LPAR5, CLCF1, AG…	122	5775	16792	1.40619	0.977674	0.260203	0.260203
GOTERM_BP_ALL	GO:0022603~regulation of anatomical structure morphogenesis	18	12.766	0.00141034	SEMA6B, RTN4R, METRN, ITGB2, PDGFA, TRIOBP, LFNG, FMNL1, RXRA, COL5A1, PALM, GNA12, DVL1, ADGRB1, MYADM, SNAI1, MYH9, ANAPC2	122	1051	16792	2.35729	0.978663	0.260203	0.260203
GOTERM_BP_ALL	GO:0051246~regulation of protein metabolic process	32	22.695	0.00149715	RTN4R, SLC27A1, UHRF1, ITGB2, PDGFA, ADARB1, PTTG1IP, NOC2L, PRKCZ, ZFP36L2, RXRA, GNA12, DVL1, PMEPA1, HEXIM1, INSR, MEX3D, PPP1CA, NLRP12, TFAP4, PRKAR1B, CLCF1, DDIT4, AGO2, MYADM, MYH9, LTBR, AURKAIP1, ZFPM1, CARD11, RNF166, ANAPC2	122	2512	16792	1.75337	0.983165	0.260203	0.260203
GOTERM_BP_ALL	GO:0032870~cellular response to hormone stimulus	13	9.21986	0.00163606	SLC27A1, INSR, PRKCZ, ZFP36L2, TFAP4, RXRA, PRKAR1B, GNG7, DDIT4, PMEPA1, ATP6V0D1, JUNB, ATP6V1C1	122	616	16792	2.90473	0.988479	0.260203	0.260203
GOTERM_BP_ALL	GO:0045995~regulation of embryonic development	6	4.25532	0.00163616	LFNG, COL5A1, INSR, DVL1, SNAI1, MYADM	122	118	16792	6.99861	0.988482	0.260203	0.260203
GOTERM_BP_ALL	GO:0044700~single organism signaling	62	43.9716	0.0016651	GPSM1, SLC27A1, ITGB2, NOC2L, RAPGEFL1, LFNG, PPP3CC, LGALS1, FCGRT, GSG2, BSG, PALM, PMEPA1, SEMA6B, KLF10, EGFL7, RFC2, RHBDF2, IL17RA, ARHGAP45, DDIT4, ADGRB1, MYADM, FAM20C, MYH9, IRF8, ATP6V0D1, CARD11, DBN1, GRID2IP, ANAPC2, LY6E, RTN4R, PDGFA, PTTG1IP, RASGRP2, PRKCZ, RASIP1, PRAM1, ZFP36L2, RXRA, CNR2, GNG7, DVL1, GNA12, RHPN1, ATP6V1C1, HEXIM1, RBM38, INSR, MIB2, ARID3A, PPP1CA, NLRP12, …	122	6207	16792	1.37484	0.989357	0.260203	0.260203
GOTERM_BP_ALL	GO:0048523~negative regulation of cellular process	47	33.3333	0.00171814	RTN4R, SLC27A1, ELL, UHRF1, PDGFA, ADARB1, PTTG1IP, NOC2L, PRKCZ, TRIOBP, RASIP1, ZFP36L2, LFNG, RXRA, LGALS1, CNR2, PALM, DVL1, PMEPA1, TNRC18, JUNB, BAHCC1, SEMA6B, KLF10, HEXIM1, RBM38, EGFL7, RHBDF2, ARID3A, MEX3D, ATAD3A, NLRP12, TFAP4, PRKAR1B, COL5A1, CLCF1, DDIT4, AGO2, ADGRB1, MYADM, SNAI1, IRF8, MYH9, AURKAIP1, ZFPM1, GRID2IP, ANAPC2	122	4300	16792	1.50443	0.990792	0.260203	0.260203
GOTERM_BP_ALL	GO:0010646~regulation of cell communication	36	25.5319	0.00207207	GPSM1, RTN4R, PDGFA, PTTG1IP, NOC2L, PRKCZ, LFNG, PPP3CC, NCLN, LGALS1, CNR2, GNG7, PALM, GNA12, DVL1, PMEPA1, HEXIM1, EGFL7, RFC2, INSR, RHBDF2, MIB2, ARHGAP45, PPP1CA, NLRP12, TFAP4, CLCF1, DDIT4, MYADM, SNAI1, FAM20C, LTBR, CARD11, DBN1, GRID2IP, ANAPC2	122	3020	16792	1.64073	0.996498	0.280256	0.280256
GOTERM_BP_ALL	GO:0051716~cellular response to stimulus	67	47.5177	0.00208952	GPSM1, SLC27A1, ANKLE1, ITGB2, MUM1, NOC2L, LYST, RAPGEFL1, LFNG, PPP3CC, LGALS1, FCGRT, GSG2, BSG, PALM, PMEPA1, JUNB, POLE, SEMA6B, KLF10, EGFL7, RFC2, RHBDF2, IL17RA, ARHGAP45, PRKAR1B, DDIT4, ADGRB1, MYADM, FAM20C, MYH9, IRF8, ATP6V0D1, CARD11, LY6E, RTN4R, UHRF1, PDGFA, PTTG1IP, RASGRP2, PRKCZ, RASIP1, PRAM1, ZFP36L2, RXRA, CNR2, GNG7, DVL1, GNA12, RHPN1, ATP6V1C1, GSDMD, HEXIM1, RBM38, INSR…	122	6927	16792	1.33129	0.996661	0.280256	0.280256
GOTERM_BP_ALL	GO:0032268~regulation of cellular protein metabolic process	30	21.2766	0.00215898	RTN4R, SLC27A1, UHRF1, ITGB2, PDGFA, ADARB1, PTTG1IP, NOC2L, PRKCZ, ZFP36L2, RXRA, GNA12, DVL1, PMEPA1, HEXIM1, INSR, MEX3D, PPP1CA, NLRP12, TFAP4, PRKAR1B, CLCF1, DDIT4, AGO2, MYADM, MYH9, LTBR, AURKAIP1, RNF166, ANAPC2	122	2346	16792	1.76009	0.997238	0.280256	0.280256
GOTERM_BP_ALL	GO:0048522~positive regulation of cellular process	50	35.461	0.00243072	SLC27A1, ANKLE1, ELL, ITGB2, ADARB1, TRIOBP, LFNG, PPP3CC, LGALS1, PALM, JUNB, SEMA6B, KLF10, EGFL7, METRN, RFC2, IL17RA, PRKAR1B, DDIT4, ADGRB1, MYADM, FAM20C, MYH9, IRF8, AURKAIP1, ZFPM1, RNF166, CARD11, ANAPC2, UHRF1, PDGFA, PTTG1IP, PRKCZ, ZFP36L2, RXRA, DVL1, GSDMD, VASP, HEXIM1, RBM38, INSR, MIB2, ARID3A, PPP1CA, NLRP12, TFAP4, CLCF1, AGO2, SNAI1, LTBR	122	4744	16792	1.45067	0.998685	0.294149	0.294149
GOTERM_BP_ALL	GO:2000026~regulation of multicellular organismal development	24	17.0213	0.00256009	SEMA6B, RTN4R, KLF10, METRN, INSR, ITGB2, PDGFA, PRKCZ, ZFP36L2, LFNG, RXRA, LGALS1, COL5A1, CLCF1, PALM, DVL1, ADGRB1, MYADM, SNAI1, FAM20C, ZFPM1, CARD11, DBN1, ANAPC2	122	1721	16792	1.91943	0.999077	0.294149	0.294149
GOTERM_BP_ALL	GO:0022604~regulation of cell morphogenesis	12	8.51064	0.00267607	SEMA6B, RTN4R, FMNL1, METRN, GNA12, PALM, ITGB2, SNAI1, MYADM, MYH9, TRIOBP, ANAPC2	122	568	16792	2.90787	0.999328	0.294149	0.294149
GOTERM_BP_ALL	GO:0023051~regulation of signaling	36	25.5319	0.00275199	GPSM1, RTN4R, PDGFA, PTTG1IP, NOC2L, PRKCZ, LFNG, PPP3CC, NCLN, LGALS1, CNR2, GNG7, PALM, GNA12, DVL1, PMEPA1, HEXIM1, EGFL7, RFC2, INSR, RHBDF2, MIB2, ARHGAP45, PPP1CA, NLRP12, TFAP4, CLCF1, DDIT4, MYADM, SNAI1, FAM20C, LTBR, CARD11, DBN1, GRID2IP, ANAPC2	122	3070	16792	1.61401	0.999454	0.294149	0.294149
GOTERM_BP_ALL	GO:0040011~locomotion	22	15.6028	0.00293535	SEMA6B, VASP, INSR, ITGB2, PDGFA, ADARB1, LYST, PRKCZ, IL17RA, SLC7A5, NLRP12, FMNL1, TMEM201, COL5A1, CNR2, BSG, DDIT4, GNA12, DVL1, MYADM, SNAI1, MYH9	122	1530	16792	1.97913	0.999669	0.294149	0.294149
GOTERM_BP_ALL	GO:0051674~localization of cell	20	14.1844	0.00304796	SEMA6B, INSR, ITGB2, PDGFA, ADARB1, LYST, PRKCZ, IL17RA, SLC7A5, NLRP12, FMNL1, TMEM201, COL5A1, CNR2, BSG, DDIT4, GNA12, MYADM, SNAI1, MYH9	122	1330	16792	2.06976	0.999757	0.294149	0.294149
GOTERM_BP_ALL	GO:0048870~cell motility	20	14.1844	0.00304796	SEMA6B, INSR, ITGB2, PDGFA, ADARB1, LYST, PRKCZ, IL17RA, SLC7A5, NLRP12, FMNL1, TMEM201, COL5A1, CNR2, BSG, DDIT4, GNA12, MYADM, SNAI1, MYH9	122	1330	16792	2.06976	0.999757	0.294149	0.294149
GOTERM_BP_ALL	GO:0009653~anatomical structure morphogenesis	32	22.695	0.00312925	RTN4R, ITGB2, PDGFA, PRKCZ, TRIOBP, RASIP1, LFNG, RXRA, PALM, GNA12, BSG, DVL1, JUNB, SEMA6B, GAMT, VASP, EGFL7, METRN, INSR, PPP1CA, FMNL1, COL5A1, ADGRB1, MYADM, SNAI1, FAM20C, MYH9, RADIL, PLCD3, ATP6V0D1, ZFPM1, ANAPC2	122	2631	16792	1.67406	0.999805	0.294149	0.294149
GOTERM_BP_ALL	GO:0000902~cell morphogenesis	19	13.4752	0.00333175	SEMA6B, VASP, RTN4R, METRN, ITGB2, PRKCZ, TRIOBP, FMNL1, PALM, GNA12, DVL1, ADGRB1, MYADM, SNAI1, MYH9, RADIL, ATP6V0D1, ZFPM1, ANAPC2	122	1240	16792	2.10899	0.999888	0.302745	0.302745
GOTERM_BP_ALL	GO:0051248~negative regulation of protein metabolic process	17	12.0567	0.00352018	RTN4R, HEXIM1, ADARB1, NOC2L, MEX3D, PRKCZ, ZFP36L2, NLRP12, TFAP4, PRKAR1B, DDIT4, AGO2, DVL1, MYADM, PMEPA1, ZFPM1, ANAPC2	122	1049	16792	2.23057	0.999933	0.303376	0.303376
GOTERM_BP_ALL	GO:0009790~embryo development	16	11.3475	0.00356128	VASP, ELL, ITGB2, PDGFA, LFNG, RXRA, COL5A1, GNA12, DVL1, MYADM, SNAI1, MYH9, PLCD3, JUNB, POLE, ZFPM1	122	954	16792	2.30842	0.99994	0.303376	0.303376
GOTERM_BP_ALL	GO:0051128~regulation of cellular component organization	29	20.5674	0.00377224	RTN4R, UHRF1, ITGB2, PDGFA, NOC2L, RASGRP2, PRKCZ, TRIOBP, PPP3CC, NCLN, LGALS1, PALM, GNA12, DVL1, PMEPA1, SEMA6B, VASP, METRN, INSR, FMNL1, COL5A1, ADGRB1, MYADM, SNAI1, IRF8, MYH9, AURKAIP1, DBN1, ANAPC2	122	2323	16792	1.71827	0.999966	0.311297	0.311297
GOTERM_BP_ALL	GO:0007166~cell surface receptor signaling pathway	32	22.695	0.00390265	RTN4R, SLC27A1, ITGB2, PDGFA, PRKCZ, PRAM1, LFNG, FCGRT, BSG, DVL1, PMEPA1, ATP6V1C1, SEMA6B, KLF10, EGFL7, INSR, RHBDF2, MIB2, IL17RA, PPP1CA, NLRP12, CLCF1, DDIT4, AGO2, ADGRB1, SNAI1, IRF8, MYH9, LTBR, ATP6V0D1, CARD11, LY6E	122	2669	16792	1.65023	0.999977	0.311297	0.311297
GOTERM_BP_ALL	GO:0050896~response to stimulus	76	53.9007	0.00399684	GPSM1, SLC27A1, ANKLE1, ITGB2, MUM1, ADARB1, NOC2L, LYST, RAPGEFL1, LFNG, PPP3CC, LGALS1, FCGRT, GSG2, BSG, PALM, PMEPA1, JUNB, POLE, SEMA6B, KLF10, EGFL7, RFC2, RHBDF2, IL17RA, ARHGAP45, PRKAR1B, DDIT4, ADGRB1, MYADM, ORAI1, FAM20C, MYH9, IRF8, ATP6V0D1, ZFPM1, CARD11, LY6E, RTN4R, UHRF1, PDGFA, PTTG1IP, RASGRP2, PRKCZ, RASIP1, PRAM1, ZFP36L2, LILRA5, NCLN, RXRA, CNR2, GNG7, DVL1, GNA12, RHPN1, …	122	8329	16792	1.25592	0.999982	0.311297	0.311297
GOTERM_BP_ALL	GO:0031324~negative regulation of cellular metabolic process	29	20.5674	0.00431163	RTN4R, SLC27A1, ELL, UHRF1, PDGFA, ADARB1, NOC2L, PRKCZ, ZFP36L2, RXRA, PALM, DVL1, PMEPA1, TNRC18, JUNB, BAHCC1, KLF10, HEXIM1, MEX3D, NLRP12, TFAP4, PRKAR1B, DDIT4, AGO2, MYADM, SNAI1, IRF8, ZFPM1, ANAPC2	122	2345	16792	1.70215	0.999992	0.317172	0.317172
GOTERM_BP_ALL	GO:0006928~movement of cell or subcellular component	24	17.0213	0.00434095	SEMA6B, VASP, INSR, ITGB2, PDGFA, ADARB1, TUBB4B, LYST, PRKCZ, IL17RA, SLC7A5, NLRP12, FMNL1, TMEM201, COL5A1, CNR2, PALM, BSG, DDIT4, GNA12, DVL1, MYADM, SNAI1, MYH9	122	1795	16792	1.8403	0.999993	0.317172	0.317172
GOTERM_BP_ALL	GO:0048583~regulation of response to stimulus	40	28.3688	0.00442133	GPSM1, RTN4R, ANKLE1, ITGB2, PDGFA, PTTG1IP, NOC2L, PRKCZ, PRAM1, LFNG, PPP3CC, NCLN, LGALS1, CNR2, FCGRT, GNG7, PALM, GNA12, DVL1, PMEPA1, LAIR1, SEMA6B, HEXIM1, EGFL7, RFC2, INSR, RHBDF2, MIB2, IL17RA, ARHGAP45, PPP1CA, NLRP12, TFAP4, CLCF1, DDIT4, MYADM, SNAI1, FAM20C, LTBR, CARD11	122	3636	16792	1.51418	0.999994	0.317172	0.317172
GOTERM_BP_ALL	GO:0030154~cell differentiation	40	28.3688	0.00478148	GPSM1, RTN4R, ITGB2, PRKCZ, TRIOBP, RASIP1, ZFP36L2, PCSK4, RPS15, LFNG, RXRA, LGALS1, PALM, GNA12, DVL1, RPS11, JUNB, SEMA6B, KLF10, VASP, RBM38, TMEM120B, EGFL7, METRN, SLC7A5, COL5A1, CLCF1, DDIT4, ADGRB1, MYADM, SNAI1, IRF8, FAM20C, MYH9, RADIL, LTBR, ZFPM1, CARD11, DBN1, ANAPC2	122	3652	16792	1.50755	0.999998	0.334213	0.334213
GOTERM_BP_ALL	GO:0032269~negative regulation of cellular protein metabolic process	16	11.3475	0.00510397	RTN4R, HEXIM1, ADARB1, NOC2L, MEX3D, PRKCZ, ZFP36L2, NLRP12, TFAP4, PRKAR1B, DDIT4, AGO2, DVL1, MYADM, PMEPA1, ANAPC2	122	992	16792	2.21999	0.999999	0.347836	0.347836
GOTERM_BP_ALL	GO:0009966~regulation of signal transduction	32	22.695	0.00542674	GPSM1, RTN4R, PDGFA, PTTG1IP, NOC2L, PRKCZ, LFNG, PPP3CC, NCLN, LGALS1, GNG7, PALM, GNA12, DVL1, PMEPA1, HEXIM1, EGFL7, RFC2, INSR, RHBDF2, MIB2, ARHGAP45, PPP1CA, NLRP12, TFAP4, CLCF1, DDIT4, MYADM, SNAI1, FAM20C, LTBR, CARD11	122	2728	16792	1.61454	1	0.360812	0.360812
GOTERM_BP_ALL	GO:0016043~cellular component organization	59	41.844	0.00585785	ANKLE1, ITGB2, MUM1, NOC2L, LYST, TRIOBP, MRPL4, RPS15, LFNG, PPP3CC, LGALS1, GSG2, BSG, PALM, PMEPA1, RPS11, TNPO2, POLE, BAHCC1, SEMA6B, METRN, RFC2, POLRMT, DDIT4, ADGRB1, MYADM, MYH9, IRF8, ATP6V0D1, AURKAIP1, ZFPM1, PTMA, DBN1, ANAPC2, PLEC, RTN4R, TTYH1, UHRF1, PDGFA, RASGRP2, PRKCZ, NCLN, RXRA, DVL1, GNA12, TNRC18, ATP6V1C1, GSDMD, VASP, TMEM120B, INSR, TUBB4B, PPP1CA, FMNL1, TFAP4, COL5A1…	122	6109	16792	1.3293	1	0.364875	0.364875
GOTERM_BP_ALL	GO:0001775~cell activation	15	10.6383	0.0058607	ITGB2, PDGFA, PRKCZ, ZFP36L2, PRAM1, IL17RA, LFNG, LGALS1, CNR2, CLCF1, GNA12, MYH9, LTBR, ZFPM1, CARD11	122	910	16792	2.26878	1	0.364875	0.364875
GOTERM_BP_ALL	GO:0031329~regulation of cellular catabolic process	9	6.38298	0.00597561	INSR, GNA12, AGO2, DVL1, PTTG1IP, ZFP36L2, RNF166, ANAPC2, PPP1CA	122	377	16792	3.28582	1	0.364875	0.364875
GOTERM_BP_ALL	GO:0050789~regulation of biological process	93	65.9574	0.00604707	ZNF512B, GPSM1, SLC27A1, ANKLE1, ELL, ITGB2, ADARB1, NOC2L, TRIOBP, RAPGEFL1, LFNG, PPP3CC, LGALS1, FCGRT, GSG2, BSG, PALM, PMEPA1, QSOX2, JUNB, BAHCC1, SEMA6B, KLF10, GAMT, EGFL7, METRN, RFC2, RHBDF2, ATAD3A, IL17RA, ARHGAP45, PRKAR1B, DDIT4, ADGRB1, MYADM, ORAI1, FAM20C, MYH9, IRF8, ATP6V0D1, AURKAIP1, ZFPM1, RNF166, CARD11, DBN1, GRID2IP, ANAPC2, LY6E, RTN4R, TTYH1, UHRF1, PDGFA, PTTG1IP, RASG…	122	10922	16792	1.17199	1	0.364875	0.364875
GOTERM_BP_ALL	GO:0009892~negative regulation of metabolic process	30	21.2766	0.00621844	RTN4R, SLC27A1, ELL, UHRF1, PDGFA, ADARB1, NOC2L, PRKCZ, ZFP36L2, RXRA, CNR2, PALM, DVL1, PMEPA1, TNRC18, JUNB, BAHCC1, KLF10, HEXIM1, MEX3D, NLRP12, TFAP4, PRKAR1B, DDIT4, AGO2, MYADM, SNAI1, IRF8, ZFPM1, ANAPC2	122	2522	16792	1.63726	1	0.364875	0.364875
GOTERM_BP_ALL	GO:0032989~cellular component morphogenesis	19	13.4752	0.00641772	SEMA6B, VASP, RTN4R, METRN, ITGB2, PRKCZ, TRIOBP, FMNL1, PALM, GNA12, DVL1, ADGRB1, MYADM, SNAI1, MYH9, RADIL, ATP6V0D1, ZFPM1, ANAPC2	122	1321	16792	1.97967	1	0.364875	0.364875
GOTERM_BP_ALL	GO:0071840~cellular component organization or biogenesis	60	42.5532	0.00642481	ANKLE1, ITGB2, MUM1, NOC2L, LYST, TRIOBP, MRPL4, RPS15, LFNG, PPP3CC, LGALS1, GSG2, BSG, PALM, PMEPA1, RPS11, TNPO2, POLE, BAHCC1, SEMA6B, METRN, RFC2, POLRMT, DDIT4, ADGRB1, MYADM, MYH9, IRF8, ATP6V0D1, AURKAIP1, ZFPM1, PTMA, DBN1, ANAPC2, PLEC, RTN4R, TTYH1, UHRF1, PDGFA, NOC4L, RASGRP2, PRKCZ, NCLN, RXRA, DVL1, GNA12, TNRC18, ATP6V1C1, GSDMD, VASP, TMEM120B, INSR, TUBB4B, PPP1CA, FMNL1, TFAP4,…	122	6265	16792	1.31817	1	0.364875	0.364875
GOTERM_BP_ALL	GO:0051240~positive regulation of multicellular organismal process	20	14.1844	0.00670107	GSDMD, KLF10, SLC27A1, METRN, ITGB2, PDGFA, PRKCZ, IL17RA, NLRP12, LGALS1, CLCF1, PALM, DVL1, ADGRB1, SNAI1, IRF8, FAM20C, ZFPM1, CARD11, ANAPC2	122	1431	16792	1.92368	1	0.372798	0.372798
GOTERM_BP_ALL	GO:0030097~hemopoiesis	13	9.21986	0.00704782	KLF10, PRKCZ, ZFP36L2, LFNG, LGALS1, CLCF1, IRF8, FAM20C, MYH9, LTBR, JUNB, ZFPM1, CARD11	122	739	16792	2.42126	1	0.377142	0.377142
GOTERM_BP_ALL	GO:0045595~regulation of cell differentiation	21	14.8936	0.00705585	SEMA6B, RTN4R, RBM38, KLF10, METRN, PRKCZ, TRIOBP, ZFP36L2, LGALS1, COL5A1, CLCF1, PALM, DVL1, MYADM, SNAI1, FAM20C, JUNB, ZFPM1, CARD11, DBN1, ANAPC2	122	1544	16792	1.87204	1	0.377142	0.377142
GOTERM_BP_ALL	GO:0030330~DNA damage response, signal transduction by p53 class mediator	5	3.5461	0.00724563	RBM38, TFAP4, SNAI1, ARID3A, PTTG1IP	122	106	16792	6.49242	1	0.379838	0.379838
GOTERM_BP_ALL	GO:0048869~cellular developmental process	42	29.7872	0.0074511	GPSM1, RTN4R, ITGB2, PRKCZ, TRIOBP, RASIP1, ZFP36L2, PCSK4, RPS15, LFNG, RXRA, LGALS1, PALM, GNA12, DVL1, RPS11, JUNB, SEMA6B, KLF10, VASP, RBM38, TMEM120B, EGFL7, METRN, SLC7A5, FMNL1, COL5A1, CLCF1, DDIT4, ADGRB1, MYADM, SNAI1, IRF8, FAM20C, MYH9, RADIL, LTBR, ATP6V0D1, ZFPM1, CARD11, DBN1, ANAPC2	122	3992	16792	1.44811	1	0.38324	0.38324
GOTERM_BP_ALL	GO:0048519~negative regulation of biological process	47	33.3333	0.00764306	RTN4R, SLC27A1, ELL, UHRF1, PDGFA, ADARB1, PTTG1IP, NOC2L, PRKCZ, TRIOBP, RASIP1, ZFP36L2, LFNG, RXRA, LGALS1, CNR2, PALM, DVL1, PMEPA1, TNRC18, JUNB, BAHCC1, SEMA6B, KLF10, HEXIM1, RBM38, EGFL7, RHBDF2, ARID3A, MEX3D, ATAD3A, NLRP12, TFAP4, PRKAR1B, COL5A1, CLCF1, DDIT4, AGO2, ADGRB1, MYADM, SNAI1, IRF8, MYH9, AURKAIP1, ZFPM1, GRID2IP, ANAPC2	122	4623	16792	1.39932	1	0.385833	0.385833
GOTERM_BP_ALL	GO:0072358~cardiovascular system development	15	10.6383	0.00807304	HEXIM1, EGFL7, INSR, ITGB2, PDGFA, RASIP1, RXRA, COL5A1, DVL1, ADGRB1, SNAI1, MYH9, PLCD3, JUNB, ZFPM1	122	945	16792	2.18475	1	0.388679	0.388679
GOTERM_BP_ALL	GO:0072359~circulatory system development	15	10.6383	0.00807304	HEXIM1, EGFL7, INSR, ITGB2, PDGFA, RASIP1, RXRA, COL5A1, DVL1, ADGRB1, SNAI1, MYH9, PLCD3, JUNB, ZFPM1	122	945	16792	2.18475	1	0.388679	0.388679
GOTERM_BP_ALL	GO:0000904~cell morphogenesis involved in differentiation	13	9.21986	0.00812719	SEMA6B, VASP, RTN4R, METRN, TRIOBP, DVL1, ADGRB1, MYADM, SNAI1, MYH9, RADIL, ZFPM1, ANAPC2	122	753	16792	2.37624	1	0.388679	0.388679
GOTERM_BP_ALL	GO:0002376~immune system process	29	20.5674	0.00854847	ITGB2, ADARB1, PRKCZ, LYST, PRAM1, ZFP36L2, LILRA5, LFNG, LGALS1, CNR2, FCGRT, BSG, JUNB, LAIR1, KLF10, GSDMD, TUBB4B, IL17RA, SLC7A5, NLRP12, CLCF1, DDIT4, IRF8, ORAI1, FAM20C, MYH9, LTBR, ZFPM1, CARD11	122	2465	16792	1.61929	1	0.395851	0.395851
GOTERM_BP_ALL	GO:0009725~response to hormone	14	9.92908	0.00856758	SLC27A1, INSR, PRKCZ, ZFP36L2, TFAP4, RXRA, PRKAR1B, GNG7, BSG, DDIT4, PMEPA1, ATP6V0D1, JUNB, ATP6V1C1	122	854	16792	2.25638	1	0.395851	0.395851
GOTERM_BP_ALL	GO:0048534~hematopoietic or lymphoid organ development	13	9.21986	0.0103746	KLF10, PRKCZ, ZFP36L2, LFNG, LGALS1, CLCF1, IRF8, FAM20C, MYH9, LTBR, JUNB, ZFPM1, CARD11	122	778	16792	2.29989	1	0.471353	0.471353
GOTERM_BP_ALL	GO:0042770~signal transduction in response to DNA damage	5	3.5461	0.0107872	RBM38, TFAP4, SNAI1, ARID3A, PTTG1IP	122	119	16792	5.78317	1	0.482066	0.482066
GOTERM_BP_ALL	GO:0050794~regulation of cellular process	89	63.1206	0.0111383	ZNF512B, GPSM1, SLC27A1, ANKLE1, ELL, ITGB2, ADARB1, NOC2L, TRIOBP, RAPGEFL1, LFNG, PPP3CC, LGALS1, FCGRT, GSG2, BSG, PALM, PMEPA1, QSOX2, JUNB, BAHCC1, SEMA6B, KLF10, EGFL7, METRN, RFC2, RHBDF2, ATAD3A, IL17RA, ARHGAP45, PRKAR1B, DDIT4, ADGRB1, MYADM, FAM20C, MYH9, IRF8, ATP6V0D1, AURKAIP1, ZFPM1, RNF166, CARD11, DBN1, GRID2IP, ANAPC2, LY6E, RTN4R, UHRF1, PDGFA, PTTG1IP, RASGRP2, PRKCZ, RASIP1, …	122	10489	16792	1.16788	1	0.489728	0.489728
GOTERM_BP_ALL	GO:0009894~regulation of catabolic process	10	7.0922	0.0113762	INSR, GNA12, AGO2, DDIT4, DVL1, PTTG1IP, ZFP36L2, RNF166, ANAPC2, PPP1CA	122	509	16792	2.70411	1	0.492245	0.492245
GOTERM_BP_ALL	GO:0051094~positive regulation of developmental process	16	11.3475	0.0116017	KLF10, METRN, INSR, ITGB2, PDGFA, PRKCZ, TRIOBP, LGALS1, CLCF1, PALM, DVL1, ADGRB1, MYADM, SNAI1, FAM20C, ANAPC2	122	1089	16792	2.02225	1	0.494161	0.494161
GOTERM_BP_ALL	GO:0007275~multicellular organism development	48	34.0426	0.0127234	GPSM1, RTN4R, ELL, ITGB2, PDGFA, PRKCZ, RASIP1, ZFP36L2, RAPGEFL1, LFNG, PPP3CC, RXRA, LGALS1, PALM, GNA12, BSG, DVL1, JUNB, POLE, SEMA6B, KLF10, GAMT, VASP, HEXIM1, EGFL7, METRN, INSR, PPP1CA, SLC7A5, COL5A1, CLCF1, DDIT4, AGO2, ADGRB1, MYADM, SNAI1, IRF8, ORAI1, FAM20C, MYH9, RADIL, LTBR, PLCD3, ATP6V0D1, ZFPM1, CARD11, DBN1, ANAPC2	122	4877	16792	1.35466	1	0.526922	0.526922
GOTERM_BP_ALL	GO:0051239~regulation of multicellular organismal process	30	21.2766	0.0127575	RTN4R, SLC27A1, ITGB2, PDGFA, PRKCZ, ZFP36L2, LFNG, RXRA, LGALS1, PALM, DVL1, SEMA6B, KLF10, GAMT, GSDMD, METRN, INSR, IL17RA, NLRP12, COL5A1, CLCF1, ADGRB1, MYADM, SNAI1, IRF8, FAM20C, ZFPM1, CARD11, DBN1, ANAPC2	122	2659	16792	1.55291	1	0.526922	0.526922
GOTERM_BP_ALL	GO:0002573~myeloid leukocyte differentiation	6	4.25532	0.0134958	KLF10, MYH9, FAM20C, LTBR, ZFPM1, JUNB	122	195	16792	4.23506	1	0.5491	0.5491
GOTERM_BP_ALL	GO:0048518~positive regulation of biological process	51	36.1702	0.0137791	SLC27A1, ANKLE1, ELL, ITGB2, ADARB1, TRIOBP, LFNG, PPP3CC, LGALS1, PALM, JUNB, SEMA6B, KLF10, EGFL7, METRN, RFC2, IL17RA, PRKAR1B, DDIT4, ADGRB1, MYADM, ORAI1, FAM20C, MYH9, IRF8, AURKAIP1, ZFPM1, RNF166, CARD11, ANAPC2, UHRF1, PDGFA, PTTG1IP, PRKCZ, ZFP36L2, RXRA, DVL1, GSDMD, VASP, HEXIM1, RBM38, INSR, MIB2, ARID3A, PPP1CA, NLRP12, TFAP4, CLCF1, AGO2, SNAI1, LTBR	122	5285	16792	1.32821	1	0.551973	0.551973
GOTERM_BP_ALL	GO:0031331~positive regulation of cellular catabolic process	7	4.96454	0.0139714	INSR, AGO2, DVL1, PTTG1IP, ZFP36L2, RNF166, ANAPC2	122	272	16792	3.54219	1	0.551973	0.551973
GOTERM_BP_ALL	GO:0072661~protein targeting to plasma membrane	3	2.12766	0.0149493	PALM, BSG, MYADM	122	26	16792	15.8815	1	0.561144	0.561144
GOTERM_BP_ALL	GO:0045992~negative regulation of embryonic development	3	2.12766	0.0149493	LFNG, COL5A1, SNAI1	122	26	16792	15.8815	1	0.561144	0.561144
GOTERM_BP_ALL	GO:1901652~response to peptide	9	6.38298	0.0150666	KLF10, SLC27A1, PRKAR1B, GNG7, INSR, BSG, ATP6V0D1, PRKCZ, ATP6V1C1	122	444	16792	2.78999	1	0.561144	0.561144
GOTERM_BP_ALL	GO:0043933~macromolecular complex subunit organization	28	19.8582	0.0152954	UHRF1, MUM1, NOC2L, PRKCZ, TRIOBP, RPS15, MRPL4, RXRA, GSG2, DVL1, PMEPA1, TNRC18, TNPO2, BAHCC1, VASP, GSDMD, TMEM120B, INSR, PPP1CA, TFAP4, COL5A1, DDIT4, AGO2, MYADM, IRF8, AURKAIP1, ZFPM1, PTMA	122	2461	16792	1.56599	1	0.561144	0.561144
GOTERM_BP_ALL	GO:0002520~immune system development	13	9.21986	0.0153407	KLF10, PRKCZ, ZFP36L2, LFNG, LGALS1, CLCF1, IRF8, FAM20C, MYH9, LTBR, JUNB, ZFPM1, CARD11	122	821	16792	2.17943	1	0.561144	0.561144
GOTERM_BP_ALL	GO:0048731~system development	43	30.4965	0.0154387	GPSM1, RTN4R, ITGB2, PDGFA, PRKCZ, RASIP1, ZFP36L2, RAPGEFL1, LFNG, PPP3CC, RXRA, LGALS1, PALM, BSG, DVL1, JUNB, POLE, SEMA6B, KLF10, GAMT, VASP, HEXIM1, EGFL7, METRN, INSR, PPP1CA, SLC7A5, COL5A1, CLCF1, DDIT4, ADGRB1, SNAI1, IRF8, ORAI1, FAM20C, MYH9, LTBR, PLCD3, ATP6V0D1, ZFPM1, CARD11, DBN1, ANAPC2	122	4291	16792	1.37928	1	0.561144	0.561144
GOTERM_BP_ALL	GO:0065008~regulation of biological quality	37	26.2411	0.015728	RTN4R, SLC27A1, ITGB2, PDGFA, PRKCZ, TRIOBP, ZFP36L2, PPP3CC, NCLN, RXRA, LGALS1, CNR2, PALM, GNA12, DVL1, QSOX2, POLE, ATP6V1C1, SEMA6B, VASP, GSDMD, RBM38, RFC2, INSR, MEX3D, NLRP12, FMNL1, TFAP4, PRKAR1B, ADGRB1, MYADM, MYH9, ATP6V0D1, ZFPM1, DBN1, GRID2IP, ANAPC2	122	3548	16792	1.43536	1	0.564137	0.564137
GOTERM_BP_ALL	GO:0000956~nuclear-transcribed mRNA catabolic process	6	4.25532	0.016739	RPS15, LSM7, AGO2, RPS11, ZFP36L2, PNRC2	122	206	16792	4.00891	1	0.590703	0.590703
GOTERM_BP_ALL	GO:0048856~anatomical structure development	52	36.8794	0.0169973	GPSM1, ELL, ITGB2, TRIOBP, PCSK4, RAPGEFL1, LFNG, PPP3CC, LGALS1, BSG, PALM, JUNB, POLE, SEMA6B, KLF10, GAMT, EGFL7, METRN, SLC7A5, DDIT4, ADGRB1, MYADM, ORAI1, FAM20C, MYH9, IRF8, ATP6V0D1, ZFPM1, CARD11, DBN1, ANAPC2, RTN4R, PDGFA, PRKCZ, RASIP1, ZFP36L2, RXRA, DVL1, GNA12, VASP, HEXIM1, RBM38, INSR, PPP1CA, FMNL1, COL5A1, CLCF1, AGO2, SNAI1, RADIL, LTBR, PLCD3	122	5473	16792	1.30774	1	0.590703	0.590703
GOTERM_BP_ALL	GO:0044767~single-organism developmental process	52	36.8794	0.0171187	GPSM1, ELL, ITGB2, TRIOBP, PCSK4, RAPGEFL1, LFNG, PPP3CC, LGALS1, BSG, PALM, JUNB, POLE, SEMA6B, KLF10, GAMT, EGFL7, METRN, SLC7A5, DDIT4, ADGRB1, MYADM, ORAI1, FAM20C, MYH9, IRF8, ATP6V0D1, ZFPM1, CARD11, DBN1, ANAPC2, RTN4R, PDGFA, PRKCZ, RASIP1, ZFP36L2, RXRA, DVL1, GNA12, VASP, HEXIM1, RBM38, INSR, PPP1CA, FMNL1, COL5A1, CLCF1, AGO2, SNAI1, RADIL, LTBR, PLCD3	122	5475	16792	1.30726	1	0.590703	0.590703
GOTERM_BP_ALL	GO:0045597~positive regulation of cell differentiation	13	9.21986	0.0181913	KLF10, METRN, PRKCZ, TRIOBP, LGALS1, CLCF1, PALM, DVL1, MYADM, SNAI1, FAM20C, JUNB, ANAPC2	122	841	16792	2.1276	1	0.601247	0.601247
GOTERM_BP_ALL	GO:0048646~anatomical structure formation involved in morphogenesis	16	11.3475	0.0183821	VASP, EGFL7, ITGB2, PDGFA, RASIP1, LFNG, COL5A1, DVL1, ADGRB1, SNAI1, FAM20C, MYH9, PLCD3, ATP6V0D1, JUNB, ZFPM1	122	1151	16792	1.91332	1	0.601247	0.601247
GOTERM_BP_ALL	GO:1990138~neuron projection extension	5	3.5461	0.0190126	SEMA6B, RTN4R, DVL1, PRKCZ, ANAPC2	122	141	16792	4.88083	1	0.601247	0.601247
GOTERM_BP_ALL	GO:0045321~leukocyte activation	12	8.51064	0.0190276	LFNG, LGALS1, CNR2, CLCF1, ITGB2, MYH9, LTBR, PRKCZ, ZFPM1, CARD11, ZFP36L2, PRAM1	122	747	16792	2.21107	1	0.601247	0.601247
GOTERM_BP_ALL	GO:0031327~negative regulation of cellular biosynthetic process	19	13.4752	0.0191467	HEXIM1, KLF10, SLC27A1, UHRF1, PDGFA, NOC2L, MEX3D, ZFP36L2, NLRP12, TFAP4, RXRA, PALM, AGO2, SNAI1, IRF8, TNRC18, JUNB, ZFPM1, BAHCC1	122	1480	16792	1.76699	1	0.601247	0.601247
GOTERM_BP_ALL	GO:0050900~leukocyte migration	8	5.67376	0.0191492	SLC7A5, NLRP12, CNR2, ITGB2, BSG, MYH9, LYST, IL17RA	122	376	16792	2.9285	1	0.601247	0.601247
GOTERM_BP_ALL	GO:0065007~biological regulation	95	67.3759	0.0191715	ZNF512B, GPSM1, SLC27A1, ANKLE1, ELL, ITGB2, ADARB1, NOC2L, TRIOBP, RAPGEFL1, LFNG, PPP3CC, LGALS1, FCGRT, GSG2, BSG, PALM, PMEPA1, QSOX2, JUNB, POLE, BAHCC1, SEMA6B, KLF10, GAMT, EGFL7, METRN, RFC2, RHBDF2, ATAD3A, IL17RA, ARHGAP45, PRKAR1B, DDIT4, ADGRB1, MYADM, ORAI1, FAM20C, MYH9, IRF8, ATP6V0D1, AURKAIP1, ZFPM1, RNF166, CARD11, DBN1, GRID2IP, ANAPC2, LY6E, RTN4R, TTYH1, UHRF1, PDGFA, DENND3,…	122	11548	16792	1.13229	1	0.601247	0.601247
GOTERM_BP_ALL	GO:0009987~cellular process	119	84.3972	0.0191887	SLC27A1, ANKLE1, MUM1, ADARB1, NOC2L, RAPGEFL1, RPS15, LGALS1, FCGRT, BSG, PALM, RPS11, JUNB, BAHCC1, SEMA6B, GAMT, POLRMT, ATAD3B, ATAD3A, GTPBP3, ARHGAP45, PRKAR1B, DDIT4, ADGRB1, MYADM, ORAI1, ATP6V0D1, AURKAIP1, ZFPM1, CARD11, GRID2IP, ANAPC2, LY6E, RTN4R, TTYH1, PDGFA, PTTG1IP, RASGRP2, PRKCZ, ZFP36L2, PTDSS2, CHST12, DVL1, RHPN1, TNRC18, LONRF1, ATP6V1C1, HEXIM1, GSDMD, VASP, TMEM120B, CDT1…	122	15558	16792	1.05278	1	0.601247	0.601247
GOTERM_BP_ALL	GO:0001893~maternal placenta development	3	2.12766	0.0196388	RXRA, BSG, JUNB	122	30	16792	13.7639	1	0.608357	0.608357
GOTERM_BP_ALL	GO:0001890~placenta development	5	3.5461	0.0208317	RXRA, BSG, SNAI1, PLCD3, JUNB	122	145	16792	4.74618	1	0.628853	0.628853
GOTERM_BP_ALL	GO:0008360~regulation of cell shape	5	3.5461	0.0208317	FMNL1, GNA12, PALM, ITGB2, MYH9	122	145	16792	4.74618	1	0.628853	0.628853
GOTERM_BP_ALL	GO:0071072~negative regulation of phospholipid biosynthetic process	2	1.41844	0.0214633	SLC27A1, PDGFA	122	3	16792	91.7596	1	0.628853	0.628853
GOTERM_BP_ALL	GO:0051174~regulation of phosphorus metabolic process	20	14.1844	0.0216262	RTN4R, HEXIM1, SLC27A1, ELL, INSR, ITGB2, PDGFA, ADARB1, PRKCZ, NLRP12, TFAP4, PRKAR1B, CLCF1, PALM, DDIT4, DVL1, MYADM, PMEPA1, FAM20C, LTBR	122	1611	16792	1.70874	1	0.628853	0.628853
GOTERM_BP_ALL	GO:0006402~mRNA catabolic process	6	4.25532	0.0219425	RPS15, LSM7, AGO2, RPS11, ZFP36L2, PNRC2	122	221	16792	3.73681	1	0.628853	0.628853
GOTERM_BP_ALL	GO:0044707~single-multicellular organism process	55	39.0071	0.0220287	GPSM1, SLC27A1, ELL, ITGB2, RAPGEFL1, RPS15, LFNG, PPP3CC, LGALS1, BSG, PALM, RPS11, JUNB, POLE, SEMA6B, KLF10, GAMT, EGFL7, METRN, IL17RA, SLC7A5, PRKAR1B, DDIT4, ADGRB1, MYADM, ORAI1, FAM20C, MYH9, IRF8, ATP6V0D1, ZFPM1, CARD11, DBN1, ANAPC2, RTN4R, PDGFA, PRKCZ, RASIP1, ZFP36L2, RXRA, DVL1, GNA12, GSDMD, VASP, HEXIM1, INSR, PPP1CA, NLRP12, COL5A1, CLCF1, AGO2, SNAI1, RADIL, LTBR, PLCD3	122	5943	16792	1.2738	1	0.628853	0.628853
GOTERM_BP_ALL	GO:0009890~negative regulation of biosynthetic process	19	13.4752	0.0221437	HEXIM1, KLF10, SLC27A1, UHRF1, PDGFA, NOC2L, MEX3D, ZFP36L2, NLRP12, TFAP4, RXRA, PALM, AGO2, SNAI1, IRF8, TNRC18, JUNB, ZFPM1, BAHCC1	122	1504	16792	1.73879	1	0.628853	0.628853
GOTERM_BP_ALL	GO:0035556~intracellular signal transduction	29	20.5674	0.022146	RTN4R, PDGFA, PTTG1IP, NOC2L, RASGRP2, PRKCZ, ZFP36L2, RAPGEFL1, LGALS1, GSG2, GNA12, DVL1, HEXIM1, RBM38, RFC2, INSR, MIB2, ARID3A, ARHGAP45, NLRP12, TFAP4, CLCF1, DDIT4, AGO2, MYADM, SNAI1, LTBR, PLCD3, CARD11	122	2657	16792	1.50227	1	0.628853	0.628853
GOTERM_BP_ALL	GO:0051247~positive regulation of protein metabolic process	19	13.4752	0.0226766	SLC27A1, UHRF1, INSR, PDGFA, PTTG1IP, PRKCZ, NLRP12, TFAP4, RXRA, PRKAR1B, CLCF1, DVL1, MYH9, LTBR, AURKAIP1, ZFPM1, CARD11, RNF166, ANAPC2	122	1508	16792	1.73418	1	0.632943	0.632943
GOTERM_BP_ALL	GO:0002285~lymphocyte activation involved in immune response	5	3.5461	0.0227544	LFNG, LGALS1, CLCF1, PRKCZ, ZFPM1	122	149	16792	4.61877	1	0.632943	0.632943
GOTERM_BP_ALL	GO:0031589~cell-substrate adhesion	7	4.96454	0.0234572	LGALS1, TTYH1, ITGB2, MYADM, RADIL, PRKCZ, TRIOBP	122	306	16792	3.14861	1	0.645902	0.645902
GOTERM_BP_ALL	GO:0043009~chordate embryonic development	10	7.0922	0.0236979	VASP, LFNG, RXRA, ELL, GNA12, DVL1, SNAI1, MYH9, PLCD3, JUNB	122	577	16792	2.38543	1	0.646006	0.646006
GOTERM_BP_ALL	GO:0001932~regulation of protein phosphorylation	17	12.0567	0.0243169	RTN4R, HEXIM1, SLC27A1, INSR, ITGB2, PDGFA, ADARB1, PRKCZ, NLRP12, TFAP4, PRKAR1B, CLCF1, DDIT4, DVL1, MYADM, PMEPA1, LTBR	122	1300	16792	1.7999	1	0.653903	0.653903
GOTERM_BP_ALL	GO:0030098~lymphocyte differentiation	7	4.96454	0.0248011	LFNG, LGALS1, CLCF1, PRKCZ, ZFPM1, CARD11, ZFP36L2	122	310	16792	3.10799	1	0.653903	0.653903
GOTERM_BP_ALL	GO:0098602~single organism cell adhesion	12	8.51064	0.0249972	LFNG, LGALS1, TTYH1, ITGB2, MYADM, MYH9, RADIL, PRKCZ, ZFPM1, CARD11, TRIOBP, ZFP36L2	122	779	16792	2.12025	1	0.653903	0.653903
GOTERM_BP_ALL	GO:0009792~embryo development ending in birth or egg hatching	10	7.0922	0.0251197	VASP, LFNG, RXRA, ELL, GNA12, DVL1, SNAI1, MYH9, PLCD3, JUNB	122	583	16792	2.36088	1	0.653903	0.653903
GOTERM_BP_ALL	GO:0072657~protein localization to membrane	9	6.38298	0.025187	RPS15, PPP3CC, PALM, ITGB2, BSG, DVL1, MYADM, RPS11, PRKCZ	122	489	16792	2.53324	1	0.653903	0.653903
GOTERM_BP_ALL	GO:1901653~cellular response to peptide	7	4.96454	0.0265523	KLF10, PRKAR1B, GNG7, INSR, ATP6V0D1, PRKCZ, ATP6V1C1	122	315	16792	3.05865	1	0.682846	0.682846
GOTERM_BP_ALL	GO:0043434~response to peptide hormone	8	5.67376	0.0273336	SLC27A1, PRKAR1B, GNG7, INSR, BSG, ATP6V0D1, PRKCZ, ATP6V1C1	122	405	16792	2.7188	1	0.696368	0.696368
GOTERM_BP_ALL	GO:2000664~positive regulation of interleukin-5 secretion	2	1.41844	0.0285157	PRKCZ, IL17RA	122	4	16792	68.8197	1	0.70362	0.70362
GOTERM_BP_ALL	GO:0006659~phosphatidylserine biosynthetic process	2	1.41844	0.0285157	PTDSS2, SLC27A1	122	4	16792	68.8197	1	0.70362	0.70362
GOTERM_BP_ALL	GO:0006469~negative regulation of protein kinase activity	6	4.25532	0.0285472	RTN4R, HEXIM1, TFAP4, PRKAR1B, DVL1, ADARB1	122	237	16792	3.48454	1	0.70362	0.70362
GOTERM_BP_ALL	GO:0006955~immune response	19	13.4752	0.0290497	GSDMD, ITGB2, ADARB1, TUBB4B, LYST, PRKCZ, PRAM1, LILRA5, LFNG, LGALS1, CNR2, FCGRT, CLCF1, IRF8, ORAI1, LTBR, ZFPM1, CARD11, LAIR1	122	1551	16792	1.6861	1	0.70362	0.70362
GOTERM_BP_ALL	GO:0031399~regulation of protein modification process	20	14.1844	0.0290831	RTN4R, HEXIM1, SLC27A1, INSR, ITGB2, PDGFA, ADARB1, PTTG1IP, NOC2L, PRKCZ, NLRP12, TFAP4, PRKAR1B, CLCF1, DDIT4, DVL1, MYADM, PMEPA1, LTBR, ANAPC2	122	1664	16792	1.65432	1	0.70362	0.70362
GOTERM_BP_ALL	GO:0032502~developmental process	52	36.8794	0.0291669	GPSM1, ELL, ITGB2, TRIOBP, PCSK4, RAPGEFL1, LFNG, PPP3CC, LGALS1, BSG, PALM, JUNB, POLE, SEMA6B, KLF10, GAMT, EGFL7, METRN, SLC7A5, DDIT4, ADGRB1, MYADM, ORAI1, FAM20C, MYH9, IRF8, ATP6V0D1, ZFPM1, CARD11, DBN1, ANAPC2, RTN4R, PDGFA, PRKCZ, RASIP1, ZFP36L2, RXRA, DVL1, GNA12, VASP, HEXIM1, RBM38, INSR, PPP1CA, FMNL1, COL5A1, CLCF1, AGO2, SNAI1, RADIL, LTBR, PLCD3	122	5632	16792	1.27082	1	0.70362	0.70362
GOTERM_BP_ALL	GO:0010975~regulation of neuron projection development	8	5.67376	0.0299558	SEMA6B, RTN4R, LGALS1, METRN, PALM, DVL1, DBN1, ANAPC2	122	413	16792	2.66614	1	0.716312	0.716312
GOTERM_BP_ALL	GO:1901796~regulation of signal transduction by p53 class mediator	5	3.5461	0.0303171	HEXIM1, RFC2, SNAI1, PTTG1IP, NOC2L	122	163	16792	4.22207	1	0.718647	0.718647
GOTERM_BP_ALL	GO:0010770~positive regulation of cell morphogenesis involved in differentiation	5	3.5461	0.0309076	METRN, SNAI1, MYADM, TRIOBP, ANAPC2	122	164	16792	4.19632	1	0.726329	0.726329
GOTERM_BP_ALL	GO:1902105~regulation of leukocyte differentiation	6	4.25532	0.0317938	KLF10, LGALS1, PRKCZ, ZFPM1, CARD11, ZFP36L2	122	244	16792	3.38457	1	0.740769	0.740769
GOTERM_BP_ALL	GO:0001701~in utero embryonic development	7	4.96454	0.0327039	RXRA, ELL, GNA12, SNAI1, MYH9, PLCD3, JUNB	122	331	16792	2.9108	1	0.755515	0.755515
GOTERM_BP_ALL	GO:0050715~positive regulation of cytokine secretion	4	2.83688	0.0329887	GSDMD, NLRP12, PRKCZ, IL17RA	122	97	16792	5.67585	1	0.75569	0.75569
GOTERM_BP_ALL	GO:0009896~positive regulation of catabolic process	7	4.96454	0.0335328	INSR, AGO2, DVL1, PTTG1IP, ZFP36L2, RNF166, ANAPC2	122	333	16792	2.89332	1	0.761754	0.761754
GOTERM_BP_ALL	GO:1901700~response to oxygen-containing compound	18	12.766	0.0338232	KLF10, SLC27A1, INSR, PRKCZ, ZFP36L2, TFAP4, RXRA, LGALS1, PRKAR1B, CNR2, GNG7, BSG, DDIT4, IRF8, LTBR, ATP6V0D1, JUNB, ATP6V1C1	122	1466	16792	1.68998	1	0.762001	0.762001
GOTERM_BP_ALL	GO:0006401~RNA catabolic process	6	4.25532	0.0342492	RPS15, LSM7, AGO2, RPS11, ZFP36L2, PNRC2	122	249	16792	3.31661	1	0.765274	0.765274
GOTERM_BP_ALL	GO:0042398~cellular modified amino acid biosynthetic process	3	2.12766	0.0351749	GAMT, PTDSS2, SLC27A1	122	41	16792	10.0712	1	0.779567	0.779567
GOTERM_BP_ALL	GO:0043241~protein complex disassembly	6	4.25532	0.0357776	MRPL4, DDIT4, DVL1, AURKAIP1, TRIOBP, PPP1CA	122	252	16792	3.27713	1	0.781049	0.781049
GOTERM_BP_ALL	GO:0007369~gastrulation	5	3.5461	0.0358761	COL5A1, ITGB2, DVL1, SNAI1, MYADM	122	172	16792	4.00114	1	0.781049	0.781049
GOTERM_BP_ALL	GO:0010769~regulation of cell morphogenesis involved in differentiation	7	4.96454	0.0361013	SEMA6B, RTN4R, METRN, SNAI1, MYADM, TRIOBP, ANAPC2	122	339	16792	2.84211	1	0.781049	0.781049
GOTERM_BP_ALL	GO:0033673~negative regulation of kinase activity	6	4.25532	0.0368197	RTN4R, HEXIM1, TFAP4, PRKAR1B, DVL1, ADARB1	122	254	16792	3.25132	1	0.790319	0.790319
GOTERM_BP_ALL	GO:0030099~myeloid cell differentiation	7	4.96454	0.0378823	KLF10, IRF8, MYH9, FAM20C, LTBR, ZFPM1, JUNB	122	343	16792	2.80897	1	0.806774	0.806774
GOTERM_BP_ALL	GO:0043470~regulation of carbohydrate catabolic process	3	2.12766	0.0383782	INSR, DDIT4, PPP1CA	122	43	16792	9.60274	1	0.810238	0.810238
GOTERM_BP_ALL	GO:0071310~cellular response to organic substance	24	17.0213	0.0386394	RTN4R, KLF10, SLC27A1, INSR, ITGB2, PRKCZ, ZFP36L2, IL17RA, NLRP12, TFAP4, RXRA, LGALS1, PRKAR1B, GNG7, CLCF1, DDIT4, AGO2, IRF8, PMEPA1, FAM20C, LTBR, ATP6V0D1, JUNB, ATP6V1C1	122	2186	16792	1.51114	1	0.810238	0.810238
GOTERM_BP_ALL	GO:0019220~regulation of phosphate metabolic process	19	13.4752	0.0398932	RTN4R, HEXIM1, SLC27A1, ELL, INSR, ITGB2, PDGFA, ADARB1, PRKCZ, NLRP12, TFAP4, PRKAR1B, CLCF1, PALM, DDIT4, DVL1, MYADM, PMEPA1, LTBR	122	1610	16792	1.62432	1	0.830144	0.830144
GOTERM_BP_ALL	GO:0032984~macromolecular complex disassembly	6	4.25532	0.0411743	MRPL4, DDIT4, DVL1, AURKAIP1, TRIOBP, PPP1CA	122	262	16792	3.15205	1	0.831452	0.831452
GOTERM_BP_ALL	GO:0048675~axon extension	4	2.83688	0.0412229	SEMA6B, RTN4R, DVL1, ANAPC2	122	106	16792	5.19394	1	0.831452	0.831452
GOTERM_BP_ALL	GO:0006950~response to stress	36	25.5319	0.0418796	SLC27A1, ANKLE1, UHRF1, ITGB2, MUM1, PDGFA, ADARB1, PTTG1IP, PRKCZ, LYST, ZFP36L2, LILRA5, LGALS1, CNR2, GNA12, POLE, KLF10, GSDMD, RBM38, RFC2, ARID3A, TUBB4B, IL17RA, PPP1CA, NLRP12, TFAP4, PRKAR1B, COL5A1, DDIT4, SNAI1, IRF8, MYH9, LTBR, ATP6V0D1, ZFPM1, CARD11	122	3677	16792	1.34757	1	0.831452	0.831452
GOTERM_BP_ALL	GO:0042325~regulation of phosphorylation	17	12.0567	0.042065	RTN4R, HEXIM1, SLC27A1, INSR, ITGB2, PDGFA, ADARB1, PRKCZ, NLRP12, TFAP4, PRKAR1B, CLCF1, DDIT4, DVL1, MYADM, PMEPA1, LTBR	122	1393	16792	1.67973	1	0.831452	0.831452
GOTERM_BP_ALL	GO:0010605~negative regulation of macromolecule metabolic process	25	17.7305	0.0423373	RTN4R, UHRF1, ADARB1, NOC2L, PRKCZ, ZFP36L2, RXRA, DVL1, PMEPA1, TNRC18, JUNB, BAHCC1, KLF10, HEXIM1, MEX3D, NLRP12, TFAP4, PRKAR1B, DDIT4, AGO2, MYADM, SNAI1, IRF8, ZFPM1, ANAPC2	122	2326	16792	1.47936	1	0.831452	0.831452
GOTERM_BP_ALL	GO:2000662~regulation of interleukin-5 secretion	2	1.41844	0.0424697	PRKCZ, IL17RA	122	6	16792	45.8798	1	0.831452	0.831452
GOTERM_BP_ALL	GO:2000667~positive regulation of interleukin-13 secretion	2	1.41844	0.0424697	PRKCZ, IL17RA	122	6	16792	45.8798	1	0.831452	0.831452
GOTERM_BP_ALL	GO:0072603~interleukin-5 secretion	2	1.41844	0.0424697	PRKCZ, IL17RA	122	6	16792	45.8798	1	0.831452	0.831452
GOTERM_BP_ALL	GO:0043123~positive regulation of I-kappaB kinase/NF-kappaB signaling	5	3.5461	0.0427011	NLRP12, LGALS1, MIB2, LTBR, CARD11	122	182	16792	3.7813	1	0.831452	0.831452
GOTERM_BP_ALL	GO:0060284~regulation of cell development	12	8.51064	0.0432537	SEMA6B, RTN4R, LGALS1, METRN, CLCF1, PALM, DVL1, SNAI1, MYADM, TRIOBP, DBN1, ANAPC2	122	851	16792	1.94086	1	0.832818	0.832818
GOTERM_BP_ALL	GO:0051055~negative regulation of lipid biosynthetic process	3	2.12766	0.0433823	SLC27A1, SNAI1, PDGFA	122	46	16792	8.97648	1	0.832818	0.832818
GOTERM_BP_ALL	GO:0051348~negative regulation of transferase activity	7	4.96454	0.0445554	RTN4R, HEXIM1, TFAP4, PRKAR1B, DVL1, ADARB1, ANAPC2	122	357	16792	2.69881	1	0.847652	0.847652
GOTERM_BP_ALL	GO:0045862~positive regulation of proteolysis	7	4.96454	0.0450585	NLRP12, TFAP4, DVL1, MYH9, AURKAIP1, RNF166, ANAPC2	122	358	16792	2.69127	1	0.847652	0.847652
GOTERM_BP_ALL	GO:0010648~negative regulation of cell communication	15	10.6383	0.0450879	RTN4R, EGFL7, PTTG1IP, NOC2L, PRKCZ, LFNG, NLRP12, CNR2, PALM, DDIT4, DVL1, MYADM, SNAI1, PMEPA1, GRID2IP	122	1182	16792	1.74669	1	0.847652	0.847652
GOTERM_BP_ALL	GO:0071495~cellular response to endogenous stimulus	15	10.6383	0.0458881	KLF10, SLC27A1, INSR, ITGB2, PRKCZ, ZFP36L2, TFAP4, RXRA, PRKAR1B, GNG7, DDIT4, PMEPA1, ATP6V0D1, JUNB, ATP6V1C1	122	1185	16792	1.74227	1	0.855947	0.855947
GOTERM_BP_ALL	GO:0023057~negative regulation of signaling	15	10.6383	0.0461571	RTN4R, EGFL7, PTTG1IP, NOC2L, PRKCZ, LFNG, NLRP12, CNR2, PALM, DDIT4, DVL1, MYADM, SNAI1, PMEPA1, GRID2IP	122	1186	16792	1.7408	1	0.855947	0.855947
GOTERM_BP_ALL	GO:0048588~developmental cell growth	5	3.5461	0.0471246	SEMA6B, RTN4R, DVL1, PRKCZ, ANAPC2	122	188	16792	3.66062	1	0.86416	0.86416
GOTERM_BP_ALL	GO:0035821~modification of morphology or physiology of other organism	4	2.83688	0.047234	GSDMD, RXRA, TFAP4, INSR	122	112	16792	4.91569	1	0.86416	0.86416
GOTERM_BP_ALL	GO:0006413~translational initiation	5	3.5461	0.0478858	RPS15, RXRA, AGO2, RPS11, PPP1CA	122	189	16792	3.64125	1	0.864175	0.864175
GOTERM_BP_ALL	GO:0008286~insulin receptor signaling pathway	4	2.83688	0.0482757	INSR, ATP6V0D1, PRKCZ, ATP6V1C1	122	113	16792	4.87219	1	0.864175	0.864175
GOTERM_BP_ALL	GO:0032270~positive regulation of cellular protein metabolic process	17	12.0567	0.048641	SLC27A1, UHRF1, INSR, PDGFA, PTTG1IP, PRKCZ, NLRP12, TFAP4, RXRA, PRKAR1B, CLCF1, DVL1, MYH9, LTBR, AURKAIP1, RNF166, ANAPC2	122	1420	16792	1.64779	1	0.864175	0.864175
GOTERM_BP_ALL	GO:0006612~protein targeting to membrane	5	3.5461	0.0486538	RPS15, PALM, BSG, MYADM, RPS11	122	190	16792	3.62209	1	0.864175	0.864175
GOTERM_BP_ALL	GO:0044265~cellular macromolecule catabolic process	13	9.21986	0.0488198	UHRF1, DENND3, PTTG1IP, ZFP36L2, PNRC2, RPS15, LSM7, GNA12, AGO2, DVL1, RPS11, RNF166, ANAPC2	122	976	16792	1.83331	1	0.864175	0.864175
GOTERM_BP_ALL	GO:1903726~negative regulation of phospholipid metabolic process	2	1.41844	0.0493719	SLC27A1, PDGFA	122	7	16792	39.3255	1	0.868309	0.868309

## Sheet: SUPER.EB96
Category	Term	Count	%	PValue	Genes	List Total	Pop Hits	Pop Total	Fold Enrichment	Bonferroni	Benjamini	FDR
GOTERM_BP_ALL	GO:0031329~regulation of cellular catabolic process	10	8	0.000779686	INSR, GNA12, AGO2, DVL1, PTTG1IP, PRKACA, ZFP36L2, RNF166, ANAPC2, PPP1CA	110	377	16792	4.04919	0.871241	0.652903	0.652903
GOTERM_BP_ALL	GO:0001775~cell activation	16	12.8	0.000781475	CDKN1A, ITGB2, RASAL3, PRKCZ, ZFP36L2, PRAM1, IL17RA, LFNG, HSH2D, LGALS1, CLCF1, GNA12, MYH9, LTBR, JAK3, ZFPM1	110	910	16792	2.68404	0.871845	0.652903	0.652903
GOTERM_BP_ALL	GO:0045321~leukocyte activation	14	11.2	0.00109699	CDKN1A, ITGB2, RASAL3, PRKCZ, ZFP36L2, PRAM1, LFNG, HSH2D, LGALS1, CLCF1, MYH9, LTBR, JAK3, ZFPM1	110	747	16792	2.861	0.944115	0.652903	0.652903
GOTERM_BP_ALL	GO:0009894~regulation of catabolic process	11	8.8	0.00174834	INSR, GNA12, AGO2, DDIT4, DVL1, PTTG1IP, PRKACA, ZFP36L2, RNF166, ANAPC2, PPP1CA	110	509	16792	3.29902	0.989935	0.652903	0.652903
GOTERM_BP_ALL	GO:0032870~cellular response to hormone stimulus	12	9.6	0.00219414	SLC27A1, RXRA, TFAP4, GNG7, INSR, DDIT4, ATP6V0D1, PRKACA, JAK3, PRKCZ, JUNB, ZFP36L2	110	616	16792	2.97379	0.996888	0.652903	0.652903
GOTERM_BP_ALL	GO:0045936~negative regulation of phosphate metabolic process	11	8.8	0.0028337	RTN4R, HEXIM1, CDKN1A, SLC27A1, TFAP4, ELL, PALM, DDIT4, DVL1, ADARB1, PRKCZ	110	544	16792	3.08676	0.999423	0.652903	0.652903
GOTERM_BP_ALL	GO:0010563~negative regulation of phosphorus metabolic process	11	8.8	0.0028337	RTN4R, HEXIM1, CDKN1A, SLC27A1, TFAP4, ELL, PALM, DDIT4, DVL1, ADARB1, PRKCZ	110	544	16792	3.08676	0.999423	0.652903	0.652903
GOTERM_BP_ALL	GO:0002285~lymphocyte activation involved in immune response	6	4.8	0.00286779	LFNG, LGALS1, CLCF1, JAK3, PRKCZ, ZFPM1	110	149	16792	6.14716	0.999473	0.652903	0.652903
GOTERM_BP_ALL	GO:0046649~lymphocyte activation	12	9.6	0.00305302	LFNG, CDKN1A, HSH2D, LGALS1, CLCF1, ITGB2, MYH9, RASAL3, JAK3, PRKCZ, ZFPM1, ZFP36L2	110	643	16792	2.84892	0.999676	0.652903	0.652903
GOTERM_BP_ALL	GO:0007154~cell communication	56	44.8	0.00350677	GPSM1, CDKN1A, SLC27A1, ITGB2, NOC2L, RAPGEFL1, LFNG, PPP3CC, LGALS1, FCGRT, GSG2, BSG, PALM, PRKACA, JAK3, SEMA6B, EGFL7, RFC2, RHBDF2, IL17RA, ARHGAP45, HSH2D, DDIT4, ADGRB1, MYH9, ATP6V0D1, DBN1, GRID2IP, ANAPC2, LY6E, RTN4R, PTTG1IP, RASAL3, RASGRP2, PRKCZ, RASIP1, PRAM1, ZFP36L2, NCLN, RXRA, GNG7, DVL1, GNA12, RHPN1, GSDMD, HEXIM1, INSR, MIB2, ARID3A, PPP1CA, TFAP4, LPAR5, CLCF1, AGO2, LTBR,…	110	6275	16792	1.36234	0.999902	0.652903	0.652903
GOTERM_BP_ALL	GO:0009725~response to hormone	14	11.2	0.00355464	CDKN1A, SLC27A1, INSR, PRKCZ, ZFP36L2, TFAP4, RXRA, GNG7, BSG, DDIT4, ATP6V0D1, PRKACA, JAK3, JUNB	110	854	16792	2.50253	0.999914	0.652903	0.652903
GOTERM_BP_ALL	GO:0048523~negative regulation of cellular process	42	33.6	0.00370633	RTN4R, CDKN1A, SLC27A1, ELL, UHRF1, ADARB1, PTTG1IP, RASAL3, NOC2L, PRKCZ, TRIOBP, RASIP1, ZFP36L2, LFNG, RXRA, LGALS1, PALM, DVL1, TNRC18, PRKACA, JAK3, JUNB, BAHCC1, SEMA6B, HEXIM1, EGFL7, RHBDF2, ARID3A, MEX3D, ATAD3A, HSH2D, TFAP4, COL5A1, CLCF1, DDIT4, AGO2, ADGRB1, MYH9, AURKAIP1, ZFPM1, GRID2IP, ANAPC2	110	4300	16792	1.49104	0.999942	0.652903	0.652903
GOTERM_BP_ALL	GO:0002521~leukocyte differentiation	10	8	0.00371743	LFNG, LGALS1, CLCF1, MYH9, LTBR, JAK3, PRKCZ, ZFPM1, JUNB, ZFP36L2	110	474	16792	3.22056	0.999944	0.652903	0.652903
GOTERM_BP_ALL	GO:0032268~regulation of cellular protein metabolic process	27	21.6	0.00380684	RTN4R, CDKN1A, SLC27A1, UHRF1, ITGB2, ADARB1, PTTG1IP, NOC2L, PRKCZ, ZFP36L2, RXRA, GNA12, DVL1, PRKACA, HEXIM1, INSR, MEX3D, PPP1CA, TFAP4, CLCF1, DDIT4, AGO2, MYH9, LTBR, AURKAIP1, RNF166, ANAPC2	110	2346	16792	1.75689	0.999956	0.652903	0.652903
GOTERM_BP_ALL	GO:0048522~positive regulation of cellular process	45	36	0.0042077	CDKN1A, SLC27A1, ANKLE1, ELL, UHRF1, ITGB2, ADARB1, PTTG1IP, RASAL3, PRKCZ, TRIOBP, ZFP36L2, LFNG, PPP3CC, RXRA, LGALS1, PALM, DVL1, PRKACA, JAK3, JUNB, SEMA6B, VASP, GSDMD, HEXIM1, EGFL7, RFC2, METRN, INSR, MIB2, ARID3A, IL17RA, PPP1CA, HSH2D, TFAP4, CLCF1, DDIT4, AGO2, ADGRB1, MYH9, LTBR, AURKAIP1, ZFPM1, RNF166, ANAPC2	110	4744	16792	1.44803	0.999985	0.652903	0.652903
GOTERM_BP_ALL	GO:0050793~regulation of developmental process	25	20	0.00449738	RTN4R, ITGB2, PRKCZ, TRIOBP, ZFP36L2, LFNG, RXRA, LGALS1, PALM, GNA12, DVL1, PRKACA, JAK3, SEMA6B, GAMT, METRN, INSR, FMNL1, COL5A1, CLCF1, ADGRB1, MYH9, ZFPM1, DBN1, ANAPC2	110	2129	16792	1.79256	0.999993	0.652903	0.652903
GOTERM_BP_ALL	GO:0072331~signal transduction by p53 class mediator	6	4.8	0.0045461	HEXIM1, CDKN1A, TFAP4, DDIT4, ARID3A, PTTG1IP	110	166	16792	5.51763	0.999994	0.652903	0.652903
GOTERM_BP_ALL	GO:0007159~leukocyte cell-cell adhesion	10	8	0.00467442	LFNG, HSH2D, LGALS1, ITGB2, MYH9, RASAL3, JAK3, PRKCZ, ZFPM1, ZFP36L2	110	491	16792	3.10905	0.999996	0.652903	0.652903
GOTERM_BP_ALL	GO:0051246~regulation of protein metabolic process	28	22.4	0.00481041	RTN4R, CDKN1A, SLC27A1, UHRF1, ITGB2, ADARB1, PTTG1IP, NOC2L, PRKCZ, ZFP36L2, RXRA, GNA12, DVL1, PRKACA, HEXIM1, INSR, MEX3D, PPP1CA, TFAP4, CLCF1, DDIT4, AGO2, MYH9, LTBR, AURKAIP1, ZFPM1, RNF166, ANAPC2	110	2512	16792	1.70156	0.999997	0.652903	0.652903
GOTERM_BP_ALL	GO:0023052~signaling	55	44	0.00582299	GPSM1, CDKN1A, SLC27A1, ITGB2, NOC2L, RAPGEFL1, LFNG, PPP3CC, LGALS1, FCGRT, GSG2, BSG, PALM, PRKACA, JAK3, SEMA6B, EGFL7, RFC2, RHBDF2, IL17RA, ARHGAP45, HSH2D, DDIT4, ADGRB1, MYH9, ATP6V0D1, DBN1, GRID2IP, ANAPC2, LY6E, RTN4R, PTTG1IP, RASAL3, RASGRP2, PRKCZ, RASIP1, PRAM1, ZFP36L2, NCLN, RXRA, GNG7, DVL1, GNA12, RHPN1, HEXIM1, INSR, MIB2, ARID3A, PPP1CA, TFAP4, LPAR5, CLCF1, AGO2, LTBR, PLCD3	110	6260	16792	1.34121	1	0.652903	0.652903
GOTERM_BP_ALL	GO:0051128~regulation of cellular component organization	26	20.8	0.00672917	RTN4R, CDKN1A, UHRF1, ITGB2, NOC2L, RASGRP2, PRKCZ, TRIOBP, PPP3CC, NCLN, LGALS1, PALM, GNA12, DVL1, PRKACA, SEMA6B, VASP, METRN, INSR, FMNL1, COL5A1, ADGRB1, MYH9, AURKAIP1, DBN1, ANAPC2	110	2323	16792	1.70857	1	0.652903	0.652903
GOTERM_BP_ALL	GO:0048583~regulation of response to stimulus	36	28.8	0.00720404	GPSM1, RTN4R, ANKLE1, ITGB2, PTTG1IP, RASAL3, NOC2L, PRKCZ, PRAM1, LFNG, PPP3CC, NCLN, LGALS1, FCGRT, GNG7, PALM, GNA12, DVL1, PRKACA, JAK3, LAIR1, SEMA6B, HEXIM1, EGFL7, RFC2, INSR, RHBDF2, MIB2, IL17RA, ARHGAP45, PPP1CA, HSH2D, TFAP4, CLCF1, DDIT4, LTBR	110	3636	16792	1.51143	1	0.652903	0.652903
GOTERM_BP_ALL	GO:0045995~regulation of embryonic development	5	4	0.00731726	LFNG, COL5A1, INSR, DVL1, PRKACA	110	118	16792	6.46841	1	0.652903	0.652903
GOTERM_BP_ALL	GO:0002376~immune system process	27	21.6	0.00734399	CDKN1A, ITGB2, ADARB1, RASAL3, PRKCZ, PRAM1, ZFP36L2, LILRA5, LFNG, LGALS1, FCGRT, BSG, PRKACA, JAK3, JUNB, LAIR1, GSDMD, TUBB4B, IL17RA, SLC7A5, HSH2D, CLCF1, DDIT4, ORAI1, MYH9, LTBR, ZFPM1	110	2465	16792	1.67208	1	0.652903	0.652903
GOTERM_BP_ALL	GO:0030154~cell differentiation	36	28.8	0.00772878	GPSM1, RTN4R, CDKN1A, ITGB2, PRKCZ, TRIOBP, RASIP1, ZFP36L2, PCSK4, RPS15, LFNG, RXRA, LGALS1, PALM, GNA12, DVL1, RPS11, PRKACA, JAK3, JUNB, SEMA6B, VASP, TMEM120B, EGFL7, METRN, RMDN3, SLC7A5, COL5A1, CLCF1, DDIT4, ADGRB1, MYH9, LTBR, ZFPM1, DBN1, ANAPC2	110	3652	16792	1.50481	1	0.652903	0.652903
GOTERM_BP_ALL	GO:0022603~regulation of anatomical structure morphogenesis	15	12	0.0080107	SEMA6B, RTN4R, METRN, ITGB2, TRIOBP, LFNG, FMNL1, RXRA, COL5A1, PALM, GNA12, DVL1, ADGRB1, MYH9, ANAPC2	110	1051	16792	2.1787	1	0.652903	0.652903
GOTERM_BP_ALL	GO:0044700~single organism signaling	54	43.2	0.00822082	GPSM1, CDKN1A, SLC27A1, ITGB2, NOC2L, RAPGEFL1, LFNG, PPP3CC, LGALS1, FCGRT, GSG2, BSG, PALM, PRKACA, JAK3, SEMA6B, EGFL7, RFC2, RHBDF2, IL17RA, ARHGAP45, HSH2D, DDIT4, ADGRB1, MYH9, ATP6V0D1, DBN1, GRID2IP, ANAPC2, LY6E, RTN4R, PTTG1IP, RASAL3, RASGRP2, PRKCZ, RASIP1, PRAM1, ZFP36L2, RXRA, GNG7, DVL1, GNA12, RHPN1, HEXIM1, INSR, MIB2, ARID3A, PPP1CA, TFAP4, LPAR5, CLCF1, AGO2, LTBR, PLCD3	110	6207	16792	1.32807	1	0.652903	0.652903
GOTERM_BP_ALL	GO:0007165~signal transduction	51	40.8	0.008413	GPSM1, CDKN1A, SLC27A1, ITGB2, NOC2L, RAPGEFL1, LFNG, PPP3CC, LGALS1, FCGRT, GSG2, BSG, PALM, PRKACA, JAK3, SEMA6B, EGFL7, RFC2, RHBDF2, IL17RA, ARHGAP45, HSH2D, DDIT4, ADGRB1, MYH9, ATP6V0D1, LY6E, RTN4R, PTTG1IP, RASAL3, RASGRP2, PRKCZ, RASIP1, PRAM1, ZFP36L2, RXRA, GNG7, DVL1, GNA12, RHPN1, HEXIM1, INSR, MIB2, ARID3A, PPP1CA, TFAP4, LPAR5, CLCF1, AGO2, LTBR, PLCD3	110	5775	16792	1.34812	1	0.652903	0.652903
GOTERM_BP_ALL	GO:0042110~T cell activation	9	7.2	0.00855729	LFNG, HSH2D, LGALS1, MYH9, RASAL3, JAK3, PRKCZ, ZFPM1, ZFP36L2	110	446	16792	3.08047	1	0.652903	0.652903
GOTERM_BP_ALL	GO:0070489~T cell aggregation	9	7.2	0.00855729	LFNG, HSH2D, LGALS1, MYH9, RASAL3, JAK3, PRKCZ, ZFPM1, ZFP36L2	110	446	16792	3.08047	1	0.652903	0.652903
GOTERM_BP_ALL	GO:0031331~positive regulation of cellular catabolic process	7	5.6	0.00863054	INSR, AGO2, DVL1, PTTG1IP, ZFP36L2, RNF166, ANAPC2	110	272	16792	3.92861	1	0.652903	0.652903
GOTERM_BP_ALL	GO:0071593~lymphocyte aggregation	9	7.2	0.00866729	LFNG, HSH2D, LGALS1, MYH9, RASAL3, JAK3, PRKCZ, ZFPM1, ZFP36L2	110	447	16792	3.07358	1	0.652903	0.652903
GOTERM_BP_ALL	GO:0009790~embryo development	14	11.2	0.00882385	VASP, ELL, ITGB2, LFNG, RXRA, COL5A1, GNA12, DVL1, MYH9, PLCD3, PRKACA, JUNB, POLE, ZFPM1	110	954	16792	2.24021	1	0.652903	0.652903
GOTERM_BP_ALL	GO:0065008~regulation of biological quality	35	28	0.0088268	RTN4R, CDKN1A, SLC27A1, ITGB2, PRKCZ, TRIOBP, ZFP36L2, PPP3CC, NCLN, RXRA, LGALS1, PALM, GNA12, DVL1, QSOX2, PRKACA, JAK3, POLE, SEMA6B, VASP, GSDMD, RFC2, INSR, RMDN3, MEX3D, HSH2D, FMNL1, TFAP4, ADGRB1, MYH9, ATP6V0D1, ZFPM1, DBN1, GRID2IP, ANAPC2	110	3548	16792	1.50589	1	0.652903	0.652903
GOTERM_BP_ALL	GO:0010646~regulation of cell communication	31	24.8	0.00894045	GPSM1, RTN4R, PTTG1IP, RASAL3, NOC2L, PRKCZ, LFNG, PPP3CC, NCLN, LGALS1, GNG7, PALM, GNA12, DVL1, PRKACA, HEXIM1, EGFL7, RFC2, INSR, RHBDF2, MIB2, ARHGAP45, PPP1CA, HSH2D, TFAP4, CLCF1, DDIT4, LTBR, DBN1, GRID2IP, ANAPC2	110	3020	16792	1.56698	1	0.652903	0.652903
GOTERM_BP_ALL	GO:0009653~anatomical structure morphogenesis	28	22.4	0.00894387	RTN4R, ITGB2, PRKCZ, TRIOBP, RASIP1, LFNG, RXRA, PALM, GNA12, BSG, DVL1, PRKACA, JUNB, SEMA6B, GAMT, VASP, EGFL7, METRN, INSR, PPP1CA, FMNL1, COL5A1, ADGRB1, MYH9, PLCD3, ATP6V0D1, ZFPM1, ANAPC2	110	2631	16792	1.6246	1	0.652903	0.652903
GOTERM_BP_ALL	GO:0070486~leukocyte aggregation	9	7.2	0.00946727	LFNG, HSH2D, LGALS1, MYH9, RASAL3, JAK3, PRKCZ, ZFPM1, ZFP36L2	110	454	16792	3.02619	1	0.657305	0.657305
GOTERM_BP_ALL	GO:0048869~cellular developmental process	38	30.4	0.0103022	GPSM1, RTN4R, CDKN1A, ITGB2, PRKCZ, TRIOBP, RASIP1, ZFP36L2, PCSK4, RPS15, LFNG, RXRA, LGALS1, PALM, GNA12, DVL1, RPS11, PRKACA, JAK3, JUNB, SEMA6B, VASP, TMEM120B, EGFL7, METRN, RMDN3, SLC7A5, FMNL1, COL5A1, CLCF1, DDIT4, ADGRB1, MYH9, LTBR, ATP6V0D1, ZFPM1, DBN1, ANAPC2	110	3992	16792	1.45312	1	0.657305	0.657305
GOTERM_BP_ALL	GO:0007049~cell cycle	20	16	0.0109071	HEXIM1, CDT1, CDKN1A, ANKLE1, TTYH1, UHRF1, INSR, ARID3A, TUBB4B, TRIOBP, ZFP36L2, PPP1CA, LFNG, TFAP4, GSG2, MYH9, AURKAIP1, PRKACA, POLE, ANAPC2	110	1672	16792	1.82601	1	0.657305	0.657305
GOTERM_BP_ALL	GO:0023051~regulation of signaling	31	24.8	0.0112352	GPSM1, RTN4R, PTTG1IP, RASAL3, NOC2L, PRKCZ, LFNG, PPP3CC, NCLN, LGALS1, GNG7, PALM, GNA12, DVL1, PRKACA, HEXIM1, EGFL7, RFC2, INSR, RHBDF2, MIB2, ARHGAP45, PPP1CA, HSH2D, TFAP4, CLCF1, DDIT4, LTBR, DBN1, GRID2IP, ANAPC2	110	3070	16792	1.54146	1	0.657305	0.657305
GOTERM_BP_ALL	GO:0048731~system development	40	32	0.0112922	GPSM1, RTN4R, CDKN1A, ITGB2, PRKCZ, RASIP1, ZFP36L2, RAPGEFL1, LFNG, PPP3CC, RXRA, LGALS1, PALM, BSG, DVL1, PRKACA, JAK3, JUNB, POLE, SEMA6B, GAMT, VASP, HEXIM1, EGFL7, METRN, INSR, PPP1CA, SLC7A5, COL5A1, CLCF1, DDIT4, ADGRB1, ORAI1, MYH9, LTBR, PLCD3, ATP6V0D1, ZFPM1, DBN1, ANAPC2	110	4291	16792	1.42302	1	0.657305	0.657305
GOTERM_BP_ALL	GO:0022604~regulation of cell morphogenesis	10	8	0.0116241	SEMA6B, RTN4R, FMNL1, METRN, GNA12, PALM, ITGB2, MYH9, TRIOBP, ANAPC2	110	568	16792	2.68758	1	0.657305	0.657305
GOTERM_BP_ALL	GO:0045992~negative regulation of embryonic development	3	2.4	0.0122583	LFNG, COL5A1, PRKACA	110	26	16792	17.614	1	0.657305	0.657305
GOTERM_BP_ALL	GO:0098602~single organism cell adhesion	12	9.6	0.0123129	LFNG, HSH2D, LGALS1, TTYH1, ITGB2, MYH9, RASAL3, JAK3, PRKCZ, ZFPM1, TRIOBP, ZFP36L2	110	779	16792	2.35155	1	0.657305	0.657305
GOTERM_BP_ALL	GO:0002366~leukocyte activation involved in immune response	6	4.8	0.0123978	LFNG, LGALS1, CLCF1, JAK3, PRKCZ, ZFPM1	110	212	16792	4.32041	1	0.657305	0.657305
GOTERM_BP_ALL	GO:1903047~mitotic cell cycle process	13	10.4	0.0127191	CDT1, CDKN1A, TTYH1, INSR, ARID3A, TUBB4B, TRIOBP, ZFP36L2, GSG2, AURKAIP1, PRKACA, POLE, ANAPC2	110	890	16792	2.22979	1	0.657305	0.657305
GOTERM_BP_ALL	GO:0043009~chordate embryonic development	10	8	0.0127778	VASP, LFNG, RXRA, ELL, GNA12, DVL1, MYH9, PLCD3, PRKACA, JUNB	110	577	16792	2.64566	1	0.657305	0.657305
GOTERM_BP_ALL	GO:0002263~cell activation involved in immune response	6	4.8	0.0128689	LFNG, LGALS1, CLCF1, JAK3, PRKCZ, ZFPM1	110	214	16792	4.28003	1	0.657305	0.657305
GOTERM_BP_ALL	GO:0031400~negative regulation of protein modification process	10	8	0.0129111	RTN4R, HEXIM1, CDKN1A, TFAP4, DDIT4, DVL1, ADARB1, NOC2L, PRKCZ, ANAPC2	110	578	16792	2.64108	1	0.657305	0.657305
GOTERM_BP_ALL	GO:1990138~neuron projection extension	5	4	0.0134393	SEMA6B, RTN4R, DVL1, PRKCZ, ANAPC2	110	141	16792	5.41328	1	0.657305	0.657305
GOTERM_BP_ALL	GO:0009792~embryo development ending in birth or egg hatching	10	8	0.0135932	VASP, LFNG, RXRA, ELL, GNA12, DVL1, MYH9, PLCD3, PRKACA, JUNB	110	583	16792	2.61843	1	0.657305	0.657305
GOTERM_BP_ALL	GO:0048519~negative regulation of biological process	42	33.6	0.0137758	RTN4R, CDKN1A, SLC27A1, ELL, UHRF1, ADARB1, PTTG1IP, RASAL3, NOC2L, PRKCZ, TRIOBP, RASIP1, ZFP36L2, LFNG, RXRA, LGALS1, PALM, DVL1, TNRC18, PRKACA, JAK3, JUNB, BAHCC1, SEMA6B, HEXIM1, EGFL7, RHBDF2, ARID3A, MEX3D, ATAD3A, HSH2D, TFAP4, COL5A1, CLCF1, DDIT4, AGO2, ADGRB1, MYH9, AURKAIP1, ZFPM1, GRID2IP, ANAPC2	110	4623	16792	1.38687	1	0.657305	0.657305
GOTERM_BP_ALL	GO:0000902~cell morphogenesis	16	12.8	0.0140383	SEMA6B, VASP, RTN4R, METRN, ITGB2, PRKCZ, TRIOBP, FMNL1, PALM, GNA12, DVL1, ADGRB1, MYH9, ATP6V0D1, ZFPM1, ANAPC2	110	1240	16792	1.96974	1	0.657305	0.657305
GOTERM_BP_ALL	GO:0022402~cell cycle process	17	13.6	0.0140926	CDT1, CDKN1A, ANKLE1, TTYH1, INSR, ARID3A, TUBB4B, TRIOBP, ZFP36L2, LFNG, TFAP4, GSG2, MYH9, AURKAIP1, PRKACA, POLE, ANAPC2	110	1357	16792	1.9124	1	0.657305	0.657305
GOTERM_BP_ALL	GO:0001933~negative regulation of protein phosphorylation	8	6.4	0.0141439	RTN4R, HEXIM1, CDKN1A, TFAP4, DDIT4, DVL1, ADARB1, PRKCZ	110	393	16792	3.10747	1	0.657305	0.657305
GOTERM_BP_ALL	GO:0009966~regulation of signal transduction	28	22.4	0.0141952	GPSM1, RTN4R, PTTG1IP, RASAL3, NOC2L, PRKCZ, LFNG, PPP3CC, NCLN, LGALS1, GNG7, PALM, GNA12, DVL1, PRKACA, HEXIM1, EGFL7, RFC2, INSR, RHBDF2, MIB2, ARHGAP45, PPP1CA, HSH2D, TFAP4, CLCF1, DDIT4, LTBR	110	2728	16792	1.56684	1	0.657305	0.657305
GOTERM_BP_ALL	GO:2000026~regulation of multicellular organismal development	20	16	0.0145244	SEMA6B, RTN4R, METRN, INSR, ITGB2, PRKCZ, ZFP36L2, LFNG, RXRA, LGALS1, COL5A1, CLCF1, PALM, DVL1, ADGRB1, PRKACA, JAK3, ZFPM1, DBN1, ANAPC2	110	1721	16792	1.77402	1	0.657305	0.657305
GOTERM_BP_ALL	GO:0050789~regulation of biological process	83	66.4	0.0145696	ZNF512B, GPSM1, CDKN1A, SLC27A1, ANKLE1, ELL, ITGB2, ADARB1, NOC2L, TRIOBP, RAPGEFL1, LFNG, PPP3CC, LGALS1, FCGRT, GSG2, BSG, PALM, QSOX2, PRKACA, JAK3, JUNB, BAHCC1, SEMA6B, GAMT, EGFL7, METRN, RFC2, RHBDF2, ATAD3A, IL17RA, ARHGAP45, HSH2D, DDIT4, ADGRB1, ORAI1, MYH9, ATP6V0D1, AURKAIP1, ZFPM1, RNF166, DBN1, GRID2IP, ANAPC2, LY6E, RTN4R, TTYH1, UHRF1, PTTG1IP, RASAL3, RASGRP2, PRKCZ, RASIP1, PRA…	110	10922	16792	1.16007	1	0.657305	0.657305
GOTERM_BP_ALL	GO:0008360~regulation of cell shape	5	4	0.0147568	FMNL1, GNA12, PALM, ITGB2, MYH9	110	145	16792	5.26395	1	0.657305	0.657305
GOTERM_BP_ALL	GO:0070229~negative regulation of lymphocyte apoptotic process	3	2.4	0.0151215	HSH2D, NOC2L, JAK3	110	29	16792	15.7918	1	0.660857	0.660857
GOTERM_BP_ALL	GO:0010564~regulation of cell cycle process	10	8	0.0153395	CDT1, CDKN1A, TFAP4, INSR, GSG2, ARID3A, AURKAIP1, PRKACA, ZFP36L2, ANAPC2	110	595	16792	2.56562	1	0.660857	0.660857
GOTERM_BP_ALL	GO:0030098~lymphocyte differentiation	7	5.6	0.015657	LFNG, LGALS1, CLCF1, JAK3, PRKCZ, ZFPM1, ZFP36L2	110	310	16792	3.44704	1	0.66191	0.66191
GOTERM_BP_ALL	GO:0001893~maternal placenta development	3	2.4	0.0161337	RXRA, BSG, JUNB	110	30	16792	15.2655	1	0.66191	0.66191
GOTERM_BP_ALL	GO:0016043~cellular component organization	52	41.6	0.016162	CDKN1A, ANKLE1, ITGB2, MUM1, NOC2L, TRIOBP, MRPL4, RPS15, LFNG, PPP3CC, LGALS1, GSG2, BSG, PALM, RPS11, PRKACA, TNPO2, POLE, BAHCC1, SEMA6B, METRN, RFC2, POLRMT, DDIT4, ADGRB1, MYH9, ATP6V0D1, AURKAIP1, ZFPM1, DBN1, ANAPC2, PLEC, RTN4R, TTYH1, UHRF1, RASGRP2, PRKCZ, NCLN, RXRA, DVL1, GNA12, TNRC18, GSDMD, VASP, TMEM120B, INSR, TUBB4B, PPP1CA, FMNL1, TFAP4, COL5A1, AGO2	110	6109	16792	1.2994	1	0.66191	0.66191
GOTERM_BP_ALL	GO:0043434~response to peptide hormone	8	6.4	0.0164251	SLC27A1, GNG7, INSR, BSG, ATP6V0D1, PRKACA, JAK3, PRKCZ	110	405	16792	3.0154	1	0.66191	0.66191
GOTERM_BP_ALL	GO:0071840~cellular component organization or biogenesis	53	42.4	0.0166233	CDKN1A, ANKLE1, ITGB2, MUM1, NOC2L, TRIOBP, MRPL4, RPS15, LFNG, PPP3CC, LGALS1, GSG2, BSG, PALM, RPS11, PRKACA, TNPO2, POLE, BAHCC1, SEMA6B, METRN, RFC2, POLRMT, DDIT4, ADGRB1, MYH9, ATP6V0D1, AURKAIP1, ZFPM1, DBN1, ANAPC2, PLEC, RTN4R, TTYH1, UHRF1, NOC4L, RASGRP2, PRKCZ, NCLN, RXRA, DVL1, GNA12, TNRC18, GSDMD, VASP, TMEM120B, INSR, TUBB4B, PPP1CA, FMNL1, TFAP4, COL5A1, AGO2	110	6265	16792	1.29141	1	0.66191	0.66191
GOTERM_BP_ALL	GO:0045736~negative regulation of cyclin-dependent protein serine/threonine kinase activity	3	2.4	0.0171741	HEXIM1, CDKN1A, TFAP4	110	31	16792	14.773	1	0.663727	0.663727
GOTERM_BP_ALL	GO:1904030~negative regulation of cyclin-dependent protein kinase activity	3	2.4	0.0171741	HEXIM1, CDKN1A, TFAP4	110	31	16792	14.773	1	0.663727	0.663727
GOTERM_BP_ALL	GO:0010975~regulation of neuron projection development	8	6.4	0.0180842	SEMA6B, RTN4R, LGALS1, METRN, PALM, DVL1, DBN1, ANAPC2	110	413	16792	2.95699	1	0.665919	0.665919
GOTERM_BP_ALL	GO:0051248~negative regulation of protein metabolic process	14	11.2	0.0182893	RTN4R, HEXIM1, CDKN1A, ADARB1, NOC2L, MEX3D, PRKCZ, ZFP36L2, TFAP4, DDIT4, AGO2, DVL1, ZFPM1, ANAPC2	110	1049	16792	2.03733	1	0.665919	0.665919
GOTERM_BP_ALL	GO:0098609~cell-cell adhesion	15	12	0.0183221	VASP, TTYH1, ITGB2, RASAL3, PRKCZ, ZFP36L2, LFNG, HSH2D, LGALS1, BSG, MYH9, JAK3, ZFPM1, DBN1, PLEC	110	1164	16792	1.9672	1	0.665919	0.665919
GOTERM_BP_ALL	GO:0035556~intracellular signal transduction	27	21.6	0.0185719	RTN4R, CDKN1A, PTTG1IP, RASAL3, NOC2L, RASGRP2, PRKCZ, ZFP36L2, RAPGEFL1, LGALS1, GSG2, GNA12, DVL1, PRKACA, JAK3, HEXIM1, RFC2, INSR, MIB2, ARID3A, ARHGAP45, TFAP4, CLCF1, DDIT4, AGO2, LTBR, PLCD3	110	2657	16792	1.55125	1	0.665919	0.665919
GOTERM_BP_ALL	GO:0048518~positive regulation of biological process	46	36.8	0.0190552	CDKN1A, SLC27A1, ANKLE1, ELL, UHRF1, ITGB2, ADARB1, PTTG1IP, RASAL3, PRKCZ, TRIOBP, ZFP36L2, LFNG, PPP3CC, RXRA, LGALS1, PALM, DVL1, PRKACA, JAK3, JUNB, SEMA6B, VASP, GSDMD, HEXIM1, EGFL7, RFC2, METRN, INSR, MIB2, ARID3A, IL17RA, PPP1CA, HSH2D, TFAP4, CLCF1, DDIT4, AGO2, ADGRB1, ORAI1, MYH9, LTBR, AURKAIP1, ZFPM1, RNF166, ANAPC2	110	5285	16792	1.32869	1	0.665919	0.665919
GOTERM_BP_ALL	GO:0006469~negative regulation of protein kinase activity	6	4.8	0.019181	RTN4R, HEXIM1, CDKN1A, TFAP4, DVL1, ADARB1	110	237	16792	3.86467	1	0.665919	0.665919
GOTERM_BP_ALL	GO:0016337~single organismal cell-cell adhesion	11	8.8	0.0194117	LFNG, HSH2D, LGALS1, TTYH1, ITGB2, MYH9, RASAL3, JAK3, PRKCZ, ZFPM1, ZFP36L2	110	725	16792	2.31614	1	0.665919	0.665919
GOTERM_BP_ALL	GO:0072359~circulatory system development	13	10.4	0.0195113	HEXIM1, EGFL7, INSR, ITGB2, RASIP1, RXRA, COL5A1, DVL1, ADGRB1, MYH9, PLCD3, JUNB, ZFPM1	110	945	16792	2.10001	1	0.665919	0.665919
GOTERM_BP_ALL	GO:0072358~cardiovascular system development	13	10.4	0.0195113	HEXIM1, EGFL7, INSR, ITGB2, RASIP1, RXRA, COL5A1, DVL1, ADGRB1, MYH9, PLCD3, JUNB, ZFPM1	110	945	16792	2.10001	1	0.665919	0.665919
GOTERM_BP_ALL	GO:0051716~cellular response to stimulus	57	45.6	0.0204915	GPSM1, CDKN1A, SLC27A1, ANKLE1, ITGB2, MUM1, NOC2L, RAPGEFL1, LFNG, PPP3CC, LGALS1, FCGRT, GSG2, BSG, PALM, PRKACA, JAK3, JUNB, POLE, SEMA6B, EGFL7, RFC2, RHBDF2, IL17RA, ARHGAP45, HSH2D, DDIT4, ADGRB1, MYH9, ATP6V0D1, LY6E, RTN4R, UHRF1, PTTG1IP, RASAL3, RASGRP2, PRKCZ, RASIP1, PRAM1, ZFP36L2, RXRA, GNG7, DVL1, GNA12, RHPN1, GSDMD, HEXIM1, INSR, MIB2, ARID3A, PPP1CA, TFAP4, LPAR5, CLCF1, AGO2, L…	110	6927	16792	1.25614	1	0.681007	0.681007
GOTERM_BP_ALL	GO:0007275~multicellular organism development	43	34.4	0.0205226	GPSM1, RTN4R, CDKN1A, ELL, ITGB2, PRKCZ, RASIP1, ZFP36L2, RAPGEFL1, LFNG, PPP3CC, RXRA, LGALS1, PALM, GNA12, BSG, DVL1, PRKACA, JAK3, JUNB, POLE, SEMA6B, GAMT, VASP, HEXIM1, EGFL7, METRN, INSR, PPP1CA, SLC7A5, COL5A1, CLCF1, DDIT4, AGO2, ADGRB1, ORAI1, MYH9, LTBR, PLCD3, ATP6V0D1, ZFPM1, DBN1, ANAPC2	110	4877	16792	1.34594	1	0.681007	0.681007
GOTERM_BP_ALL	GO:0016477~cell migration	15	12	0.0209024	SEMA6B, INSR, ITGB2, ADARB1, PRKCZ, IL17RA, SLC7A5, FMNL1, TMEM201, COL5A1, BSG, DDIT4, GNA12, MYH9, JAK3	110	1184	16792	1.93397	1	0.681007	0.681007
GOTERM_BP_ALL	GO:0009896~positive regulation of catabolic process	7	5.6	0.0214465	INSR, AGO2, DVL1, PTTG1IP, ZFP36L2, RNF166, ANAPC2	110	333	16792	3.20895	1	0.681007	0.681007
GOTERM_BP_ALL	GO:0065007~biological regulation	86	68.8	0.0214926	ZNF512B, GPSM1, CDKN1A, SLC27A1, ANKLE1, ELL, ITGB2, ADARB1, NOC2L, TRIOBP, RAPGEFL1, LFNG, PPP3CC, LGALS1, FCGRT, GSG2, BSG, PALM, QSOX2, PRKACA, JAK3, JUNB, POLE, BAHCC1, SEMA6B, GAMT, EGFL7, METRN, RFC2, RHBDF2, ATAD3A, IL17RA, ARHGAP45, HSH2D, DDIT4, ADGRB1, ORAI1, MYH9, ATP6V0D1, AURKAIP1, ZFPM1, RNF166, DBN1, GRID2IP, ANAPC2, LY6E, RTN4R, TTYH1, UHRF1, DENND3, PTTG1IP, RASAL3, RASGRP2, PRKC…	110	11548	16792	1.13685	1	0.681007	0.681007
GOTERM_BP_ALL	GO:0042326~negative regulation of phosphorylation	8	6.4	0.0215082	RTN4R, HEXIM1, CDKN1A, TFAP4, DDIT4, DVL1, ADARB1, PRKCZ	110	428	16792	2.85336	1	0.681007	0.681007
GOTERM_BP_ALL	GO:0042113~B cell activation	6	4.8	0.0221225	LFNG, CDKN1A, LGALS1, CLCF1, JAK3, ZFP36L2	110	246	16792	3.72328	1	0.687846	0.687846
GOTERM_BP_ALL	GO:0050896~response to stimulus	66	52.8	0.0222477	GPSM1, CDKN1A, SLC27A1, ANKLE1, ITGB2, MUM1, ADARB1, NOC2L, RAPGEFL1, LFNG, PPP3CC, LGALS1, FCGRT, GSG2, BSG, PALM, PRKACA, JAK3, JUNB, POLE, SEMA6B, EGFL7, RFC2, RHBDF2, IL17RA, ARHGAP45, HSH2D, DDIT4, ADGRB1, ORAI1, MYH9, ATP6V0D1, ZFPM1, LY6E, RTN4R, UHRF1, PTTG1IP, RASAL3, RASGRP2, PRKCZ, RASIP1, PRAM1, ZFP36L2, LILRA5, NCLN, RXRA, GNG7, DVL1, GNA12, RHPN1, LAIR1, GSDMD, VASP, HEXIM1, INSR, M…	110	8329	16792	1.20965	1	0.687846	0.687846
GOTERM_BP_ALL	GO:0000278~mitotic cell cycle	13	10.4	0.0230469	CDT1, CDKN1A, TTYH1, INSR, ARID3A, TUBB4B, TRIOBP, ZFP36L2, GSG2, AURKAIP1, PRKACA, POLE, ANAPC2	110	968	16792	2.05011	1	0.701976	0.701976
GOTERM_BP_ALL	GO:0032989~cellular component morphogenesis	16	12.8	0.0235198	SEMA6B, VASP, RTN4R, METRN, ITGB2, PRKCZ, TRIOBP, FMNL1, PALM, GNA12, DVL1, ADGRB1, MYH9, ATP6V0D1, ZFPM1, ANAPC2	110	1321	16792	1.84896	1	0.701976	0.701976
GOTERM_BP_ALL	GO:1903362~regulation of cellular protein catabolic process	6	4.8	0.0238769	GNA12, DVL1, PTTG1IP, PRKACA, RNF166, ANAPC2	110	251	16792	3.64911	1	0.701976	0.701976
GOTERM_BP_ALL	GO:0043241~protein complex disassembly	6	4.8	0.0242383	MRPL4, DDIT4, DVL1, AURKAIP1, TRIOBP, PPP1CA	110	252	16792	3.63463	1	0.701976	0.701976
GOTERM_BP_ALL	GO:0051726~regulation of cell cycle	13	10.4	0.0243821	HEXIM1, CDT1, CDKN1A, INSR, ARID3A, ADARB1, ZFP36L2, TFAP4, GSG2, AURKAIP1, PRKACA, JUNB, ANAPC2	110	976	16792	2.03331	1	0.701976	0.701976
GOTERM_BP_ALL	GO:0044265~cellular macromolecule catabolic process	13	10.4	0.0243821	UHRF1, DENND3, PTTG1IP, ZFP36L2, RPS15, LSM7, GNA12, AGO2, DVL1, RPS11, PRKACA, RNF166, ANAPC2	110	976	16792	2.03331	1	0.701976	0.701976
GOTERM_BP_ALL	GO:0033673~negative regulation of kinase activity	6	4.8	0.0249716	RTN4R, HEXIM1, CDKN1A, TFAP4, DVL1, ADARB1	110	254	16792	3.60601	1	0.701976	0.701976
GOTERM_BP_ALL	GO:0007155~cell adhesion	19	15.2	0.0251953	VASP, EGFL7, TTYH1, ITGB2, RASAL3, PRKCZ, TRIOBP, ZFP36L2, LFNG, HSH2D, LGALS1, COL5A1, BSG, ADGRB1, MYH9, JAK3, ZFPM1, DBN1, PLEC	110	1699	16792	1.70714	1	0.701976	0.701976
GOTERM_BP_ALL	GO:1901652~response to peptide	8	6.4	0.0256335	SLC27A1, GNG7, INSR, BSG, ATP6V0D1, PRKACA, JAK3, PRKCZ	110	444	16792	2.75053	1	0.701976	0.701976
GOTERM_BP_ALL	GO:0006659~phosphatidylserine biosynthetic process	2	1.6	0.0257153	PTDSS2, SLC27A1	110	4	16792	76.3273	1	0.701976	0.701976
GOTERM_BP_ALL	GO:2000664~positive regulation of interleukin-5 secretion	2	1.6	0.0257153	PRKCZ, IL17RA	110	4	16792	76.3273	1	0.701976	0.701976
GOTERM_BP_ALL	GO:0022610~biological adhesion	19	15.2	0.0259945	VASP, EGFL7, TTYH1, ITGB2, RASAL3, PRKCZ, TRIOBP, ZFP36L2, LFNG, HSH2D, LGALS1, COL5A1, BSG, ADGRB1, MYH9, JAK3, ZFPM1, DBN1, PLEC	110	1705	16792	1.70114	1	0.701976	0.701976
GOTERM_BP_ALL	GO:1902580~single-organism cellular localization	14	11.2	0.0261772	CDKN1A, ITGB2, PTTG1IP, PRKCZ, RPS15, TMEM201, PPP3CC, PALM, BSG, DVL1, MYH9, RPS11, JAK3, TNPO2	110	1102	16792	1.93935	1	0.701976	0.701976
GOTERM_BP_ALL	GO:0032269~negative regulation of cellular protein metabolic process	13	10.4	0.0272233	RTN4R, HEXIM1, CDKN1A, ADARB1, NOC2L, MEX3D, PRKCZ, ZFP36L2, TFAP4, DDIT4, AGO2, DVL1, ANAPC2	110	992	16792	2.00051	1	0.722655	0.722655
GOTERM_BP_ALL	GO:0051960~regulation of nervous system development	11	8.8	0.0277718	SEMA6B, RTN4R, LGALS1, METRN, CLCF1, PALM, DVL1, ADGRB1, PRKACA, DBN1, ANAPC2	110	769	16792	2.18362	1	0.729528	0.729528
GOTERM_BP_ALL	GO:0032984~macromolecular complex disassembly	6	4.8	0.0280472	MRPL4, DDIT4, DVL1, AURKAIP1, TRIOBP, PPP1CA	110	262	16792	3.49591	1	0.729528	0.729528
GOTERM_BP_ALL	GO:0043393~regulation of protein binding	5	4	0.0287578	LFNG, DVL1, PRKACA, ZFPM1, PPP1CA	110	178	16792	4.28805	1	0.729528	0.729528
GOTERM_BP_ALL	GO:0051348~negative regulation of transferase activity	7	5.6	0.028882	RTN4R, HEXIM1, CDKN1A, TFAP4, DVL1, ADARB1, ANAPC2	110	357	16792	2.99323	1	0.729528	0.729528
GOTERM_BP_ALL	GO:0042398~cellular modified amino acid biosynthetic process	3	2.4	0.0290437	GAMT, PTDSS2, SLC27A1	110	41	16792	11.1698	1	0.729528	0.729528
GOTERM_BP_ALL	GO:0050794~regulation of cellular process	79	63.2	0.0291478	ZNF512B, GPSM1, CDKN1A, SLC27A1, ANKLE1, ELL, ITGB2, ADARB1, NOC2L, TRIOBP, RAPGEFL1, LFNG, PPP3CC, LGALS1, FCGRT, GSG2, BSG, PALM, QSOX2, PRKACA, JAK3, JUNB, BAHCC1, SEMA6B, EGFL7, METRN, RFC2, RHBDF2, ATAD3A, IL17RA, ARHGAP45, HSH2D, DDIT4, ADGRB1, MYH9, ATP6V0D1, AURKAIP1, ZFPM1, RNF166, DBN1, GRID2IP, ANAPC2, LY6E, RTN4R, UHRF1, PTTG1IP, RASAL3, RASGRP2, PRKCZ, RASIP1, PRAM1, ZFP36L2, NCLN, R…	110	10489	16792	1.14975	1	0.729528	0.729528
GOTERM_BP_ALL	GO:0048675~axon extension	4	3.2	0.0317056	SEMA6B, RTN4R, DVL1, ANAPC2	110	106	16792	5.76055	1	0.771797	0.771797
GOTERM_BP_ALL	GO:0030330~DNA damage response, signal transduction by p53 class mediator	4	3.2	0.0317056	CDKN1A, TFAP4, ARID3A, PTTG1IP	110	106	16792	5.76055	1	0.771797	0.771797
GOTERM_BP_ALL	GO:0043470~regulation of carbohydrate catabolic process	3	2.4	0.0317177	INSR, DDIT4, PPP1CA	110	43	16792	10.6503	1	0.771797	0.771797
GOTERM_BP_ALL	GO:0002694~regulation of leukocyte activation	8	6.4	0.0327937	CDKN1A, LGALS1, CLCF1, RASAL3, JAK3, PRKCZ, ZFP36L2, PRAM1	110	468	16792	2.60948	1	0.774778	0.774778
GOTERM_BP_ALL	GO:0071156~regulation of cell cycle arrest	4	3.2	0.0332447	CDKN1A, TFAP4, ARID3A, PRKACA	110	108	16792	5.65387	1	0.774778	0.774778
GOTERM_BP_ALL	GO:0051247~positive regulation of protein metabolic process	17	13.6	0.0339447	CDKN1A, SLC27A1, UHRF1, INSR, PTTG1IP, PRKCZ, TFAP4, RXRA, CLCF1, DVL1, MYH9, LTBR, AURKAIP1, PRKACA, ZFPM1, RNF166, ANAPC2	110	1508	16792	1.72091	1	0.774778	0.774778
GOTERM_BP_ALL	GO:0007166~cell surface receptor signaling pathway	26	20.8	0.0340736	RTN4R, SLC27A1, ITGB2, PRKCZ, PRAM1, LFNG, FCGRT, BSG, DVL1, PRKACA, JAK3, SEMA6B, EGFL7, INSR, RHBDF2, MIB2, IL17RA, PPP1CA, CLCF1, DDIT4, AGO2, ADGRB1, MYH9, LTBR, ATP6V0D1, LY6E	110	2669	16792	1.48708	1	0.774778	0.774778
GOTERM_BP_ALL	GO:0048588~developmental cell growth	5	4	0.0341535	SEMA6B, RTN4R, DVL1, PRKCZ, ANAPC2	110	188	16792	4.05996	1	0.774778	0.774778
GOTERM_BP_ALL	GO:0051169~nuclear transport	8	6.4	0.0344385	RPS15, CDKN1A, ANKLE1, PTTG1IP, NOC2L, PRKACA, TNPO2, JAK3	110	473	16792	2.5819	1	0.774778	0.774778
GOTERM_BP_ALL	GO:2000107~negative regulation of leukocyte apoptotic process	3	2.4	0.0344848	HSH2D, NOC2L, JAK3	110	45	16792	10.177	1	0.774778	0.774778
GOTERM_BP_ALL	GO:0048856~anatomical structure development	46	36.8	0.0346525	GPSM1, RTN4R, CDKN1A, ELL, ITGB2, PRKCZ, TRIOBP, RASIP1, ZFP36L2, PCSK4, RAPGEFL1, LFNG, PPP3CC, RXRA, LGALS1, PALM, GNA12, BSG, DVL1, PRKACA, JAK3, JUNB, POLE, SEMA6B, GAMT, VASP, HEXIM1, EGFL7, METRN, INSR, PPP1CA, SLC7A5, FMNL1, COL5A1, CLCF1, DDIT4, AGO2, ADGRB1, ORAI1, MYH9, LTBR, PLCD3, ATP6V0D1, ZFPM1, DBN1, ANAPC2	110	5473	16792	1.28305	1	0.774778	0.774778
GOTERM_BP_ALL	GO:0006413~translational initiation	5	4	0.0347233	RPS15, RXRA, AGO2, RPS11, PPP1CA	110	189	16792	4.03848	1	0.774778	0.774778
GOTERM_BP_ALL	GO:0044767~single-organism developmental process	46	36.8	0.0348613	GPSM1, RTN4R, CDKN1A, ELL, ITGB2, PRKCZ, TRIOBP, RASIP1, ZFP36L2, PCSK4, RAPGEFL1, LFNG, PPP3CC, RXRA, LGALS1, PALM, GNA12, BSG, DVL1, PRKACA, JAK3, JUNB, POLE, SEMA6B, GAMT, VASP, HEXIM1, EGFL7, METRN, INSR, PPP1CA, SLC7A5, FMNL1, COL5A1, CLCF1, DDIT4, AGO2, ADGRB1, ORAI1, MYH9, LTBR, PLCD3, ATP6V0D1, ZFPM1, DBN1, ANAPC2	110	5475	16792	1.28258	1	0.774778	0.774778
GOTERM_BP_ALL	GO:0048646~anatomical structure formation involved in morphogenesis	14	11.2	0.0354976	VASP, EGFL7, ITGB2, RASIP1, LFNG, COL5A1, DVL1, ADGRB1, MYH9, PLCD3, ATP6V0D1, PRKACA, JUNB, ZFPM1	110	1151	16792	1.85679	1	0.774778	0.774778
GOTERM_BP_ALL	GO:0050804~modulation of synaptic transmission	6	4.8	0.0358204	DVL1, PRKACA, PRKCZ, DBN1, ANAPC2, GRID2IP	110	280	16792	3.27117	1	0.774778	0.774778
GOTERM_BP_ALL	GO:0035821~modification of morphology or physiology of other organism	4	3.2	0.0364379	GSDMD, RXRA, TFAP4, INSR	110	112	16792	5.45195	1	0.774778	0.774778
GOTERM_BP_ALL	GO:0030183~B cell differentiation	4	3.2	0.0364379	LFNG, LGALS1, CLCF1, JAK3	110	112	16792	5.45195	1	0.774778	0.774778
GOTERM_BP_ALL	GO:0009987~cellular process	107	85.6	0.036469	SLC27A1, ANKLE1, MUM1, ADARB1, NOC2L, RAPGEFL1, RPS15, LGALS1, FCGRT, BSG, PALM, RPS11, PRKACA, JUNB, BAHCC1, SEMA6B, GAMT, POLRMT, ATAD3B, ATAD3A, GTPBP3, ARHGAP45, DDIT4, ADGRB1, ORAI1, ATP6V0D1, AURKAIP1, ZFPM1, GRID2IP, ANAPC2, LY6E, RTN4R, TTYH1, PTTG1IP, RASAL3, RASGRP2, PRKCZ, ZFP36L2, PTDSS2, CHST12, DVL1, RHPN1, TNRC18, LONRF1, HEXIM1, GSDMD, VASP, TMEM120B, CDT1, INTS1, INSR, RMDN3, MEX…	110	15558	16792	1.04988	1	0.774778	0.774778
GOTERM_BP_ALL	GO:1902582~single-organism intracellular transport	10	8	0.0368747	RPS15, CDKN1A, TMEM201, PALM, BSG, PTTG1IP, RPS11, TNPO2, JAK3, PRKCZ	110	695	16792	2.19647	1	0.774778	0.774778
GOTERM_BP_ALL	GO:0042093~T-helper cell differentiation	3	2.4	0.0373423	JAK3, PRKCZ, ZFPM1	110	47	16792	9.74391	1	0.774778	0.774778
GOTERM_BP_ALL	GO:0040011~locomotion	17	13.6	0.0380326	SEMA6B, VASP, INSR, ITGB2, ADARB1, PRKCZ, IL17RA, SLC7A5, FMNL1, TMEM201, COL5A1, BSG, DDIT4, GNA12, DVL1, MYH9, JAK3	110	1530	16792	1.69616	1	0.774778	0.774778
GOTERM_BP_ALL	GO:0046631~alpha-beta T cell activation	4	3.2	0.0380917	RASAL3, JAK3, PRKCZ, ZFPM1	110	114	16792	5.3563	1	0.774778	0.774778
GOTERM_BP_ALL	GO:2000662~regulation of interleukin-5 secretion	2	1.6	0.0383261	PRKCZ, IL17RA	110	6	16792	50.8848	1	0.774778	0.774778
GOTERM_BP_ALL	GO:2000667~positive regulation of interleukin-13 secretion	2	1.6	0.0383261	PRKCZ, IL17RA	110	6	16792	50.8848	1	0.774778	0.774778
GOTERM_BP_ALL	GO:0072603~interleukin-5 secretion	2	1.6	0.0383261	PRKCZ, IL17RA	110	6	16792	50.8848	1	0.774778	0.774778
GOTERM_BP_ALL	GO:0051251~positive regulation of lymphocyte activation	6	4.8	0.0391696	CDKN1A, LGALS1, CLCF1, RASAL3, JAK3, PRKCZ	110	287	16792	3.19138	1	0.779442	0.779442
GOTERM_BP_ALL	GO:0044763~single-organism cellular process	89	71.2	0.0394059	GPSM1, CDKN1A, SLC27A1, ANKLE1, ITGB2, ADARB1, NOC2L, TRIOBP, PCSK4, RAPGEFL1, MRPL4, RPS15, LFNG, PPP3CC, LGALS1, FCGRT, GSG2, BSG, PALM, QSOX2, RPS11, PRKACA, JAK3, JUNB, POLE, BAHCC1, SEMA6B, GAMT, EGFL7, METRN, RFC2, RHBDF2, ATAD3B, ATAD3A, IL17RA, ARHGAP45, SLC7A5, HSH2D, DDIT4, ADGRB1, ORAI1, MYH9, ATP6V0D1, AURKAIP1, ZFPM1, DBN1, GRID2IP, ANAPC2, PLEC, LY6E, RTN4R, SLC43A2, TTYH1, UHRF1, P…	110	12256	16792	1.10854	1	0.779442	0.779442
GOTERM_BP_ALL	GO:0031175~neuron projection development	11	8.8	0.0395476	VASP, SEMA6B, RTN4R, LGALS1, METRN, PALM, DVL1, ADGRB1, PRKCZ, DBN1, ANAPC2	110	817	16792	2.05532	1	0.779442	0.779442
GOTERM_BP_ALL	GO:0072657~protein localization to membrane	8	6.4	0.0400699	RPS15, PPP3CC, PALM, ITGB2, BSG, DVL1, RPS11, PRKCZ	110	489	16792	2.49742	1	0.779442	0.779442
GOTERM_BP_ALL	GO:0002294~CD4-positive, alpha-beta T cell differentiation involved in immune response	3	2.4	0.0402873	JAK3, PRKCZ, ZFPM1	110	49	16792	9.3462	1	0.779442	0.779442
GOTERM_BP_ALL	GO:0006928~movement of cell or subcellular component	19	15.2	0.0404463	SEMA6B, VASP, INSR, ITGB2, ADARB1, TUBB4B, PRKCZ, IL17RA, SLC7A5, FMNL1, TMEM201, COL5A1, PALM, BSG, DDIT4, GNA12, DVL1, MYH9, JAK3	110	1795	16792	1.61584	1	0.779442	0.779442
GOTERM_BP_ALL	GO:0045595~regulation of cell differentiation	17	13.6	0.0408156	SEMA6B, RTN4R, METRN, PRKCZ, TRIOBP, ZFP36L2, LGALS1, COL5A1, CLCF1, PALM, DVL1, PRKACA, JAK3, JUNB, ZFPM1, DBN1, ANAPC2	110	1544	16792	1.68078	1	0.779442	0.779442
GOTERM_BP_ALL	GO:0032270~positive regulation of cellular protein metabolic process	16	12.8	0.0409296	CDKN1A, SLC27A1, UHRF1, INSR, PTTG1IP, PRKCZ, TFAP4, RXRA, CLCF1, DVL1, MYH9, LTBR, AURKAIP1, PRKACA, RNF166, ANAPC2	110	1420	16792	1.72005	1	0.779442	0.779442
GOTERM_BP_ALL	GO:0002293~alpha-beta T cell differentiation involved in immune response	3	2.4	0.0417919	JAK3, PRKCZ, ZFPM1	110	50	16792	9.15927	1	0.783414	0.783414
GOTERM_BP_ALL	GO:0002287~alpha-beta T cell activation involved in immune response	3	2.4	0.0417919	JAK3, PRKCZ, ZFPM1	110	50	16792	9.15927	1	0.783414	0.783414
GOTERM_BP_ALL	GO:0006955~immune response	17	13.6	0.0422615	GSDMD, ITGB2, ADARB1, TUBB4B, PRKCZ, PRAM1, LILRA5, LFNG, LGALS1, FCGRT, CLCF1, ORAI1, LTBR, PRKACA, JAK3, ZFPM1, LAIR1	110	1551	16792	1.6732	1	0.783414	0.783414
GOTERM_BP_ALL	GO:0042770~signal transduction in response to DNA damage	4	3.2	0.0423915	CDKN1A, TFAP4, ARID3A, PTTG1IP	110	119	16792	5.13125	1	0.783414	0.783414
GOTERM_BP_ALL	GO:0065009~regulation of molecular function	27	21.6	0.0428564	GPSM1, RTN4R, CDKN1A, SLC27A1, ELL, UHRF1, ITGB2, DENND3, ADARB1, RASAL3, RASGRP2, PRKCZ, RASIP1, RAPGEFL1, LFNG, PALM, DVL1, PRKACA, JAK3, HEXIM1, RFC2, INSR, ARHGAP45, PPP1CA, TFAP4, ZFPM1, ANAPC2	110	2863	16792	1.43963	1	0.783414	0.783414
GOTERM_BP_ALL	GO:0043933~macromolecular complex subunit organization	24	19.2	0.0429303	VASP, GSDMD, TMEM120B, UHRF1, INSR, MUM1, NOC2L, PRKCZ, TRIOBP, PPP1CA, RPS15, MRPL4, TFAP4, RXRA, COL5A1, GSG2, DDIT4, AGO2, DVL1, TNRC18, AURKAIP1, TNPO2, ZFPM1, BAHCC1	110	2461	16792	1.48871	1	0.783414	0.783414
GOTERM_BP_ALL	GO:0071375~cellular response to peptide hormone stimulus	6	4.8	0.0432249	GNG7, INSR, ATP6V0D1, PRKACA, JAK3, PRKCZ	110	295	16792	3.10484	1	0.783414	0.783414
GOTERM_BP_ALL	GO:0030217~T cell differentiation	5	4	0.0439363	LFNG, JAK3, PRKCZ, ZFPM1, ZFP36L2	110	204	16792	3.74153	1	0.790853	0.790853
GOTERM_BP_ALL	GO:0060560~developmental growth involved in morphogenesis	5	4	0.0445949	SEMA6B, RTN4R, DVL1, PRKCZ, ANAPC2	110	205	16792	3.72328	1	0.793184	0.793184
GOTERM_BP_ALL	GO:0050865~regulation of cell activation	8	6.4	0.0446694	CDKN1A, LGALS1, CLCF1, RASAL3, JAK3, PRKCZ, ZFP36L2, PRAM1	110	501	16792	2.4376	1	0.793184	0.793184
GOTERM_BP_ALL	GO:0000956~nuclear-transcribed mRNA catabolic process	5	4	0.0452591	RPS15, LSM7, AGO2, RPS11, ZFP36L2	110	206	16792	3.70521	1	0.793305	0.793305
GOTERM_BP_ALL	GO:0051338~regulation of transferase activity	12	9.6	0.0456927	RTN4R, HEXIM1, CDKN1A, SLC27A1, TFAP4, RFC2, INSR, DVL1, ADARB1, PRKACA, PRKCZ, ANAPC2	110	955	16792	1.91817	1	0.793305	0.793305
GOTERM_BP_ALL	GO:0031324~negative regulation of cellular metabolic process	23	18.4	0.045878	RTN4R, HEXIM1, CDKN1A, SLC27A1, ELL, UHRF1, ADARB1, NOC2L, MEX3D, PRKCZ, ZFP36L2, TFAP4, RXRA, PALM, DDIT4, AGO2, DVL1, TNRC18, JAK3, JUNB, ZFPM1, BAHCC1, ANAPC2	110	2345	16792	1.49725	1	0.793305	0.793305
GOTERM_BP_ALL	GO:0051098~regulation of binding	6	4.8	0.0458837	LFNG, TFAP4, DVL1, PRKACA, ZFPM1, PPP1CA	110	300	16792	3.05309	1	0.793305	0.793305
GOTERM_BP_ALL	GO:0045859~regulation of protein kinase activity	10	8	0.0478217	RTN4R, HEXIM1, CDKN1A, SLC27A1, TFAP4, INSR, DVL1, ADARB1, PRKACA, PRKCZ	110	730	16792	2.09116	1	0.818712	0.818712
GOTERM_BP_ALL	GO:0050790~regulation of catalytic activity	23	18.4	0.0481132	GPSM1, RTN4R, HEXIM1, CDKN1A, SLC27A1, ELL, UHRF1, RFC2, INSR, DENND3, ADARB1, RASGRP2, RASAL3, PRKCZ, RASIP1, RAPGEFL1, ARHGAP45, TFAP4, PALM, DVL1, PRKACA, JAK3, ANAPC2	110	2357	16792	1.48963	1	0.818712	0.818712
GOTERM_BP_ALL	GO:0051674~localization of cell	15	12	0.0488103	SEMA6B, INSR, ITGB2, ADARB1, PRKCZ, IL17RA, SLC7A5, FMNL1, TMEM201, COL5A1, BSG, DDIT4, GNA12, MYH9, JAK3	110	1330	16792	1.72167	1	0.818712	0.818712
GOTERM_BP_ALL	GO:0048870~cell motility	15	12	0.0488103	SEMA6B, INSR, ITGB2, ADARB1, PRKCZ, IL17RA, SLC7A5, FMNL1, TMEM201, COL5A1, BSG, DDIT4, GNA12, MYH9, JAK3	110	1330	16792	1.72167	1	0.818712	0.818712
GOTERM_BP_ALL	GO:0071385~cellular response to glucocorticoid stimulus	3	2.4	0.0496215	TFAP4, DDIT4, ZFP36L2	110	55	16792	8.32661	1	0.818712	0.818712
