# Supplementary material for: Evidence for additive and synergistic action of mammalian enhancers during cell fate determination
Source: eLife. 2021 Mar 26;10:e65381. doi: 10.7554/eLife.65381 (PMC8004103; doi:10.7554/eLife.65381)
Supplement: Supplementary file 3. [file elife-65381-supp3.xlsx]

## Sheet: SUPER.EK0
Category	Term	Count	%	PValue	Genes	List Total	Pop Hits	Pop Total	Fold Enrichment	Bonferroni	Benjamini	FDR
GOTERM_BP_ALL	GO:0002521~leukocyte differentiation	40	11.9403	2.48187e-15	SASH3, HDAC5, SPI1, CHD7, HMGB1, PRKCZ, ZFP36L2, LFNG, PREX1, LGALS1, UBASH3B, MYC, MYB, BLNK, ZBTB7B, JUNB, SLAMF1, JAG2, KLF10, CD74, SYK, POLM, LILRB2, FOS, CBFA2T3, TGFBR2, KIAA0922, BCL6, ID2, IRF1, BCL2, RARA, FAM20C, MYH9, PTPN6, TCF3, LTBR, TRIB1, IL7R, ADA	306	474	16792	4.63087	1.19169e-11	1.2109e-11	1.11138e-11
GOTERM_BP_ALL	GO:0048522~positive regulation of cellular process	149	44.4776	3.26908e-14	SCARB1, SLC27A1, SPI1, ANKLE1, SMC6, ADARB1, HNMT, ETS1, PHB2, ETS2, IGF1R, ELK3, PREX1, CCND3, LGALS1, TRIM28, FGF9, MYC, MYB, PIM1, SYNPO, JUNB, ARRDC4, DAPK1, EBF1, HLA-E, BCR, MSH6, BIN1, STIM2, TBL1XR1, DDIT4, S100A6, MZF1, AURKAIP1, TRIB1, TRIB2, ANAPC2, BLK, RNASEH2B, AKNA, INSIG1, STK39, SLC1A3, DCUN1D2, RASAL3, PRKCZ, IQGAP3, ZFP36L2, IRAK2, DVL1, BMF, HIVEP3, ZNF423, BCL9L, SLAMF1, HEXI…	306	4744	16792	1.72354	1.59253e-10	5.02315e-11	4.6103e-11
GOTERM_BP_ALL	GO:0002520~immune system development	51	15.2239	3.79415e-14	DYRK3, SPI1, CHD7, HMGB1, ETS1, LFNG, PREX1, LGALS1, UBASH3B, MYC, MYB, BLNK, JUNB, KLF10, KLF13, SYK, GLRX5, TTC7A, FOS, CBFA2T3, TGFBR2, MSH6, KIAA0922, IRF1, RARA, FAM20C, MYH9, IRF8, TRIB1, SASH3, HDAC5, PHLPP1, LRP5, PRKCZ, ZFP36L2, ZBTB7B, SH2B3, SLAMF1, JAG2, CD74, POLM, LILRB2, ACVR2A, BCL6, ID2, BCL2, PTPN6, TCF3, LTBR, IL7R, ADA	306	821	16792	3.40885	1.85254e-10	5.02315e-11	4.6103e-11
GOTERM_BP_ALL	GO:0030097~hemopoiesis	48	14.3284	5.00695e-14	SASH3, HDAC5, DYRK3, SPI1, CHD7, HMGB1, ETS1, PRKCZ, ZFP36L2, LFNG, PREX1, LGALS1, UBASH3B, MYC, MYB, BLNK, ZBTB7B, JUNB, SH2B3, SLAMF1, JAG2, KLF10, CD74, KLF13, SYK, POLM, GLRX5, TTC7A, LILRB2, FOS, CBFA2T3, ACVR2A, TGFBR2, KIAA0922, BCL6, ID2, IRF1, BCL2, RARA, IRF8, FAM20C, MYH9, PTPN6, TCF3, LTBR, TRIB1, IL7R, ADA	306	739	16792	3.56433	2.44297e-10	5.02315e-11	4.6103e-11
GOTERM_BP_ALL	GO:0002376~immune system process	97	28.9552	5.14772e-14	SPI1, LST1, ICAM2, ADARB1, ETS1, PHB2, IGF1R, PREX1, VPREB1, CCND3, LGALS1, TRIM28, UBASH3B, FCGRT, MYC, MYB, JUNB, DAPK1, TTC7A, HLA-E, BCR, MSH6, KIAA0922, DDIT4, TRIB1, BLK, RASAL3, PRKCZ, ZFP36L2, IRAK2, ZBTB7B, SLAMF1, JAG2, GSDMD, BCL6, ID2, BCL2, TCF3, IL7R, ADA, CD22, DYRK3, CHD7, ITGB2, LRMP, HMGB1, LFNG, DUSP10, BLNK, MYO18A, FLOT1, CCR5, KLF10, KLF13, SYK, GLRX5, TUBB, TFEB, FOS, CBFA2…	306	2465	16792	2.15941	2.51339e-10	5.02315e-11	4.6103e-11
GOTERM_BP_ALL	GO:0045321~leukocyte activation	48	14.3284	7.44326e-14	SASH3, CX3CR1, HDAC5, SPI1, LST1, CHD7, ITGB2, HMGB1, RASAL3, PRKCZ, ZFP36L2, LFNG, PREX1, CCND3, LGALS1, CNR2, MYB, BLNK, MYO18A, ZBTB7B, SLAMF1, JAG2, CD74, SYK, POLM, LILRB2, TGFBR2, HLA-E, MSH6, BCR, APBB1IP, IGLL5, HSH2D, KIAA0922, BCL6, ID2, IRF1, IL1B, BCL2, RARA, MYH9, CD48, PTPN6, TLR7, TCF3, LTBR, IL7R, ADA	306	747	16792	3.52616	3.62924e-10	5.65465e-11	5.1899e-11
GOTERM_BP_ALL	GO:0048534~hematopoietic or lymphoid organ development	49	14.6269	8.11284e-14	DYRK3, SPI1, CHD7, HMGB1, ETS1, LFNG, PREX1, LGALS1, UBASH3B, MYC, MYB, BLNK, JUNB, KLF10, KLF13, SYK, GLRX5, TTC7A, FOS, CBFA2T3, TGFBR2, KIAA0922, IRF1, RARA, FAM20C, MYH9, IRF8, TRIB1, SASH3, HDAC5, LRP5, PRKCZ, ZFP36L2, ZBTB7B, SH2B3, SLAMF1, JAG2, CD74, POLM, LILRB2, ACVR2A, BCL6, ID2, BCL2, PTPN6, TCF3, LTBR, IL7R, ADA	306	778	16792	3.45619	3.95966e-10	5.65465e-11	5.1899e-11
GOTERM_BP_ALL	GO:0030098~lymphocyte differentiation	30	8.95522	4.74302e-13	SASH3, HDAC5, SPI1, CHD7, HMGB1, PRKCZ, ZFP36L2, LFNG, PREX1, LGALS1, MYB, BLNK, ZBTB7B, SLAMF1, JAG2, CD74, SYK, POLM, LILRB2, TGFBR2, KIAA0922, BCL6, ID2, IRF1, BCL2, RARA, PTPN6, TCF3, IL7R, ADA	306	310	16792	5.31056	2.31405e-09	2.89265e-10	2.6549e-10
GOTERM_BP_ALL	GO:0007275~multicellular organism development	148	44.1791	8.71559e-13	SPI1, LST1, NAB2, ATN1, STMN3, LDLRAD4, HNMT, ETS1, PHB2, ETS2, ELK3, PREX1, TCL1A, LGALS1, TRIM28, FGF9, UBASH3B, MYC, SCMH1, MYB, PIM1, CHAC1, JUNB, EPHB4, EBF1, TTC7A, BCR, MSH6, KIAA0922, BIN1, KIF16B, TBL1XR1, DDIT4, TBC1D24, S100A6, ATP6V0D1, TRIB1, ANAPC2, RTN4R, RNASEH2B, INSIG1, SLC1A3, AEBP1, PRKCZ, IQGAP3, ZFP36L2, DVL1, HIVEP3, HIVEP2, ZNF423, ZBTB7B, BCL9L, SLAMF1, HEXIM1, JAG2, VASP…	306	4877	16792	1.66529	4.25217e-09	4.72482e-10	4.33649e-10
GOTERM_BP_ALL	GO:0048518~positive regulation of biological process	156	46.5672	1.1281e-12	SCARB1, SLC27A1, SPI1, ANKLE1, ICAM2, SMC6, ADARB1, HNMT, ETS1, PHB2, ETS2, IGF1R, ELK3, PREX1, CCND3, LGALS1, TRIM28, FGF9, MYC, MYB, PIM1, SYNPO, JUNB, ARRDC4, DAPK1, EBF1, HLA-E, BCR, MSH6, BIN1, STIM2, TBL1XR1, DDIT4, S100A6, MZF1, AURKAIP1, TRIB1, TRIB2, ABCG1, ANAPC2, BLK, RNASEH2B, AKNA, INSIG1, STK39, SLC1A3, DCUN1D2, RASAL3, PRKCZ, IQGAP3, ZFP36L2, IRAK2, DVL1, BMF, HIVEP3, ZNF423, ZBTB7…	306	5285	16792	1.6198	5.50399e-09	5.3011e-10	4.86541e-10
GOTERM_BP_ALL	GO:0045595~regulation of cell differentiation	70	20.8955	1.19517e-12	SPI1, CHD7, HMGB1, LDLRAD4, ETS1, TRIOBP, PREX1, DUSP10, LGALS1, FGF9, UBASH3B, MYC, MYB, FLOT1, TSPO, JUNB, KLF10, ZHX2, KLF13, SYK, FOS, TGFBR2, TNFRSF1A, KIAA0922, BIN1, IRF1, IL1B, RARA, FAM20C, TRIB1, TRIB2, ABCG1, DBN1, ANAPC2, SASH3, RTN4R, CX3CR1, HDAC5, LRP1, INSIG1, LRP5, ASAP1, PRKCZ, ZFP36L2, DVL1, ZBTB7B, BCL9L, TCFL5, RBM38, CD74, FZD3, BCL11A, SEMA4B, SEMA4C, LILRB2, ACVR2A, SMAD7,…	306	1544	16792	2.48789	5.83116e-09	5.3011e-10	4.86541e-10
GOTERM_BP_ALL	GO:0046649~lymphocyte activation	42	12.5373	2.27693e-12	SASH3, HDAC5, SPI1, LST1, CHD7, ITGB2, HMGB1, RASAL3, PRKCZ, ZFP36L2, LFNG, PREX1, CCND3, LGALS1, MYB, BLNK, ZBTB7B, SLAMF1, JAG2, CD74, SYK, POLM, LILRB2, TGFBR2, HLA-E, MSH6, APBB1IP, IGLL5, HSH2D, KIAA0922, BCL6, ID2, IRF1, IL1B, BCL2, RARA, MYH9, CD48, PTPN6, TCF3, IL7R, ADA	306	643	16792	3.58442	1.11093e-08	9.25761e-10	8.49674e-10
GOTERM_BP_ALL	GO:0030154~cell differentiation	120	35.8209	4.28686e-12	SPI1, LST1, NAB2, STMN3, MSI2, LDLRAD4, ETS1, ETS2, ELK3, PREX1, LGALS1, TRIM28, FGF9, UBASH3B, MYC, MYB, CHAC1, RPS11, JUNB, KIAA0922, BIN1, TBL1XR1, DDIT4, TBC1D24, S100A6, TRIB1, TRIB2, ABCG1, ANAPC2, RTN4R, BLK, INSIG1, SLC1A3, PRKCZ, ZFP36L2, DVL1, HIVEP3, ZNF423, ZBTB7B, BCL9L, SLAMF1, JAG2, VASP, TMEM120B, FZD3, BCL11A, TDRD9, HPS4, FOSL2, SMAD7, LRFN2, COL5A1, BCL6, ID2, MAFF, BCL2, MDM2,…	306	3652	16792	1.80315	2.09158e-08	1.60889e-09	1.47666e-09
GOTERM_BP_ALL	GO:0044767~single-organism developmental process	158	47.1642	4.98404e-12	SPI1, LST1, NAB2, ATN1, STMN3, SMC6, MSI2, LDLRAD4, HNMT, ETS1, PHB2, ETS2, ELK3, PREX1, TCL1A, LGALS1, TRIM28, FGF9, UBASH3B, MYC, SCMH1, MYB, PIM1, CHAC1, JUNB, EPHB4, EBF1, TTC7A, BCR, MSH6, KIAA0922, BIN1, KIF16B, TBL1XR1, DDIT4, TBC1D24, S100A6, ATP6V0D1, TRIB1, ANAPC2, RTN4R, RNASEH2B, INSIG1, SLC1A3, AEBP1, PRKCZ, IQGAP3, ZFP36L2, DVL1, HIVEP3, HIVEP2, ZNF423, ZBTB7B, BCL9L, SLAMF1, HEXIM1…	306	5475	16792	1.58363	2.4317e-08	1.73694e-09	1.59418e-09
GOTERM_BP_ALL	GO:0001775~cell activation	49	14.6269	2.32672e-11	SPI1, LST1, CHD7, ITGB2, HMGB1, LFNG, PREX1, CCND3, LGALS1, UBASH3B, MYB, BLNK, MYO18A, SYK, TGFBR2, HLA-E, MSH6, BCR, APBB1IP, HSH2D, KIAA0922, IRF1, IL1B, RARA, MYH9, CD48, TLR7, SASH3, CX3CR1, HDAC5, RASAL3, PRKCZ, ZFP36L2, CNR2, ZBTB7B, SLAMF1, JAG2, CD74, POLM, LILRB2, IGLL5, BCL6, ID2, BCL2, PTPN6, TCF3, LTBR, IL7R, ADA	306	910	16792	2.95485	1.1352e-07	7.56803e-09	6.94602e-09
GOTERM_BP_ALL	GO:0048869~cellular developmental process	125	37.3134	3.27123e-11	SPI1, LST1, NAB2, STMN3, SMC6, MSI2, LDLRAD4, ETS1, ETS2, ELK3, PREX1, LGALS1, TRIM28, FGF9, UBASH3B, MYC, MYB, CHAC1, RPS11, JUNB, KIAA0922, BIN1, TBL1XR1, DDIT4, TBC1D24, S100A6, ATP6V0D1, TRIB1, TRIB2, ABCG1, ANAPC2, RTN4R, BLK, INSIG1, SLC1A3, PRKCZ, ZFP36L2, DVL1, HIVEP3, ZNF423, ZBTB7B, BCL9L, SLAMF1, JAG2, VASP, TMEM120B, FZD3, BCL11A, TDRD9, HMGA1, HPS4, FOSL2, SMAD7, LRFN2, COL5A1, BCL6,…	306	3992	16792	1.71831	1.59603e-07	9.97521e-09	9.15536e-09
GOTERM_BP_ALL	GO:0048583~regulation of response to stimulus	117	34.9254	4.02412e-11	ANKLE1, ICAM2, STMN3, LDLRAD4, ETS1, PHB2, IGF1R, PREX1, LGALS1, TRIM28, FGF9, UBASH3B, FCGRT, MYC, MYB, CHAC1, DAPK1, HLA-E, ARHGAP45, BCR, MSH6, KIAA0922, DDIT4, TRIB1, TRIB2, RTN4R, BLK, RNASEH2B, STK39, RASAL3, PRKCZ, IQGAP3, IRAK2, DVL1, BMF, ZNF423, BCL9L, SLAMF1, HEXIM1, JAG2, INSR, HMGA1, ARHGAP25, SMAD7, PTPRE, BCL6, BCL2, MDM2, SNAI1, GTF2IRD1, IL7R, ADA, GPSM1, DENND1A, ITGB2, HMGB1, H…	306	3636	16792	1.76581	1.96337e-07	1.15492e-08	1.06e-08
GOTERM_BP_ALL	GO:0032502~developmental process	158	47.1642	5.81022e-11	SPI1, LST1, NAB2, ATN1, STMN3, SMC6, MSI2, LDLRAD4, HNMT, ETS1, PHB2, ETS2, ELK3, PREX1, TCL1A, LGALS1, TRIM28, FGF9, UBASH3B, MYC, SCMH1, MYB, PIM1, CHAC1, JUNB, EPHB4, EBF1, TTC7A, BCR, MSH6, KIAA0922, BIN1, KIF16B, TBL1XR1, DDIT4, TBC1D24, S100A6, ATP6V0D1, TRIB1, ANAPC2, RTN4R, RNASEH2B, INSIG1, SLC1A3, AEBP1, PRKCZ, IQGAP3, ZFP36L2, DVL1, HIVEP3, HIVEP2, ZNF423, ZBTB7B, BCL9L, SLAMF1, HEXIM1…	306	5632	16792	1.53948	2.83481e-07	1.57282e-08	1.44355e-08
GOTERM_BP_ALL	GO:1903706~regulation of hemopoiesis	28	8.35821	6.12493e-11	SASH3, SPI1, HMGB1, ETS1, PRKCZ, ZFP36L2, LGALS1, UBASH3B, MYC, MYB, ZBTB7B, KLF10, CD74, KLF13, SYK, LILRB2, FOS, ACVR2A, TGFBR2, KIAA0922, BCL6, ID2, IRF1, RARA, PTPN6, TRIB1, IL7R, ADA	306	328	16792	4.68452	2.98835e-07	1.57282e-08	1.44355e-08
GOTERM_BP_ALL	GO:0050793~regulation of developmental process	81	24.1791	8.99624e-11	SPI1, LST1, NAB2, CHD7, ITGB2, HMGB1, LDLRAD4, SYNE3, ETS1, PHB2, TRIOBP, LFNG, PREX1, DUSP10, LGALS1, FGF9, UBASH3B, MYC, MYB, FLOT1, TSPO, KLF10, ZHX2, KLF13, SYK, FOS, TGFBR2, TNFRSF1A, MSH6, BCR, KIAA0922, BIN1, IRF1, IL1B, RARA, TBC1D24, FAM20C, MYH9, TRIB1, DBN1, ANAPC2, SASH3, RTN4R, CX3CR1, HDAC5, PHLPP1, LRP1, ASAP1, PRKCZ, IQGAP3, ZFP36L2, RXRA, DVL1, ZBTB7B, BCL9L, RBM38, CD74, FZD3, B…	306	2129	16792	2.08781	4.38926e-07	2.19463e-08	2.01426e-08
GOTERM_BP_ALL	GO:0007159~leukocyte cell-cell adhesion	34	10.1493	9.72911e-11	SASH3, CHD7, ITGB2, HMGB1, RASAL3, ETS1, PRKCZ, ZFP36L2, LFNG, PREX1, CCND3, LGALS1, MYB, ZBTB7B, SLAMF1, JAG2, CD74, SYK, LILRB2, TGFBR2, HLA-E, APBB1IP, HSH2D, KIAA0922, BCL6, IRF1, IL1B, BCL2, RARA, MYH9, CD48, PTPN6, IL7R, ADA	306	491	16792	3.79995	4.74683e-07	2.2604e-08	2.07462e-08
GOTERM_BP_ALL	GO:0048856~anatomical structure development	154	45.9701	1.1173e-10	SPI1, LST1, NAB2, ATN1, STMN3, MSI2, LDLRAD4, HNMT, ETS1, PHB2, ETS2, ELK3, PREX1, TCL1A, LGALS1, TRIM28, FGF9, UBASH3B, MYC, SCMH1, MYB, PIM1, CHAC1, JUNB, EPHB4, EBF1, TTC7A, BCR, MSH6, KIAA0922, BIN1, KIF16B, TBL1XR1, DDIT4, TBC1D24, S100A6, ATP6V0D1, TRIB1, ANAPC2, RTN4R, RNASEH2B, INSIG1, SLC1A3, AEBP1, PRKCZ, IQGAP3, ZFP36L2, DVL1, HIVEP3, HIVEP2, ZNF423, ZBTB7B, BCL9L, SLAMF1, HEXIM1, JAG2…	306	5473	16792	1.5441	5.4513e-07	2.47782e-08	2.27417e-08
GOTERM_BP_ALL	GO:1902105~regulation of leukocyte differentiation	24	7.16418	1.16806e-10	SASH3, KLF10, CD74, SYK, HMGB1, LILRB2, FOS, PRKCZ, ZFP36L2, TGFBR2, KIAA0922, LGALS1, BCL6, UBASH3B, MYC, ID2, IRF1, MYB, RARA, PTPN6, ZBTB7B, TRIB1, IL7R, ADA	306	244	16792	5.39762	5.69898e-07	2.47782e-08	2.27417e-08
GOTERM_BP_ALL	GO:0044707~single-multicellular organism process	163	48.6567	1.32236e-10	SCARB1, SLC27A1, SPI1, LST1, NAB2, ATN1, STMN3, LDLRAD4, HNMT, ETS1, PHB2, ETS2, ELK3, PREX1, TCL1A, LGALS1, TRIM28, FGF9, UBASH3B, MYC, SCMH1, MYB, PIM1, CHAC1, RPS11, JUNB, EPHB4, EBF1, TTC7A, CACNA2D4, HLA-E, BCR, MSH6, KIAA0922, BIN1, KIF16B, TBL1XR1, DDIT4, TBC1D24, S100A6, ATP6V0D1, TRIB1, TRIB2, ABCG1, ANAPC2, RTN4R, RNASEH2B, INSIG1, STK39, SLC1A3, AEBP1, PRKCZ, IQGAP3, ZFP36L2, DVL1, HIV…	306	5943	16792	1.50509	6.45179e-07	2.68825e-08	2.4673e-08
GOTERM_BP_ALL	GO:0042110~T cell activation	32	9.55224	1.62919e-10	SASH3, CHD7, HMGB1, RASAL3, PRKCZ, ZFP36L2, LFNG, PREX1, CCND3, LGALS1, MYB, ZBTB7B, SLAMF1, JAG2, CD74, SYK, LILRB2, TGFBR2, HLA-E, APBB1IP, HSH2D, KIAA0922, BCL6, IRF1, IL1B, BCL2, RARA, MYH9, CD48, PTPN6, IL7R, ADA	306	446	16792	3.93728	7.94882e-07	2.99227e-08	2.74634e-08
GOTERM_BP_ALL	GO:0070489~T cell aggregation	32	9.55224	1.62919e-10	SASH3, CHD7, HMGB1, RASAL3, PRKCZ, ZFP36L2, LFNG, PREX1, CCND3, LGALS1, MYB, ZBTB7B, SLAMF1, JAG2, CD74, SYK, LILRB2, TGFBR2, HLA-E, APBB1IP, HSH2D, KIAA0922, BCL6, IRF1, IL1B, BCL2, RARA, MYH9, CD48, PTPN6, IL7R, ADA	306	446	16792	3.93728	7.94882e-07	2.99227e-08	2.74634e-08
GOTERM_BP_ALL	GO:2000026~regulation of multicellular organismal development	70	20.8955	1.6559e-10	SPI1, CHD7, ITGB2, HMGB1, LDLRAD4, ETS1, PHB2, LFNG, PREX1, DUSP10, LGALS1, FGF9, UBASH3B, MYC, MYB, FLOT1, TSPO, KLF10, ZHX2, KLF13, SYK, FOS, TGFBR2, TNFRSF1A, MSH6, KIAA0922, BIN1, IRF1, IL1B, RARA, FAM20C, TRIB1, DBN1, ANAPC2, SASH3, RTN4R, CX3CR1, HDAC5, PHLPP1, LRP1, ASAP1, PRKCZ, IQGAP3, ZFP36L2, RXRA, DVL1, ZBTB7B, BCL9L, CD74, FZD3, BCL11A, SEMA4B, INSR, SEMA4C, LILRB2, ACVR2A, SMAD7, CO…	306	1721	16792	2.23202	8.07913e-07	2.99227e-08	2.74634e-08
GOTERM_BP_ALL	GO:0071593~lymphocyte aggregation	32	9.55224	1.72002e-10	SASH3, CHD7, HMGB1, RASAL3, PRKCZ, ZFP36L2, LFNG, PREX1, CCND3, LGALS1, MYB, ZBTB7B, SLAMF1, JAG2, CD74, SYK, LILRB2, TGFBR2, HLA-E, APBB1IP, HSH2D, KIAA0922, BCL6, IRF1, IL1B, BCL2, RARA, MYH9, CD48, PTPN6, IL7R, ADA	306	447	16792	3.92847	8.39198e-07	2.99714e-08	2.7508e-08
GOTERM_BP_ALL	GO:0048519~negative regulation of biological process	136	40.597	2.0269e-10	SLC27A1, SPI1, LST1, NAB2, ATN1, STMN3, ADARB1, LDLRAD4, ETS1, PHB2, ETS2, IGF1R, ELK3, LGALS1, TRIM28, FGF9, UBASH3B, MYC, SCMH1, MYB, PIM1, CHAC1, JUNB, BAHCC1, DAPK1, USP3, HLA-E, BCR, MSH6, KIAA0922, TBL1XR1, DDIT4, MZF1, AURKAIP1, TRIB1, TRIB2, ABCG1, ANAPC2, RTN4R, BLK, PIF1, RNASEH2B, PXK, INSIG1, STK39, AEBP1, RASAL3, PRKCZ, IQGAP3, ZFP36L2, IRAK2, DVL1, ZNF423, BCL9L, SLAMF1, HEXIM1, FZD…	306	4623	16792	1.61434	9.88922e-07	3.41008e-08	3.12981e-08
GOTERM_BP_ALL	GO:0048731~system development	129	38.5075	2.14209e-10	SPI1, LST1, NAB2, ATN1, STMN3, LDLRAD4, HNMT, ETS1, PHB2, ETS2, ELK3, PREX1, LGALS1, TRIM28, FGF9, UBASH3B, MYC, MYB, CHAC1, JUNB, EPHB4, TTC7A, BCR, MSH6, KIAA0922, BIN1, TBL1XR1, DDIT4, TBC1D24, S100A6, ATP6V0D1, TRIB1, ANAPC2, RTN4R, INSIG1, SLC1A3, AEBP1, PRKCZ, IQGAP3, ZFP36L2, DVL1, HIVEP3, ZNF423, ZBTB7B, BCL9L, SLAMF1, HEXIM1, JAG2, VASP, FZD3, BCL11A, INSR, FOSL2, SMAD7, LRFN2, COL5A1, B…	306	4291	16792	1.64973	1.04512e-06	3.48375e-08	3.19742e-08
GOTERM_BP_ALL	GO:0010646~regulation of cell communication	101	30.1493	2.49469e-10	STMN3, LDLRAD4, PHB2, IGF1R, PREX1, LGALS1, FGF9, UBASH3B, MYC, CHAC1, DAPK1, ARHGAP45, BCR, KIAA0922, DDIT4, TRIB1, TRIB2, ANAPC2, RTN4R, BLK, PXK, SLC1A3, RASAL3, PRKCZ, IQGAP3, IRAK2, DVL1, BMF, ZNF423, BCL9L, SLAMF1, HEXIM1, JAG2, INSR, ARHGAP25, SMAD7, PTPRE, BCL6, BCL2, MDM2, SNAI1, ADA, GPSM1, DENND1A, CHD7, HMGB1, HERPUD1, LFNG, PPP3CC, DUSP10, PSD4, BLNK, UBTF, SPIN1, FLOT1, PMEPA1, EGFL…	306	3020	16792	1.83525	1.21716e-06	3.85281e-08	3.53615e-08
GOTERM_BP_ALL	GO:0070486~leukocyte aggregation	32	9.55224	2.52695e-10	SASH3, CHD7, HMGB1, RASAL3, PRKCZ, ZFP36L2, LFNG, PREX1, CCND3, LGALS1, MYB, ZBTB7B, SLAMF1, JAG2, CD74, SYK, LILRB2, TGFBR2, HLA-E, APBB1IP, HSH2D, KIAA0922, BCL6, IRF1, IL1B, BCL2, RARA, MYH9, CD48, PTPN6, IL7R, ADA	306	454	16792	3.8679	1.2329e-06	3.85281e-08	3.53615e-08
GOTERM_BP_ALL	GO:0023051~regulation of signaling	102	30.4478	2.79807e-10	STMN3, LDLRAD4, PHB2, IGF1R, PREX1, LGALS1, FGF9, UBASH3B, MYC, CHAC1, DAPK1, ARHGAP45, BCR, KIAA0922, KIF16B, DDIT4, TRIB1, TRIB2, ANAPC2, RTN4R, BLK, PXK, SLC1A3, RASAL3, PRKCZ, IQGAP3, IRAK2, DVL1, BMF, ZNF423, BCL9L, SLAMF1, HEXIM1, JAG2, INSR, ARHGAP25, SMAD7, PTPRE, BCL6, BCL2, MDM2, SNAI1, ADA, GPSM1, DENND1A, CHD7, HMGB1, HERPUD1, LFNG, PPP3CC, DUSP10, PSD4, BLNK, UBTF, SPIN1, FLOT1, PMEP…	306	3070	16792	1.82324	1.36518e-06	4.13691e-08	3.7969e-08
GOTERM_BP_ALL	GO:0045619~regulation of lymphocyte differentiation	18	5.37313	6.80603e-10	SASH3, CD74, SYK, HMGB1, LILRB2, PRKCZ, ZFP36L2, TGFBR2, KIAA0922, BCL6, ID2, IRF1, MYB, RARA, PTPN6, ZBTB7B, IL7R, ADA	306	140	16792	7.05546	3.32066e-06	9.76665e-08	8.96394e-08
GOTERM_BP_ALL	GO:0030217~T cell differentiation	21	6.26866	9.89052e-10	JAG2, SASH3, CD74, SYK, CHD7, HMGB1, LILRB2, PRKCZ, ZFP36L2, TGFBR2, LFNG, PREX1, KIAA0922, BCL6, IRF1, MYB, BCL2, RARA, ZBTB7B, IL7R, ADA	306	204	16792	5.64898	4.82557e-06	1.37874e-07	1.26542e-07
GOTERM_BP_ALL	GO:0009966~regulation of signal transduction	92	27.4627	1.65413e-09	GPSM1, DENND1A, STMN3, HMGB1, LDLRAD4, PHB2, IGF1R, HERPUD1, LFNG, PREX1, PPP3CC, DUSP10, LGALS1, FGF9, UBASH3B, MYC, PSD4, UBTF, SPIN1, BLNK, FLOT1, PMEPA1, CHAC1, EGFL7, SYK, DUSP1, DAPK1, RFC2, RHBDF2, GAB1, TRAF1, PPP2R5C, TGFBR2, TNFRSF1A, ARHGAP45, BCR, HSH2D, KIAA0922, IRF1, IL1B, DDIT4, PXDN, FAM20C, TLR7, TRIB1, TRIB2, RTN4R, CX3CR1, PHLPP1, LRP1, NXN, NLRC5, LRP5, RASAL3, PRKCZ, IQGAP3,…	306	2728	16792	1.85065	8.07046e-06	2.2418e-07	2.05755e-07
GOTERM_BP_ALL	GO:0002694~regulation of leukocyte activation	31	9.25373	2.22686e-09	SASH3, LST1, HMGB1, RASAL3, PRKCZ, ZFP36L2, LGALS1, CNR2, MYB, MYO18A, ZBTB7B, SLAMF1, CD74, SYK, LILRB2, TGFBR2, HLA-E, MSH6, BCR, IGLL5, KIAA0922, BCL6, ID2, IRF1, IL1B, BCL2, RARA, PTPN6, TCF3, IL7R, ADA	306	468	16792	3.63494	1.08648e-05	2.93644e-07	2.6951e-07
GOTERM_BP_ALL	GO:0050865~regulation of cell activation	32	9.55224	2.77062e-09	SASH3, LST1, HMGB1, RASAL3, PRKCZ, ZFP36L2, LGALS1, UBASH3B, CNR2, MYB, MYO18A, ZBTB7B, SLAMF1, CD74, SYK, LILRB2, TGFBR2, HLA-E, MSH6, BCR, IGLL5, KIAA0922, BCL6, ID2, IRF1, IL1B, BCL2, RARA, PTPN6, TCF3, IL7R, ADA	306	501	16792	3.50504	1.35178e-05	3.55733e-07	3.26496e-07
GOTERM_BP_ALL	GO:0050794~regulation of cellular process	239	71.3433	2.9358e-09	SPI1, ANKLE1, LST1, ICAM2, STMN3, ADARB1, LDLRAD4, SMC6, PHB2, ELK3, PREX1, LGALS1, TRIM28, UBASH3B, MYC, MYB, CHAC1, SYNPO, JUNB, EPHB4, TNS1, ARRDC4, DAPK1, EBF1, CACNA2D4, HLA-E, BCR, KIAA0922, BIN1, DDIT4, AURKAIP1, ATP6V0D1, TRIB1, TRIB2, PIF1, DCUN1D2, IQGAP3, PRKCZ, HIVEP3, HIVEP2, ZBTB7B, ATP6V1C1, SLAMF1, JAG2, VASP, HEXIM1, GSDMD, CDT1, FZD3, BCL11A, INSR, INTS3, FOSL2, LPAR5, ID2, AGO2…	306	10489	16792	1.25039	1.43237e-05	3.67277e-07	3.3709e-07
GOTERM_BP_ALL	GO:0016337~single organismal cell-cell adhesion	39	11.6418	4.23336e-09	SASH3, TTYH1, CHD7, ITGB2, ICAM2, HMGB1, RASAL3, ETS1, PRKCZ, ZFP36L2, LFNG, PREX1, CCND3, LGALS1, UBASH3B, MYB, FLOT1, ZBTB7B, SLAMF1, JAG2, CD74, SYK, LILRB2, TGFBR2, SMAD7, HLA-E, APBB1IP, HSH2D, KIAA0922, BCL6, IRF1, IL1B, BCL2, RARA, MYH9, CD48, PTPN6, IL7R, ADA	306	725	16792	2.95194	2.06544e-05	5.16364e-07	4.73925e-07
GOTERM_BP_ALL	GO:0048523~negative regulation of cellular process	125	37.3134	4.85811e-09	SLC27A1, SPI1, LST1, NAB2, ATN1, STMN3, ADARB1, LDLRAD4, ETS1, PHB2, ETS2, IGF1R, ELK3, LGALS1, TRIM28, FGF9, UBASH3B, MYC, SCMH1, MYB, PIM1, CHAC1, JUNB, BAHCC1, DAPK1, USP3, BCR, MSH6, KIAA0922, TBL1XR1, DDIT4, MZF1, AURKAIP1, TRIB1, TRIB2, ABCG1, ANAPC2, RTN4R, BLK, PIF1, INSIG1, STK39, AEBP1, RASAL3, PRKCZ, ZFP36L2, DVL1, ZNF423, BCL9L, SLAMF1, HEXIM1, FZD3, BCL11A, INTS3, HMGA1, TBCD, SMAD7,…	306	4300	16792	1.59523	2.37024e-05	5.78115e-07	5.306e-07
GOTERM_BP_ALL	GO:0051239~regulation of multicellular organismal process	89	26.5672	5.16418e-09	SCARB1, SLC27A1, SPI1, CHD7, ITGB2, HMGB1, LDLRAD4, ETS1, PHB2, LFNG, PREX1, DUSP10, LGALS1, FGF9, UBASH3B, MYC, MYB, FLOT1, TSPO, KLF10, ZHX2, KLF13, SYK, CACNA2D4, FOS, TGFBR2, HLA-E, TNFRSF1A, MSH6, BCR, KIAA0922, BIN1, IRF1, IL1B, RARA, FAM20C, IRF8, TLR7, TRIB1, TRIB2, DBN1, ANAPC2, SASH3, RTN4R, CX3CR1, HDAC5, PHLPP1, LRP1, NLRC5, LRP5, STK39, ASAP1, PRKCZ, IQGAP3, ZFP36L2, RXRA, CHSY1, DVL…	306	2659	16792	1.83676	2.51957e-05	5.89668e-07	5.41204e-07
GOTERM_BP_ALL	GO:0006955~immune response	62	18.5075	5.19691e-09	LST1, ITGB2, ICAM2, HMGB1, ADARB1, ETS1, PHB2, IGF1R, LFNG, VPREB1, DUSP10, LGALS1, TRIM28, FCGRT, MYC, MYB, BLNK, FLOT1, CCR5, SYK, DAPK1, TUBB, TFEB, FOS, HLA-E, TNFRSF1A, MSH6, BCR, APBB1IP, IRF1, IL1B, PXDN, RARA, IRF8, CD48, TLR7, BLK, SASH3, CX3CR1, NLRC5, PRKCZ, LILRA5, CNR2, IRAK2, LAIR1, SLAMF1, GSDMD, CD74, CMTM3, OSM, LILRB2, TUBB4B, IGLL5, BCL6, BCL2, PTPN6, RAB17, LTBR, PIK3AP1, IL7R…	306	1551	16792	2.19362	2.53554e-05	5.89668e-07	5.41204e-07
GOTERM_BP_ALL	GO:0046634~regulation of alpha-beta T cell activation	13	3.8806	6.03315e-09	SASH3, SYK, HMGB1, RASAL3, PRKCZ, TGFBR2, HLA-E, BCL6, IRF1, MYB, RARA, ZBTB7B, ADA	306	72	16792	9.90813	2.94353e-05	6.68994e-07	6.1401e-07
GOTERM_BP_ALL	GO:1903708~positive regulation of hemopoiesis	18	5.37313	7.19303e-09	SASH3, KLF10, CD74, SYK, HMGB1, LILRB2, FOS, ETS1, PRKCZ, ACVR2A, TGFBR2, LGALS1, ID2, MYB, RARA, TRIB1, IL7R, ADA	306	163	16792	6.05991	3.50942e-05	7.79885e-07	7.15787e-07
GOTERM_BP_ALL	GO:0051249~regulation of lymphocyte activation	28	8.35821	8.80098e-09	SASH3, LST1, HMGB1, RASAL3, PRKCZ, ZFP36L2, LGALS1, MYB, ZBTB7B, SLAMF1, CD74, SYK, LILRB2, TGFBR2, HLA-E, MSH6, IGLL5, KIAA0922, BCL6, ID2, IRF1, IL1B, BCL2, RARA, PTPN6, TCF3, IL7R, ADA	306	411	16792	3.7385	4.29391e-05	9.33478e-07	8.56756e-07
GOTERM_BP_ALL	GO:0098602~single organism cell adhesion	40	11.9403	9.20581e-09	SASH3, TTYH1, CHD7, ITGB2, ICAM2, HMGB1, RASAL3, ETS1, PRKCZ, TRIOBP, ZFP36L2, LFNG, PREX1, CCND3, LGALS1, UBASH3B, MYB, FLOT1, ZBTB7B, SLAMF1, JAG2, CD74, SYK, LILRB2, TGFBR2, SMAD7, HLA-E, APBB1IP, HSH2D, KIAA0922, BCL6, IRF1, IL1B, BCL2, RARA, MYH9, CD48, PTPN6, IL7R, ADA	306	779	16792	2.81776	4.49141e-05	9.55641e-07	8.77098e-07
GOTERM_BP_ALL	GO:0050896~response to stimulus	201	60	9.89007e-09	SPI1, ANKLE1, LST1, ICAM2, STMN3, ADARB1, LDLRAD4, SMC6, PHB2, ELK3, PREX1, VPREB1, LGALS1, TRIM28, UBASH3B, MYC, MYB, CHAC1, JUNB, EPHB4, TNS1, DAPK1, CACNA2D4, HLA-E, BCR, KIAA0922, DDIT4, ATP6V0D1, TRIB1, TRIB2, PIF1, IQGAP3, PRKCZ, HIVEP3, HIVEP2, ATP6V1C1, SLAMF1, JAG2, VASP, HEXIM1, GSDMD, FZD3, BCL11A, INSR, INTS3, LPAR5, ID2, AGO2, SNAI1, ID3, GTF2IRD1, RGL1, ADA, CD22, DDR1, BTG2, DENND1…	306	8329	16792	1.32429	4.82525e-05	1.00528e-06	9.22661e-07
GOTERM_BP_ALL	GO:0031325~positive regulation of cellular metabolic process	92	27.4627	1.24675e-08	SCARB1, BTG2, SLC27A1, SPI1, ELL, CHD7, ITGB2, HMGB1, ETS1, PHB2, ETS2, IGF1R, ELK3, HERPUD1, CCND3, TRIM28, FGF9, MYC, MYB, PIM1, UBTF, FLOT1, TSPO, JUNB, ARRDC4, KLF13, SYK, DAPK1, RFC2, MSGN1, TFEB, EBF1, GAB1, FOS, CBFA2T3, TGFBR2, TNFRSF1A, MSH6, RNF144A, TBL1XR1, IRF1, IL1B, RARA, MYH9, IRF8, TLR7, MZF1, AURKAIP1, TRIB1, TRIB2, ANAPC2, HDAC5, AKNA, UHRF1, INSIG1, NLRC5, LRP5, DCUN1D2, PRKCZ…	306	2839	16792	1.77829	6.08273e-05	1.24141e-06	1.13938e-06
GOTERM_BP_ALL	GO:1902107~positive regulation of leukocyte differentiation	16	4.77612	1.57464e-08	SASH3, KLF10, CD74, SYK, HMGB1, LILRB2, FOS, PRKCZ, TGFBR2, LGALS1, ID2, MYB, RARA, TRIB1, IL7R, ADA	306	131	16792	6.70239	7.68238e-05	1.53653e-06	1.41025e-06
GOTERM_BP_ALL	GO:0045580~regulation of T cell differentiation	15	4.47761	1.72507e-08	SASH3, CD74, SYK, HMGB1, LILRB2, PRKCZ, TGFBR2, KIAA0922, BCL6, IRF1, MYB, RARA, ZBTB7B, IL7R, ADA	306	113	16792	7.2844	8.41626e-05	1.65032e-06	1.51468e-06
GOTERM_BP_ALL	GO:0023052~signaling	162	48.3582	1.97129e-08	SCARB1, SLC27A1, ICAM2, STMN3, LDLRAD4, PHB2, IGF1R, ELK3, PREX1, CCND3, LGALS1, TRIM28, FGF9, UBASH3B, FCGRT, MYC, PIM1, CHAC1, EPHB4, TNS1, DAPK1, CACNA2D4, HLA-E, ARHGAP45, BCR, MSH6, KIAA0922, KIF16B, TBL1XR1, DDIT4, S100A6, ATP6V0D1, TRIB1, TRIB2, ANAPC2, LY6E, RTN4R, BLK, PXK, INSIG1, STK39, SLC1A3, RASAL3, PRKCZ, IQGAP3, ZFP36L2, IRAK2, CASKIN2, DVL1, RHPN1, BMF, HIVEP3, HIVEP2, ZNF423, AT…	306	6260	16792	1.42011	9.61744e-05	1.8496e-06	1.69758e-06
GOTERM_BP_ALL	GO:0007154~cell communication	162	48.3582	2.37837e-08	SCARB1, SLC27A1, ICAM2, STMN3, LDLRAD4, PHB2, IGF1R, ELK3, PREX1, CCND3, LGALS1, TRIM28, FGF9, UBASH3B, FCGRT, MYC, PIM1, CHAC1, EPHB4, TNS1, DAPK1, HLA-E, ARHGAP45, BCR, MSH6, KIAA0922, KIF16B, TBL1XR1, DDIT4, S100A6, ATP6V0D1, TRIB1, TRIB2, ANAPC2, LY6E, RTN4R, BLK, PXK, INSIG1, STK39, SLC1A3, RASAL3, PRKCZ, IQGAP3, ZFP36L2, IRAK2, CASKIN2, DVL1, RHPN1, BMF, HIVEP3, HIVEP2, ZNF423, ATP6V1C1, BC…	306	6275	16792	1.41671	0.000116034	2.18944e-06	2.00949e-06
GOTERM_BP_ALL	GO:0050789~regulation of biological process	243	72.5373	2.66281e-08	SPI1, ANKLE1, LST1, ICAM2, STMN3, ADARB1, LDLRAD4, SMC6, PHB2, ELK3, PREX1, LGALS1, TRIM28, UBASH3B, MYC, MYB, CHAC1, SYNPO, JUNB, EPHB4, TNS1, ARRDC4, DAPK1, EBF1, CACNA2D4, HLA-E, BCR, KIAA0922, BIN1, DDIT4, AURKAIP1, ATP6V0D1, TRIB1, TRIB2, PIF1, TTYH1, DCUN1D2, IQGAP3, PRKCZ, HIVEP3, HIVEP2, ZBTB7B, ATP6V1C1, SLAMF1, JAG2, VASP, HEXIM1, GSDMD, CDT1, FZD3, BCL11A, INSR, INTS3, FOSL2, LPAR5, ID…	306	10922	16792	1.22091	0.00012991	2.4059e-06	2.20816e-06
GOTERM_BP_ALL	GO:0007165~signal transduction	152	45.3731	3.01989e-08	SCARB1, SLC27A1, ICAM2, STMN3, LDLRAD4, PHB2, IGF1R, ELK3, PREX1, CCND3, LGALS1, TRIM28, FGF9, UBASH3B, FCGRT, MYC, PIM1, CHAC1, EPHB4, TNS1, DAPK1, HLA-E, ARHGAP45, BCR, MSH6, KIAA0922, KIF16B, TBL1XR1, DDIT4, S100A6, ATP6V0D1, TRIB1, TRIB2, LY6E, RTN4R, BLK, INSIG1, STK39, RASAL3, PRKCZ, IQGAP3, ZFP36L2, IRAK2, CASKIN2, DVL1, RHPN1, BMF, HIVEP3, HIVEP2, ZNF423, ATP6V1C1, BCL9L, SLAMF1, HEXIM1, …	306	5775	16792	1.44435	0.000147329	2.67891e-06	2.45874e-06
GOTERM_BP_ALL	GO:0044700~single organism signaling	160	47.7612	3.74923e-08	SCARB1, SLC27A1, ICAM2, STMN3, LDLRAD4, PHB2, IGF1R, ELK3, PREX1, CCND3, LGALS1, TRIM28, FGF9, UBASH3B, FCGRT, MYC, PIM1, CHAC1, EPHB4, TNS1, DAPK1, CACNA2D4, HLA-E, ARHGAP45, BCR, MSH6, KIAA0922, KIF16B, TBL1XR1, DDIT4, S100A6, ATP6V0D1, TRIB1, TRIB2, ANAPC2, LY6E, RTN4R, BLK, INSIG1, STK39, SLC1A3, RASAL3, PRKCZ, IQGAP3, ZFP36L2, IRAK2, CASKIN2, DVL1, RHPN1, BMF, HIVEP3, HIVEP2, ZNF423, ATP6V1C…	306	6207	16792	1.41455	0.000182908	3.26651e-06	2.99804e-06
GOTERM_BP_ALL	GO:0009893~positive regulation of metabolic process	95	28.3582	4.72919e-08	SCARB1, BTG2, SLC27A1, SPI1, ELL, CHD7, ITGB2, HMGB1, ETS1, PHB2, ETS2, IGF1R, ELK3, HERPUD1, CCND3, TRIM28, FGF9, MYC, MYB, PIM1, UBTF, FLOT1, TSPO, JUNB, ARRDC4, KLF13, SYK, DAPK1, RFC2, MSGN1, TFEB, EBF1, GAB1, FOS, CBFA2T3, TGFBR2, TNFRSF1A, MSH6, RNF144A, TBL1XR1, IRF1, IL1B, RARA, MYH9, IRF8, TLR7, MZF1, AURKAIP1, TRIB1, TRIB2, ABCG1, ANAPC2, HDAC5, AKNA, UHRF1, INSIG1, NLRC5, LRP5, DCUN1D2…	306	3052	16792	1.70813	0.000230711	4.04802e-06	3.71532e-06
GOTERM_BP_ALL	GO:0002682~regulation of immune system process	55	16.4179	5.2899e-08	SPI1, LST1, ITGB2, ICAM2, HMGB1, ETS1, PHB2, DUSP10, LGALS1, UBASH3B, FCGRT, MYC, MYB, MYO18A, FLOT1, KLF10, KLF13, SYK, FOS, TGFBR2, HLA-E, MSH6, BCR, KIAA0922, IRF1, IL1B, RARA, CD48, TLR7, TRIB1, BLK, SASH3, PHLPP1, NLRC5, RASAL3, PRKCZ, ZFP36L2, CNR2, IRAK2, ZBTB7B, LAIR1, SLAMF1, CD74, CMTM3, LILRB2, ACVR2A, IGLL5, BCL6, ID2, BCL2, PTPN6, TCF3, PIK3AP1, IL7R, ADA	306	1378	16792	2.19025	0.000258061	4.4499e-06	4.08416e-06
GOTERM_BP_ALL	GO:0006366~transcription from RNA polymerase II promoter	66	19.7015	6.2e-08	BTG2, SPI1, ELL, CHD7, ATN1, HMGB1, ETS1, ETS2, ELK3, TRIM28, FGF9, MYC, MYB, JUNB, KLF10, ZHX2, KLF13, USP3, MSGN1, TFEB, EBF1, FOS, TNFRSF1A, TBL1XR1, IRF1, IL1B, RARA, IRF8, MZF1, HDAC5, AKNA, UHRF1, INSIG1, NLRC5, LRP5, AEBP1, AURKB, RXRA, DVL1, POLR2F, E2F2, HIVEP3, HIVEP2, ZNF423, ZBTB7B, POLR2J, BCL9L, TCFL5, HEXIM1, INTS1, BCL11A, INTS3, OSM, HMGA1, ACVR2A, FOSL2, SMAD7, BCL6, ID2, AGO2, …	306	1820	16792	1.99	0.000302452	5.12708e-06	4.70569e-06
GOTERM_BP_ALL	GO:0051251~positive regulation of lymphocyte activation	22	6.56716	6.87501e-08	SASH3, CD74, SYK, HMGB1, LILRB2, RASAL3, PRKCZ, TGFBR2, HLA-E, MSH6, IGLL5, LGALS1, BCL6, IL1B, MYB, BCL2, RARA, PTPN6, TCF3, IL7R, ADA, SLAMF1	306	287	16792	4.20651	0.000335376	5.59053e-06	5.13105e-06
GOTERM_BP_ALL	GO:0045596~negative regulation of cell differentiation	34	10.1493	7.07983e-08	RTN4R, HDAC5, LRP1, INSIG1, LRP5, ASAP1, HMGB1, LDLRAD4, ZFP36L2, DUSP10, LGALS1, UBASH3B, MYC, TSPO, CD74, ZHX2, KLF13, BCL11A, SEMA4B, SEMA4C, SMAD7, KIAA0922, COL5A1, BCL6, ID2, IRF1, BCL2, SNAI1, RARA, MDM2, ID3, TRIB1, TRIB2, ABCG1	306	640	16792	2.91528	0.000345365	5.6627e-06	5.19729e-06
GOTERM_BP_ALL	GO:0010604~positive regulation of macromolecule metabolic process	90	26.8657	7.47136e-08	BTG2, SLC27A1, SPI1, ELL, CHD7, HMGB1, ETS1, PHB2, ETS2, IGF1R, ELK3, HERPUD1, CCND3, TRIM28, FGF9, MYC, MYB, PIM1, UBTF, FLOT1, JUNB, ARRDC4, KLF13, SYK, DAPK1, RFC2, MSGN1, TFEB, EBF1, GAB1, FOS, CBFA2T3, TGFBR2, TNFRSF1A, MSH6, RNF144A, TBL1XR1, IRF1, IL1B, RARA, MYH9, IRF8, TLR7, MZF1, AURKAIP1, TRIB1, TRIB2, ANAPC2, HDAC5, AKNA, UHRF1, INSIG1, NLRC5, LRP5, DCUN1D2, PRKCZ, IQGAP3, ZFP36L2, AU…	306	2856	16792	1.72928	0.000364461	5.87948e-06	5.39625e-06
GOTERM_BP_ALL	GO:0048513~animal organ development	96	28.6567	7.84841e-08	DDR1, BTG2, DYRK3, SPI1, NAB2, CHD7, HMGB1, LDLRAD4, HNMT, ETS1, PHB2, LFNG, PREX1, PPP3CC, LGALS1, TRIM28, FGF9, UBASH3B, MYC, MYB, BLNK, FLOT1, TSPO, JUNB, EPHB4, KLF10, KLF13, SYK, GLRX5, TFEB, GAB1, TFIP11, TTC7A, FOS, CBFA2T3, TGFBR2, BCR, KIAA0922, TBL1XR1, IRF1, DDIT4, RARA, FAM20C, MYH9, IRF8, ATP6V0D1, TRIB1, SASH3, CX3CR1, HDAC5, LRP1, INSIG1, LRP5, AEBP1, PRKCZ, IQGAP3, ZFP36L2, RXRA, …	306	3129	16792	1.68363	0.000382851	6.07816e-06	5.5786e-06
GOTERM_BP_ALL	GO:0065009~regulation of molecular function	90	26.8657	8.37887e-08	GPSM1, SCARB1, SLC27A1, ELL, MTCL1, DENND1A, ITGB2, STMN3, HMGB1, ADARB1, PHB2, IGF1R, HERPUD1, LFNG, PREX1, CCND3, DUSP10, TRIM28, FGF9, UBASH3B, MYC, PSD4, PIM1, PHACTR3, FLOT1, ARRDC4, SYK, DUSP1, DAPK1, RFC2, GAB1, TFIP11, TRAF1, PPP2R5C, FOS, TGFBR2, ARHGAP45, MSH6, BCR, STIM2, IL1B, RARA, TBC1D24, TRIB1, TRIB2, ANAPC2, RTN4R, HDAC5, PIF1, PXK, LRP1, UHRF1, NLRC5, LRP5, STK39, DCUN1D2, DENND…	306	2863	16792	1.72505	0.000408721	6.38758e-06	5.86259e-06
GOTERM_BP_ALL	GO:0051716~cellular response to stimulus	172	51.3433	1.02255e-07	SCARB1, SLC27A1, SPI1, ANKLE1, ICAM2, STMN3, SMC6, LDLRAD4, ETS1, PHB2, IGF1R, ELK3, PREX1, CCND3, LGALS1, TRIM28, FGF9, UBASH3B, FCGRT, MYC, PIM1, CHAC1, JUNB, EPHB4, TNS1, DAPK1, USP3, HLA-E, ARHGAP45, BCR, MSH6, KIAA0922, KIF16B, TBL1XR1, DDIT4, S100A6, ATP6V0D1, TRIB1, TRIB2, LY6E, RTN4R, BLK, PIF1, RNASEH2B, INSIG1, STK39, RASAL3, PRKCZ, IQGAP3, ZFP36L2, IRAK2, CASKIN2, ALDH3B1, DVL1, RHPN1,…	306	6927	16792	1.36259	0.000498779	7.56763e-06	6.94566e-06
GOTERM_BP_ALL	GO:0009892~negative regulation of metabolic process	82	24.4776	1.0237e-07	BTG2, SLC27A1, SPI1, ELL, NAB2, ATN1, HMGB1, ADARB1, LDLRAD4, PHB2, ETS2, IGF1R, ELK3, HERPUD1, DUSP10, TRIM28, FGF9, BCL7A, UBASH3B, MYC, SCMH1, MYB, TSPO, PMEPA1, CHAC1, JUNB, BAHCC1, KLF10, ZHX2, DUSP1, DAPK1, USP3, TFIP11, CBFA2T3, MSH6, TBL1XR1, IRF1, IL1B, DDIT4, RARA, IRF8, MZF1, TRIB1, TRIB2, ANAPC2, RTN4R, HDAC5, PIF1, RNASEH2B, UHRF1, NXN, INSIG1, LRP5, STK39, AEBP1, PRKCZ, IQGAP3, ZFP3…	306	2522	16792	1.78423	0.000499339	7.56763e-06	6.94566e-06
GOTERM_BP_ALL	GO:0008283~cell proliferation	66	19.7015	1.42134e-07	DDR1, SCARB1, BTG2, LST1, NAB2, HMGB1, ADARB1, ETS1, PHB2, IGF1R, CCND3, FGF9, MYC, PIM1, TSPO, JUNB, KLF10, EGFL7, KLF13, SYK, GAB1, PPP2R5C, CBFA2T3, TGFBR2, HLA-E, KIAA0922, BIN1, IRF1, IL1B, DDIT4, S100A6, RARA, TRIB1, DBN1, SASH3, CX3CR1, RNASEH2B, LRP1, UHRF1, INSIG1, LRP5, RASAL3, PRKCZ, IQGAP3, ZFP36L2, AURKB, RXRA, CREG1, SLAMF1, RBM38, CD74, FZD3, INSR, OSM, HMGA1, LILRB2, ACVR2A, FOSL2…	306	1861	16792	1.94616	0.000693233	1.02979e-05	9.45153e-06
GOTERM_BP_ALL	GO:0022409~positive regulation of cell-cell adhesion	20	5.97015	1.43525e-07	SASH3, CD74, SYK, HMGB1, LILRB2, RASAL3, ETS1, PRKCZ, TGFBR2, SMAD7, HLA-E, LGALS1, IL1B, MYB, FLOT1, RARA, PTPN6, IL7R, ADA, SLAMF1	306	248	16792	4.42547	0.000700012	1.02979e-05	9.45153e-06
GOTERM_BP_ALL	GO:0010605~negative regulation of macromolecule metabolic process	77	22.9851	1.46552e-07	BTG2, SPI1, NAB2, ATN1, HMGB1, ADARB1, LDLRAD4, PHB2, ETS2, IGF1R, ELK3, HERPUD1, DUSP10, TRIM28, FGF9, BCL7A, UBASH3B, MYC, SCMH1, MYB, TSPO, PMEPA1, CHAC1, JUNB, BAHCC1, KLF10, ZHX2, DUSP1, DAPK1, USP3, TFIP11, CBFA2T3, MSH6, TBL1XR1, IRF1, IL1B, DDIT4, RARA, IRF8, MZF1, TRIB1, TRIB2, ANAPC2, RTN4R, HDAC5, PIF1, RNASEH2B, UHRF1, NXN, LRP5, STK39, AEBP1, PRKCZ, IQGAP3, ZFP36L2, AURKB, RXRA, CREG…	306	2326	16792	1.81661	0.000714772	1.03627e-05	9.51101e-06
GOTERM_BP_ALL	GO:0046631~alpha-beta T cell activation	14	4.1791	1.52214e-07	SASH3, SYK, HMGB1, RASAL3, PRKCZ, TGFBR2, HLA-E, BCL6, IRF1, MYB, BCL2, RARA, ZBTB7B, ADA	306	114	16792	6.73914	0.000742378	1.06093e-05	9.73736e-06
GOTERM_BP_ALL	GO:0022407~regulation of cell-cell adhesion	25	7.46269	1.69615e-07	SASH3, HMGB1, RASAL3, ETS1, PRKCZ, LGALS1, UBASH3B, MYB, FLOT1, ZBTB7B, SLAMF1, CD74, SYK, LILRB2, TGFBR2, SMAD7, HLA-E, KIAA0922, BCL6, IRF1, IL1B, RARA, PTPN6, IL7R, ADA	306	386	16792	3.55413	0.000827209	1.16556e-05	1.06977e-05
GOTERM_BP_ALL	GO:0051241~negative regulation of multicellular organismal process	44	13.1343	1.96674e-07	CX3CR1, RTN4R, HDAC5, LRP1, NLRC5, LRP5, STK39, ASAP1, HMGB1, LDLRAD4, PHB2, LFNG, DUSP10, LGALS1, CHSY1, UBASH3B, MYC, TSPO, SLAMF1, CD74, ZHX2, FZD3, KLF13, BCL11A, SEMA4B, SEMA4C, TGFBR2, SMAD7, BCR, KIAA0922, COL5A1, BCL6, ID2, IRF1, IL1B, BCL2, SNAI1, RARA, MDM2, ID3, BCOR, TRIB1, TRIB2, ADA	306	1017	16792	2.37417	0.00095911	1.33274e-05	1.2232e-05
GOTERM_BP_ALL	GO:0051093~negative regulation of developmental process	36	10.7463	2.17716e-07	CX3CR1, RTN4R, HDAC5, LRP1, ASAP1, HMGB1, LDLRAD4, PHB2, LFNG, DUSP10, LGALS1, UBASH3B, MYC, TSPO, CD74, ZHX2, FZD3, KLF13, BCL11A, SEMA4B, SEMA4C, TGFBR2, SMAD7, BCR, KIAA0922, COL5A1, BCL6, ID2, IRF1, BCL2, SNAI1, RARA, MDM2, ID3, BCOR, TRIB1	306	739	16792	2.67325	0.00106167	1.45512e-05	1.33552e-05
GOTERM_BP_ALL	GO:0030155~regulation of cell adhesion	33	9.85075	2.50788e-07	DDR1, SASH3, HMGB1, RASAL3, ETS1, PRKCZ, TRIOBP, PREX1, LGALS1, UBASH3B, MYB, FLOT1, ZBTB7B, CYTH1, SLAMF1, JAG2, CD74, SYK, TBCD, LILRB2, TGFBR2, SMAD7, HLA-E, APBB1IP, KIAA0922, BCL6, IRF1, IL1B, BCL2, RARA, PTPN6, IL7R, ADA	306	643	16792	2.81633	0.00122285	1.65351e-05	1.51761e-05
GOTERM_BP_ALL	GO:0002696~positive regulation of leukocyte activation	22	6.56716	2.66809e-07	SASH3, CD74, SYK, HMGB1, LILRB2, RASAL3, PRKCZ, TGFBR2, HLA-E, MSH6, IGLL5, LGALS1, BCL6, IL1B, MYB, BCL2, RARA, PTPN6, TCF3, IL7R, ADA, SLAMF1	306	311	16792	3.88189	0.00130091	1.72139e-05	1.57991e-05
GOTERM_BP_ALL	GO:0048585~negative regulation of response to stimulus	53	15.8209	2.68141e-07	STMN3, LDLRAD4, ETS1, PHB2, IGF1R, HERPUD1, LFNG, DUSP10, FGF9, UBASH3B, MYC, PMEPA1, CHAC1, EGFL7, DUSP1, DAPK1, TFIP11, TGFBR2, HLA-E, TNFRSF1A, BCR, KIAA0922, IL1B, DDIT4, PXDN, TRIB1, RTN4R, CX3CR1, PHLPP1, LRP1, NXN, NLRC5, RASAL3, PRKCZ, CNR2, DVL1, BCL9L, SLAMF1, CD74, SEMA4B, SEMA4C, LILRB2, SMAD7, PTPRE, BCL6, BCL2, SNAI1, MDM2, PTPN6, RGS12, PIK3AP1, IL7R, ADA	306	1369	16792	2.12448	0.0013074	1.72139e-05	1.57991e-05
GOTERM_BP_ALL	GO:1903037~regulation of leukocyte cell-cell adhesion	22	6.56716	2.95757e-07	SASH3, CD74, SYK, HMGB1, LILRB2, RASAL3, ETS1, PRKCZ, TGFBR2, HLA-E, KIAA0922, LGALS1, BCL6, IL1B, IRF1, MYB, RARA, PTPN6, ZBTB7B, IL7R, ADA, SLAMF1	306	313	16792	3.85709	0.00144196	1.86312e-05	1.70999e-05
GOTERM_BP_ALL	GO:0046637~regulation of alpha-beta T cell differentiation	10	2.98507	2.97855e-07	SASH3, SYK, BCL6, MYB, RARA, HMGB1, ZBTB7B, PRKCZ, ADA, TGFBR2	306	51	16792	10.76	0.00145218	1.86312e-05	1.70999e-05
GOTERM_BP_ALL	GO:0050867~positive regulation of cell activation	22	6.56716	4.26101e-07	SASH3, CD74, SYK, HMGB1, LILRB2, RASAL3, PRKCZ, TGFBR2, HLA-E, MSH6, IGLL5, LGALS1, BCL6, IL1B, MYB, BCL2, RARA, PTPN6, TCF3, IL7R, ADA, SLAMF1	306	320	16792	3.77271	0.00207679	2.62192e-05	2.40642e-05
GOTERM_BP_ALL	GO:0031324~negative regulation of cellular metabolic process	76	22.6866	4.29911e-07	BTG2, SLC27A1, SPI1, ELL, NAB2, ATN1, HMGB1, ADARB1, LDLRAD4, PHB2, ETS2, IGF1R, ELK3, HERPUD1, DUSP10, TRIM28, FGF9, BCL7A, UBASH3B, MYC, SCMH1, MYB, TSPO, PMEPA1, CHAC1, JUNB, BAHCC1, KLF10, ZHX2, DUSP1, DAPK1, USP3, TFIP11, CBFA2T3, MSH6, TBL1XR1, IRF1, IL1B, DDIT4, RARA, IRF8, MZF1, TRIB1, TRIB2, ANAPC2, RTN4R, HDAC5, PIF1, UHRF1, NXN, INSIG1, LRP5, STK39, AEBP1, PRKCZ, ZFP36L2, AURKB, RXRA, …	306	2345	16792	1.77849	0.00209534	2.62192e-05	2.40642e-05
GOTERM_BP_ALL	GO:0065007~biological regulation	249	74.3284	4.37355e-07	SPI1, ANKLE1, LST1, ICAM2, STMN3, ADARB1, LDLRAD4, SMC6, PHB2, ELK3, PREX1, LGALS1, TRIM28, UBASH3B, MYC, MYB, CHAC1, SYNPO, JUNB, EPHB4, TNS1, ARRDC4, DAPK1, EBF1, CACNA2D4, HLA-E, BCR, KIAA0922, BIN1, DDIT4, AURKAIP1, ATP6V0D1, TRIB1, TRIB2, PIF1, TTYH1, DCUN1D2, IQGAP3, PRKCZ, HIVEP3, HIVEP2, ZBTB7B, ATP6V1C1, SLAMF1, JAG2, VASP, HEXIM1, GSDMD, CDT1, FZD3, BCL11A, INSR, INTS3, FOSL2, LPAR5, ID…	306	11548	16792	1.18324	0.00213158	2.63439e-05	2.41787e-05
GOTERM_BP_ALL	GO:0046632~alpha-beta T cell differentiation	12	3.58209	4.87038e-07	SASH3, SYK, BCL6, IRF1, MYB, BCL2, RARA, HMGB1, ZBTB7B, PRKCZ, ADA, TGFBR2	306	87	16792	7.56908	0.00237344	2.89788e-05	2.6597e-05
GOTERM_BP_ALL	GO:1903039~positive regulation of leukocyte cell-cell adhesion	18	5.37313	5.13449e-07	SASH3, CD74, SYK, HMGB1, LILRB2, RASAL3, ETS1, PRKCZ, TGFBR2, HLA-E, LGALS1, IL1B, MYB, RARA, PTPN6, IL7R, ADA, SLAMF1	306	218	16792	4.53103	0.00250198	3.01821e-05	2.77015e-05
GOTERM_BP_ALL	GO:0002819~regulation of adaptive immune response	14	4.1791	5.9255e-07	SASH3, HMGB1, PRKCZ, HLA-E, MSH6, DUSP10, BCL6, IL1B, IRF1, CD48, PTPN6, IL7R, ADA, SLAMF1	306	128	16792	6.00204	0.00288688	3.4342e-05	3.15194e-05
GOTERM_BP_ALL	GO:0050863~regulation of T cell activation	21	6.26866	5.98292e-07	SASH3, CD74, SYK, HMGB1, LILRB2, RASAL3, PRKCZ, TGFBR2, HLA-E, KIAA0922, LGALS1, BCL6, IL1B, IRF1, MYB, RARA, PTPN6, ZBTB7B, IL7R, ADA, SLAMF1	306	299	16792	3.85415	0.00291481	3.4342e-05	3.15194e-05
GOTERM_BP_ALL	GO:0050670~regulation of lymphocyte proliferation	17	5.07463	6.93404e-07	SASH3, CD74, SYK, LST1, HMGB1, LILRB2, RASAL3, HLA-E, KIAA0922, BCL6, IL1B, IRF1, BCL2, PTPN6, TCF3, ADA, SLAMF1	306	198	16792	4.71156	0.0033774	3.93386e-05	3.61054e-05
GOTERM_BP_ALL	GO:0032944~regulation of mononuclear cell proliferation	17	5.07463	7.41931e-07	SASH3, CD74, SYK, LST1, HMGB1, LILRB2, RASAL3, HLA-E, KIAA0922, BCL6, IL1B, IRF1, BCL2, PTPN6, TCF3, ADA, SLAMF1	306	199	16792	4.68788	0.00361334	4.16078e-05	3.81881e-05
GOTERM_BP_ALL	GO:0042127~regulation of cell proliferation	56	16.7164	1.02944e-06	DDR1, BTG2, LST1, HMGB1, ADARB1, ETS1, PHB2, IGF1R, FGF9, MYC, TSPO, JUNB, KLF10, EGFL7, KLF13, SYK, PPP2R5C, CBFA2T3, TGFBR2, HLA-E, TNFRSF1A, KIAA0922, IRF1, IL1B, S100A6, RARA, TRIB1, BLK, SASH3, CX3CR1, RNASEH2B, LRP5, RASAL3, PRKCZ, IQGAP3, SLAMF1, TCFL5, JAG2, RBM38, CD74, FZD3, INSR, OSM, HMGA1, LILRB2, TPD52L2, FOSL2, BCL6, ID2, BCL2, MDM2, PTPN6, TCF3, LTBR, PLCD3, ADA	306	1552	16792	1.98006	0.00501005	5.70755e-05	5.23845e-05
GOTERM_BP_ALL	GO:0007166~cell surface receptor signaling pathway	82	24.4776	1.11295e-06	DDR1, SCARB1, SLC27A1, ITGB2, ICAM2, LDLRAD4, IGF1R, LFNG, FGF9, FCGRT, MYC, SPIN1, BLNK, PMEPA1, CHAC1, CCR5, EPHB4, KLF10, EGFL7, SYK, DAPK1, RHBDF2, GAB1, TRAF1, FOS, TGFBR2, HLA-E, TNFRSF1A, BCR, KIAA0922, KIF16B, TBL1XR1, IRF1, IL1B, DDIT4, PXDN, MYH9, IRF8, ATP6V0D1, TRIB1, LY6E, BLK, RTN4R, CX3CR1, LRP1, NXN, NLRC5, LRP5, PRKCZ, CHSY1, IRAK2, DVL1, POLR2F, ZNF423, POLR2J, ATP6V1C1, BCL9L, …	306	2669	16792	1.68596	0.00541535	6.10119e-05	5.59974e-05
GOTERM_BP_ALL	GO:0051128~regulation of cellular component organization	74	22.0896	1.26551e-06	DDR1, SCARB1, SPI1, MTCL1, LST1, ITGB2, STMN3, HMGB1, LDLRAD4, HNMT, SYNE3, ETS1, PHB2, TRIOBP, PREX1, PPP3CC, LGALS1, TRIM28, MYC, MYB, MYO18A, FLOT1, TSPO, PMEPA1, SYNPO, SYK, DUSP1, TFIP11, TGFBR2, BCR, BIN1, IL1B, TBC1D24, MYH9, IRF8, AURKAIP1, DBN1, ANAPC2, BLK, RTN4R, HDAC5, PIF1, LRP1, UHRF1, INSIG1, LRP5, ASAP1, PRKCZ, AURKB, NCLN, SLC17A9, DVL1, BMF, BUB3, BCL9L, SLAMF1, VASP, BCL11A, SE…	306	2323	16792	1.74809	0.00615539	6.86046e-05	6.2966e-05
GOTERM_BP_ALL	GO:0030099~myeloid cell differentiation	22	6.56716	1.31503e-06	KLF10, DYRK3, SPI1, KLF13, HMGB1, FOS, ETS1, CBFA2T3, ACVR2A, TGFBR2, BCL6, UBASH3B, MYC, ID2, RARA, IRF8, FAM20C, MYH9, PTPN6, LTBR, TRIB1, JUNB	306	343	16792	3.51973	0.00639548	7.05057e-05	6.47109e-05
GOTERM_BP_ALL	GO:0070663~regulation of leukocyte proliferation	17	5.07463	1.33639e-06	SASH3, CD74, SYK, LST1, HMGB1, LILRB2, RASAL3, HLA-E, KIAA0922, BCL6, IL1B, IRF1, BCL2, PTPN6, TCF3, ADA, SLAMF1	306	208	16792	4.48504	0.00649902	7.08721e-05	6.50472e-05
GOTERM_BP_ALL	GO:0050870~positive regulation of T cell activation	17	5.07463	1.5161e-06	SASH3, CD74, SYK, HMGB1, LILRB2, RASAL3, PRKCZ, TGFBR2, HLA-E, LGALS1, IL1B, MYB, RARA, PTPN6, IL7R, ADA, SLAMF1	306	210	16792	4.44233	0.00736977	7.95383e-05	7.30011e-05
GOTERM_BP_ALL	GO:0046651~lymphocyte proliferation	19	5.67164	1.59536e-06	SASH3, CD74, SYK, LST1, HMGB1, LILRB2, RASAL3, HLA-E, CCND3, KIAA0922, BCL6, IL1B, IRF1, BCL2, PTPN6, TCF3, IL7R, ADA, SLAMF1	306	263	16792	3.96441	0.00775357	8.27854e-05	7.59813e-05
GOTERM_BP_ALL	GO:0045597~positive regulation of cell differentiation	37	11.0448	1.61193e-06	SASH3, CX3CR1, LRP5, HMGB1, ETS1, PRKCZ, TRIOBP, PREX1, LGALS1, MYC, MYB, DVL1, FLOT1, TSPO, JUNB, BCL9L, KLF10, CD74, FZD3, SYK, BCL11A, LILRB2, FOS, ACVR2A, TGFBR2, BCL6, BIN1, ID2, BCL2, SNAI1, RARA, FAM20C, TCF3, TRIB1, IL7R, ADA, ANAPC2	306	841	16792	2.41427	0.00783377	8.27854e-05	7.59813e-05
GOTERM_BP_ALL	GO:0032943~mononuclear cell proliferation	19	5.67164	1.77534e-06	SASH3, CD74, SYK, LST1, HMGB1, LILRB2, RASAL3, HLA-E, CCND3, KIAA0922, BCL6, IL1B, IRF1, BCL2, PTPN6, TCF3, IL7R, ADA, SLAMF1	306	265	16792	3.93449	0.00862447	9.02278e-05	8.28121e-05
GOTERM_BP_ALL	GO:0032501~multicellular organismal process	169	50.4478	1.80752e-06	SCARB1, SLC27A1, SPI1, LST1, NAB2, ATN1, STMN3, LDLRAD4, HNMT, ETS1, PHB2, ETS2, ELK3, PREX1, TCL1A, LGALS1, TRIM28, FGF9, UBASH3B, MYC, SCMH1, MYB, PIM1, CHAC1, RPS11, JUNB, EPHB4, EBF1, TTC7A, CACNA2D4, HLA-E, BCR, MSH6, KIAA0922, KATNAL1, BIN1, KIF16B, TBL1XR1, DDIT4, TBC1D24, S100A6, ATP6V0D1, TRIB1, TRIB2, ABCG1, ANAPC2, RTN4R, RNASEH2B, INSIG1, STK39, SLC1A3, AEBP1, PRKCZ, IQGAP3, ZFP36L2, …	306	7027	16792	1.31977	0.00878014	9.09165e-05	8.34442e-05
GOTERM_BP_ALL	GO:0006950~response to stress	103	30.7463	1.87148e-06	SCARB1, SLC27A1, ANKLE1, ICAM2, SMC6, ADARB1, HNMT, ETS1, PHB2, IGF1R, ELK3, LGALS1, TRIM28, UBASH3B, MYC, CHAC1, DAPK1, USP3, HLA-E, BCR, MSH6, DDIT4, ATP6V0D1, TRIB1, BLK, PIF1, RNASEH2B, PXK, INSIG1, STK39, SLC1A3, PRKCZ, ZFP36L2, IRAK2, ALDH3B1, SLAMF1, GSDMD, INTS3, HMGA1, HPS4, SMAD7, COL5A1, BCL6, ID2, MAFF, BCL2, MDM2, SNAI1, ID3, ADA, DDR1, BTG2, ITGB2, HMGB1, RCSD1, HERPUD1, DUSP10, BLN…	306	3677	16792	1.53718	0.00908939	9.31729e-05	8.55151e-05
GOTERM_BP_ALL	GO:0050790~regulation of catalytic activity	74	22.0896	2.17914e-06	GPSM1, SCARB1, SLC27A1, ELL, MTCL1, DENND1A, STMN3, HMGB1, ADARB1, IGF1R, HERPUD1, PREX1, CCND3, DUSP10, FGF9, UBASH3B, MYC, PSD4, PIM1, PHACTR3, ARRDC4, SYK, DUSP1, DAPK1, RFC2, GAB1, TFIP11, PPP2R5C, TGFBR2, ARHGAP45, MSH6, BCR, IL1B, TBC1D24, TRIB1, TRIB2, ANAPC2, RTN4R, PIF1, PXK, LRP1, UHRF1, NLRC5, LRP5, DCUN1D2, DENND3, ASAP1, RASAL3, PRKCZ, IQGAP3, RASIP1, AURKB, CYTH4, CNR2, IRAK2, DVL1,…	306	2357	16792	1.72287	0.0105757	0.000107394	9.85675e-05
GOTERM_BP_ALL	GO:0045785~positive regulation of cell adhesion	23	6.86567	2.29327e-06	SASH3, CD74, SYK, HMGB1, LILRB2, RASAL3, ETS1, PRKCZ, TRIOBP, TGFBR2, SMAD7, HLA-E, APBB1IP, PREX1, LGALS1, IL1B, MYB, FLOT1, RARA, PTPN6, IL7R, ADA, SLAMF1	306	385	16792	3.2783	0.0111265	0.000111888	0.000102692
GOTERM_BP_ALL	GO:0002683~negative regulation of immune system process	23	6.86567	2.60648e-06	CD74, KLF13, LST1, NLRC5, HMGB1, LILRB2, HLA-E, BCR, KIAA0922, DUSP10, CNR2, BCL6, UBASH3B, MYC, ID2, IRF1, RARA, PTPN6, PIK3AP1, TRIB1, IL7R, ADA, SLAMF1	306	388	16792	3.25295	0.0126365	0.000125911	0.000115563
GOTERM_BP_ALL	GO:0042113~B cell activation	18	5.37313	2.73162e-06	SASH3, CD74, HDAC5, SYK, POLM, ZFP36L2, MSH6, LFNG, IGLL5, LGALS1, BCL6, ID2, BLNK, BCL2, PTPN6, TCF3, IL7R, ADA	306	246	16792	4.0153	0.0132392	0.000130663	0.000119924
GOTERM_BP_ALL	GO:0009968~negative regulation of signal transduction	43	12.8358	2.9835e-06	CX3CR1, RTN4R, PHLPP1, LRP1, NXN, NLRC5, STMN3, LDLRAD4, RASAL3, PHB2, PRKCZ, IGF1R, HERPUD1, LFNG, DUSP10, FGF9, UBASH3B, MYC, DVL1, PMEPA1, CHAC1, BCL9L, SLAMF1, CD74, EGFL7, DAPK1, DUSP1, TGFBR2, SMAD7, PTPRE, KIAA0922, BCL6, IL1B, DDIT4, PXDN, BCL2, SNAI1, MDM2, PTPN6, RGS12, PIK3AP1, TRIB1, ADA	306	1089	16792	2.16681	0.0144511	0.000139966	0.000128463
GOTERM_BP_ALL	GO:0051094~positive regulation of developmental process	43	12.8358	2.9835e-06	SASH3, CX3CR1, CHD7, ITGB2, HMGB1, ETS1, PRKCZ, IQGAP3, TRIOBP, PREX1, LGALS1, FGF9, MYC, MYB, DVL1, FLOT1, TSPO, BCL9L, KLF10, CD74, FZD3, SYK, BCL11A, INSR, HMGA1, LILRB2, FOS, ACVR2A, TGFBR2, MSH6, BCL6, BIN1, ID2, IL1B, BCL2, SNAI1, RARA, FAM20C, TCF3, TRIB1, IL7R, ADA, ANAPC2	306	1089	16792	2.16681	0.0144511	0.000139966	0.000128463
GOTERM_BP_ALL	GO:0044763~single-organism cellular process	257	76.7164	3.47871e-06	SPI1, ANKLE1, CERK, LST1, ICAM2, STMN3, ADARB1, LDLRAD4, SMC6, ENO2, PHB2, ELK3, PREX1, LGALS1, TRIM28, UBASH3B, MYC, MYB, CHAC1, RPS11, SYNPO, JUNB, EPHB4, TNS1, MECR, DAPK1, CACNA2D4, HLA-E, BCR, KIAA0922, KATNAL1, BIN1, DDIT4, AURKAIP1, ATP6V0D1, TRIB1, TRIB2, TTYH1, IQGAP3, PRKCZ, ST3GAL4, HIVEP3, HIVEP2, ZBTB7B, ATP6V1C1, SLAMF1, JAG2, VASP, HEXIM1, GSDMD, CDT1, FZD3, BCL11A, INSR, INTS3, MC…	306	12256	16792	1.15071	0.0168294	0.000161644	0.000148359
GOTERM_BP_ALL	GO:0051254~positive regulation of RNA metabolic process	51	15.2239	3.77766e-06	BTG2, SPI1, ELL, CHD7, HMGB1, ETS1, ETS2, ELK3, TRIM28, MYC, MYB, UBTF, JUNB, KLF13, MSGN1, TFEB, EBF1, FOS, TNFRSF1A, TBL1XR1, IRF1, IL1B, RARA, IRF8, MZF1, HDAC5, AKNA, UHRF1, INSIG1, NLRC5, LRP5, ZFP36L2, RXRA, DVL1, POLR2F, HIVEP3, ZNF423, POLR2J, BCL9L, BCL11A, INSR, OSM, HMGA1, ACVR2A, FOSL2, SMAD7, ID2, AGO2, MAFF, SNAI1, TCF3	306	1415	16792	1.97786	0.0182624	0.000173879	0.000159588
GOTERM_BP_ALL	GO:0070661~leukocyte proliferation	19	5.67164	3.83061e-06	SASH3, CD74, SYK, LST1, HMGB1, LILRB2, RASAL3, HLA-E, CCND3, KIAA0922, BCL6, IL1B, IRF1, BCL2, PTPN6, TCF3, IL7R, ADA, SLAMF1	306	280	16792	3.72372	0.018516	0.000174668	0.000160313
GOTERM_BP_ALL	GO:0031399~regulation of protein modification process	57	17.0149	4.00446e-06	SLC27A1, SPI1, ITGB2, HMGB1, ADARB1, LDLRAD4, PHB2, IGF1R, HERPUD1, CCND3, DUSP10, FGF9, UBASH3B, MYC, MYB, PIM1, FLOT1, TSPO, PMEPA1, ARRDC4, SYK, DUSP1, GAB1, TGFBR2, TNFRSF1A, IL1B, DDIT4, TLR7, TRIB1, TRIB2, ANAPC2, RTN4R, HDAC5, PHLPP1, NXN, LRP5, STK39, DCUN1D2, PRKCZ, IQGAP3, IRAK2, DVL1, BUB3, SLAMF1, HEXIM1, CD74, INSR, SEMA4C, OSM, ACVR2A, SMAD7, BCL6, BCL2, CDK2AP1, PTPN6, LTBR, BCOR	306	1664	16792	1.87976	0.0193482	0.000180905	0.000166037
GOTERM_BP_ALL	GO:0045582~positive regulation of T cell differentiation	10	2.98507	4.16729e-06	SASH3, CD74, SYK, MYB, RARA, LILRB2, IL7R, PRKCZ, ADA, TGFBR2	306	69	16792	7.95302	0.020127	0.000186534	0.000171203
GOTERM_BP_ALL	GO:0010648~negative regulation of cell communication	45	13.4328	4.3014e-06	CX3CR1, RTN4R, PHLPP1, LRP1, NXN, NLRC5, STMN3, LDLRAD4, RASAL3, PHB2, PRKCZ, IGF1R, HERPUD1, LFNG, DUSP10, FGF9, UBASH3B, CNR2, MYC, DVL1, PMEPA1, CHAC1, BCL9L, SLAMF1, CD74, EGFL7, DAPK1, DUSP1, OSM, TGFBR2, SMAD7, PTPRE, KIAA0922, BCL6, IL1B, DDIT4, PXDN, BCL2, SNAI1, MDM2, PTPN6, RGS12, PIK3AP1, TRIB1, ADA	306	1182	16792	2.08918	0.0207679	0.000190787	0.000175106
GOTERM_BP_ALL	GO:0016477~cell migration	45	13.4328	4.42828e-06	DDR1, CX3CR1, HDAC5, SCARB1, LRP1, ITGB2, LRP5, HMGB1, ADARB1, LDLRAD4, ETS1, PRKCZ, IGF1R, PREX1, CNR2, MYC, MYO18A, TSPO, CCR5, EPHB4, TNS1, CD74, FZD3, SYK, SEMA4B, INSR, SEMA4C, NAV1, TGFBR2, SMAD7, BCR, SLC7A5, FMNL1, COL5A1, IL1B, DDIT4, BCL2, SNAI1, MDM2, MYH9, CD48, PTPN6, LGR6, TRIB1, ADA	306	1184	16792	2.08565	0.0213739	0.000194645	0.000178647
GOTERM_BP_ALL	GO:0023057~negative regulation of signaling	45	13.4328	4.61986e-06	CX3CR1, RTN4R, PHLPP1, LRP1, NXN, NLRC5, STMN3, LDLRAD4, RASAL3, PHB2, PRKCZ, IGF1R, HERPUD1, LFNG, DUSP10, FGF9, UBASH3B, CNR2, MYC, DVL1, PMEPA1, CHAC1, BCL9L, SLAMF1, CD74, EGFL7, DAPK1, DUSP1, OSM, TGFBR2, SMAD7, PTPRE, KIAA0922, BCL6, IL1B, DDIT4, PXDN, BCL2, SNAI1, MDM2, PTPN6, RGS12, PIK3AP1, TRIB1, ADA	306	1186	16792	2.08213	0.0222882	0.000201253	0.000184712
GOTERM_BP_ALL	GO:0009653~anatomical structure morphogenesis	79	23.5821	4.69075e-06	DDR1, SPI1, LST1, NAB2, CHD7, ITGB2, HMGB1, LDLRAD4, SYNE3, ETS1, PHB2, ETS2, TRIOBP, ELK3, LFNG, PREX1, TRIM28, FGF9, MYC, SCMH1, FLOT1, JUNB, EPHB4, EGFL7, SYK, DUSP1, MSGN1, TGFBR2, BCR, KIF16B, IL1B, S100A6, RARA, TBC1D24, FAM20C, MYH9, ATP6V0D1, ANAPC2, RTN4R, CX3CR1, HDAC5, LRP1, INSIG1, LRP5, SLC1A3, ASAP1, PRKCZ, RASIP1, RXRA, CHSY1, DVL1, BCL9L, JAG2, IRX1, VASP, FZD3, BCL11A, SEMA4B, IN…	306	2631	16792	1.64773	0.0226263	0.000201529	0.000184966
GOTERM_BP_ALL	GO:0046635~positive regulation of alpha-beta T cell activation	9	2.68657	4.70882e-06	SASH3, SYK, MYB, RARA, RASAL3, PRKCZ, ADA, TGFBR2, HLA-E	306	53	16792	9.31853	0.0227125	0.000201529	0.000184966
GOTERM_BP_ALL	GO:0002684~positive regulation of immune system process	39	11.6418	5.14045e-06	BLK, SASH3, ITGB2, NLRC5, ICAM2, HMGB1, RASAL3, ETS1, PRKCZ, LGALS1, IRAK2, MYB, MYO18A, FLOT1, SLAMF1, KLF10, CD74, SYK, CMTM3, LILRB2, FOS, ACVR2A, TGFBR2, HLA-E, MSH6, IGLL5, BCL6, ID2, IRF1, IL1B, BCL2, RARA, PTPN6, TLR7, TCF3, PIK3AP1, TRIB1, IL7R, ADA	306	960	16792	2.22933	0.0247684	0.000218089	0.000200165
GOTERM_BP_ALL	GO:0050671~positive regulation of lymphocyte proliferation	13	3.8806	5.19375e-06	SASH3, CD74, SYK, HMGB1, LILRB2, RASAL3, HLA-E, BCL6, IL1B, BCL2, TCF3, ADA, SLAMF1	306	132	16792	5.40444	0.025022	0.000218451	0.000200497
GOTERM_BP_ALL	GO:0032946~positive regulation of mononuclear cell proliferation	13	3.8806	5.61745e-06	SASH3, CD74, SYK, HMGB1, LILRB2, RASAL3, HLA-E, BCL6, IL1B, BCL2, TCF3, ADA, SLAMF1	306	133	16792	5.3638	0.0270354	0.000234252	0.000214999
GOTERM_BP_ALL	GO:0031327~negative regulation of cellular biosynthetic process	52	15.5224	6.09493e-06	BTG2, SLC27A1, SPI1, NAB2, ATN1, HMGB1, PHB2, ETS2, ELK3, TRIM28, FGF9, BCL7A, MYC, SCMH1, MYB, TSPO, JUNB, BAHCC1, KLF10, ZHX2, DUSP1, DAPK1, USP3, CBFA2T3, TBL1XR1, IRF1, RARA, IRF8, MZF1, TRIB2, HDAC5, PIF1, UHRF1, INSIG1, AEBP1, ZFP36L2, AURKB, RXRA, CREG1, ZNF423, HEXIM1, BCL11A, HMGA1, SMAD7, BCL6, ID2, AGO2, SNAI1, MDM2, ID3, TCF3, BCOR	306	1480	16792	1.92807	0.0292995	0.00025201	0.000231297
GOTERM_BP_ALL	GO:0045935~positive regulation of nucleobase-containing compound metabolic process	56	16.7164	7.60621e-06	BTG2, SPI1, ELL, CHD7, HMGB1, ETS1, ETS2, IGF1R, ELK3, TRIM28, MYC, MYB, UBTF, JUNB, KLF13, RFC2, MSGN1, TFEB, EBF1, FOS, TNFRSF1A, MSH6, TBL1XR1, IRF1, IL1B, RARA, IRF8, MZF1, HDAC5, AKNA, UHRF1, INSIG1, NLRC5, LRP5, ZFP36L2, AURKB, RXRA, DVL1, POLR2F, HIVEP3, ZNF423, POLR2J, BCL9L, BCL11A, INSR, OSM, HMGA1, ACVR2A, FOSL2, SMAD7, ADGRD1, ID2, AGO2, MAFF, SNAI1, TCF3	306	1658	16792	1.85347	0.0364307	0.000311855	0.000286224
GOTERM_BP_ALL	GO:1902680~positive regulation of RNA biosynthetic process	49	14.6269	7.67112e-06	SPI1, ELL, CHD7, HMGB1, ETS1, ETS2, ELK3, TRIM28, MYC, MYB, UBTF, JUNB, KLF13, MSGN1, TFEB, EBF1, FOS, TNFRSF1A, TBL1XR1, IRF1, IL1B, RARA, IRF8, MZF1, HDAC5, AKNA, UHRF1, INSIG1, NLRC5, LRP5, RXRA, DVL1, POLR2F, HIVEP3, ZNF423, POLR2J, BCL9L, BCL11A, INSR, OSM, HMGA1, ACVR2A, FOSL2, SMAD7, ID2, AGO2, MAFF, SNAI1, TCF3	306	1369	16792	1.96415	0.0367358	0.000311895	0.000286261
GOTERM_BP_ALL	GO:0045934~negative regulation of nucleobase-containing compound metabolic process	49	14.6269	7.79033e-06	BTG2, SPI1, NAB2, ATN1, HMGB1, PHB2, ETS2, ELK3, TRIM28, FGF9, BCL7A, MYC, SCMH1, MYB, TSPO, JUNB, BAHCC1, KLF10, ZHX2, DUSP1, USP3, TFIP11, CBFA2T3, MSH6, TBL1XR1, IRF1, DDIT4, RARA, IRF8, MZF1, HDAC5, PIF1, UHRF1, AEBP1, AURKB, RXRA, CREG1, ZNF423, HEXIM1, BCL11A, HMGA1, SMAD7, BCL6, ID2, SNAI1, MDM2, ID3, TCF3, BCOR	306	1371	16792	1.96128	0.0372959	0.000314124	0.000288307
GOTERM_BP_ALL	GO:0032844~regulation of homeostatic process	24	7.16418	8.80788e-06	CD74, PIF1, SLC27A1, SPI1, KLF13, SYK, CHD7, LRP5, STK39, ETS1, ACVR2A, AURKB, SMAD7, HSH2D, UBASH3B, MYC, IL1B, ID2, UBTF, BCL2, TSPO, PTPN6, CCR5, ADA	306	451	16792	2.92022	0.0420635	0.000351355	0.000322477
GOTERM_BP_ALL	GO:0070665~positive regulation of leukocyte proliferation	13	3.8806	8.85768e-06	SASH3, CD74, SYK, HMGB1, LILRB2, RASAL3, HLA-E, BCL6, IL1B, BCL2, TCF3, ADA, SLAMF1	306	139	16792	5.13227	0.0422963	0.000351355	0.000322477
GOTERM_BP_ALL	GO:0071310~cellular response to organic substance	68	20.2985	9.23045e-06	SCARB1, SLC27A1, SPI1, ITGB2, LDLRAD4, PHB2, IGF1R, HERPUD1, LGALS1, FGF9, MYC, PIM1, FLOT1, TSPO, PMEPA1, CCR5, JUNB, KLF10, SYK, DUSP1, DAPK1, GAB1, AGTRAP, TRAF1, FOS, TGFBR2, HLA-E, TNFRSF1A, KIF16B, IRF1, IL1B, DDIT4, PXDN, RARA, FAM20C, IRF8, ATP6V0D1, TRIB1, RTN4R, CX3CR1, HDAC5, NLRC5, PRKCZ, IQGAP3, ZFP36L2, RXRA, IRAK2, GNG7, POLR2F, UGT3A2, ZNF423, POLR2J, ATP6V1C1, BCL9L, CD74, INSR, …	306	2186	16792	1.70702	0.0440365	0.000363188	0.000333338
GOTERM_BP_ALL	GO:0009890~negative regulation of biosynthetic process	52	15.5224	9.50905e-06	BTG2, SLC27A1, SPI1, NAB2, ATN1, HMGB1, PHB2, ETS2, ELK3, TRIM28, FGF9, BCL7A, MYC, SCMH1, MYB, TSPO, JUNB, BAHCC1, KLF10, ZHX2, DUSP1, DAPK1, USP3, CBFA2T3, TBL1XR1, IRF1, RARA, IRF8, MZF1, TRIB2, HDAC5, PIF1, UHRF1, INSIG1, AEBP1, ZFP36L2, AURKB, RXRA, CREG1, ZNF423, HEXIM1, BCL11A, HMGA1, SMAD7, BCL6, ID2, AGO2, SNAI1, MDM2, ID3, TCF3, BCOR	306	1504	16792	1.8973	0.0453351	0.000371157	0.000340652
GOTERM_BP_ALL	GO:0051172~negative regulation of nitrogen compound metabolic process	52	15.5224	9.86085e-06	BTG2, SPI1, NAB2, ATN1, HMGB1, PHB2, ETS2, ELK3, TRIM28, FGF9, BCL7A, MYC, SCMH1, MYB, TSPO, JUNB, BAHCC1, KLF10, ZHX2, DUSP1, DAPK1, USP3, TFIP11, CBFA2T3, MSH6, TBL1XR1, IRF1, DDIT4, RARA, IRF8, MZF1, HDAC5, PIF1, UHRF1, AEBP1, ZFP36L2, AURKB, RXRA, CREG1, ZNF423, HEXIM1, BCL11A, HMGA1, SMAD7, BCL6, ID2, AGO2, SNAI1, MDM2, ID3, TCF3, BCOR	306	1506	16792	1.89478	0.0469723	0.000381834	0.000350451
GOTERM_BP_ALL	GO:0009891~positive regulation of biosynthetic process	58	17.3134	1.0305e-05	SCARB1, SPI1, ELL, CHD7, ITGB2, HMGB1, ETS1, ETS2, IGF1R, ELK3, TRIM28, MYC, MYB, UBTF, JUNB, KLF13, SYK, RFC2, MSGN1, TFEB, EBF1, FOS, TNFRSF1A, TBL1XR1, IRF1, IL1B, RARA, IRF8, TLR7, MZF1, ABCG1, HDAC5, AKNA, UHRF1, INSIG1, NLRC5, LRP5, AURKB, RXRA, DVL1, POLR2F, HIVEP3, ZNF423, POLR2J, BCL9L, BCL11A, INSR, OSM, HMGA1, ACVR2A, FOSL2, SMAD7, ADGRD1, ID2, AGO2, MAFF, SNAI1, TCF3	306	1760	16792	1.80841	0.0490351	0.000395889	0.000363351

## Sheet: SUPER.EK24
Category	Term	Count	%	PValue	Genes	List Total	Pop Hits	Pop Total	Fold Enrichment	Bonferroni	Benjamini	FDR
GOTERM_BP_ALL	GO:0002376~immune system process	120	34.384	1.65893e-23	SPI1, CSF1, CCL4L2, LST1, RNF19B, PRDM1, ETS1, PHB2, PREX1, CCND3, LGALS1, ALCAM, TRIM28, UBASH3B, FCGRT, MYC, FTH1, SIRPA, VSIG4, JUNB, IL6R, CD93, SLC11A1, PRKCD, TTC7A, HLA-E, BCR, MSH6, ADAM17, DDIT4, CD300E, TRIB1, S100A8, IFNAR1, BLK, CCL3L3, RASAL3, ZFP36L2, ADGRG3, IRAK2, NLRP3, S100A12, MBP, CD14, CD300LF, ZBTB7B, PAG1, CCR1, XBP1, SMAD3, FN1, MSN, SMAD6, BCL6, ID2, TNFSF8, IL7R, ADA, CD…	324	2465	16792	2.52303	8.37097e-20	8.37097e-20	7.63275e-20
GOTERM_BP_ALL	GO:0006955~immune response	84	24.0688	1.74351e-18	CSF1, CCL4L2, LST1, RNF19B, HMGB1, PRDM1, ETS1, PHB2, LYST, LFNG, PSTPIP1, ALCAM, LGALS1, TRIM28, FCGRT, MYC, FTH1, BLNK, FLOT1, VSIG4, IL6R, CTSB, SYK, SLC11A1, TUBB, PRKCD, TFEB, FOS, TNFRSF1B, HLA-E, TNFRSF1A, MSH6, BCR, APBB1IP, HCK, ADAM17, IRF1, IL1B, PXDN, RARA, IRF8, CD300E, TLR7, LCP2, LCP1, S100A8, CD44, IFNAR1, BLK, SASH3, CX3CR1, CCL3L3, NLRC5, PRAM1, LILRA5, CNR2, HLX, IRAK2, S100A12…	324	1551	16792	2.80689	8.79775e-15	4.39887e-15	4.01094e-15
GOTERM_BP_ALL	GO:0045321~leukocyte activation	56	16.0458	4.29716e-18	SPI1, CSF1, LST1, CHD7, HMGB1, PRDM1, LFNG, PREX1, CCND3, LGALS1, BLNK, MYO18A, VSIG4, CD93, SYK, SLC11A1, PRKCD, TGFBR2, HLA-E, MSH6, BCR, APBB1IP, HSH2D, ADAM17, IRF1, IL1B, RARA, MYH9, TLR7, LCP2, LCP1, IFNAR1, SASH3, CX3CR1, HDAC5, RASAL3, PRAM1, ZFP36L2, ADGRG3, CNR2, HLX, S100A12, NLRP3, ZBTB7B, PAG1, XBP1, SMAD3, LILRB2, IGLL5, BCL6, ID2, PTPN6, TNFSF8, LTBR, IL7R, ADA	324	747	16792	3.8853	2.16834e-14	7.22782e-15	6.59041e-15
GOTERM_BP_ALL	GO:0048583~regulation of response to stimulus	138	39.5415	1.49573e-17	ANKLE1, CSF1, CCL4L2, PRDM1, ETS1, PHB2, PREX1, LGALS1, TRIM28, UBASH3B, FCGRT, PLAU, MYC, VSIG4, CHAC1, IL6R, SLC11A1, PRKCD, HLA-E, ARHGAP45, BCR, MSH6, ADAM17, DDIT4, MYADM, CD300E, TRIB1, S100A8, IFNAR1, BLK, CCL3L3, ADRB2, PTTG1IP, RASAL3, IQGAP3, RHOBTB1, SLC9A1, ADGRG3, IRAK2, NACC2, PSAP, NLRP3, S100A12, BMF, CD14, CD300LF, PAG1, BCL9L, HEXIM1, CCR1, XBP1, SMAD3, INSR, FN1, ARHGAP26, SMAD…	324	3636	16792	1.96704	7.54745e-14	1.88686e-14	1.72046e-14
GOTERM_BP_ALL	GO:0048522~positive regulation of cellular process	162	46.4183	6.71842e-17	SCARB1, SLC27A1, SPI1, ANKLE1, CSF1, MAML2, CCL4L2, RNF19B, SMC6, PRDM1, ETS1, PHB2, ELK3, PREX1, CCND3, LGALS1, TRIM28, PLAU, MYC, PIM1, CCNL1, JUNB, IL6R, ACSL1, SLC11A1, PRKCD, HLA-E, BCR, MSH6, ADAM17, STIM2, TBL1XR1, DDIT4, MYADM, S100A6, MZF1, TRIB1, S100A8, IFNAR1, ANAPC2, BLK, AKNA, INSIG1, CCL3L3, SLC1A3, ADRB2, PTTG1IP, RASAL3, IQGAP3, ZFP36L2, SLC9A1, IRAK2, ZMAT3, NACC2, KCNMB1, PSAP,…	324	4744	16792	1.76981	5.60219e-13	6.78023e-14	6.18229e-14
GOTERM_BP_ALL	GO:0048518~positive regulation of biological process	171	48.9971	1.43061e-15	SCARB1, SLC27A1, SPI1, ANKLE1, CSF1, MAML2, CCL4L2, RNF19B, SMC6, PRDM1, ETS1, PHB2, ELK3, PREX1, CCND3, LGALS1, TRIM28, PLAU, MYC, PIM1, VSIG4, CCNL1, JUNB, IL6R, ACSL1, SLC11A1, PRKCD, ARID5B, HLA-E, BCR, MSH6, ADAM17, STIM2, TBL1XR1, DDIT4, MYADM, S100A6, MZF1, TRIB1, S100A8, IFNAR1, ANAPC2, BLK, AKNA, INSIG1, CCL3L3, SLC1A3, ADRB2, PTTG1IP, RASAL3, IQGAP3, ZFP36L2, SLC9A1, IRAK2, ZMAT3, NACC2…	324	5285	16792	1.67691	7.28284e-12	1.20314e-12	1.09704e-12
GOTERM_BP_ALL	GO:0001775~cell activation	58	16.6189	1.81835e-15	SPI1, CSF1, LST1, CHD7, HMGB1, PRDM1, LFNG, PREX1, CCND3, LGALS1, UBASH3B, BLNK, MYO18A, VSIG4, CD93, SYK, SLC11A1, PRKCD, RHOG, TGFBR2, HLA-E, MSH6, BCR, APBB1IP, HSH2D, ADAM17, IRF1, IL1B, RARA, MYH9, TLR7, LCP2, LCP1, IFNAR1, SASH3, CX3CR1, HDAC5, RASAL3, PRAM1, ZFP36L2, ADGRG3, CNR2, HLX, S100A12, NLRP3, ZBTB7B, PAG1, XBP1, SMAD3, LILRB2, IGLL5, BCL6, ID2, PTPN6, TNFSF8, LTBR, IL7R, ADA	324	910	16792	3.30327	8.9635e-12	1.31077e-12	1.19518e-12
GOTERM_BP_ALL	GO:0010646~regulation of cell communication	118	33.8109	3.03353e-15	CSF1, CCL4L2, PRDM1, PHB2, PREX1, LGALS1, UBASH3B, PLAU, MYC, CHAC1, IL6R, PRKCD, ARHGAP45, BCR, ADAM17, DDIT4, MYADM, TRIB1, S100A8, IFNAR1, ANAPC2, BLK, PXK, CCL3L3, SLC1A3, ADRB2, PTTG1IP, RASAL3, IQGAP3, RHOBTB1, SLC9A1, ADGRG3, IRAK2, NACC2, PSAP, NLRP3, S100A12, BMF, CD14, PAG1, BCL9L, HEXIM1, CCR1, XBP1, SMAD3, INSR, FN1, ARHGAP26, SMAD6, ARHGAP25, RCAN1, PTPRE, BCL6, SNAI1, ADA, HIP1, CHD…	324	3020	16792	2.02503	1.51259e-11	1.9134e-12	1.74466e-12
GOTERM_BP_ALL	GO:0023051~regulation of signaling	118	33.8109	1.02963e-14	CSF1, CCL4L2, PRDM1, PHB2, PREX1, LGALS1, UBASH3B, PLAU, MYC, CHAC1, IL6R, PRKCD, ARHGAP45, BCR, ADAM17, DDIT4, MYADM, TRIB1, S100A8, IFNAR1, ANAPC2, BLK, PXK, CCL3L3, SLC1A3, ADRB2, PTTG1IP, RASAL3, IQGAP3, RHOBTB1, SLC9A1, ADGRG3, IRAK2, NACC2, PSAP, NLRP3, S100A12, BMF, CD14, PAG1, BCL9L, HEXIM1, CCR1, XBP1, SMAD3, INSR, FN1, ARHGAP26, SMAD6, ARHGAP25, RCAN1, PTPRE, BCL6, SNAI1, ADA, HIP1, CHD…	324	3070	16792	1.99205	5.21003e-11	5.29421e-12	4.82733e-12
GOTERM_BP_ALL	GO:0007159~leukocyte cell-cell adhesion	41	11.7479	1.04919e-14	SASH3, CHD7, HMGB1, PRDM1, RASAL3, ETS1, ZFP36L2, LFNG, PREX1, CCND3, LGALS1, HLX, NLRP3, ITGB7, VSIG4, ZBTB7B, PAG1, XBP1, SMAD3, SYK, SLC11A1, MSN, LILRB2, TGFBR2, HLA-E, APBB1IP, HSH2D, ADAM17, BCL6, IRF1, IL1B, RARA, MYH9, PTPN6, TNFSF8, LCP1, IL7R, CD44, S100A8, ADA, IFNAR1	324	491	16792	4.32773	5.32208e-11	5.29421e-12	4.82733e-12
GOTERM_BP_ALL	GO:0009966~regulation of signal transduction	109	31.2321	1.49815e-14	CSF1, CCL4L2, PRDM1, PHB2, PREX1, LGALS1, UBASH3B, PLAU, MYC, CHAC1, IL6R, PRKCD, ARHGAP45, BCR, ADAM17, DDIT4, MYADM, TRIB1, S100A8, IFNAR1, CCL3L3, ADRB2, PTTG1IP, RASAL3, IQGAP3, RHOBTB1, SLC9A1, ADGRG3, IRAK2, NACC2, PSAP, NLRP3, S100A12, BMF, CD14, PAG1, BCL9L, HEXIM1, CCR1, XBP1, SMAD3, INSR, FN1, ARHGAP26, SMAD6, ARHGAP25, RCAN1, PTPRE, BCL6, SNAI1, ADA, HIP1, LRRC4, ARHGEF10L, HMGB1, HERP…	324	2728	16792	2.07081	7.56295e-11	6.87243e-12	6.26636e-12
GOTERM_BP_ALL	GO:0002521~leukocyte differentiation	39	11.1748	8.54875e-14	SASH3, HDAC5, SPI1, CSF1, CHD7, HMGB1, PRDM1, ZFP36L2, ADGRG3, LFNG, PREX1, LGALS1, UBASH3B, HLX, MYC, BLNK, NLRP3, ZBTB7B, JUNB, CCR1, KLF10, XBP1, SYK, LILRB2, FOS, TGFBR2, ADAM17, BCL6, ID2, IRF1, RARA, FAM20C, MYH9, PTPN6, TNFSF8, LTBR, TRIB1, IL7R, ADA	324	474	16792	4.26426	4.31368e-10	3.59475e-11	3.27773e-11
GOTERM_BP_ALL	GO:0070486~leukocyte aggregation	38	10.8883	1.11867e-13	SASH3, CHD7, HMGB1, PRDM1, RASAL3, ZFP36L2, LFNG, PREX1, CCND3, LGALS1, HLX, NLRP3, VSIG4, ZBTB7B, PAG1, XBP1, SMAD3, SYK, SLC11A1, LILRB2, TGFBR2, HLA-E, APBB1IP, HSH2D, ADAM17, BCL6, IRF1, IL1B, RARA, MYH9, PTPN6, TNFSF8, LCP1, IL7R, CD44, S100A8, ADA, IFNAR1	324	454	16792	4.33796	5.647e-10	4.34218e-11	3.95925e-11
GOTERM_BP_ALL	GO:0050896~response to stimulus	226	64.7564	1.29837e-13	SPI1, ANKLE1, MAML2, LST1, SMC6, PHB2, ELK3, PREX1, ALCAM, LGALS1, RASSF3, TRIM28, UBASH3B, RASSF4, MYC, FTH1, VSIG4, CHAC1, JUNB, EPHB4, ACSL1, SLC11A1, PRKCD, CACNA2D4, HLA-E, BCR, BIN2, DDIT4, RIN3, ATP6V0D1, TRIB1, PIF1, PTTG1IP, IQGAP3, INPP5A, KCNMB1, S100A12, HIVEP3, CD14, PAG1, ATP6V1C1, CCR1, VASP, HEXIM1, XBP1, BCL11A, INSR, INTS3, FN1, ID2, AGO2, SNAI1, ID3, TNFSF8, RGL1, ADA, CD22, DD…	324	8329	16792	1.40628	6.54895e-10	4.67968e-11	4.26699e-11
GOTERM_BP_ALL	GO:0098602~single organism cell adhesion	50	14.3266	1.95796e-13	CHD7, HMGB1, PRDM1, ETS1, TRIOBP, LFNG, PREX1, CCND3, LGALS1, UBASH3B, FLOT1, ITGB7, VSIG4, CD93, SYK, SLC11A1, PRKCD, C10ORF54, TGFBR2, HLA-E, APBB1IP, HSH2D, ADAM17, IRF1, IL1B, MYADM, RARA, MYH9, LCP1, S100A8, CD44, IFNAR1, SASH3, TTYH1, RASAL3, ZFP36L2, HLX, NLRP3, ZBTB7B, PAG1, XBP1, SMAD3, FN1, MSN, LILRB2, BCL6, PTPN6, TNFSF8, IL7R, ADA	324	779	16792	3.32652	9.88226e-10	6.50058e-11	5.9273e-11
GOTERM_BP_ALL	GO:0046649~lymphocyte activation	45	12.894	2.18008e-13	SASH3, HDAC5, SPI1, LST1, CHD7, HMGB1, PRDM1, RASAL3, ZFP36L2, ADGRG3, LFNG, PREX1, CCND3, LGALS1, HLX, BLNK, NLRP3, VSIG4, ZBTB7B, PAG1, XBP1, SMAD3, SYK, SLC11A1, PRKCD, LILRB2, TGFBR2, HLA-E, MSH6, APBB1IP, IGLL5, HSH2D, ADAM17, BCL6, ID2, IRF1, IL1B, RARA, MYH9, PTPN6, TNFSF8, LCP1, IL7R, ADA, IFNAR1	324	643	16792	3.6271	1.10027e-09	6.50058e-11	5.9273e-11
GOTERM_BP_ALL	GO:0016337~single organismal cell-cell adhesion	48	13.7536	2.19005e-13	SASH3, TTYH1, CHD7, HMGB1, PRDM1, RASAL3, ETS1, ZFP36L2, LFNG, PREX1, CCND3, LGALS1, UBASH3B, HLX, FLOT1, NLRP3, ITGB7, VSIG4, ZBTB7B, PAG1, XBP1, SMAD3, SYK, CD93, SLC11A1, PRKCD, C10ORF54, MSN, LILRB2, TGFBR2, HLA-E, APBB1IP, HSH2D, ADAM17, BCL6, IRF1, IL1B, MYADM, RARA, MYH9, PTPN6, TNFSF8, LCP1, IL7R, CD44, S100A8, ADA, IFNAR1	324	725	16792	3.43132	1.10531e-09	6.50058e-11	5.9273e-11
GOTERM_BP_ALL	GO:0002682~regulation of immune system process	69	19.7708	3.01545e-13	SPI1, SIGLEC9, CSF1, LST1, HMGB1, PRDM1, ETS1, PHB2, LGALS1, UBASH3B, FCGRT, MYC, MYO18A, FLOT1, ITGB7, VSIG4, IL6R, CTSB, KLF10, SYK, SLC11A1, PRKCD, FOS, TGFBR2, HLA-E, MSH6, BCR, HCK, ADAM17, IRF1, IL1B, RARA, CD300E, TLR7, LCP2, TRIB1, IFNAR1, BLK, SASH3, NLRC5, RASAL3, ACVR1B, PRAM1, ZFP36L2, CNR2, HLX, IRAK2, NLRP3, CD14, CD300LF, ZBTB7B, PAG1, LAIR1, CCR1, XBP1, SMAD3, CMTM3, MSN, LILRB2, …	324	1378	16792	2.59512	1.52155e-09	8.45332e-11	7.70784e-11
GOTERM_BP_ALL	GO:0002520~immune system development	50	14.3266	1.38086e-12	SPI1, CSF1, CHD7, HMGB1, PRDM1, ETS1, LFNG, PREX1, LGALS1, UBASH3B, MYC, BLNK, JUNB, KLF10, SYK, GLRX5, TTC7A, FOS, TGFBR2, ETV6, MSH6, ADAM17, IRF1, RARA, FAM20C, MYH9, IRF8, TRIB1, SASH3, HDAC5, LRP5, ACVR1B, ZFP36L2, ADGRG3, HLX, NLRP3, ZBTB7B, SH2B3, CCR1, XBP1, SMAD3, LILRB2, ACVR2A, BCL6, ID2, PTPN6, TNFSF8, LTBR, IL7R, ADA	324	821	16792	3.15634	6.968e-09	3.50801e-10	3.19865e-10
GOTERM_BP_ALL	GO:0070489~T cell aggregation	36	10.3152	1.62991e-12	SASH3, CHD7, HMGB1, PRDM1, RASAL3, ZFP36L2, LFNG, PREX1, CCND3, LGALS1, HLX, NLRP3, VSIG4, ZBTB7B, PAG1, XBP1, SMAD3, SYK, SLC11A1, LILRB2, TGFBR2, HLA-E, APBB1IP, HSH2D, ADAM17, BCL6, IRF1, IL1B, RARA, MYH9, PTPN6, TNFSF8, LCP1, IL7R, ADA, IFNAR1	324	446	16792	4.18336	8.22457e-09	3.50801e-10	3.19865e-10
GOTERM_BP_ALL	GO:0042110~T cell activation	36	10.3152	1.62991e-12	SASH3, CHD7, HMGB1, PRDM1, RASAL3, ZFP36L2, LFNG, PREX1, CCND3, LGALS1, HLX, NLRP3, VSIG4, ZBTB7B, PAG1, XBP1, SMAD3, SYK, SLC11A1, LILRB2, TGFBR2, HLA-E, APBB1IP, HSH2D, ADAM17, BCL6, IRF1, IL1B, RARA, MYH9, PTPN6, TNFSF8, LCP1, IL7R, ADA, IFNAR1	324	446	16792	4.18336	8.22457e-09	3.50801e-10	3.19865e-10
GOTERM_BP_ALL	GO:0006950~response to stress	127	36.3897	1.68524e-12	SCARB1, SLC27A1, ANKLE1, CSF1, CCL4L2, SMC6, PRDM1, ETS1, PHB2, ELK3, LGALS1, TRIM28, UBASH3B, PLAU, MYC, VSIG4, CHAC1, IL6R, SLC11A1, USP3, PRKCD, HLA-E, BCR, MSH6, ADAM17, DDIT4, CD300E, ATP6V0D1, TRIB1, S100A8, IFNAR1, BLK, PIF1, PXK, INSIG1, CCL3L3, SLC1A3, ADRB2, PTTG1IP, ZFP36L2, SLC9A1, IRAK2, ZMAT3, NACC2, KCNMB1, ALDH3B1, PSAP, NLRP3, S100A12, CD14, CCR1, XBP1, SMAD3, INTS3, FN1, HPS4, K…	324	3677	16792	1.79006	8.50356e-09	3.50801e-10	3.19865e-10
GOTERM_BP_ALL	GO:0030097~hemopoiesis	47	13.467	1.6989e-12	SASH3, HDAC5, SPI1, CSF1, CHD7, HMGB1, PRDM1, ACVR1B, ETS1, ZFP36L2, ADGRG3, LFNG, PREX1, LGALS1, UBASH3B, HLX, MYC, BLNK, NLRP3, ZBTB7B, JUNB, SH2B3, CCR1, KLF10, XBP1, SYK, GLRX5, TTC7A, LILRB2, FOS, ACVR2A, ETV6, TGFBR2, ADAM17, BCL6, ID2, IRF1, RARA, IRF8, FAM20C, MYH9, PTPN6, TNFSF8, LTBR, TRIB1, IL7R, ADA	324	739	16792	3.29618	8.57246e-09	3.50801e-10	3.19865e-10
GOTERM_BP_ALL	GO:0071593~lymphocyte aggregation	36	10.3152	1.72831e-12	SASH3, CHD7, HMGB1, PRDM1, RASAL3, ZFP36L2, LFNG, PREX1, CCND3, LGALS1, HLX, NLRP3, VSIG4, ZBTB7B, PAG1, XBP1, SMAD3, SYK, SLC11A1, LILRB2, TGFBR2, HLA-E, APBB1IP, HSH2D, ADAM17, BCL6, IRF1, IL1B, RARA, MYH9, PTPN6, TNFSF8, LCP1, IL7R, ADA, IFNAR1	324	447	16792	4.174	8.72092e-09	3.50801e-10	3.19865e-10
GOTERM_BP_ALL	GO:0023052~signaling	183	52.4355	1.73802e-12	SCARB1, SLC27A1, CSF1, MAML2, CCL4L2, PRDM1, PHB2, ELK3, PREX1, CCND3, LGALS1, ALCAM, TRIM28, RASSF3, UBASH3B, FCGRT, PLAU, RASSF4, MYC, PIM1, CHAC1, IL6R, EPHB4, ACSL1, PRKCD, ARID5B, CACNA2D4, HLA-E, ARHGAP45, BCR, MSH6, ADAM17, TBL1XR1, DDIT4, MYADM, S100A6, RIN3, ATP6V0D1, TRIB1, S100A8, IFNAR1, ANAPC2, BLK, PXK, INSIG1, CCL3L3, SLC1A3, ADRB2, PTTG1IP, RASAL3, IQGAP3, RHOBTB1, ZFP36L2, SLC9A1…	324	6260	16792	1.51508	8.77022e-09	3.50801e-10	3.19865e-10
GOTERM_BP_ALL	GO:0048534~hematopoietic or lymphoid organ development	48	13.7536	2.73007e-12	SASH3, HDAC5, SPI1, CSF1, CHD7, LRP5, HMGB1, PRDM1, ACVR1B, ETS1, ZFP36L2, ADGRG3, LFNG, PREX1, LGALS1, UBASH3B, HLX, MYC, BLNK, NLRP3, ZBTB7B, JUNB, SH2B3, CCR1, KLF10, XBP1, SYK, GLRX5, TTC7A, LILRB2, FOS, ACVR2A, ETV6, TGFBR2, ADAM17, BCL6, ID2, IRF1, RARA, IRF8, FAM20C, MYH9, PTPN6, TNFSF8, LTBR, TRIB1, IL7R, ADA	324	778	16792	3.19756	1.37758e-08	5.29843e-10	4.83117e-10
GOTERM_BP_ALL	GO:0044700~single organism signaling	181	51.8625	3.62469e-12	SCARB1, SLC27A1, CSF1, MAML2, CCL4L2, PRDM1, PHB2, ELK3, PREX1, CCND3, LGALS1, ALCAM, TRIM28, RASSF3, UBASH3B, FCGRT, PLAU, RASSF4, MYC, PIM1, CHAC1, IL6R, EPHB4, ACSL1, PRKCD, ARID5B, CACNA2D4, HLA-E, ARHGAP45, BCR, MSH6, ADAM17, TBL1XR1, DDIT4, MYADM, S100A6, RIN3, ATP6V0D1, TRIB1, S100A8, IFNAR1, ANAPC2, BLK, INSIG1, CCL3L3, SLC1A3, ADRB2, PTTG1IP, RASAL3, IQGAP3, RHOBTB1, ZFP36L2, SLC9A1, ADG…	324	6207	16792	1.51131	1.829e-08	6.77414e-10	6.17674e-10
GOTERM_BP_ALL	GO:0007165~signal transduction	172	49.2837	4.02077e-12	SCARB1, SLC27A1, CSF1, MAML2, CCL4L2, PRDM1, PHB2, ELK3, PREX1, CCND3, LGALS1, ALCAM, TRIM28, RASSF3, UBASH3B, FCGRT, PLAU, RASSF4, MYC, PIM1, CHAC1, IL6R, EPHB4, ACSL1, PRKCD, ARID5B, HLA-E, ARHGAP45, BCR, MSH6, ADAM17, TBL1XR1, DDIT4, MYADM, S100A6, RIN3, ATP6V0D1, TRIB1, S100A8, IFNAR1, BLK, INSIG1, CCL3L3, ADRB2, PTTG1IP, RASAL3, IQGAP3, RHOBTB1, ZFP36L2, SLC9A1, ADGRG3, INPP5A, IRAK2, ZMAT3,…	324	5775	16792	1.5436	2.02889e-08	7.24601e-10	6.60699e-10
GOTERM_BP_ALL	GO:0007154~cell communication	182	52.149	4.8854e-12	SCARB1, SLC27A1, CSF1, MAML2, CCL4L2, PRDM1, PHB2, ELK3, PREX1, CCND3, LGALS1, ALCAM, TRIM28, RASSF3, UBASH3B, FCGRT, PLAU, RASSF4, MYC, PIM1, CHAC1, IL6R, EPHB4, ACSL1, PRKCD, ARID5B, HLA-E, ARHGAP45, BCR, MSH6, ADAM17, TBL1XR1, DDIT4, MYADM, S100A6, RIN3, ATP6V0D1, TRIB1, S100A8, IFNAR1, ANAPC2, BLK, PXK, INSIG1, CCL3L3, SLC1A3, ADRB2, PTTG1IP, RASAL3, IQGAP3, RHOBTB1, ZFP36L2, SLC9A1, ADGRG3, …	324	6275	16792	1.50319	2.46519e-08	8.5006e-10	7.75095e-10
GOTERM_BP_ALL	GO:1903708~positive regulation of hemopoiesis	22	6.30372	5.96238e-12	SASH3, CCR1, KLF10, XBP1, SYK, CSF1, HMGB1, LILRB2, FOS, PRDM1, ACVR1B, ETS1, ACVR2A, TGFBR2, LGALS1, HLX, ID2, RARA, NLRP3, TRIB1, IL7R, ADA	324	163	16792	6.99508	3.0086e-08	1.00287e-09	9.1443e-10
GOTERM_BP_ALL	GO:1903706~regulation of hemopoiesis	30	8.59599	8.20911e-12	SASH3, SPI1, CSF1, HMGB1, PRDM1, ACVR1B, ETS1, ZFP36L2, LGALS1, UBASH3B, HLX, MYC, NLRP3, ZBTB7B, CCR1, KLF10, XBP1, SYK, LILRB2, FOS, ACVR2A, TGFBR2, BCL6, ID2, IRF1, RARA, PTPN6, TRIB1, IL7R, ADA	324	328	16792	4.74029	4.14231e-08	1.33623e-09	1.21839e-09
GOTERM_BP_ALL	GO:1902105~regulation of leukocyte differentiation	26	7.44986	9.83034e-12	SASH3, CSF1, HMGB1, PRDM1, ZFP36L2, LGALS1, UBASH3B, HLX, MYC, NLRP3, ZBTB7B, CCR1, KLF10, XBP1, SYK, LILRB2, FOS, TGFBR2, BCL6, ID2, IRF1, RARA, PTPN6, TRIB1, IL7R, ADA	324	244	16792	5.52257	4.9604e-08	1.55012e-09	1.41342e-09
GOTERM_BP_ALL	GO:0051716~cellular response to stimulus	194	55.5874	1.0694e-11	SPI1, ANKLE1, MAML2, SMC6, PHB2, ELK3, PREX1, ALCAM, LGALS1, RASSF3, TRIM28, UBASH3B, RASSF4, MYC, CHAC1, JUNB, EPHB4, ACSL1, PRKCD, HLA-E, BCR, BIN2, DDIT4, RIN3, ATP6V0D1, TRIB1, PIF1, PTTG1IP, IQGAP3, INPP5A, KCNMB1, S100A12, HIVEP3, CD14, PAG1, ATP6V1C1, CCR1, HEXIM1, XBP1, BCL11A, INSR, INTS3, FN1, ID2, AGO2, SNAI1, ID3, TNFSF8, RGL1, ADA, DDR1, BTG2, HIP1, SIGLEC9, LRRC4, RCSD1, LYST, HERPU…	324	6927	16792	1.45149	5.39619e-08	1.63522e-09	1.49101e-09
GOTERM_BP_ALL	GO:0022610~biological adhesion	75	21.49	1.22004e-11	DDR1, SCARB1, SIGLEC9, CSF1, CHD7, HMGB1, PRDM1, ETS1, TRIOBP, LFNG, PREX1, CCND3, PSTPIP1, ALCAM, LGALS1, UBASH3B, PLAU, FLOT1, SIRPA, ITGB7, VSIG4, EPHB4, EGFL7, CD93, SYK, SLC11A1, PRKCD, C10ORF54, TGFBR2, HLA-E, APBB1IP, HCK, HSH2D, ADAM17, IRF1, IL1B, CDH11, MYADM, RARA, MYH9, LCP1, S100A8, CD44, DBN1, PLEC, IFNAR1, SASH3, CX3CR1, TTYH1, ASAP1, RASAL3, ZFP36L2, SLC9A1, HLX, NLRP3, ZBTB7B, PA…	324	1705	16792	2.27979	6.1563e-08	1.81068e-09	1.651e-09
GOTERM_BP_ALL	GO:0007155~cell adhesion	74	21.2034	2.81219e-11	DDR1, SIGLEC9, CSF1, CHD7, HMGB1, PRDM1, ETS1, TRIOBP, LFNG, PREX1, CCND3, PSTPIP1, ALCAM, LGALS1, UBASH3B, PLAU, FLOT1, SIRPA, ITGB7, VSIG4, EPHB4, EGFL7, CD93, SYK, SLC11A1, PRKCD, C10ORF54, TGFBR2, HLA-E, APBB1IP, HCK, HSH2D, ADAM17, IRF1, IL1B, CDH11, MYADM, RARA, MYH9, LCP1, S100A8, CD44, DBN1, PLEC, IFNAR1, SASH3, CX3CR1, TTYH1, ASAP1, RASAL3, ZFP36L2, SLC9A1, HLX, NLRP3, ZBTB7B, PAG1, CCR1…	324	1699	16792	2.25733	1.41903e-07	4.05438e-09	3.69683e-09
GOTERM_BP_ALL	GO:0065009~regulation of molecular function	104	29.7994	3.39876e-11	SCARB1, SLC27A1, CSF1, CCL4L2, PHB2, RCBTB2, PREX1, CCND3, TRIM28, UBASH3B, PLAU, MYC, PIM1, CCNL1, IL6R, ACSL1, SLC11A1, PRKCD, ARID5B, ARHGAP45, BCR, MSH6, ADAM17, STIM2, TBC1D24, RIN3, TRIB1, S100A8, ANAPC2, PIF1, PXK, CCL3L3, ADRB2, RASAL3, IQGAP3, SLC9A1, ADGRG3, IRAK2, PSAP, NLRP3, S100A12, HEXIM1, SMAD3, INSR, FN1, HPS4, TBCD, KIAA0430, ARHGAP26, ARHGAP25, RCAN1, BCL6, ID2, ID3, RGL1, HIP1…	324	2863	16792	1.88265	1.71501e-07	4.76393e-09	4.34381e-09
GOTERM_BP_ALL	GO:0030098~lymphocyte differentiation	28	8.02292	6.26422e-11	SASH3, HDAC5, SPI1, CHD7, HMGB1, PRDM1, ZFP36L2, ADGRG3, LFNG, PREX1, LGALS1, HLX, BLNK, NLRP3, ZBTB7B, XBP1, SYK, LILRB2, TGFBR2, ADAM17, BCL6, ID2, IRF1, RARA, PTPN6, TNFSF8, IL7R, ADA	324	310	16792	4.68116	3.16093e-07	8.54304e-09	7.78964e-09
GOTERM_BP_ALL	GO:1902107~positive regulation of leukocyte differentiation	19	5.44413	6.73536e-11	SASH3, CCR1, KLF10, XBP1, SYK, CSF1, HMGB1, LILRB2, FOS, PRDM1, TGFBR2, LGALS1, HLX, ID2, RARA, NLRP3, TRIB1, IL7R, ADA	324	131	16792	7.51692	3.39867e-07	8.9005e-09	8.11557e-09
GOTERM_BP_ALL	GO:0010604~positive regulation of macromolecule metabolic process	103	29.5129	6.8791e-11	SLC27A1, SPI1, CSF1, MAML2, CCL4L2, RNF19B, PRDM1, ETS1, PHB2, ELK3, CCND3, TRIM28, MYC, PIM1, CCNL1, JUNB, IL6R, ACSL1, SLC11A1, PRKCD, MSH6, ADAM17, TBL1XR1, MZF1, TRIB1, S100A8, IFNAR1, ANAPC2, AKNA, INSIG1, CCL3L3, ADRB2, PTTG1IP, IQGAP3, ZFP36L2, SLC9A1, IRAK2, PSAP, NLRP3, S100A12, HIVEP3, ZBTB7B, BCL9L, CCR1, XBP1, SMAD3, BCL11A, INSR, FN1, MSN, SMAD6, FOSL2, BCL6, ID2, AGO2, SNAI1, TNFSF8…	324	2856	16792	1.86912	3.47119e-07	8.9005e-09	8.11557e-09
GOTERM_BP_ALL	GO:0031325~positive regulation of cellular metabolic process	102	29.2264	1.12475e-10	SCARB1, SLC27A1, SPI1, CSF1, MAML2, CCL4L2, RNF19B, ETS1, PHB2, ELK3, CCND3, TRIM28, MYC, PIM1, CCNL1, JUNB, IL6R, ACSL1, SLC11A1, PRKCD, MSH6, ADAM17, TBL1XR1, MZF1, TRIB1, S100A8, IFNAR1, ANAPC2, AKNA, INSIG1, CCL3L3, ADRB2, PTTG1IP, IQGAP3, ZFP36L2, SLC9A1, IRAK2, PSAP, NLRP3, S100A12, HIVEP3, BCL9L, CCR1, XBP1, SMAD3, BCL11A, INSR, FN1, MSN, SMAD6, FOSL2, BCL6, ID2, AGO2, SNAI1, TNFSF8, FBXL5…	324	2839	16792	1.86205	5.67548e-07	1.41887e-08	1.29374e-08
GOTERM_BP_ALL	GO:0006954~inflammatory response	40	11.4613	1.61162e-10	CX3CR1, HDAC5, PXK, CSF1, CCL4L2, CCL3L3, HMGB1, ETS1, PHB2, PSTPIP1, CNR2, IRAK2, NFKBIZ, BLNK, S100A12, NLRP3, CD14, IL6R, CCR1, SMAD3, SYK, SLC11A1, PRKCD, OSM, FN1, FOS, TNFRSF1B, TNFRSF1A, BCR, HCK, NLRP12, THEMIS2, BCL6, IL1B, ALOX5AP, TLR7, PTX3, LTBR, S100A8, ADA	324	637	16792	3.25445	8.13225e-07	1.98348e-08	1.80856e-08
GOTERM_BP_ALL	GO:0016477~cell migration	57	16.3324	2.82784e-10	DDR1, SCARB1, CSF1, CCL4L2, HMGB1, ETS1, LYST, PREX1, PSTPIP1, PLAU, MYC, MYO18A, SIRPA, ITGB7, IL6R, EPHB4, CAP1, SYK, PRKCD, RHOG, ARID5B, TGFBR2, BCR, SLC7A5, HCK, ADAM17, BIN2, IL1B, DDIT4, MYADM, MYH9, LCP1, TRIB1, S100A8, CD44, SDCCAG8, CX3CR1, HDAC5, LRP1, CCL3L3, LRP5, RETN, ACVR1B, SLC9A1, CNR2, S100A12, CCR1, XBP1, SMAD3, INSR, FN1, MSN, NLRP12, FMNL1, SNAI1, PTPN6, ADA	324	1184	16792	2.49506	1.42692e-06	3.39744e-08	3.09783e-08
GOTERM_BP_ALL	GO:0009893~positive regulation of metabolic process	106	30.3725	2.91163e-10	SCARB1, SLC27A1, SPI1, CSF1, MAML2, CCL4L2, RNF19B, PRDM1, ETS1, PHB2, ELK3, CCND3, TRIM28, MYC, PIM1, CCNL1, JUNB, IL6R, ACSL1, SLC11A1, PRKCD, MSH6, ADAM17, TBL1XR1, MZF1, TRIB1, S100A8, IFNAR1, ANAPC2, AKNA, INSIG1, CCL3L3, ADRB2, PTTG1IP, IQGAP3, ZFP36L2, SLC9A1, IRAK2, PSAP, NLRP3, S100A12, HIVEP3, ZBTB7B, BCL9L, CCR1, XBP1, SMAD3, BCL11A, INSR, FN1, MSN, SMAD6, FOSL2, BCL6, ID2, AGO2, SNAI1…	324	3052	16792	1.80003	1.46921e-06	3.41676e-08	3.11544e-08
GOTERM_BP_ALL	GO:0006952~defense response	66	18.9112	5.21146e-10	CSF1, CCL4L2, HMGB1, PRDM1, ETS1, PHB2, LYST, PSTPIP1, TRIM28, MYC, NFKBIZ, BLNK, FLOT1, VSIG4, IL6R, CTSB, SYK, SLC11A1, TUBB, PRKCD, FOS, TNFRSF1B, HLA-E, TNFRSF1A, BCR, HCK, ADAM17, IRF1, IL1B, DDIT4, IRF8, CD300E, TLR7, S100A8, CD44, IFNAR1, BLK, CX3CR1, HDAC5, PXK, CCL3L3, NLRC5, LILRA5, CNR2, IRAK2, S100A12, NLRP3, CD14, CCR1, SMAD3, OSM, FN1, LILRB2, TUBB4B, IGLL5, NLRP12, THEMIS2, BCL6, A…	324	1518	16792	2.25335	2.6297e-06	5.9766e-08	5.44953e-08
GOTERM_BP_ALL	GO:0030154~cell differentiation	119	34.0974	6.72466e-10	SPI1, CSF1, LST1, NAB2, MSI2, PRDM1, ETS1, ELK3, PREX1, LGALS1, ALCAM, TRIM28, UBASH3B, MYC, FAM65B, CHAC1, RPS11, JUNB, IL6R, ARID5B, ADAM17, TBL1XR1, DDIT4, MYADM, TBC1D24, S100A6, TRIB1, S100A8, ANAPC2, BLK, INSIG1, SLC1A3, ADRB2, ZFP36L2, SLC9A1, ADGRG3, PSAP, NLRP3, HIVEP3, ZBTB7B, BCL9L, CCR1, VASP, TMEM120B, XBP1, SMAD3, BCL11A, FBXO38, FN1, HPS4, MSN, KIAA0430, SMAD6, FOSL2, RCAN1, BCL6, …	324	3652	16792	1.68878	3.39326e-06	7.54058e-08	6.87559e-08
GOTERM_BP_ALL	GO:0030155~regulation of cell adhesion	39	11.1748	7.71029e-10	DDR1, SASH3, CSF1, HMGB1, PRDM1, RASAL3, ETS1, TRIOBP, SLC9A1, PREX1, LGALS1, UBASH3B, HLX, PLAU, FLOT1, NLRP3, VSIG4, ZBTB7B, PAG1, CYTH1, XBP1, SMAD3, SYK, PRKCD, FN1, TBCD, LILRB2, TGFBR2, HLA-E, APBB1IP, BCL6, IRF1, IL1B, MYADM, RARA, PTPN6, IL7R, CD44, ADA	324	643	16792	3.14348	3.89061e-06	8.45786e-08	7.71197e-08
GOTERM_BP_ALL	GO:0046634~regulation of alpha-beta T cell activation	14	4.01146	9.92759e-10	SASH3, SYK, HMGB1, PRDM1, RASAL3, TGFBR2, HLA-E, BCL6, HLX, IRF1, RARA, NLRP3, ZBTB7B, ADA	324	72	16792	10.0775	5.00945e-06	1.04859e-07	9.56112e-08
GOTERM_BP_ALL	GO:0048870~cell motility	60	17.192	1.01825e-09	DDR1, SCARB1, CSF1, CCL4L2, HMGB1, ETS1, LYST, PREX1, PSTPIP1, PLAU, MYC, MYO18A, SIRPA, ITGB7, IL6R, EPHB4, CAP1, SYK, PRKCD, RHOG, GAB1, ARID5B, TGFBR2, BCR, SLC7A5, HCK, ADAM17, BIN2, IL1B, DDIT4, MYADM, MYH9, LCP1, TRIB1, S100A8, CD44, SDCCAG8, CX3CR1, HDAC5, LRP1, CCL3L3, LRP5, RETN, ACVR1B, SLC9A1, ADGRG3, PARD6B, CNR2, S100A12, CCR1, XBP1, SMAD3, INSR, FN1, MSN, NLRP12, FMNL1, SNAI1, PTPN6…	324	1330	16792	2.33807	5.13806e-06	1.04859e-07	9.56112e-08
GOTERM_BP_ALL	GO:0051674~localization of cell	60	17.192	1.01825e-09	DDR1, SCARB1, CSF1, CCL4L2, HMGB1, ETS1, LYST, PREX1, PSTPIP1, PLAU, MYC, MYO18A, SIRPA, ITGB7, IL6R, EPHB4, CAP1, SYK, PRKCD, RHOG, GAB1, ARID5B, TGFBR2, BCR, SLC7A5, HCK, ADAM17, BIN2, IL1B, DDIT4, MYADM, MYH9, LCP1, TRIB1, S100A8, CD44, SDCCAG8, CX3CR1, HDAC5, LRP1, CCL3L3, LRP5, RETN, ACVR1B, SLC9A1, ADGRG3, PARD6B, CNR2, S100A12, CCR1, XBP1, SMAD3, INSR, FN1, MSN, NLRP12, FMNL1, SNAI1, PTPN6…	324	1330	16792	2.33807	5.13806e-06	1.04859e-07	9.56112e-08
GOTERM_BP_ALL	GO:0002684~positive regulation of immune system process	49	14.0401	1.07183e-09	CSF1, HMGB1, PRDM1, ETS1, LGALS1, MYO18A, FLOT1, VSIG4, IL6R, CTSB, KLF10, SYK, SLC11A1, PRKCD, FOS, TGFBR2, HLA-E, MSH6, HCK, ADAM17, IRF1, IL1B, RARA, TLR7, LCP2, TRIB1, BLK, SASH3, NLRC5, RASAL3, ACVR1B, HLX, IRAK2, NLRP3, CD14, PAG1, CCR1, XBP1, CMTM3, LILRB2, ACVR2A, IGLL5, THEMIS2, BCL6, ID2, PTPN6, PIK3AP1, IL7R, ADA	324	960	16792	2.64534	5.40842e-06	1.08169e-07	9.86294e-08
GOTERM_BP_ALL	GO:0098609~cell-cell adhesion	55	15.7593	1.24667e-09	CHD7, HMGB1, PRDM1, ETS1, LFNG, PREX1, CCND3, ALCAM, LGALS1, UBASH3B, FLOT1, ITGB7, VSIG4, CD93, SYK, SLC11A1, PRKCD, C10ORF54, TGFBR2, HLA-E, APBB1IP, HSH2D, ADAM17, IRF1, IL1B, CDH11, MYADM, RARA, MYH9, LCP1, S100A8, CD44, DBN1, PLEC, IFNAR1, SASH3, TTYH1, ASAP1, RASAL3, ZFP36L2, HLX, NLRP3, ZBTB7B, PAG1, VASP, XBP1, SMAD3, MSN, LILRB2, FMNL2, BCL6, PTPN6, TNFSF8, IL7R, ADA	324	1164	16792	2.44888	6.29069e-06	1.23347e-07	1.1247e-07
GOTERM_BP_ALL	GO:0045619~regulation of lymphocyte differentiation	18	5.15759	1.63147e-09	SASH3, XBP1, SYK, HMGB1, LILRB2, PRDM1, ZFP36L2, TGFBR2, BCL6, HLX, ID2, IRF1, RARA, NLRP3, PTPN6, ZBTB7B, IL7R, ADA	324	140	16792	6.66349	8.23237e-06	1.58316e-07	1.44354e-07
GOTERM_BP_ALL	GO:0040011~locomotion	65	18.6246	1.87478e-09	DDR1, SCARB1, CSF1, CCL4L2, HMGB1, ETS1, LYST, PREX1, PSTPIP1, ALCAM, PLAU, MYC, MYO18A, SIRPA, ITGB7, IL6R, EPHB4, CAP1, SYK, PRKCD, RHOG, GAB1, ARID5B, TGFBR2, ENAH, BCR, SLC7A5, HCK, ADAM17, BIN2, IL1B, DDIT4, MYADM, MYH9, LCP1, TRIB1, S100A8, CD44, SDCCAG8, CX3CR1, HDAC5, LRP1, CCL3L3, LRP5, RETN, ACVR1B, SLC9A1, ADGRG3, PARD6B, CNR2, S100A12, CCR1, VASP, XBP1, SMAD3, CMTM3, INSR, FN1, MSN, N…	324	1530	16792	2.20181	9.4601e-06	1.78493e-07	1.62752e-07
GOTERM_BP_ALL	GO:0048869~cellular developmental process	125	35.8166	2.39581e-09	SPI1, CSF1, LST1, NAB2, SMC6, MSI2, PRDM1, ETS1, ELK3, PREX1, LGALS1, ALCAM, TRIM28, UBASH3B, MYC, FAM65B, CHAC1, RPS11, JUNB, IL6R, PRKCD, ARID5B, ADAM17, TBL1XR1, DDIT4, MYADM, TBC1D24, S100A6, ATP6V0D1, TRIB1, S100A8, ANAPC2, BLK, INSIG1, SLC1A3, ADRB2, ZFP36L2, SLC9A1, ADGRG3, PSAP, NLRP3, HIVEP3, ZBTB7B, BCL9L, CCR1, VASP, TMEM120B, XBP1, SMAD3, BCL11A, FBXO38, FN1, HPS4, MSN, KIAA0430, SMAD…	324	3992	16792	1.62284	1.20892e-05	2.23875e-07	2.04132e-07
GOTERM_BP_ALL	GO:0030217~T cell differentiation	21	6.01719	2.6645e-09	SASH3, XBP1, SYK, CHD7, HMGB1, LILRB2, PRDM1, ZFP36L2, TGFBR2, LFNG, PREX1, ADAM17, BCL6, HLX, IRF1, RARA, NLRP3, TNFSF8, ZBTB7B, IL7R, ADA	324	204	16792	5.33515	1.3445e-05	2.44456e-07	2.22897e-07
GOTERM_BP_ALL	GO:0050865~regulation of cell activation	33	9.45559	2.87759e-09	SASH3, LST1, HMGB1, PRDM1, RASAL3, PRAM1, ZFP36L2, LGALS1, UBASH3B, CNR2, HLX, MYO18A, NLRP3, VSIG4, ZBTB7B, PAG1, XBP1, SYK, PRKCD, LILRB2, TGFBR2, HLA-E, MSH6, BCR, IGLL5, BCL6, ID2, IRF1, IL1B, RARA, PTPN6, IL7R, ADA	324	501	16792	3.41377	1.45202e-05	2.59292e-07	2.36425e-07
GOTERM_BP_ALL	GO:0032502~developmental process	160	45.8453	3.05258e-09	SPI1, CSF1, LST1, NAB2, ATN1, SMC6, MSI2, PRDM1, ETS1, PHB2, ELK3, PREX1, LGALS1, ALCAM, TRIM28, UBASH3B, MYC, PIM1, FAM65B, CHAC1, JUNB, IL6R, EPHB4, PRKCD, ARID5B, TTC7A, BCR, MSH6, ADAM17, TBL1XR1, DDIT4, MYADM, TBC1D24, S100A6, ATP6V0D1, TRIB1, S100A8, ANAPC2, INSIG1, SLC1A3, ADRB2, IQGAP3, ZFP36L2, SLC9A1, ADGRG3, KCNMB1, PSAP, NLRP3, MBP, HIVEP3, ZBTB7B, BCL9L, HEXIM1, CCR1, VASP, XBP1, SMA…	324	5632	16792	1.47236	1.54032e-05	2.70234e-07	2.46402e-07
GOTERM_BP_ALL	GO:0048519~negative regulation of biological process	138	39.5415	4.57515e-09	SLC27A1, SPI1, LST1, NAB2, ATN1, PRDM1, ETS1, PHB2, ELK3, LGALS1, TRIM28, UBASH3B, PLAU, MYC, FTH1, PIM1, VSIG4, CHAC1, JUNB, IL6R, BAHCC1, SFMBT2, SLC11A1, USP3, PRKCD, ARID5B, HLA-E, BCR, MSH6, ADAM17, TBL1XR1, DDIT4, MYADM, MZF1, TRIB1, ANAPC2, BLK, PIF1, PXK, INSIG1, CCL3L3, ADRB2, PTTG1IP, RASAL3, IQGAP3, ZFP36L2, SLC9A1, ADGRG3, IRAK2, NACC2, PSAP, NLRP3, CD14, PAG1, BCL9L, HEXIM1, CCR1, XB…	324	4623	16792	1.54708	2.3086e-05	3.96023e-07	3.61098e-07
GOTERM_BP_ALL	GO:0032496~response to lipopolysaccharide	25	7.16332	4.70195e-09	CX3CR1, HDAC5, SCARB1, PRDM1, CNR2, IRAK2, NLRP3, CD14, JUNB, XBP1, SLC11A1, LILRB2, FOS, TNFRSF1B, TNFRSF1A, BCR, HCK, ADAM17, IL1B, RARA, IRF8, LTBR, TRIB1, S100A8, IFNAR1	324	302	16792	4.29033	2.37258e-05	3.96023e-07	3.61098e-07
GOTERM_BP_ALL	GO:1902531~regulation of intracellular signal transduction	69	19.7708	4.70895e-09	HIP1, CSF1, CCL4L2, LRRC4, ARHGEF10L, HMGB1, PHB2, HERPUD1, PREX1, SPRED1, LGALS1, MYC, PSD4, TAGAP, FLOT1, IL6R, SYK, DUSP1, RFC2, PRKCD, RHOG, GAB1, PPP2R5C, TNFRSF1B, DUSP6, TNFRSF1A, ARHGAP45, BCR, IL1B, DDIT4, MYADM, TLR7, TRIB1, S100A8, CD44, CCL3L3, ADRB2, PTTG1IP, RASAL3, IQGAP3, RHOBTB1, AURKB, SLC9A1, ADGRG3, IRAK2, NACC2, PSAP, S100A12, NLRP3, BMF, CYTH1, CCR1, HEXIM1, XBP1, INSR, OSM,…	324	1714	16792	2.08639	2.37611e-05	3.96023e-07	3.61098e-07
GOTERM_BP_ALL	GO:0044093~positive regulation of molecular function	72	20.6304	6.28506e-09	SCARB1, SLC27A1, HIP1, CSF1, CCL4L2, ARHGEF10L, HMGB1, PHB2, RCBTB2, HERPUD1, LFNG, PREX1, CCND3, TRIM28, MYC, PSD4, TAGAP, PIM1, FLOT1, CCNL1, IL6R, CAP1, SYK, ACSL1, RFC2, SLC11A1, PRKCD, RHOG, GAB1, ARID5B, DUSP6, TGFBR2, ARHGAP45, MSH6, BCR, ADAM17, STIM2, IL1B, RARA, TBC1D24, RIN3, LCP2, S100A8, CD44, ANAPC2, HDAC5, CCL3L3, LRP5, GLRX, DENND3, ASAP1, ADRB2, RASAL3, IQGAP3, AURKB, SLC9A1, IRA…	324	1840	16792	2.02802	3.17139e-05	5.19909e-07	4.74059e-07
GOTERM_BP_ALL	GO:0050790~regulation of catalytic activity	85	24.3553	7.39295e-09	SCARB1, SLC27A1, HIP1, CSF1, ELL, CCL4L2, LRRC4, ARHGEF10L, HMGB1, RCBTB2, HERPUD1, PREX1, CCND3, SPRED1, UBASH3B, MYC, PSD4, TAGAP, PIM1, CCNL1, IL6R, CTSB, CAP1, SYK, ACSL1, DUSP1, RFC2, SLC11A1, PRKCD, RHOG, GAB1, TFIP11, PPP2R5C, DUSP6, TGFBR2, ARHGAP45, MSH6, BCR, ADAM17, IL1B, TMBIM1, TBC1D24, RIN3, LCP2, TRIB1, S100A8, CD44, ANAPC2, PIF1, PXK, LRP1, CCL3L3, NLRC5, LRP5, DENND3, ASAP1, ADRB…	324	2357	16792	1.86903	3.73041e-05	6.01691e-07	5.48628e-07
GOTERM_BP_ALL	GO:0022407~regulation of cell-cell adhesion	28	8.02292	7.89166e-09	SASH3, HMGB1, PRDM1, RASAL3, ETS1, LGALS1, UBASH3B, HLX, FLOT1, NLRP3, VSIG4, ZBTB7B, PAG1, XBP1, SYK, PRKCD, LILRB2, TGFBR2, HLA-E, BCL6, IRF1, IL1B, MYADM, RARA, PTPN6, IL7R, CD44, ADA	324	386	16792	3.75948	3.98205e-05	6.32084e-07	5.76342e-07
GOTERM_BP_ALL	GO:0048585~negative regulation of response to stimulus	59	16.9054	8.03991e-09	LRRC4, PRDM1, ETS1, PHB2, HERPUD1, LFNG, SPRED1, UBASH3B, PLAU, MYC, PMEPA1, CHAC1, EGFL7, DUSP1, PRKCD, TFIP11, TNFRSF1B, DUSP6, TGFBR2, HLA-E, TNFRSF1A, BCR, ADAM17, IL1B, DDIT4, PXDN, TMBIM1, MYADM, TRIB1, CD44, CX3CR1, LRP1, NXN, NLRC5, ADRB2, PTTG1IP, RASAL3, ADGRG3, ZNRF3, CNR2, HLX, PSAP, NLRP3, CD14, BCL9L, XBP1, SMAD3, LILRB2, SMAD6, PTPRE, NLRP12, BCL6, SNAI1, PDCD4, PTPN6, TRIM38, PIK3…	324	1369	16792	2.2336	4.05685e-05	6.33896e-07	5.77994e-07
GOTERM_BP_ALL	GO:0002694~regulation of leukocyte activation	31	8.88252	8.51753e-09	SASH3, LST1, HMGB1, PRDM1, RASAL3, PRAM1, ZFP36L2, LGALS1, CNR2, HLX, MYO18A, NLRP3, VSIG4, ZBTB7B, PAG1, XBP1, SYK, LILRB2, TGFBR2, HLA-E, MSH6, BCR, IGLL5, BCL6, ID2, IRF1, IL1B, RARA, PTPN6, IL7R, ADA	324	468	16792	3.433	4.29786e-05	6.61223e-07	6.0291e-07
GOTERM_BP_ALL	GO:0044767~single-organism developmental process	155	44.4126	9.73663e-09	SPI1, CSF1, LST1, NAB2, ATN1, SMC6, MSI2, PRDM1, ETS1, PHB2, ELK3, PREX1, LGALS1, ALCAM, TRIM28, UBASH3B, MYC, PIM1, FAM65B, CHAC1, JUNB, IL6R, EPHB4, PRKCD, ARID5B, TTC7A, BCR, MSH6, ADAM17, TBL1XR1, DDIT4, MYADM, TBC1D24, S100A6, ATP6V0D1, TRIB1, S100A8, ANAPC2, INSIG1, SLC1A3, ADRB2, IQGAP3, ZFP36L2, SLC9A1, ADGRG3, KCNMB1, PSAP, NLRP3, MBP, HIVEP3, ZBTB7B, BCL9L, HEXIM1, CCR1, VASP, XBP1, SMA…	324	5475	16792	1.46725	4.91298e-05	7.4441e-07	6.78761e-07
GOTERM_BP_ALL	GO:0002237~response to molecule of bacterial origin	25	7.16332	1.138e-08	CX3CR1, HDAC5, SCARB1, PRDM1, CNR2, IRAK2, NLRP3, CD14, JUNB, XBP1, SLC11A1, LILRB2, FOS, TNFRSF1B, TNFRSF1A, BCR, HCK, ADAM17, IL1B, RARA, IRF8, LTBR, TRIB1, S100A8, IFNAR1	324	316	16792	4.10025	5.7422e-05	8.5707e-07	7.81486e-07
GOTERM_BP_ALL	GO:0002252~immune effector process	40	11.4613	1.23032e-08	SASH3, CX3CR1, NLRC5, HMGB1, PHB2, LYST, PRAM1, LFNG, LGALS1, HLX, MYO18A, NLRP3, VSIG4, IL6R, XBP1, SYK, SLC11A1, TUBB, PRKCD, TUBB4B, HLA-E, MSH6, BCR, APBB1IP, IGLL5, HCK, ADAM17, BCL6, IRF1, IL1B, DDIT4, RARA, PTPN6, TLR7, PTX3, LCP1, TRIM38, IL7R, ADA, IFNAR1	324	742	16792	2.79392	6.208e-05	9.12384e-07	8.31922e-07
GOTERM_BP_ALL	GO:0009888~tissue development	69	19.7708	1.24761e-08	DDR1, BTG2, SPI1, CSF1, CPQ, CHD7, PRDM1, PHB2, LFNG, TRIM28, ADAMTSL4, MYC, FLOT1, FAM65B, JUNB, CTSB, KLF10, SRGN, DUSP1, MSGN1, GAB1, ARID5B, EMP1, TFIP11, FOS, DUSP6, TGFBR2, TNFRSF1A, HCK, ADAM17, TBL1XR1, IL1B, MYADM, RARA, FAM20C, LCP1, CD44, LRP5, ADRB2, ACVR1B, IQGAP3, RASIP1, SLC9A1, ZNRF3, RXRA, HLX, PSAP, HIVEP3, ZBTB7B, BCL9L, CCR1, VASP, XBP1, SMAD3, INSR, FN1, MSN, SMAD6, ACVR2A, F…	324	1756	16792	2.03649	6.29525e-05	9.12384e-07	8.31922e-07
GOTERM_BP_ALL	GO:0048584~positive regulation of response to stimulus	76	21.7765	1.36352e-08	HIP1, ANKLE1, CSF1, CCL4L2, HMGB1, ETS1, PHB2, HERPUD1, LFNG, SPRED1, PPP3CC, LGALS1, TRIM28, MYC, BLNK, FLOT1, VSIG4, IL6R, CTSB, SYK, SLC11A1, PRKCD, GAB1, TNFRSF1B, DUSP6, TGFBR2, HLA-E, TNFRSF1A, MSH6, HCK, HSH2D, ADAM17, IRF1, IL1B, RARA, TLR7, LCP2, S100A8, CD44, BLK, SASH3, CCL3L3, NLRC5, ADRB2, ACVR1B, IQGAP3, SLC9A1, HLX, IRAK2, NACC2, PSAP, SH3BP2, S100A12, NLRP3, BMF, CD14, SH2B3, PAG1…	324	2030	16792	1.94033	6.88006e-05	9.829e-07	8.96219e-07
GOTERM_BP_ALL	GO:0050776~regulation of immune response	45	12.894	1.67405e-08	BLK, SASH3, SIGLEC9, NLRC5, HMGB1, PHB2, PRAM1, HLX, IRAK2, FCGRT, FLOT1, NLRP3, ITGB7, CD14, VSIG4, CD300LF, PAG1, LAIR1, CTSB, XBP1, SMAD3, SYK, CMTM3, SLC11A1, PRKCD, LILRB2, FOS, HLA-E, MSH6, BCR, IGLL5, HCK, THEMIS2, BCL6, IRF1, IL1B, RARA, CD300E, PTPN6, TLR7, LCP2, PIK3AP1, IL7R, ADA, IFNAR1	324	912	16792	2.55726	8.4469e-05	1.18975e-06	1.08483e-06
GOTERM_BP_ALL	GO:0070887~cellular response to chemical stimulus	91	26.0745	1.79874e-08	SCARB1, SLC27A1, SPI1, CSF1, CCL4L2, LRRC4, HMGB1, PRDM1, ETS1, PHB2, LYST, HERPUD1, PREX1, SPRED1, LGALS1, MYC, PIM1, FLOT1, PMEPA1, JUNB, IL6R, CTSB, KLF10, SYK, ACSL1, DUSP1, PRKCD, RHOG, GAB1, AGTRAP, FOS, TNFRSF1B, DUSP6, TGFBR2, HLA-E, TNFRSF1A, HCK, ADAM17, BIN2, IRF1, IL1B, DDIT4, PXDN, RARA, FAM20C, IRF8, ATP6V0D1, TRIB1, S100A8, CD44, IFNAR1, CX3CR1, HDAC5, CCL3L3, NLRC5, IQGAP3, ZFP36L…	324	2648	16792	1.78107	9.07602e-05	1.25958e-06	1.14849e-06
GOTERM_BP_ALL	GO:0048856~anatomical structure development	154	44.1261	1.82222e-08	SPI1, CSF1, LST1, NAB2, ATN1, MSI2, PRDM1, ETS1, PHB2, ELK3, PREX1, LGALS1, ALCAM, TRIM28, UBASH3B, MYC, PIM1, FAM65B, CHAC1, JUNB, IL6R, EPHB4, ARID5B, TTC7A, BCR, MSH6, ADAM17, TBL1XR1, DDIT4, MYADM, TBC1D24, S100A6, ATP6V0D1, TRIB1, S100A8, ANAPC2, INSIG1, SLC1A3, ADRB2, IQGAP3, ZFP36L2, SLC9A1, ADGRG3, PSAP, NLRP3, MBP, HIVEP3, ZBTB7B, BCL9L, HEXIM1, CCR1, VASP, XBP1, SMAD3, BCL11A, INSR, FBX…	324	5473	16792	1.45832	9.19448e-05	1.25958e-06	1.14849e-06
GOTERM_BP_ALL	GO:0050900~leukocyte migration	27	7.73639	1.91762e-08	CX3CR1, CSF1, CCL4L2, CCL3L3, HMGB1, LYST, PREX1, CNR2, S100A12, SIRPA, ITGB7, IL6R, CCR1, SYK, FN1, MSN, BCR, SLC7A5, HCK, NLRP12, ADAM17, IL1B, MYH9, PTPN6, CD44, S100A8, ADA	324	376	16792	3.72163	9.67586e-05	1.30761e-06	1.1923e-06
GOTERM_BP_ALL	GO:0050794~regulation of cellular process	249	71.3467	2.05406e-08	SPI1, ANKLE1, MAML2, LST1, SMC6, PHB2, ELK3, PREX1, ALCAM, LGALS1, RASSF3, TRIM28, UBASH3B, RASSF4, MYC, FTH1, VSIG4, CHAC1, CCNL1, JUNB, EPHB4, ACSL1, SFMBT2, SLC11A1, PRKCD, CACNA2D4, HLA-E, BCR, DDIT4, RIN3, ATP6V0D1, TRIB1, PIF1, PTTG1IP, IQGAP3, INPP5A, KCNMB1, S100A12, HIVEP3, CD14, ZBTB7B, PAG1, ATP6V1C1, CCR1, VASP, HEXIM1, CDT1, XBP1, BCL11A, INSR, INTS3, FN1, ELL2, FOSL2, ID2, AGO2, SNA…	324	10489	16792	1.23033	0.000103642	1.37117e-06	1.25024e-06
GOTERM_BP_ALL	GO:0009617~response to bacterium	33	9.45559	2.06517e-08	CX3CR1, HDAC5, SCARB1, PRDM1, LYST, CNR2, IRAK2, S100A12, NLRP3, CD14, JUNB, IL6R, XBP1, SYK, SLC11A1, PRKCD, LILRB2, FOS, TNFRSF1B, TNFRSF1A, HLA-E, BCR, IGLL5, HCK, ADAM17, IL1B, RARA, IRF8, TNFSF8, LTBR, TRIB1, S100A8, IFNAR1	324	544	16792	3.14393	0.000104203	1.37117e-06	1.25024e-06
GOTERM_BP_ALL	GO:0035556~intracellular signal transduction	91	26.0745	2.12061e-08	BTG2, HIP1, CSF1, CCL4L2, LRRC4, ARHGEF10L, HMGB1, PHB2, HERPUD1, PREX1, SPRED1, LGALS1, TRIM28, MYC, PSD4, TAGAP, BLNK, FLOT1, CHAC1, IL6R, SYK, DUSP1, RFC2, PRKCD, RHOG, GAB1, PPP2R5C, TNFRSF1B, DUSP6, TNFRSF1A, ARHGAP45, MSH6, BCR, IL1B, DDIT4, MYADM, TLR7, LCP2, LCP1, TRIB1, S100A8, CD44, IFNAR1, BLK, CCL3L3, ADRB2, PTTG1IP, RASAL3, IQGAP3, RHOBTB1, ZFP36L2, AURKB, SLC9A1, ADGRG3, INPP5A, RAB…	324	2657	16792	1.77504	0.000107	1.38969e-06	1.26713e-06
GOTERM_BP_ALL	GO:0008283~cell proliferation	71	20.3438	2.3408e-08	DDR1, SCARB1, BTG2, USPL1, CSF1, LST1, NAB2, HMGB1, PRDM1, ETS1, PHB2, CCND3, MYC, FTH1, PIM1, VSIG4, JUNB, IL6R, KLF10, EGFL7, SYK, SLC11A1, PRKCD, RHOG, GAB1, EMP1, PPP2R5C, TGFBR2, HLA-E, ETV6, HCK, ADAM17, IRF1, IL1B, DDIT4, S100A6, RARA, TRIB1, DBN1, SASH3, CX3CR1, LRP1, INSIG1, CCL3L3, LRP5, RETN, RASAL3, IQGAP3, ZFP36L2, AURKB, ZNRF3, RXRA, HLX, NACC2, CREG1, RBM38, XBP1, SMAD3, INSR, OSM,…	324	1861	16792	1.97729	0.00011811	1.51431e-06	1.38077e-06
GOTERM_BP_ALL	GO:0002274~myeloid leukocyte activation	17	4.87106	2.43062e-08	CX3CR1, SPI1, SYK, CD93, CSF1, SLC11A1, PRKCD, HMGB1, PRAM1, TGFBR2, BCR, PREX1, CNR2, S100A12, LCP2, TLR7, LTBR	324	147	16792	5.99362	0.000122642	1.55252e-06	1.41561e-06
GOTERM_BP_ALL	GO:0071310~cellular response to organic substance	79	22.6361	2.93484e-08	SCARB1, SLC27A1, SPI1, CSF1, CCL4L2, LRRC4, PRDM1, PHB2, HERPUD1, SPRED1, LGALS1, MYC, PIM1, FLOT1, PMEPA1, JUNB, IL6R, CTSB, KLF10, SYK, ACSL1, DUSP1, PRKCD, GAB1, AGTRAP, FOS, TNFRSF1B, DUSP6, TGFBR2, HLA-E, TNFRSF1A, HCK, ADAM17, IRF1, IL1B, DDIT4, PXDN, RARA, FAM20C, IRF8, ATP6V0D1, TRIB1, CD44, IFNAR1, CX3CR1, HDAC5, CCL3L3, NLRC5, IQGAP3, ZFP36L2, SLC9A1, RXRA, IRAK2, KCNMB1, GNG7, PSAP, UG…	324	2186	16792	1.87299	0.000148081	1.85115e-06	1.6879e-06
GOTERM_BP_ALL	GO:0009605~response to external stimulus	76	21.7765	3.32198e-08	SCARB1, BTG2, CSF1, CCL4L2, HMGB1, PRDM1, ETS1, PHB2, LYST, PREX1, ALCAM, UBASH3B, PLAU, PIM1, JUNB, IL6R, KLF10, SYK, ACSL1, SLC11A1, PRKCD, RHOG, CACNA2D4, FOS, TNFRSF1B, TGFBR2, HLA-E, TNFRSF1A, ENAH, BCR, HCK, ADAM17, BIN2, TBL1XR1, IRF1, IL1B, DDIT4, RARA, IRF8, TLR7, TRIB1, S100A8, IFNAR1, CX3CR1, HDAC5, CCL3L3, NLRC5, SLC1A3, RETN, ADRB2, SLC9A1, CNR2, IRAK2, S100A12, NLRP3, CD14, CCR1, VA…	324	2073	16792	1.90008	0.000167613	2.06947e-06	1.88696e-06
GOTERM_BP_ALL	GO:0045580~regulation of T cell differentiation	15	4.29799	3.54276e-08	SASH3, XBP1, SYK, HMGB1, LILRB2, PRDM1, TGFBR2, BCL6, HLX, IRF1, RARA, NLRP3, ZBTB7B, IL7R, ADA	324	113	16792	6.87971	0.000178752	2.18009e-06	1.98783e-06
GOTERM_BP_ALL	GO:0046637~regulation of alpha-beta T cell differentiation	11	3.15186	3.83347e-08	SASH3, SYK, BCL6, HLX, RARA, NLRP3, HMGB1, PRDM1, ZBTB7B, ADA, TGFBR2	324	51	16792	11.1784	0.000193418	2.33056e-06	2.12504e-06
GOTERM_BP_ALL	GO:0046631~alpha-beta T cell activation	15	4.29799	3.96954e-08	SASH3, SYK, HMGB1, PRDM1, RASAL3, TGFBR2, HLA-E, BCL6, HLX, IRF1, RARA, NLRP3, TNFSF8, ZBTB7B, ADA	324	114	16792	6.81936	0.000200283	2.38456e-06	2.17427e-06
GOTERM_BP_ALL	GO:1903037~regulation of leukocyte cell-cell adhesion	24	6.87679	4.28721e-08	SASH3, XBP1, SYK, HMGB1, LILRB2, PRDM1, RASAL3, ETS1, TGFBR2, HLA-E, LGALS1, BCL6, HLX, IL1B, IRF1, RARA, NLRP3, PTPN6, VSIG4, ZBTB7B, IL7R, CD44, ADA, PAG1	324	313	16792	3.97397	0.000216309	2.54509e-06	2.32064e-06
GOTERM_BP_ALL	GO:0050793~regulation of developmental process	77	22.063	4.60718e-08	SPI1, CSF1, LST1, NAB2, CHD7, HMGB1, PRDM1, SYNE3, ETS1, PHB2, TRIOBP, LFNG, PREX1, LGALS1, UBASH3B, MYC, FLOT1, KLF10, SRGN, ZHX2, SYK, FOS, DUSP6, TGFBR2, TNFRSF1A, MSH6, BCR, HCK, IRF1, IL1B, TMBIM1, MYADM, RARA, TBC1D24, FAM20C, MYH9, TRIB1, DBN1, ANAPC2, SASH3, CX3CR1, HDAC5, LRP1, ASAP1, RETN, ADRB2, ACVR1B, IQGAP3, ZFP36L2, ZNRF3, RXRA, HLX, NLRP3, ZBTB7B, BCL9L, CCR1, RBM38, XBP1, SMAD3, …	324	2129	16792	1.87444	0.000232451	2.70323e-06	2.46484e-06
GOTERM_BP_ALL	GO:0044707~single-multicellular organism process	162	46.4183	5.36246e-08	SCARB1, SLC27A1, SPI1, CSF1, LST1, NAB2, ATN1, PRDM1, ETS1, PHB2, ELK3, PREX1, LGALS1, ALCAM, TRIM28, UBASH3B, PLAU, MYC, PIM1, FAM65B, VSIG4, CHAC1, RPS11, JUNB, IL6R, EPHB4, SLC11A1, PRKCD, ARID5B, TTC7A, CACNA2D4, HLA-E, BCR, MSH6, ADAM17, TBL1XR1, DDIT4, MYADM, TBC1D24, S100A6, ATP6V0D1, TRIB1, S100A8, IFNAR1, ANAPC2, INSIG1, SLC1A3, ADRB2, IQGAP3, ZFP36L2, SLC9A1, ADGRG3, KCNMB1, PSAP, NLRP3…	324	5943	16792	1.41275	0.000270553	3.11023e-06	2.83594e-06
GOTERM_BP_ALL	GO:0050789~regulation of biological process	255	73.0659	5.4605e-08	SPI1, ANKLE1, MAML2, LST1, SMC6, PHB2, ELK3, PREX1, ALCAM, LGALS1, RASSF3, TRIM28, UBASH3B, RASSF4, MYC, FTH1, VSIG4, CHAC1, CCNL1, JUNB, EPHB4, ACSL1, SFMBT2, SLC11A1, PRKCD, CACNA2D4, HLA-E, BCR, DDIT4, RIN3, ATP6V0D1, TRIB1, PIF1, TTYH1, PTTG1IP, IQGAP3, INPP5A, KCNMB1, S100A12, HIVEP3, CD14, ZBTB7B, PAG1, ATP6V1C1, CCR1, VASP, HEXIM1, CDT1, XBP1, BCL11A, INSR, INTS3, FN1, ELL2, FOSL2, ID2, AG…	324	10922	16792	1.21003	0.000275499	3.1311e-06	2.85497e-06
GOTERM_BP_ALL	GO:0007166~cell surface receptor signaling pathway	90	25.788	5.53462e-08	DDR1, SCARB1, SLC27A1, HIP1, SIGLEC9, CSF1, MAML2, CCL4L2, LRRC4, PRDM1, LFNG, SPRED1, FCGRT, MYC, BLNK, PMEPA1, ITGB7, CHAC1, IL6R, EPHB4, KLF10, EGFL7, SYK, ACSL1, RHBDF2, PRKCD, GAB1, ARID5B, FOS, TNFRSF1B, TGFBR2, HLA-E, TNFRSF1A, BCR, HCK, ADAM17, TBL1XR1, IRF1, IL1B, DDIT4, PXDN, TMBIM1, MYH9, IRF8, LCP2, ATP6V0D1, TRIB1, CD44, IFNAR1, BLK, CX3CR1, LRP1, NXN, CCL3L3, NLRC5, LRP5, ADRB2, ACV…	324	2669	16792	1.74764	0.000279238	3.13794e-06	2.86121e-06
GOTERM_BP_ALL	GO:0034097~response to cytokine	40	11.4613	9.75638e-08	CX3CR1, SLC27A1, CSF1, CCL4L2, CCL3L3, NLRC5, LRRC4, ETS1, ZFP36L2, IRAK2, MYC, CD14, JUNB, IL6R, CCR1, XBP1, SYK, ACSL1, SLC11A1, PRKCD, OSM, GAB1, FOS, TNFRSF1B, TNFRSF1A, HLA-E, HCK, NLRP12, ADAM17, IRF1, IL1B, PXDN, RARA, IRF8, PTPN6, LTBR, TRIM38, IL7R, CD44, IFNAR1	324	802	16792	2.5849	0.000492186	5.47008e-06	4.98768e-06
GOTERM_BP_ALL	GO:0046632~alpha-beta T cell differentiation	13	3.72493	1.02103e-07	SASH3, SYK, HMGB1, PRDM1, TGFBR2, BCL6, HLX, IRF1, RARA, NLRP3, TNFSF8, ZBTB7B, ADA	324	87	16792	7.74429	0.00051508	5.66168e-06	5.16238e-06
GOTERM_BP_ALL	GO:0051249~regulation of lymphocyte activation	27	7.73639	1.13896e-07	SASH3, LST1, HMGB1, PRDM1, RASAL3, ZFP36L2, LGALS1, HLX, NLRP3, VSIG4, ZBTB7B, PAG1, XBP1, SYK, LILRB2, TGFBR2, HLA-E, MSH6, IGLL5, BCL6, ID2, IRF1, IL1B, RARA, PTPN6, IL7R, ADA	324	411	16792	3.4047	0.000574556	6.1869e-06	5.64129e-06
GOTERM_BP_ALL	GO:0009607~response to biotic stimulus	42	12.0344	1.14034e-07	CX3CR1, HDAC5, SCARB1, NLRC5, HMGB1, PRDM1, LYST, CNR2, IRAK2, MYC, S100A12, NLRP3, CD14, JUNB, IL6R, XBP1, SMAD3, SYK, SLC11A1, PRKCD, LILRB2, FOS, TNFRSF1B, TNFRSF1A, HLA-E, BCR, IGLL5, HCK, ADAM17, IRF1, IL1B, DDIT4, RARA, IRF8, TLR7, PTX3, TNFSF8, LTBR, TRIM38, TRIB1, S100A8, IFNAR1	324	873	16792	2.4934	0.000575252	6.1869e-06	5.64129e-06
GOTERM_BP_ALL	GO:0006366~transcription from RNA polymerase II promoter	68	19.4842	1.15253e-07	BTG2, SPI1, MAML2, ELL, CHD7, ATN1, ARHGEF10L, HMGB1, PRDM1, ETS1, IRF2BPL, ELK3, TRIM28, MYC, CCNL1, JUNB, KLF10, ZHX2, SLC11A1, USP3, MSGN1, TFEB, ARID5B, FOS, ETV6, TNFRSF1A, TBL1XR1, IRF1, IL1B, RARA, IRF8, MZF1, HDAC5, AKNA, INSIG1, NLRC5, LRP5, ADRB2, ACVR1B, AURKB, SLC9A1, RXRA, NACC2, E2F2, NLRP3, HIVEP3, ZBTB7B, POLR2J, BCL9L, HEXIM1, XBP1, SMAD3, INTS1, BCL11A, INTS3, OSM, SMAD6, ELL2, …	324	1820	16792	1.9364	0.0005814	6.1869e-06	5.64129e-06
GOTERM_BP_ALL	GO:0045785~positive regulation of cell adhesion	26	7.44986	1.2257e-07	SASH3, CSF1, HMGB1, RASAL3, ETS1, TRIOBP, PREX1, LGALS1, HLX, FLOT1, NLRP3, XBP1, SMAD3, SYK, FN1, LILRB2, TGFBR2, HLA-E, APBB1IP, IL1B, MYADM, RARA, PTPN6, IL7R, CD44, ADA	324	385	16792	3.50002	0.000618296	6.5104e-06	5.93625e-06
GOTERM_BP_ALL	GO:0001932~regulation of protein phosphorylation	54	15.4728	1.38964e-07	SLC27A1, CSF1, CCL4L2, LRRC4, HMGB1, PHB2, CCND3, SPRED1, UBASH3B, MYC, PIM1, FLOT1, PMEPA1, CCNL1, IL6R, SYK, ACSL1, DUSP1, SLC11A1, PRKCD, GAB1, TNFRSF1B, DUSP6, TGFBR2, TNFRSF1A, ADAM17, IL1B, DDIT4, MYADM, TLR7, LCP2, TRIB1, CD44, IFNAR1, CCL3L3, LRP5, ADRB2, ACVR1B, IQGAP3, IRAK2, PSAP, S100A12, CCR1, HEXIM1, XBP1, INSR, OSM, FN1, SMAD6, ACVR2A, NLRP12, PDCD4, PTPN6, LTBR	324	1300	16792	2.15282	0.000700968	7.30431e-06	6.66015e-06
GOTERM_BP_ALL	GO:0007275~multicellular organism development	138	39.5415	1.61001e-07	SPI1, CSF1, LST1, NAB2, ATN1, PRDM1, ETS1, PHB2, ELK3, PREX1, LGALS1, ALCAM, TRIM28, UBASH3B, MYC, PIM1, FAM65B, CHAC1, JUNB, IL6R, EPHB4, ARID5B, TTC7A, BCR, MSH6, ADAM17, TBL1XR1, DDIT4, MYADM, TBC1D24, S100A6, ATP6V0D1, TRIB1, S100A8, ANAPC2, INSIG1, SLC1A3, ADRB2, IQGAP3, ZFP36L2, SLC9A1, ADGRG3, PSAP, NLRP3, MBP, HIVEP3, ZBTB7B, BCL9L, HEXIM1, CCR1, VASP, XBP1, SMAD3, BCL11A, INSR, FBXO38, F…	324	4877	16792	1.46651	0.000812081	8.37537e-06	7.63676e-06
GOTERM_BP_ALL	GO:0050727~regulation of inflammatory response	23	6.59026	1.94956e-07	CX3CR1, SMAD3, CCL3L3, CCL4L2, PRKCD, OSM, TNFRSF1B, ETS1, PHB2, TNFRSF1A, BCR, HCK, NLRP12, CNR2, BCL6, IL1B, ALOX5AP, S100A12, NLRP3, TLR7, PIK3AP1, ADA, S100A8	324	314	16792	3.79626	0.000983265	1.00382e-05	9.15299e-06
GOTERM_BP_ALL	GO:0048731~system development	125	35.8166	2.05139e-07	SPI1, CSF1, LST1, NAB2, ATN1, PRDM1, ETS1, PHB2, ELK3, PREX1, LGALS1, ALCAM, TRIM28, UBASH3B, MYC, FAM65B, CHAC1, JUNB, IL6R, EPHB4, ARID5B, TTC7A, BCR, MSH6, ADAM17, TBL1XR1, DDIT4, TBC1D24, S100A6, ATP6V0D1, TRIB1, S100A8, ANAPC2, INSIG1, SLC1A3, ADRB2, IQGAP3, ZFP36L2, SLC9A1, ADGRG3, PSAP, NLRP3, MBP, HIVEP3, ZBTB7B, BCL9L, HEXIM1, CCR1, VASP, XBP1, SMAD3, BCL11A, INSR, FBXO38, FN1, MSN, ARHG…	324	4291	16792	1.50976	0.0010346	1.04559e-05	9.53379e-06
GOTERM_BP_ALL	GO:0045595~regulation of cell differentiation	60	17.192	2.27295e-07	SPI1, CSF1, CHD7, HMGB1, PRDM1, ETS1, TRIOBP, PREX1, LGALS1, UBASH3B, MYC, FLOT1, JUNB, IL6R, KLF10, ZHX2, SYK, FOS, DUSP6, TGFBR2, TNFRSF1A, IRF1, IL1B, MYADM, RARA, FAM20C, TRIB1, DBN1, ANAPC2, SASH3, CX3CR1, HDAC5, LRP1, INSIG1, LRP5, ASAP1, ACVR1B, ZFP36L2, HLX, NLRP3, ZBTB7B, BCL9L, CCR1, RBM38, XBP1, SMAD3, BCL11A, FBXO38, FN1, LILRB2, ACVR2A, RCAN1, BCL6, ID2, SNAI1, PDCD4, ID3, PTPN6, IL7…	324	1544	16792	2.01401	0.00114627	1.13214e-05	1.03229e-05
GOTERM_BP_ALL	GO:0051707~response to other organism	40	11.4613	2.2885e-07	CX3CR1, HDAC5, SCARB1, NLRC5, PRDM1, LYST, CNR2, IRAK2, S100A12, NLRP3, CD14, JUNB, IL6R, XBP1, SMAD3, SYK, SLC11A1, PRKCD, LILRB2, FOS, TNFRSF1B, TNFRSF1A, HLA-E, BCR, IGLL5, HCK, ADAM17, IRF1, IL1B, DDIT4, RARA, IRF8, TLR7, PTX3, TNFSF8, LTBR, TRIM38, TRIB1, S100A8, IFNAR1	324	829	16792	2.50071	0.00115411	1.13214e-05	1.03229e-05
GOTERM_BP_ALL	GO:0043207~response to external biotic stimulus	40	11.4613	2.2885e-07	CX3CR1, HDAC5, SCARB1, NLRC5, PRDM1, LYST, CNR2, IRAK2, S100A12, NLRP3, CD14, JUNB, IL6R, XBP1, SMAD3, SYK, SLC11A1, PRKCD, LILRB2, FOS, TNFRSF1B, TNFRSF1A, HLA-E, BCR, IGLL5, HCK, ADAM17, IRF1, IL1B, DDIT4, RARA, IRF8, TLR7, PTX3, TNFSF8, LTBR, TRIM38, TRIB1, S100A8, IFNAR1	324	829	16792	2.50071	0.00115411	1.13214e-05	1.03229e-05
GOTERM_BP_ALL	GO:0080134~regulation of response to stress	53	15.1862	2.3297e-07	ANKLE1, CCL4L2, HMGB1, ETS1, PHB2, HERPUD1, SPRED1, TRIM28, UBASH3B, PLAU, MYC, FLOT1, CTSB, SYK, PRKCD, GAB1, TFIP11, TNFRSF1B, TGFBR2, HLA-E, TNFRSF1A, BCR, HCK, IRF1, IL1B, TLR7, S100A8, CD44, IFNAR1, CX3CR1, CCL3L3, NLRC5, PTTG1IP, CNR2, IRAK2, NACC2, PSAP, S100A12, NLRP3, CD14, XBP1, SMAD3, OSM, NLRP12, BCL6, ALOX5AP, SNAI1, PDCD4, PTPN6, LTBR, TRIM38, PIK3AP1, ADA	324	1285	16792	2.13762	0.00117488	1.14133e-05	1.04068e-05
GOTERM_BP_ALL	GO:0045944~positive regulation of transcription from RNA polymerase II promoter	46	13.1805	2.79182e-07	HDAC5, AKNA, SPI1, MAML2, ELL, INSIG1, CHD7, NLRC5, LRP5, ARHGEF10L, HMGB1, ADRB2, ACVR1B, ETS1, IRF2BPL, SLC9A1, ELK3, RXRA, TRIM28, MYC, NLRP3, CCNL1, JUNB, BCL9L, XBP1, SMAD3, BCL11A, SLC11A1, MSGN1, TFEB, OSM, FOS, SMAD6, ACVR2A, ETV6, TNFRSF1A, FOSL2, TBL1XR1, IRF1, IL1B, AGO2, RARA, IRF8, TNFSF8, MZF1, LPIN2	324	1041	16792	2.29015	0.00140776	1.35457e-05	1.23511e-05
GOTERM_BP_ALL	GO:0031347~regulation of defense response	35	10.0287	3.21985e-07	CX3CR1, CCL4L2, CCL3L3, NLRC5, HMGB1, ETS1, PHB2, CNR2, IRAK2, FLOT1, S100A12, NLRP3, CD14, CTSB, SMAD3, SYK, PRKCD, OSM, TNFRSF1B, TNFRSF1A, HLA-E, BCR, HCK, NLRP12, BCL6, IRF1, IL1B, ALOX5AP, PTPN6, TLR7, TRIM38, PIK3AP1, S100A8, ADA, IFNAR1	324	676	16792	2.68336	0.00162341	1.54737e-05	1.41091e-05
GOTERM_BP_ALL	GO:0045597~positive regulation of cell differentiation	40	11.4613	3.30996e-07	SASH3, CX3CR1, CSF1, LRP5, HMGB1, PRDM1, ACVR1B, ETS1, TRIOBP, PREX1, LGALS1, HLX, MYC, FLOT1, NLRP3, JUNB, IL6R, BCL9L, CCR1, KLF10, XBP1, SMAD3, SYK, BCL11A, FBXO38, FN1, LILRB2, FOS, ACVR2A, TGFBR2, BCL6, ID2, MYADM, SNAI1, RARA, FAM20C, TRIB1, IL7R, ADA, ANAPC2	324	841	16792	2.46503	0.00166881	1.57566e-05	1.43671e-05
GOTERM_BP_ALL	GO:0006928~movement of cell or subcellular component	66	18.9112	3.3885e-07	DDR1, SCARB1, CSF1, CCL4L2, HMGB1, ETS1, LYST, PREX1, PSTPIP1, ALCAM, PLAU, MYC, MYO18A, SIRPA, ITGB7, IL6R, EPHB4, CAP1, SYK, TUBB, PRKCD, RHOG, GAB1, ARID5B, TGFBR2, ENAH, BCR, SLC7A5, HCK, ADAM17, BIN2, IL1B, DDIT4, MYADM, MYH9, LCP1, TRIB1, S100A8, CD44, SDCCAG8, CX3CR1, HDAC5, LRP1, CCL3L3, LRP5, RETN, ACVR1B, SLC9A1, ADGRG3, PARD6B, CNR2, S100A12, CCR1, VASP, XBP1, SMAD3, INSR, FN1, MSN, TU…	324	1795	16792	1.90562	0.00170838	1.59798e-05	1.45706e-05
GOTERM_BP_ALL	GO:0010033~response to organic substance	91	26.0745	3.56362e-07	SCARB1, BTG2, SLC27A1, SPI1, CSF1, CCL4L2, LRRC4, HMGB1, PRDM1, ETS1, PHB2, HERPUD1, SPRED1, LGALS1, MYC, PIM1, FLOT1, PMEPA1, CHAC1, JUNB, IL6R, CTSB, KLF10, SYK, ACSL1, DUSP1, SLC11A1, PRKCD, GAB1, AGTRAP, DNTT, FOS, TNFRSF1B, DUSP6, TGFBR2, HLA-E, TNFRSF1A, BCR, HCK, ADAM17, IRF1, IL1B, DDIT4, PXDN, RARA, FAM20C, IRF8, ATP6V0D1, TRIB1, S100A8, CD44, IFNAR1, CX3CR1, HDAC5, CCL3L3, NLRC5, LRP5, …	324	2822	16792	1.67125	0.00179659	1.6534e-05	1.50759e-05
GOTERM_BP_ALL	GO:0050863~regulation of T cell activation	22	6.30372	3.57155e-07	SASH3, XBP1, SYK, HMGB1, LILRB2, PRDM1, RASAL3, TGFBR2, HLA-E, LGALS1, BCL6, HLX, IL1B, IRF1, RARA, NLRP3, PTPN6, VSIG4, ZBTB7B, IL7R, ADA, PAG1	324	299	16792	3.81337	0.00180058	1.6534e-05	1.50759e-05
GOTERM_BP_ALL	GO:0051254~positive regulation of RNA metabolic process	56	16.0458	3.64368e-07	BTG2, SPI1, MAML2, ELL, CHD7, ARHGEF10L, HMGB1, ETS1, IRF2BPL, ELK3, TRIM28, MYC, UBTF, CCNL1, JUNB, SLC11A1, MSGN1, TFEB, RHOG, FOS, ETV6, TNFRSF1A, TBL1XR1, IRF1, IL1B, RARA, IRF8, MZF1, IFNAR1, HDAC5, AKNA, INSIG1, NLRC5, LRP5, ADRB2, ACVR1B, ZFP36L2, SLC9A1, RXRA, NLRP3, HIVEP3, POLR2J, BCL9L, XBP1, SMAD3, BCL11A, INSR, OSM, SMAD6, ACVR2A, FOSL2, ID2, AGO2, SNAI1, TNFSF8, LPIN2	324	1415	16792	2.05111	0.00183691	1.67145e-05	1.52405e-05
GOTERM_BP_ALL	GO:0051239~regulation of multicellular organismal process	87	24.9284	3.96348e-07	SCARB1, SLC27A1, SPI1, CSF1, CHD7, HMGB1, PRDM1, ETS1, PHB2, LFNG, PREX1, LGALS1, UBASH3B, PLAU, MYC, FLOT1, VSIG4, IL6R, KLF10, SRGN, ZHX2, SYK, SLC11A1, PRKCD, CACNA2D4, FOS, DUSP6, TGFBR2, HLA-E, TNFRSF1A, MSH6, BCR, ADAM17, IRF1, IL1B, TMBIM1, MYADM, RARA, FAM20C, IRF8, TLR7, TRIB1, DBN1, ANAPC2, IFNAR1, SASH3, CX3CR1, HDAC5, LRP1, NLRC5, LRP5, ASAP1, RETN, ADRB2, ACVR1B, IQGAP3, ZFP36L2, SLC…	324	2659	16792	1.69574	0.00199797	1.80178e-05	1.64288e-05
GOTERM_BP_ALL	GO:0051174~regulation of phosphorus metabolic process	61	17.4785	4.16925e-07	SLC27A1, CSF1, ELL, CCL4L2, LRRC4, HMGB1, PHB2, CCND3, SPRED1, UBASH3B, MYC, PIM1, FLOT1, PMEPA1, CCNL1, IL6R, CAP1, SYK, ACSL1, DUSP1, SLC11A1, PRKCD, GAB1, TNFRSF1B, DUSP6, TGFBR2, TNFRSF1A, ADAM17, TBL1XR1, IL1B, DDIT4, MYADM, FAM20C, TLR7, LCP2, TRIB1, CD44, IFNAR1, CCL3L3, NLRC5, LRP5, ADRB2, ACVR1B, IQGAP3, IRAK2, PSAP, S100A12, CCR1, HEXIM1, XBP1, SMAD3, INSR, OSM, FN1, KIAA0430, SMAD6, AC…	324	1611	16792	1.96242	0.00210159	1.87839e-05	1.71274e-05
GOTERM_BP_ALL	GO:0048523~negative regulation of cellular process	124	35.5301	4.29397e-07	SLC27A1, SPI1, LST1, NAB2, ATN1, PRDM1, ETS1, PHB2, ELK3, LGALS1, TRIM28, UBASH3B, MYC, FTH1, PIM1, VSIG4, CHAC1, JUNB, BAHCC1, USP3, PRKCD, ARID5B, BCR, MSH6, ADAM17, TBL1XR1, DDIT4, MYADM, MZF1, TRIB1, ANAPC2, BLK, PIF1, INSIG1, CCL3L3, ADRB2, PTTG1IP, RASAL3, ZFP36L2, SLC9A1, ADGRG3, NACC2, PSAP, NLRP3, CD14, PAG1, BCL9L, HEXIM1, XBP1, SMAD3, BCL11A, INTS3, FN1, TBCD, KIAA0430, SMAD6, RCAN1, P…	324	4300	16792	1.49455	0.00216439	1.91747e-05	1.74837e-05
GOTERM_BP_ALL	GO:0006468~protein phosphorylation	67	19.1977	4.83087e-07	DDR1, SLC27A1, CSF1, CCL4L2, LRRC4, HMGB1, PHB2, CCND3, SPRED1, TRIM28, UBASH3B, MYC, PIM1, FLOT1, PMEPA1, CCNL1, IL6R, EPHB4, RPS6KL1, SYK, ACSL1, DUSP1, SLC11A1, PRKCD, GAB1, TNFRSF1B, DUSP6, TGFBR2, TNFRSF1A, BCR, HCK, ADAM17, IL1B, DDIT4, MYADM, RARA, FAM20C, TLR7, LCP2, TRIB1, CD44, IFNAR1, BLK, PXK, CCL3L3, LRP5, ADRB2, RASAL3, ACVR1B, IQGAP3, ZFP36L2, AURKB, IRAK2, PSAP, S100A12, CCR1, HEX…	324	1852	16792	1.87496	0.00243469	2.13829e-05	1.94972e-05
GOTERM_BP_ALL	GO:1901700~response to oxygen-containing compound	57	16.3324	4.94357e-07	SCARB1, BTG2, SLC27A1, SPI1, PRDM1, ETS1, LGALS1, MYC, PIM1, JUNB, KLF10, ACSL1, DUSP1, SLC11A1, PRKCD, GAB1, AGTRAP, DNTT, FOS, TNFRSF1B, TGFBR2, TNFRSF1A, BCR, HCK, ADAM17, IL1B, DDIT4, RARA, IRF8, ATP6V0D1, TRIB1, S100A8, IFNAR1, CX3CR1, HDAC5, LRP5, RETN, ZFP36L2, SLC9A1, RXRA, CNR2, IRAK2, KCNMB1, GNG7, PSAP, UGT3A2, NLRP3, CD14, ATP6V1C1, XBP1, INSR, MSN, LILRB2, PTPRE, ID3, LTBR, ADA	324	1466	16792	2.01511	0.00249142	2.16915e-05	1.97786e-05
GOTERM_BP_ALL	GO:0042325~regulation of phosphorylation	55	15.7593	5.16299e-07	SLC27A1, CSF1, CCL4L2, LRRC4, HMGB1, PHB2, CCND3, SPRED1, UBASH3B, MYC, PIM1, FLOT1, PMEPA1, CCNL1, IL6R, SYK, ACSL1, DUSP1, SLC11A1, PRKCD, GAB1, TNFRSF1B, DUSP6, TGFBR2, TNFRSF1A, ADAM17, IL1B, DDIT4, MYADM, TLR7, LCP2, TRIB1, CD44, IFNAR1, CCL3L3, NLRC5, LRP5, ADRB2, ACVR1B, IQGAP3, IRAK2, PSAP, S100A12, CCR1, HEXIM1, XBP1, INSR, OSM, FN1, SMAD6, ACVR2A, NLRP12, PDCD4, PTPN6, LTBR	324	1393	16792	2.0463	0.00260185	2.2459e-05	2.04784e-05
GOTERM_BP_ALL	GO:0031399~regulation of protein modification process	62	17.765	5.5485e-07	SLC27A1, SPI1, CSF1, CCL4L2, LRRC4, HMGB1, PHB2, HERPUD1, CCND3, SPRED1, UBASH3B, MYC, PIM1, FLOT1, PMEPA1, CCNL1, IL6R, SYK, ACSL1, DUSP1, SLC11A1, PRKCD, GAB1, TNFRSF1B, DUSP6, TGFBR2, TNFRSF1A, ADAM17, IL1B, DDIT4, MYADM, TLR7, LCP2, TRIB1, CD44, ANAPC2, IFNAR1, HDAC5, NXN, CCL3L3, LRP5, ADRB2, PTTG1IP, ACVR1B, IQGAP3, IRAK2, PSAP, S100A12, CCR1, HEXIM1, XBP1, INSR, OSM, FN1, SMAD6, ACVR2A, NL…	324	1664	16792	1.93106	0.00279586	2.39297e-05	2.18194e-05
GOTERM_BP_ALL	GO:0033993~response to lipid	40	11.4613	5.84357e-07	CX3CR1, HDAC5, SCARB1, HMGB1, PRDM1, ETS1, PHB2, ZFP36L2, RXRA, CNR2, IRAK2, MYC, KCNMB1, PIM1, PMEPA1, NLRP3, CD14, JUNB, XBP1, ACSL1, DUSP1, SLC11A1, MSN, LILRB2, FOS, TNFRSF1B, TGFBR2, TNFRSF1A, BCR, HCK, ADAM17, IL1B, DDIT4, RARA, IRF8, ID3, LTBR, TRIB1, S100A8, IFNAR1	324	860	16792	2.41057	0.00294432	2.49887e-05	2.2785e-05
GOTERM_BP_ALL	GO:1902680~positive regulation of RNA biosynthetic process	54	15.4728	7.02868e-07	SPI1, MAML2, ELL, CHD7, ARHGEF10L, HMGB1, ETS1, IRF2BPL, ELK3, TRIM28, MYC, UBTF, CCNL1, JUNB, SLC11A1, MSGN1, TFEB, RHOG, FOS, ETV6, TNFRSF1A, TBL1XR1, IRF1, IL1B, RARA, IRF8, MZF1, IFNAR1, HDAC5, AKNA, INSIG1, NLRC5, LRP5, ADRB2, ACVR1B, SLC9A1, RXRA, NLRP3, HIVEP3, POLR2J, BCL9L, XBP1, SMAD3, BCL11A, INSR, OSM, SMAD6, ACVR2A, FOSL2, ID2, AGO2, SNAI1, TNFSF8, LPIN2	324	1369	16792	2.04431	0.00354039	2.9678e-05	2.70608e-05
GOTERM_BP_ALL	GO:0043085~positive regulation of catalytic activity	59	16.9054	7.0578e-07	SCARB1, SLC27A1, HIP1, CSF1, CCL4L2, ARHGEF10L, HMGB1, RCBTB2, PREX1, CCND3, MYC, PSD4, TAGAP, PIM1, CCNL1, IL6R, CAP1, SYK, ACSL1, RFC2, SLC11A1, PRKCD, RHOG, GAB1, DUSP6, TGFBR2, ARHGAP45, MSH6, BCR, ADAM17, IL1B, TBC1D24, RIN3, LCP2, S100A8, CD44, ANAPC2, CCL3L3, DENND3, ASAP1, ADRB2, RASAL3, IQGAP3, AURKB, IRAK2, PSAP, S100A12, NLRP3, CYTH1, SMAD3, INSR, FN1, HPS4, TBCD, ARHGAP26, ARHGAP25, N…	324	1559	16792	1.96139	0.00355503	2.9678e-05	2.70608e-05
GOTERM_BP_ALL	GO:0008219~cell death	69	19.7708	7.96745e-07	BTG2, HIP1, SPI1, ATN1, HMGB1, ETS1, PHB2, HERPUD1, PPP3CC, LGALS1, RASSF3, ADAMTSL4, MYC, PIM1, MYO18A, CHAC1, IL6R, CTSB, SRGN, DUSP1, PRKCD, EMP1, PPP2R5C, TNFRSF1B, DUSP6, TGFBR2, ETV6, TNFRSF1A, MSH6, HCK, HSH2D, ADAM17, IRF1, IL1B, DDIT4, TMBIM1, RARA, S100A8, CD44, BLK, CX3CR1, LRP1, LRP5, PTTG1IP, ACVR1B, AURKB, SLC9A1, ZMAT3, NACC2, PSAP, E2F2, NLRP3, BMF, CD14, XBP1, SMAD3, OSM, SMAD6, …	324	1958	16792	1.82639	0.00401231	3.32263e-05	3.02961e-05
GOTERM_BP_ALL	GO:0019220~regulation of phosphate metabolic process	60	17.192	9.13736e-07	SLC27A1, CSF1, ELL, CCL4L2, LRRC4, HMGB1, PHB2, CCND3, SPRED1, UBASH3B, MYC, PIM1, FLOT1, PMEPA1, CCNL1, IL6R, CAP1, SYK, ACSL1, DUSP1, SLC11A1, PRKCD, GAB1, TNFRSF1B, DUSP6, TGFBR2, TNFRSF1A, ADAM17, TBL1XR1, IL1B, DDIT4, MYADM, TLR7, LCP2, TRIB1, CD44, IFNAR1, CCL3L3, NLRC5, LRP5, ADRB2, ACVR1B, IQGAP3, IRAK2, PSAP, S100A12, CCR1, HEXIM1, XBP1, SMAD3, INSR, OSM, FN1, KIAA0430, SMAD6, ACVR2A, NL…	324	1610	16792	1.93145	0.0046001	3.77927e-05	3.44598e-05
GOTERM_BP_ALL	GO:0009968~negative regulation of signal transduction	46	13.1805	9.76655e-07	CX3CR1, LRP1, NXN, NLRC5, LRRC4, ADRB2, PTTG1IP, PRDM1, RASAL3, PHB2, HERPUD1, ADGRG3, LFNG, SPRED1, ZNRF3, UBASH3B, MYC, PMEPA1, NLRP3, CD14, CHAC1, BCL9L, XBP1, EGFL7, SMAD3, DUSP1, PRKCD, SMAD6, DUSP6, TGFBR2, PTPRE, NLRP12, ADAM17, BCL6, IL1B, DDIT4, PXDN, TMBIM1, MYADM, SNAI1, PDCD4, PTPN6, PIK3AP1, TRIB1, CD44, ADA	324	1089	16792	2.18921	0.00491608	4.00667e-05	3.65332e-05
GOTERM_BP_ALL	GO:0010628~positive regulation of gene expression	62	17.765	9.93032e-07	SPI1, CSF1, MAML2, ELL, CHD7, ARHGEF10L, HMGB1, PRDM1, ETS1, IRF2BPL, ELK3, TRIM28, MYC, UBTF, CCNL1, JUNB, SLC11A1, MSGN1, TFEB, RHOG, FOS, ETV6, TNFRSF1A, TBL1XR1, IRF1, IL1B, RARA, MYH9, IRF8, MZF1, IFNAR1, HDAC5, AKNA, INSIG1, NLRC5, LRP5, ADRB2, ACVR1B, IQGAP3, SLC9A1, RXRA, NLRP3, HIVEP3, ZBTB7B, POLR2J, BCL9L, XBP1, SMAD3, BCL11A, INSR, OSM, FN1, MSN, SMAD6, ACVR2A, FOSL2, ID2, AGO2, SNAI1…	324	1692	16792	1.8991	0.00499831	4.041e-05	3.68463e-05
GOTERM_BP_ALL	GO:0012501~programmed cell death	66	18.9112	1.03209e-06	BTG2, HIP1, SPI1, ATN1, HMGB1, ETS1, PHB2, HERPUD1, PPP3CC, LGALS1, RASSF3, ADAMTSL4, MYC, PIM1, MYO18A, CHAC1, IL6R, CTSB, SRGN, DUSP1, PRKCD, PPP2R5C, TNFRSF1B, DUSP6, TGFBR2, ETV6, TNFRSF1A, MSH6, HCK, HSH2D, ADAM17, IRF1, IL1B, DDIT4, TMBIM1, RARA, S100A8, CD44, BLK, CX3CR1, LRP1, LRP5, PTTG1IP, ACVR1B, AURKB, SLC9A1, ZMAT3, NACC2, E2F2, NLRP3, BMF, CD14, XBP1, SMAD3, OSM, SMAD6, PPP1CA, NLRP…	324	1852	16792	1.84697	0.00519439	4.10635e-05	3.74421e-05
GOTERM_BP_ALL	GO:0045893~positive regulation of transcription, DNA-templated	53	15.1862	1.0335e-06	SPI1, MAML2, ELL, CHD7, ARHGEF10L, HMGB1, ETS1, IRF2BPL, ELK3, TRIM28, MYC, UBTF, CCNL1, JUNB, SLC11A1, MSGN1, TFEB, RHOG, FOS, ETV6, TNFRSF1A, TBL1XR1, IRF1, IL1B, RARA, IRF8, MZF1, IFNAR1, HDAC5, AKNA, INSIG1, NLRC5, LRP5, ADRB2, ACVR1B, SLC9A1, RXRA, NLRP3, HIVEP3, BCL9L, XBP1, SMAD3, BCL11A, INSR, OSM, SMAD6, ACVR2A, FOSL2, ID2, AGO2, SNAI1, TNFSF8, LPIN2	324	1349	16792	2.0362	0.00520149	4.10635e-05	3.74421e-05
GOTERM_BP_ALL	GO:1903508~positive regulation of nucleic acid-templated transcription	53	15.1862	1.0335e-06	SPI1, MAML2, ELL, CHD7, ARHGEF10L, HMGB1, ETS1, IRF2BPL, ELK3, TRIM28, MYC, UBTF, CCNL1, JUNB, SLC11A1, MSGN1, TFEB, RHOG, FOS, ETV6, TNFRSF1A, TBL1XR1, IRF1, IL1B, RARA, IRF8, MZF1, IFNAR1, HDAC5, AKNA, INSIG1, NLRC5, LRP5, ADRB2, ACVR1B, SLC9A1, RXRA, NLRP3, HIVEP3, BCL9L, XBP1, SMAD3, BCL11A, INSR, OSM, SMAD6, ACVR2A, FOSL2, ID2, AGO2, SNAI1, TNFSF8, LPIN2	324	1349	16792	2.0362	0.00520149	4.10635e-05	3.74421e-05
GOTERM_BP_ALL	GO:0045935~positive regulation of nucleobase-containing compound metabolic process	61	17.4785	1.0896e-06	BTG2, SPI1, MAML2, ELL, CHD7, ARHGEF10L, HMGB1, ETS1, IRF2BPL, ELK3, TRIM28, MYC, UBTF, CCNL1, JUNB, CAP1, RFC2, SLC11A1, PRKCD, MSGN1, TFEB, RHOG, FOS, ETV6, TNFRSF1A, MSH6, TBL1XR1, IRF1, IL1B, RARA, IRF8, MZF1, IFNAR1, HDAC5, AKNA, INSIG1, NLRC5, LRP5, ADRB2, ACVR1B, ZFP36L2, AURKB, SLC9A1, RXRA, NLRP3, HIVEP3, POLR2J, BCL9L, XBP1, SMAD3, BCL11A, INSR, OSM, SMAD6, ACVR2A, FOSL2, ID2, AGO2, SNA…	324	1658	16792	1.90679	0.00548303	4.2954e-05	3.91659e-05
GOTERM_BP_ALL	GO:0019221~cytokine-mediated signaling pathway	30	8.59599	1.10785e-06	CX3CR1, SLC27A1, CSF1, CCL4L2, CCL3L3, NLRC5, LRRC4, IRAK2, IL6R, CCR1, SYK, ACSL1, PRKCD, OSM, GAB1, TNFRSF1B, TNFRSF1A, HLA-E, HCK, ADAM17, IRF1, IL1B, PXDN, IRF8, PTPN6, LTBR, TRIM38, IL7R, CD44, IFNAR1	324	554	16792	2.80652	0.0055746	4.30239e-05	3.92297e-05
GOTERM_BP_ALL	GO:0009611~response to wounding	33	9.45559	1.10842e-06	DDR1, CX3CR1, SCARB1, CPQ, SLC1A3, HMGB1, ETS1, ZFP36L2, ELK3, LGALS1, UBASH3B, PLAU, MYC, SH2B3, CCR1, XBP1, SMAD3, SYK, SLC11A1, PRKCD, RHOG, FN1, HPS4, TGFBR2, ADAM17, FABP5, IRF1, ID3, MYH9, PTPN6, LCP2, LCP1, S100A8	324	649	16792	2.63528	0.0055775	4.30239e-05	3.92297e-05
GOTERM_BP_ALL	GO:0071222~cellular response to lipopolysaccharide	15	4.29799	1.12656e-06	CX3CR1, SCARB1, HDAC5, XBP1, LILRB2, PRDM1, TNFRSF1B, HCK, IRAK2, IL1B, RARA, IRF8, NLRP3, CD14, TRIB1	324	149	16792	5.2175	0.00566852	4.31884e-05	3.93796e-05
GOTERM_BP_ALL	GO:1903039~positive regulation of leukocyte cell-cell adhesion	18	5.15759	1.13557e-06	SASH3, XBP1, SYK, HMGB1, LILRB2, RASAL3, ETS1, TGFBR2, HLA-E, LGALS1, HLX, IL1B, RARA, NLRP3, PTPN6, IL7R, CD44, ADA	324	218	16792	4.27931	0.00571369	4.31884e-05	3.93796e-05
GOTERM_BP_ALL	GO:0032268~regulation of cellular protein metabolic process	78	22.3496	1.13834e-06	BTG2, SLC27A1, HIP1, SPI1, CSF1, CCL4L2, LRRC4, RNF19B, HMGB1, PHB2, HERPUD1, CCND3, SPRED1, UBASH3B, MYC, PIM1, FLOT1, PMEPA1, CHAC1, CCNL1, IL6R, SYK, ACSL1, DUSP1, SLC11A1, PRKCD, GAB1, TNFRSF1B, DUSP6, TGFBR2, TNFRSF1A, RNF144A, ADAM17, IL1B, DDIT4, MYADM, RARA, MYH9, TLR7, LCP2, TRIB1, S100A8, CD44, ANAPC2, IFNAR1, HDAC5, NXN, CCL3L3, LRP5, ADRB2, PTTG1IP, ACVR1B, IQGAP3, ZFP36L2, RXRA, IRAK…	324	2346	16792	1.72315	0.00572759	4.31884e-05	3.93796e-05
GOTERM_BP_ALL	GO:0051240~positive regulation of multicellular organismal process	55	15.7593	1.19624e-06	SCARB1, SLC27A1, CSF1, CHD7, HMGB1, PRDM1, ETS1, LGALS1, MYC, FLOT1, IL6R, KLF10, SYK, SLC11A1, FOS, TGFBR2, HLA-E, MSH6, ADAM17, IRF1, IL1B, TMBIM1, RARA, FAM20C, IRF8, TLR7, TRIB1, ANAPC2, IFNAR1, SASH3, CX3CR1, RETN, ADRB2, ACVR1B, IQGAP3, SLC9A1, HLX, KCNMB1, NLRP3, CD14, BCL9L, CCR1, XBP1, SMAD3, BCL11A, FBXO38, FN1, LILRB2, ACVR2A, NLRP12, BCL6, ID2, SNAI1, IL7R, ADA	324	1431	16792	1.99196	0.00601805	4.50328e-05	4.10614e-05
GOTERM_BP_ALL	GO:0065007~biological regulation	261	74.7851	1.2048e-06	SPI1, ANKLE1, MAML2, LST1, SMC6, PHB2, RCBTB2, ELK3, PREX1, ALCAM, LGALS1, RASSF3, TRIM28, UBASH3B, RASSF4, MYC, FTH1, VSIG4, CHAC1, CCNL1, JUNB, EPHB4, ACSL1, SFMBT2, SLC11A1, PRKCD, CACNA2D4, HLA-E, BCR, DDIT4, RIN3, ATP6V0D1, TRIB1, PIF1, TTYH1, PTTG1IP, IQGAP3, INPP5A, KCNMB1, S100A12, HIVEP3, CD14, ZBTB7B, PAG1, ATP6V1C1, CCR1, VASP, HEXIM1, CDT1, XBP1, BCL11A, INSR, INTS3, FN1, ELL2, FOSL2,…	324	11548	16792	1.17136	0.00606099	4.50328e-05	4.10614e-05
GOTERM_BP_ALL	GO:0006915~apoptotic process	63	18.0516	1.34687e-06	BTG2, HIP1, SPI1, ATN1, HMGB1, PHB2, HERPUD1, PPP3CC, LGALS1, ADAMTSL4, MYC, PIM1, MYO18A, CHAC1, IL6R, SRGN, DUSP1, PRKCD, PPP2R5C, TNFRSF1B, DUSP6, TGFBR2, ETV6, TNFRSF1A, MSH6, HCK, HSH2D, ADAM17, IRF1, IL1B, DDIT4, TMBIM1, RARA, S100A8, CD44, BLK, CX3CR1, LRP1, LRP5, PTTG1IP, ACVR1B, AURKB, SLC9A1, ZMAT3, NACC2, E2F2, NLRP3, BMF, CD14, XBP1, SMAD3, OSM, SMAD6, PPP1CA, NLRP12, BCL6, SNAI1, PDC…	324	1747	16792	1.86898	0.00677329	4.9973e-05	4.55659e-05
GOTERM_BP_ALL	GO:0032101~regulation of response to external stimulus	35	10.0287	1.37285e-06	CX3CR1, CSF1, CCL4L2, CCL3L3, HMGB1, PRDM1, ETS1, PHB2, UBASH3B, CNR2, PLAU, S100A12, NLRP3, IL6R, CCR1, SMAD3, SYK, PRKCD, OSM, TNFRSF1B, TGFBR2, TNFRSF1A, BCR, HCK, NLRP12, ADAM17, BCL6, IL1B, ALOX5AP, TLR7, TRIM38, PIK3AP1, TRIB1, S100A8, ADA	324	721	16792	2.51588	0.00690349	5.05651e-05	4.61058e-05
GOTERM_BP_ALL	GO:0042113~B cell activation	19	5.44413	1.39028e-06	SASH3, HDAC5, XBP1, SYK, PRKCD, PRDM1, ZFP36L2, MSH6, LFNG, ADGRG3, IGLL5, ADAM17, LGALS1, BCL6, ID2, BLNK, PTPN6, IL7R, ADA	324	246	16792	4.00291	0.0069908	5.08359e-05	4.63527e-05
GOTERM_BP_ALL	GO:0071216~cellular response to biotic stimulus	16	4.58453	1.50302e-06	CX3CR1, SCARB1, HDAC5, XBP1, SYK, LILRB2, PRDM1, TNFRSF1B, HCK, IRAK2, IL1B, RARA, IRF8, NLRP3, CD14, TRIB1	324	175	16792	4.73848	0.00755556	5.45629e-05	4.97511e-05
GOTERM_BP_ALL	GO:0010557~positive regulation of macromolecule biosynthetic process	59	16.9054	1.53418e-06	SPI1, MAML2, ELL, CHD7, ARHGEF10L, HMGB1, ETS1, IRF2BPL, ELK3, TRIM28, MYC, UBTF, CCNL1, JUNB, SYK, RFC2, SLC11A1, MSGN1, TFEB, RHOG, FOS, ETV6, TNFRSF1A, TBL1XR1, IRF1, IL1B, RARA, IRF8, TLR7, MZF1, IFNAR1, HDAC5, AKNA, INSIG1, NLRC5, LRP5, ADRB2, ACVR1B, AURKB, SLC9A1, RXRA, NLRP3, HIVEP3, POLR2J, BCL9L, XBP1, SMAD3, BCL11A, INSR, OSM, SMAD6, ACVR2A, FOSL2, NLRP12, ID2, AGO2, SNAI1, TNFSF8, LPI…	324	1597	16792	1.91472	0.0077116	5.52963e-05	5.04198e-05
GOTERM_BP_ALL	GO:0022409~positive regulation of cell-cell adhesion	19	5.44413	1.55278e-06	SASH3, XBP1, SYK, HMGB1, LILRB2, RASAL3, ETS1, TGFBR2, HLA-E, LGALS1, HLX, IL1B, FLOT1, RARA, NLRP3, PTPN6, IL7R, CD44, ADA	324	248	16792	3.97063	0.00780473	5.55698e-05	5.06692e-05
GOTERM_BP_ALL	GO:0010648~negative regulation of cell communication	48	13.7536	1.60085e-06	CX3CR1, LRP1, NXN, NLRC5, LRRC4, ADRB2, PTTG1IP, PRDM1, RASAL3, PHB2, HERPUD1, ADGRG3, LFNG, SPRED1, ZNRF3, UBASH3B, CNR2, MYC, PMEPA1, NLRP3, CD14, CHAC1, BCL9L, XBP1, EGFL7, SMAD3, DUSP1, PRKCD, OSM, SMAD6, DUSP6, TGFBR2, PTPRE, NLRP12, ADAM17, BCL6, IL1B, DDIT4, PXDN, TMBIM1, MYADM, SNAI1, PDCD4, PTPN6, PIK3AP1, TRIB1, CD44, ADA	324	1182	16792	2.10466	0.00804535	5.68865e-05	5.18698e-05
GOTERM_BP_ALL	GO:0009891~positive regulation of biosynthetic process	63	18.0516	1.70656e-06	SCARB1, SPI1, MAML2, ELL, CHD7, ARHGEF10L, HMGB1, ETS1, IRF2BPL, ELK3, TRIM28, MYC, UBTF, CCNL1, JUNB, CAP1, SYK, RFC2, SLC11A1, PRKCD, MSGN1, TFEB, RHOG, FOS, ETV6, TNFRSF1A, TBL1XR1, IRF1, IL1B, RARA, IRF8, TLR7, MZF1, IFNAR1, HDAC5, AKNA, INSIG1, NLRC5, LRP5, ADRB2, ACVR1B, AURKB, SLC9A1, RXRA, NLRP3, HIVEP3, POLR2J, BCL9L, XBP1, SMAD3, BCL11A, INSR, OSM, SMAD6, ACVR2A, FOSL2, NLRP12, ID2, AGO…	324	1760	16792	1.85518	0.00857434	6.02189e-05	5.49083e-05
GOTERM_BP_ALL	GO:0023057~negative regulation of signaling	48	13.7536	1.73007e-06	CX3CR1, LRP1, NXN, NLRC5, LRRC4, ADRB2, PTTG1IP, PRDM1, RASAL3, PHB2, HERPUD1, ADGRG3, LFNG, SPRED1, ZNRF3, UBASH3B, CNR2, MYC, PMEPA1, NLRP3, CD14, CHAC1, BCL9L, XBP1, EGFL7, SMAD3, DUSP1, PRKCD, OSM, SMAD6, DUSP6, TGFBR2, PTPRE, NLRP12, ADAM17, BCL6, IL1B, DDIT4, PXDN, TMBIM1, MYADM, SNAI1, PDCD4, PTPN6, PIK3AP1, TRIB1, CD44, ADA	324	1186	16792	2.09756	0.00869195	6.06245e-05	5.52782e-05
GOTERM_BP_ALL	GO:2000026~regulation of multicellular organismal development	62	17.765	1.74559e-06	SPI1, CSF1, CHD7, HMGB1, PRDM1, ETS1, PHB2, LFNG, PREX1, LGALS1, UBASH3B, MYC, FLOT1, KLF10, SRGN, ZHX2, SYK, FOS, DUSP6, TGFBR2, TNFRSF1A, MSH6, IRF1, IL1B, MYADM, RARA, FAM20C, TRIB1, DBN1, ANAPC2, SASH3, CX3CR1, HDAC5, LRP1, ASAP1, RETN, ADRB2, ACVR1B, IQGAP3, ZFP36L2, ZNRF3, RXRA, HLX, NLRP3, ZBTB7B, BCL9L, CCR1, XBP1, SMAD3, BCL11A, FBXO38, INSR, FN1, LILRB2, ACVR2A, BCL6, ID2, SNAI1, PTPN6,…	324	1721	16792	1.8671	0.00876955	6.07464e-05	5.53892e-05
GOTERM_BP_ALL	GO:0071219~cellular response to molecule of bacterial origin	15	4.29799	1.8103e-06	CX3CR1, SCARB1, HDAC5, XBP1, LILRB2, PRDM1, TNFRSF1B, HCK, IRAK2, IL1B, RARA, IRF8, NLRP3, CD14, TRIB1	324	155	16792	5.01553	0.00909321	6.25671e-05	5.70494e-05
GOTERM_BP_ALL	GO:0002683~negative regulation of immune system process	24	6.87679	1.91589e-06	LST1, NLRC5, HMGB1, LILRB2, PRDM1, HLA-E, BCR, CNR2, BCL6, UBASH3B, HLX, MYC, ID2, IRF1, RARA, PTPN6, CD14, TRIM38, VSIG4, PIK3AP1, TRIB1, IL7R, ADA, PAG1	324	388	16792	3.2058	0.00962103	6.5766e-05	5.99662e-05
GOTERM_BP_ALL	GO:0044763~single-organism cellular process	272	77.937	1.94169e-06	SPI1, ANKLE1, CERK, MAML2, LST1, SMC6, ENO2, PHB2, ELK3, PREX1, ALCAM, LGALS1, RASSF3, TRIM28, UBASH3B, RASSF4, MYC, FTH1, FAM65B, VSIG4, CHAC1, RPS11, CCNL1, JUNB, EPHB4, MECR, ACSL1, SLC11A1, PRKCD, CACNA2D4, UPB1, HLA-E, BCR, KATNAL1, BIN2, DDIT4, RIN3, ATP6V0D1, TRIB1, TTYH1, PTTG1IP, IQGAP3, PGS1, INPP5A, KCNMB1, S100A12, HIVEP3, CD14, ZBTB7B, PAG1, ATP6V1C1, CCR1, VASP, HEXIM1, CDT1, XBP1, …	324	12256	16792	1.15021	0.00974993	6.62011e-05	6.03629e-05
GOTERM_BP_ALL	GO:0031328~positive regulation of cellular biosynthetic process	62	17.765	2.0059e-06	SCARB1, SPI1, MAML2, ELL, CHD7, ARHGEF10L, HMGB1, ETS1, IRF2BPL, ELK3, TRIM28, MYC, UBTF, CCNL1, JUNB, CAP1, SYK, RFC2, SLC11A1, PRKCD, MSGN1, TFEB, RHOG, FOS, ETV6, TNFRSF1A, TBL1XR1, IRF1, IL1B, RARA, IRF8, TLR7, MZF1, IFNAR1, HDAC5, AKNA, INSIG1, NLRC5, LRP5, ADRB2, ACVR1B, AURKB, SLC9A1, RXRA, NLRP3, HIVEP3, POLR2J, BCL9L, XBP1, SMAD3, BCL11A, INSR, OSM, SMAD6, ACVR2A, FOSL2, ID2, AGO2, SNAI1…	324	1729	16792	1.85846	0.0100708	6.79315e-05	6.19407e-05
GOTERM_BP_ALL	GO:0045087~innate immune response	38	10.8883	2.05475e-06	BLK, CSF1, CCL4L2, CCL3L3, NLRC5, HMGB1, PRDM1, LYST, LILRA5, PSTPIP1, TRIM28, IRAK2, MYC, FLOT1, S100A12, NLRP3, CD14, VSIG4, CTSB, SYK, SLC11A1, TUBB, PRKCD, TUBB4B, HLA-E, IGLL5, HCK, IRF1, IRF8, CD300E, PTPN6, TLR7, PTX3, TRIM38, PIK3AP1, CD44, S100A8, IFNAR1	324	836	16792	2.35578	0.0103147	6.91219e-05	6.30261e-05
GOTERM_BP_ALL	GO:0032270~positive regulation of cellular protein metabolic process	54	15.4728	2.11553e-06	SLC27A1, HIP1, CSF1, CCL4L2, RNF19B, HMGB1, PHB2, HERPUD1, CCND3, MYC, PIM1, FLOT1, CCNL1, IL6R, SYK, ACSL1, SLC11A1, PRKCD, GAB1, TNFRSF1B, DUSP6, TGFBR2, TNFRSF1A, RNF144A, ADAM17, IL1B, MYH9, LCP2, TRIB1, S100A8, CD44, ANAPC2, CCL3L3, ADRB2, PTTG1IP, ACVR1B, IQGAP3, RXRA, IRAK2, PSAP, S100A12, NLRP3, CCR1, XBP1, SMAD3, INSR, OSM, FN1, MSN, ACVR2A, NLRP12, BCL6, LTBR, FBXL5	324	1420	16792	1.97089	0.0106182	7.06952e-05	6.44607e-05
GOTERM_BP_ALL	GO:0071345~cellular response to cytokine stimulus	34	9.74212	2.3995e-06	CX3CR1, SLC27A1, CSF1, CCL4L2, CCL3L3, NLRC5, LRRC4, ZFP36L2, IRAK2, MYC, IL6R, CCR1, XBP1, SYK, ACSL1, PRKCD, OSM, GAB1, TNFRSF1B, TNFRSF1A, HLA-E, HCK, NLRP12, ADAM17, IRF1, IL1B, PXDN, IRF8, PTPN6, LTBR, TRIM38, IL7R, CD44, IFNAR1	324	706	16792	2.49593	0.0120349	7.96573e-05	7.26324e-05
GOTERM_BP_ALL	GO:0050866~negative regulation of cell activation	15	4.29799	2.45194e-06	LST1, PRKCD, HMGB1, LILRB2, PRDM1, BCR, CNR2, BCL6, UBASH3B, HLX, ID2, IRF1, PTPN6, VSIG4, PAG1	324	159	16792	4.88935	0.0122963	8.0866e-05	7.37345e-05
GOTERM_BP_ALL	GO:0048513~animal organ development	95	27.2206	2.65573e-06	DDR1, BTG2, SPI1, CSF1, NAB2, CHD7, HMGB1, PRDM1, ETS1, PHB2, LFNG, PREX1, PPP3CC, LGALS1, TRIM28, UBASH3B, MYC, BLNK, FLOT1, FAM65B, JUNB, IL6R, EPHB4, CTSB, KLF10, SRGN, SYK, GLRX5, TFEB, GAB1, ARID5B, TFIP11, TTC7A, FOS, TGFBR2, ETV6, BCR, ADAM17, TBL1XR1, IRF1, DDIT4, RARA, FAM20C, MYH9, IRF8, LCP1, ATP6V0D1, TRIB1, CD44, SASH3, CX3CR1, HDAC5, LRP1, INSIG1, LRP5, RETN, ADRB2, ACVR1B, IQGAP3, …	324	3129	16792	1.57353	0.0133114	8.70183e-05	7.93442e-05
GOTERM_BP_ALL	GO:0051247~positive regulation of protein metabolic process	56	16.0458	2.69417e-06	SLC27A1, HIP1, CSF1, CCL4L2, RNF19B, HMGB1, PHB2, HERPUD1, CCND3, MYC, PIM1, FLOT1, CCNL1, IL6R, SYK, ACSL1, SLC11A1, PRKCD, GAB1, TNFRSF1B, DUSP6, TGFBR2, TNFRSF1A, RNF144A, ADAM17, IRF1, IL1B, MYH9, TLR7, LCP2, TRIB1, S100A8, CD44, ANAPC2, CCL3L3, ADRB2, PTTG1IP, ACVR1B, IQGAP3, RXRA, IRAK2, PSAP, S100A12, NLRP3, CCR1, XBP1, SMAD3, INSR, OSM, FN1, MSN, ACVR2A, NLRP12, BCL6, LTBR, FBXL5	324	1508	16792	1.92462	0.0135028	8.77084e-05	7.99735e-05
GOTERM_BP_ALL	GO:0097190~apoptotic signaling pathway	30	8.59599	3.05051e-06	CX3CR1, HIP1, PTTG1IP, ACVR1B, HERPUD1, PPP3CC, ZMAT3, NACC2, E2F2, BMF, CD14, CHAC1, IL6R, SRGN, XBP1, SMAD3, PRKCD, OSM, PPP2R5C, TNFRSF1B, TNFRSF1A, PPP1CA, MSH6, IL1B, DDIT4, TMBIM1, SNAI1, LTBR, CD44, S100A8	324	583	16792	2.66692	0.015275	9.86722e-05	8.99705e-05
GOTERM_BP_ALL	GO:0010647~positive regulation of cell communication	57	16.3324	3.12008e-06	HIP1, CSF1, CCL4L2, HMGB1, PHB2, LFNG, SPRED1, PPP3CC, LGALS1, BLNK, FLOT1, IL6R, SYK, PRKCD, GAB1, TNFRSF1B, DUSP6, TNFRSF1A, HSH2D, ADAM17, IL1B, TLR7, S100A8, CD44, BLK, CX3CR1, CCL3L3, NLRC5, SLC1A3, RETN, ADRB2, ACVR1B, IQGAP3, SLC9A1, IRAK2, NACC2, PSAP, SH3BP2, S100A12, BMF, SH2B3, PAG1, CCR1, HEXIM1, XBP1, SMAD3, CMTM3, INSR, OSM, ACVR2A, PPP1CA, NLRP12, PTPN6, LTBR, TRIM38, PIK3AP1, ADA	324	1555	16792	1.89977	0.0156207	9.97056e-05	9.09127e-05
GOTERM_BP_ALL	GO:0051251~positive regulation of lymphocyte activation	20	5.73066	3.12197e-06	SASH3, XBP1, SYK, HMGB1, LILRB2, PRDM1, RASAL3, TGFBR2, HLA-E, MSH6, IGLL5, LGALS1, BCL6, HLX, IL1B, RARA, NLRP3, PTPN6, IL7R, ADA	324	287	16792	3.61165	0.0156301	9.97056e-05	9.09127e-05
GOTERM_BP_ALL	GO:0030099~myeloid cell differentiation	22	6.30372	3.25983e-06	CCR1, KLF10, SPI1, CSF1, HMGB1, FOS, ACVR1B, ETS1, ACVR2A, TGFBR2, BCL6, UBASH3B, MYC, ID2, RARA, IRF8, FAM20C, MYH9, PTPN6, LTBR, TRIB1, JUNB	324	343	16792	3.32419	0.0163146	0.000102963	9.38827e-05
GOTERM_BP_ALL	GO:0006357~regulation of transcription from RNA polymerase II promoter	64	18.3381	3.26478e-06	BTG2, SPI1, MAML2, ELL, CHD7, ATN1, ARHGEF10L, HMGB1, PRDM1, ETS1, IRF2BPL, ELK3, TRIM28, MYC, NFKBIZ, CCNL1, JUNB, KLF10, ZHX2, SLC11A1, USP3, MSGN1, TFEB, ARID5B, FOS, ETV6, TNFRSF1A, TBL1XR1, IRF1, IL1B, RARA, IRF8, MZF1, HDAC5, AKNA, INSIG1, NLRC5, LRP5, ADRB2, ACVR1B, AURKB, SLC9A1, RXRA, NACC2, CREG1, NLRP3, BCL9L, HEXIM1, XBP1, SMAD3, BCL11A, OSM, SMAD6, ACVR2A, FOSL2, TARBP1, BCL6, ID2, A…	324	1835	16792	1.8076	0.0163391	0.000102963	9.38827e-05
GOTERM_BP_ALL	GO:0045621~positive regulation of lymphocyte differentiation	11	3.15186	3.38357e-06	SASH3, XBP1, SYK, HLX, RARA, NLRP3, LILRB2, PRDM1, IL7R, ADA, TGFBR2	324	81	16792	7.03826	0.0169286	0.000106047	9.66944e-05
GOTERM_BP_ALL	GO:0023056~positive regulation of signaling	57	16.3324	3.64581e-06	HIP1, CSF1, CCL4L2, HMGB1, PHB2, LFNG, SPRED1, PPP3CC, LGALS1, BLNK, FLOT1, IL6R, SYK, PRKCD, GAB1, TNFRSF1B, DUSP6, TNFRSF1A, HSH2D, ADAM17, IL1B, TLR7, S100A8, CD44, BLK, CX3CR1, CCL3L3, NLRC5, SLC1A3, RETN, ADRB2, ACVR1B, IQGAP3, SLC9A1, IRAK2, NACC2, PSAP, SH3BP2, S100A12, BMF, SH2B3, PAG1, CCR1, HEXIM1, XBP1, SMAD3, CMTM3, INSR, OSM, ACVR2A, PPP1CA, NLRP12, PTPN6, LTBR, TRIM38, PIK3AP1, ADA	324	1563	16792	1.89005	0.0182286	0.00011356	0.000103546
GOTERM_BP_ALL	GO:0032943~mononuclear cell proliferation	19	5.44413	3.97499e-06	SASH3, SYK, CSF1, SLC11A1, LST1, PRKCD, HMGB1, LILRB2, PRDM1, RASAL3, HLA-E, CCND3, BCL6, IL1B, IRF1, PTPN6, VSIG4, IL7R, ADA	324	265	16792	3.71591	0.019858	0.000123054	0.000112202
GOTERM_BP_ALL	GO:0051173~positive regulation of nitrogen compound metabolic process	62	17.765	4.09286e-06	BTG2, SPI1, MAML2, ELL, CHD7, ARHGEF10L, HMGB1, ETS1, IRF2BPL, ELK3, TRIM28, MYC, UBTF, CCNL1, JUNB, CAP1, RFC2, SLC11A1, PRKCD, MSGN1, TFEB, RHOG, FOS, ETV6, TNFRSF1A, MSH6, TBL1XR1, IRF1, IL1B, RARA, IRF8, MZF1, IFNAR1, HDAC5, AKNA, INSIG1, NLRC5, LRP5, ADRB2, ACVR1B, ZFP36L2, AURKB, SLC9A1, RXRA, NLRP3, HIVEP3, POLR2J, BCL9L, XBP1, SMAD3, BCL11A, INSR, OSM, SMAD6, ACVR2A, FOSL2, ID2, AGO2, SNA…	324	1767	16792	1.8185	0.0204408	0.00012593	0.000114825
GOTERM_BP_ALL	GO:0016310~phosphorylation	73	20.9169	5.04416e-06	DDR1, SLC27A1, CERK, CSF1, CCL4L2, LRRC4, HMGB1, ENO2, PHB2, NADK2, CCND3, SPRED1, TRIM28, UBASH3B, MYC, PIM1, FLOT1, PMEPA1, TK2, CCNL1, IL6R, EPHB4, RPS6KL1, SYK, ACSL1, DUSP1, SLC11A1, PRKCD, GAB1, TNFRSF1B, DUSP6, TGFBR2, TNFRSF1A, BCR, HCK, ADAM17, IL1B, DDIT4, MYADM, RARA, FAM20C, TLR7, LCP2, TRIB1, CD44, IFNAR1, BLK, PXK, CCL3L3, NLRC5, LRP5, ADRB2, RASAL3, ACVR1B, IQGAP3, ZFP36L2, AURKB, …	324	2229	16792	1.69735	0.0251317	0.00015426	0.000140656
GOTERM_BP_ALL	GO:0050764~regulation of phagocytosis	10	2.86533	5.17408e-06	BLK, BCR, SCARB1, HCK, SYK, IL1B, SLC11A1, MYO18A, PTX3, HMGB1	324	67	16792	7.7354	0.0257706	0.00015728	0.000143409
GOTERM_BP_ALL	GO:0009967~positive regulation of signal transduction	53	15.1862	5.46477e-06	HIP1, CSF1, CCL4L2, HMGB1, PHB2, LFNG, SPRED1, PPP3CC, LGALS1, BLNK, FLOT1, IL6R, SYK, PRKCD, GAB1, TNFRSF1B, DUSP6, TNFRSF1A, HSH2D, ADAM17, IL1B, TLR7, S100A8, CD44, CCL3L3, NLRC5, ADRB2, ACVR1B, IQGAP3, SLC9A1, IRAK2, NACC2, PSAP, SH3BP2, S100A12, BMF, SH2B3, PAG1, CCR1, HEXIM1, XBP1, SMAD3, CMTM3, INSR, OSM, ACVR2A, PPP1CA, NLRP12, PTPN6, LTBR, TRIM38, PIK3AP1, ADA	324	1428	16792	1.92356	0.0271986	0.000165121	0.000150559
GOTERM_BP_ALL	GO:0051094~positive regulation of developmental process	44	12.6074	5.58926e-06	SASH3, CX3CR1, CSF1, CHD7, HMGB1, RETN, ADRB2, PRDM1, ACVR1B, ETS1, IQGAP3, TRIOBP, PREX1, LGALS1, HLX, MYC, FLOT1, NLRP3, BCL9L, CCR1, KLF10, XBP1, SMAD3, SYK, BCL11A, FBXO38, INSR, FN1, LILRB2, FOS, ACVR2A, TGFBR2, MSH6, BCL6, ID2, IL1B, MYADM, SNAI1, RARA, FAM20C, TRIB1, IL7R, ADA, ANAPC2	324	1089	16792	2.09403	0.0278095	0.000167877	0.000153072
GOTERM_BP_ALL	GO:0031331~positive regulation of cellular catabolic process	19	5.44413	5.71025e-06	XBP1, BTG2, INSR, PRKCD, RNF19B, MSN, HMGB1, PTTG1IP, ADRB2, TNFRSF1B, ZFP36L2, HERPUD1, RNF144A, MYC, IL1B, AGO2, TRIB1, FBXL5, ANAPC2	324	272	16792	3.62028	0.0284028	0.000170496	0.000155461
GOTERM_BP_ALL	GO:0042127~regulation of cell proliferation	56	16.0458	6.23824e-06	DDR1, BTG2, CSF1, LST1, HMGB1, PRDM1, ETS1, PHB2, PLAU, MYC, FTH1, VSIG4, JUNB, IL6R, KLF10, EGFL7, SYK, RHOG, PPP2R5C, TNFRSF1B, TGFBR2, HLA-E, TNFRSF1A, HCK, ADAM17, IRF1, IL1B, S100A6, RARA, TRIB1, BLK, SASH3, CX3CR1, CCL3L3, LRP5, RETN, RASAL3, IQGAP3, HLX, NACC2, RBM38, XBP1, SMAD3, INSR, OSM, FN1, LILRB2, SMAD6, TPD52L2, FOSL2, BCL6, ID2, PTPN6, LTBR, PLCD3, ADA	324	1552	16792	1.87005	0.030988	0.000185166	0.000168836
GOTERM_BP_ALL	GO:0045582~positive regulation of T cell differentiation	10	2.86533	6.63062e-06	SASH3, XBP1, SYK, HLX, RARA, NLRP3, LILRB2, IL7R, ADA, TGFBR2	324	69	16792	7.51118	0.0329047	0.000195661	0.000178406
GOTERM_BP_ALL	GO:0002819~regulation of adaptive immune response	13	3.72493	6.75975e-06	SASH3, SLC11A1, HMGB1, HLA-E, MSH6, BCL6, HLX, IL1B, IRF1, NLRP3, PTPN6, IL7R, ADA	324	128	16792	5.2637	0.0335346	0.000198312	0.000180823
GOTERM_BP_ALL	GO:0046635~positive regulation of alpha-beta T cell activation	9	2.5788	7.17162e-06	SASH3, SYK, HLX, RARA, NLRP3, RASAL3, ADA, TGFBR2, HLA-E	324	53	16792	8.80084	0.0355412	0.000209179	0.000190732
GOTERM_BP_ALL	GO:0006909~phagocytosis	19	5.44413	7.35514e-06	SCARB1, SYK, LRP1, CD93, SLC11A1, PRKCD, HMGB1, BCR, IGLL5, HCK, RAB20, BIN2, IL1B, MYO18A, RARA, IRF8, MYH9, PTX3, CD14	324	277	16792	3.55493	0.0364339	0.000213299	0.000194488
GOTERM_BP_ALL	GO:0060326~cell chemotaxis	18	5.15759	7.67326e-06	CCR1, CX3CR1, SYK, CSF1, CCL3L3, CCL4L2, PRKCD, RHOG, HMGB1, LYST, PREX1, ADAM17, BIN2, CNR2, IL1B, S100A12, IL6R, S100A8	324	251	16792	3.71669	0.0379794	0.000221253	0.000201741
GOTERM_BP_ALL	GO:0051246~regulation of protein metabolic process	79	22.6361	7.95364e-06	BTG2, SLC27A1, HIP1, SPI1, CSF1, CCL4L2, LRRC4, RNF19B, HMGB1, PHB2, HERPUD1, CCND3, SPRED1, UBASH3B, MYC, PIM1, FLOT1, PMEPA1, CHAC1, CCNL1, IL6R, SYK, ACSL1, DUSP1, SLC11A1, PRKCD, GAB1, TNFRSF1B, DUSP6, TGFBR2, TNFRSF1A, RNF144A, ADAM17, IRF1, IL1B, DDIT4, MYADM, RARA, MYH9, TLR7, LCP2, TRIB1, S100A8, CD44, ANAPC2, IFNAR1, HDAC5, NXN, CCL3L3, LRP5, ADRB2, PTTG1IP, ACVR1B, IQGAP3, ZFP36L2, RXRA…	324	2512	16792	1.62991	0.0393395	0.000228034	0.000207924
GOTERM_BP_ALL	GO:0070661~leukocyte proliferation	19	5.44413	8.53833e-06	SASH3, SYK, CSF1, SLC11A1, LST1, PRKCD, HMGB1, LILRB2, PRDM1, RASAL3, HLA-E, CCND3, BCL6, IL1B, IRF1, PTPN6, VSIG4, IL7R, ADA	324	280	16792	3.51684	0.0421697	0.000243415	0.000221948
GOTERM_BP_ALL	GO:0031348~negative regulation of defense response	14	4.01146	8.91326e-06	CX3CR1, SMAD3, PRKCD, NLRC5, TNFRSF1B, ETS1, TNFRSF1A, HLA-E, BCR, NLRP12, CNR2, NLRP3, TRIM38, ADA	324	154	16792	4.71156	0.04398	0.000252676	0.000230393
GOTERM_BP_ALL	GO:0002696~positive regulation of leukocyte activation	20	5.73066	9.94092e-06	SASH3, XBP1, SYK, HMGB1, LILRB2, PRDM1, RASAL3, TGFBR2, HLA-E, MSH6, IGLL5, LGALS1, BCL6, HLX, IL1B, RARA, NLRP3, PTPN6, IL7R, ADA	324	311	16792	3.33294	0.0489248	0.000280234	0.000255521

## Sheet: SUPER.EK72
Category	Term	Count	%	PValue	Genes	List Total	Pop Hits	Pop Total	Fold Enrichment	Bonferroni	Benjamini	FDR
GOTERM_BP_ALL	GO:0002376~immune system process	101	34.9481	5.60791e-21	SPI1, CCL4L2, RNF19B, IL1RAP, RBPJ, ETS1, PHB2, PREX1, ALCAM, TRIM28, UBASH3B, FCGRT, MYC, FTH1, SIRPA, VSIG4, JUNB, BNIP3L, IL4R, SLC11A1, HLA-E, ADAM17, DDIT4, CD300E, TRIB1, IL6ST, S100A8, IFNAR1, BLK, CCL3L3, RASAL3, ZFP36L2, IRAK2, S100A12, MBP, CD14, CD300LF, ZBTB7B, PAG1, CCR1, FN1, MSN, BCL6, ID2, BCL3, TAB2, TNFSF8, ADA, CD22, PICALM, SIGLEC9, LYST, FLOT1, CTSB, KLF10, SYK, GLRX5, TUBB, …	265	2465	16792	2.59634	2.62058e-17	2.62058e-17	2.40299e-17
GOTERM_BP_ALL	GO:0006955~immune response	70	24.2215	7.46986e-16	CCL4L2, RNF19B, IL1RAP, RBPJ, ETS1, PHB2, LYST, ALCAM, TRIM28, FCGRT, MYC, FTH1, FLOT1, VSIG4, CTSB, IL4R, SYK, SLC11A1, TUBB, FOS, TNFRSF1B, HLA-E, TNFRSF1A, APBB1IP, HCK, ADAM17, IRF1, IL1B, RARA, IRF8, CD300E, TLR7, LCP1, IL6ST, S100A8, CD44, IFNAR1, BLK, PTGER4, CX3CR1, CCL3L3, PTAFR, FYB, LILRA5, RNF135, CNR2, HLX, IRAK2, S100A12, MBP, CD14, PAG1, LAIR1, CCR1, MAP3K1, CMTM3, OSM, LILRB2, THE…	265	1551	16792	2.85985	3.63165e-12	1.74533e-12	1.60042e-12
GOTERM_BP_ALL	GO:0048518~positive regulation of biological process	144	49.827	1.26464e-14	SCARB1, SLC27A1, SPI1, MAML2, CCL4L2, RNF19B, IL1RAP, HNMT, RBPJ, BACH1, ETS1, PHB2, PREX1, TRIM28, MYC, PIM1, VSIG4, CCNL1, JUNB, SH3GLB1, BNIP3L, IL4R, ACSL1, SLC11A1, LMO2, ARID5B, HLA-E, ADAM17, TBL1XR1, DDIT4, MYADM, S100A6, GSAP, MZF1, TRIB1, IL6ST, S100A8, IFNAR1, BLK, AKNA, CCL3L3, ADRB2, RASAL3, ZFP36L2, IRAK2, ZMAT3, NACC2, PSAP, S100A12, BMF, HIVEP3, CD14, ZBTB7B, PAG1, BCL9L, HEXIM1, …	265	5285	16792	1.72653	5.9144e-11	1.96988e-11	1.80633e-11
GOTERM_BP_ALL	GO:0048522~positive regulation of cellular process	133	46.0208	4.63836e-14	SCARB1, SLC27A1, SPI1, MAML2, CCL4L2, RNF19B, IL1RAP, HNMT, RBPJ, BACH1, ETS1, PHB2, PREX1, TRIM28, MYC, PIM1, CCNL1, JUNB, SH3GLB1, BNIP3L, IL4R, ACSL1, SLC11A1, LMO2, HLA-E, ADAM17, TBL1XR1, DDIT4, MYADM, S100A6, GSAP, MZF1, TRIB1, IL6ST, S100A8, IFNAR1, BLK, AKNA, CCL3L3, ADRB2, RASAL3, ZFP36L2, IRAK2, ZMAT3, NACC2, PSAP, S100A12, BMF, HIVEP3, CD14, PAG1, BCL9L, HEXIM1, CCR1, VASP, ZFHX3, FBXO…	265	4744	16792	1.77649	2.16861e-10	5.41876e-11	4.96884e-11
GOTERM_BP_ALL	GO:0048583~regulation of response to stimulus	110	38.0623	3.70376e-13	CCL4L2, RBPJ, ETS1, PHB2, PREX1, TRIM28, UBASH3B, FCGRT, MYC, VSIG4, SH3GLB1, IL4R, SLC11A1, HLA-E, ARHGAP45, ADAM17, DDIT4, MYADM, CD300E, TRIB1, IL6ST, S100A8, IFNAR1, BLK, CCL3L3, ADRB2, RASAL3, RHOBTB1, IRAK2, NACC2, PSAP, S100A12, BMF, CD14, CD300LF, PAG1, BCL9L, HEXIM1, CCR1, FN1, ARHGAP26, ARHGAP25, RCAN1, PTPRE, BCL6, BCL3, TAB2, ADA, SIGLEC9, ARHGEF10L, SPRED1, PPP3CC, PSD4, TAGAP, UBTF,…	265	3636	16792	1.91701	1.73074e-09	3.46154e-10	3.17413e-10
GOTERM_BP_ALL	GO:0006952~defense response	63	21.7993	1.44609e-12	SERPINA1, CCL4L2, IL1RAP, RBPJ, ETS1, PHB2, LYST, TRIM28, MYC, NFKBIZ, FLOT1, VSIG4, CTSB, BNIP3L, IL4R, SYK, SLC11A1, TUBB, FOS, TNFRSF1B, HLA-E, TNFRSF1A, HCK, ADAM17, IRF1, IL1B, DDIT4, IRF8, CD300E, TLR7, IL6ST, S100A8, CD44, IFNAR1, BLK, PTGER4, CX3CR1, CCL3L3, PTAFR, LILRA5, RNF135, CNR2, IRAK2, S100A12, CD14, CCR1, MAP3K1, OSM, FN1, LILRB2, NLRP12, THEMIS2, BCL6, BCL3, ALOX5AP, PTPN6, PTX3…	265	1518	16792	2.62982	6.75746e-09	1.12626e-09	1.03275e-09
GOTERM_BP_ALL	GO:0007159~leukocyte cell-cell adhesion	34	11.7647	1.88327e-12	PTGER4, PTAFR, RASAL3, ETS1, ZFP36L2, PREX1, HLX, VSIG4, ZBTB7B, PAG1, IL4R, SYK, SLC11A1, MSN, LILRB2, TGFBR2, HLA-E, APBB1IP, HSH2D, ADAM17, BCL6, IRF1, IL1B, BCL3, RARA, MYH9, PTPN6, TNFSF8, LCP1, IL6ST, CD44, S100A8, ADA, IFNAR1	265	491	16792	4.38787	8.80053e-09	1.25722e-09	1.15283e-09
GOTERM_BP_ALL	GO:0030097~hemopoiesis	41	14.1869	6.89928e-12	PTGER4, RBM47, SPI1, RBPJ, ETS1, ZFP36L2, PREX1, UBASH3B, HLX, MYC, ZBTB7B, JUNB, SH2B3, CCR1, KLF10, IL4R, SYK, GLRX5, TET2, LILRB2, FOS, SOD2, ACVR2A, TGFBR2, VEGFA, ADAM17, KLF6, BCL6, ID2, IRF1, BCL3, RARA, IRF8, FAM20C, MYH9, PTPN6, TNFSF8, LTBR, TRIB1, ADA, PICALM	265	739	16792	3.51557	3.22402e-08	4.03004e-09	3.69543e-09
GOTERM_BP_ALL	GO:0002521~leukocyte differentiation	32	11.0727	1.87305e-11	PTGER4, SPI1, RBPJ, ZFP36L2, PREX1, UBASH3B, HLX, MYC, ZBTB7B, JUNB, CCR1, KLF10, IL4R, SYK, LILRB2, FOS, TGFBR2, VEGFA, ADAM17, KLF6, BCL6, ID2, IRF1, BCL3, RARA, FAM20C, MYH9, PTPN6, TNFSF8, LTBR, TRIB1, ADA	265	474	16792	4.27788	8.7528e-08	9.7253e-09	8.91781e-09
GOTERM_BP_ALL	GO:0002682~regulation of immune system process	57	19.7232	2.80501e-11	SPI1, SIGLEC9, ETS1, PHB2, UBASH3B, FCGRT, MYC, FLOT1, VSIG4, CTSB, KLF10, IL4R, SYK, SLC11A1, FOS, TGFBR2, HLA-E, HCK, ADAM17, IRF1, IL1B, RARA, CD300E, TLR7, TRIB1, IL6ST, IFNAR1, BLK, PTGER4, PTAFR, RASAL3, ZFP36L2, FYB, RNF135, CNR2, HLX, IRAK2, CD14, CD300LF, ZBTB7B, PAG1, LAIR1, CCR1, MAP3K1, CMTM3, MSN, LILRB2, ACVR2A, VEGFA, THEMIS2, BCL6, ID2, PTPN6, TAB2, TRIM38, PIK3AP1, ADA	265	1378	16792	2.62109	1.31078e-07	1.20762e-08	1.10735e-08
GOTERM_BP_ALL	GO:0006950~response to stress	106	36.6782	3.11683e-11	SCARB1, SLC27A1, CCL4L2, IL1RAP, HNMT, RBPJ, BACH1, ETS1, PHB2, TRIM28, UBASH3B, MYC, VSIG4, SH3GLB1, BNIP3L, IL4R, SLC11A1, USP3, SLC30A1, HLA-E, ADAM17, DDIT4, CD300E, ATP6V0D1, TRIB1, IL6ST, S100A8, IFNAR1, BLK, PIF1, CCL3L3, ADRB2, ZFP36L2, IRAK2, ZMAT3, NACC2, PSAP, S100A12, CD14, CCR1, FN1, KIAA0430, BCL6, ID2, BCL3, ID3, TAB2, TNFSF8, ADA, DDR1, BTG2, SERPINA1, CPQ, ARHGEF10L, PTPRK, RCSD1…	265	3677	16792	1.82671	1.45649e-07	1.20762e-08	1.10735e-08
GOTERM_BP_ALL	GO:0070486~leukocyte aggregation	31	10.7266	3.14011e-11	PTGER4, RASAL3, ZFP36L2, PREX1, HLX, VSIG4, ZBTB7B, PAG1, IL4R, SYK, SLC11A1, LILRB2, TGFBR2, HLA-E, APBB1IP, HSH2D, ADAM17, BCL6, IRF1, IL1B, BCL3, RARA, MYH9, PTPN6, TNFSF8, LCP1, IL6ST, CD44, S100A8, ADA, IFNAR1	265	454	16792	4.32676	1.46737e-07	1.20762e-08	1.10735e-08
GOTERM_BP_ALL	GO:0048534~hematopoietic or lymphoid organ development	41	14.1869	3.35951e-11	PTGER4, RBM47, SPI1, RBPJ, ETS1, ZFP36L2, PREX1, UBASH3B, HLX, MYC, ZBTB7B, JUNB, SH2B3, CCR1, KLF10, IL4R, SYK, GLRX5, TET2, LILRB2, FOS, SOD2, ACVR2A, TGFBR2, VEGFA, ADAM17, KLF6, BCL6, ID2, IRF1, BCL3, RARA, IRF8, FAM20C, MYH9, PTPN6, TNFSF8, LTBR, TRIB1, ADA, PICALM	265	778	16792	3.33934	1.5699e-07	1.20762e-08	1.10735e-08
GOTERM_BP_ALL	GO:0050896~response to stimulus	184	63.6678	4.82661e-11	SCARB1, SLC27A1, SPI1, MAML2, CCL4L2, RNF19B, IL1RAP, HNMT, RBPJ, BACH1, ETS1, PHB2, DOCK10, PREX1, ALCAM, TRIM28, RASSF3, UBASH3B, FCGRT, RASSF4, MYC, FTH1, PIM1, VSIG4, JUNB, SH3GLB1, BNIP3L, IL4R, ACSL1, SLC11A1, USP3, LMO2, ARID5B, SLC30A1, CACNA2D4, HLA-E, ARHGAP45, ADAM17, TBL1XR1, DDIT4, MYADM, S100A6, CD300E, RIN3, ATP6V0D1, TRIB1, IL6ST, S100A8, IFNAR1, BLK, PIF1, CCL3L3, ADRB2, RASAL3, …	265	8329	16792	1.39985	2.25547e-07	1.61105e-08	1.47729e-08
GOTERM_BP_ALL	GO:0016337~single organismal cell-cell adhesion	39	13.4948	6.35686e-11	PTGER4, TTYH1, PTAFR, RASAL3, ETS1, ZFP36L2, PREX1, UBASH3B, HLX, FLOT1, VSIG4, ZBTB7B, PAG1, IL4R, SYK, SLC11A1, C10ORF54, MSN, LILRB2, TGFBR2, HLA-E, APBB1IP, HSH2D, ADAM17, BCL6, IRF1, IL1B, BCL3, MYADM, RARA, MYH9, PTPN6, TNFSF8, LCP1, IL6ST, CD44, S100A8, ADA, IFNAR1	265	725	16792	3.40866	2.97056e-07	1.98037e-08	1.81594e-08
GOTERM_BP_ALL	GO:0006954~inflammatory response	36	12.4567	1.09694e-10	PTGER4, CX3CR1, SERPINA1, CCL4L2, CCL3L3, PTAFR, IL1RAP, RBPJ, ETS1, PHB2, CNR2, IRAK2, NFKBIZ, S100A12, CD14, CCR1, IL4R, SYK, SLC11A1, OSM, FN1, FOS, TNFRSF1B, TNFRSF1A, HCK, NLRP12, THEMIS2, BCL6, IL1B, ALOX5AP, TLR7, PTX3, LTBR, IL6ST, S100A8, ADA	265	637	16792	3.58113	5.12599e-07	3.20375e-08	2.93774e-08
GOTERM_BP_ALL	GO:0098602~single organism cell adhesion	40	13.8408	1.33915e-10	PTGER4, TTYH1, PTAFR, RASAL3, ETS1, ZFP36L2, PREX1, UBASH3B, HLX, FLOT1, VSIG4, ZBTB7B, PAG1, IL4R, SYK, SLC11A1, FN1, C10ORF54, MSN, LILRB2, TGFBR2, HLA-E, APBB1IP, HSH2D, ADAM17, BCL6, IRF1, IL1B, BCL3, MYADM, RARA, MYH9, PTPN6, TNFSF8, LCP1, IL6ST, CD44, S100A8, ADA, IFNAR1	265	779	16792	3.25371	6.25786e-07	3.68109e-08	3.37545e-08
GOTERM_BP_ALL	GO:0045321~leukocyte activation	39	13.4948	1.50034e-10	PTGER4, CX3CR1, SPI1, PTAFR, RASAL3, RBPJ, ZFP36L2, PREX1, CNR2, HLX, S100A12, VSIG4, ZBTB7B, PAG1, IL4R, SYK, SLC11A1, LILRB2, TGFBR2, HLA-E, APBB1IP, HSH2D, ADAM17, KLF6, BCL6, ID2, IRF1, IL1B, BCL3, RARA, MYH9, PTPN6, TLR7, TNFSF8, LTBR, LCP1, IL6ST, ADA, IFNAR1	265	747	16792	3.30827	7.01106e-07	3.89504e-08	3.57163e-08
GOTERM_BP_ALL	GO:0002520~immune system development	41	14.1869	1.70208e-10	PTGER4, RBM47, SPI1, RBPJ, ETS1, ZFP36L2, PREX1, UBASH3B, HLX, MYC, ZBTB7B, JUNB, SH2B3, CCR1, KLF10, IL4R, SYK, GLRX5, TET2, LILRB2, FOS, SOD2, ACVR2A, TGFBR2, VEGFA, ADAM17, KLF6, BCL6, ID2, IRF1, BCL3, RARA, IRF8, FAM20C, MYH9, PTPN6, TNFSF8, LTBR, TRIB1, ADA, PICALM	265	821	16792	3.16444	7.95381e-07	4.11894e-08	3.77694e-08
GOTERM_BP_ALL	GO:0065009~regulation of molecular function	88	30.4498	1.76287e-10	SCARB1, DOCK4, SLC27A1, SERPINA1, ELL, CCL4L2, ARHGEF10L, IL1RAP, PHB2, RCBTB2, DOCK10, PREX1, SPRED1, TRIM28, UBASH3B, MYC, PSD4, TAGAP, PIM1, FLOT1, CCNL1, CTSB, SH3GLB1, SYK, ACSL1, DUSP1, RFC2, SLC11A1, RHOG, ARAP2, ARID5B, PPP2R5C, FOS, DUSP6, TGFBR2, ARHGAP45, HCK, ADAM17, IL1B, TMBIM1, RARA, BMP2K, TBC1D24, RIN3, TRIB1, S100A8, CD44, PIF1, LRP1, CCL3L3, PTAFR, GLRX, DENND3, ADRB2, RASAL3, …	265	2863	16792	1.94768	8.23787e-07	4.11894e-08	3.77694e-08
GOTERM_BP_ALL	GO:0010646~regulation of cell communication	91	31.4879	2.04352e-10	CCL4L2, ARHGEF10L, RBPJ, PHB2, PREX1, SPRED1, PPP3CC, UBASH3B, MYC, PSD4, TAGAP, UBTF, FLOT1, PMEPA1, SH3GLB1, EGFL7, SYK, DUSP1, RFC2, RHBDF2, RHOG, ARAP2, SLC30A1, PPP2R5C, TNFRSF1B, DUSP6, TGFBR2, TNFRSF1A, ARHGAP45, HSH2D, ADAM17, IRF1, IL1B, DDIT4, TMBIM1, MYADM, RARA, FAM20C, TLR7, TRIB1, IL6ST, S100A8, CD44, DBN1, IFNAR1, ARF6, BLK, CX3CR1, LRP1, CCL3L3, RETN, ADRB2, RASAL3, RHOBTB1, AURKB…	265	3020	16792	1.90937	9.54937e-07	4.54732e-08	4.16976e-08
GOTERM_BP_ALL	GO:0009966~regulation of signal transduction	85	29.4118	2.2031e-10	CCL4L2, ARHGEF10L, RBPJ, PHB2, PREX1, SPRED1, PPP3CC, UBASH3B, MYC, PSD4, TAGAP, UBTF, FLOT1, PMEPA1, SH3GLB1, EGFL7, SYK, DUSP1, RFC2, RHBDF2, RHOG, ARAP2, PPP2R5C, TNFRSF1B, DUSP6, TGFBR2, TNFRSF1A, ARHGAP45, HSH2D, ADAM17, IRF1, IL1B, DDIT4, TMBIM1, MYADM, FAM20C, TLR7, TRIB1, IL6ST, S100A8, CD44, IFNAR1, ARF6, CX3CR1, LRP1, CCL3L3, ADRB2, RASAL3, RHOBTB1, AURKB, NCLN, IRAK2, NACC2, GNG7, PSAP…	265	2728	16792	1.97438	1.02951e-06	4.67958e-08	4.29103e-08
GOTERM_BP_ALL	GO:0007165~signal transduction	141	48.7889	3.02802e-10	SCARB1, SLC27A1, MAML2, CCL4L2, IL1RAP, RBPJ, PHB2, DOCK10, PREX1, ALCAM, TRIM28, RASSF3, UBASH3B, FCGRT, RASSF4, MYC, PIM1, SH3GLB1, BNIP3L, IL4R, ACSL1, ARID5B, HLA-E, ARHGAP45, ADAM17, TBL1XR1, DDIT4, MYADM, S100A6, RIN3, ATP6V0D1, TRIB1, IL6ST, S100A8, IFNAR1, BLK, CCL3L3, ADRB2, RASAL3, RHOBTB1, ZFP36L2, IRAK2, ZMAT3, NACC2, PSAP, S100A12, BMF, HIVEP3, CD14, PAG1, ATP6V1C1, BCL9L, HEXIM1, CC…	265	5775	16792	1.54712	1.41499e-06	6.15214e-08	5.64133e-08
GOTERM_BP_ALL	GO:0070489~T cell aggregation	29	10.0346	4.81964e-10	PTGER4, RASAL3, ZFP36L2, PREX1, HLX, VSIG4, ZBTB7B, PAG1, IL4R, SYK, SLC11A1, LILRB2, TGFBR2, HLA-E, APBB1IP, HSH2D, ADAM17, BCL6, IRF1, IL1B, BCL3, RARA, MYH9, PTPN6, TNFSF8, LCP1, IL6ST, ADA, IFNAR1	265	446	16792	4.12021	2.25221e-06	8.77568e-08	8.04703e-08
GOTERM_BP_ALL	GO:0042110~T cell activation	29	10.0346	4.81964e-10	PTGER4, RASAL3, ZFP36L2, PREX1, HLX, VSIG4, ZBTB7B, PAG1, IL4R, SYK, SLC11A1, LILRB2, TGFBR2, HLA-E, APBB1IP, HSH2D, ADAM17, BCL6, IRF1, IL1B, BCL3, RARA, MYH9, PTPN6, TNFSF8, LCP1, IL6ST, ADA, IFNAR1	265	446	16792	4.12021	2.25221e-06	8.77568e-08	8.04703e-08
GOTERM_BP_ALL	GO:0023051~regulation of signaling	91	31.4879	4.91273e-10	CCL4L2, ARHGEF10L, RBPJ, PHB2, PREX1, SPRED1, PPP3CC, UBASH3B, MYC, PSD4, TAGAP, UBTF, FLOT1, PMEPA1, SH3GLB1, EGFL7, SYK, DUSP1, RFC2, RHBDF2, RHOG, ARAP2, SLC30A1, PPP2R5C, TNFRSF1B, DUSP6, TGFBR2, TNFRSF1A, ARHGAP45, HSH2D, ADAM17, IRF1, IL1B, DDIT4, TMBIM1, MYADM, RARA, FAM20C, TLR7, TRIB1, IL6ST, S100A8, CD44, DBN1, IFNAR1, ARF6, BLK, CX3CR1, LRP1, CCL3L3, RETN, ADRB2, RASAL3, RHOBTB1, AURKB…	265	3070	16792	1.87828	2.29572e-06	8.77568e-08	8.04703e-08
GOTERM_BP_ALL	GO:0071593~lymphocyte aggregation	29	10.0346	5.07048e-10	PTGER4, RASAL3, ZFP36L2, PREX1, HLX, VSIG4, ZBTB7B, PAG1, IL4R, SYK, SLC11A1, LILRB2, TGFBR2, HLA-E, APBB1IP, HSH2D, ADAM17, BCL6, IRF1, IL1B, BCL3, RARA, MYH9, PTPN6, TNFSF8, LCP1, IL6ST, ADA, IFNAR1	265	447	16792	4.111	2.36943e-06	8.77568e-08	8.04703e-08
GOTERM_BP_ALL	GO:0022610~biological adhesion	62	21.4533	5.44398e-10	DDR1, SCARB1, SIGLEC9, PTPRK, ETS1, PREX1, ALCAM, UBASH3B, FLOT1, SIRPA, VSIG4, SH3GLB1, EGFL7, IL4R, SYK, SLC11A1, C10ORF54, MTSS1, TGFBR2, HLA-E, APBB1IP, HCK, HSH2D, ADAM17, IRF1, IL1B, MYADM, RARA, MYH9, LCP1, IL6ST, S100A8, CD44, DBN1, PLEC, IFNAR1, ARF6, PTGER4, CX3CR1, TTYH1, PTAFR, RASAL3, ZFP36L2, HLX, ZBTB7B, PAG1, CCR1, VASP, MYBPH, FN1, MSN, LILRB2, VEGFA, FMNL2, THEMIS2, BCL6, BCL3, …	265	1705	16792	2.30422	2.54397e-06	9.08561e-08	8.33123e-08
GOTERM_BP_ALL	GO:0009605~response to external stimulus	70	24.2215	6.60572e-10	SCARB1, DOCK4, BTG2, CCL4L2, RBPJ, ETS1, PHB2, LYST, PREX1, ALCAM, UBASH3B, PIM1, JUNB, SH3GLB1, KLF10, BNIP3L, IL4R, SYK, ACSL1, SLC11A1, RHOG, CACNA2D4, FOS, TNFRSF1B, TGFBR2, HLA-E, TNFRSF1A, HCK, ADAM17, TBL1XR1, IRF1, IL1B, DDIT4, RARA, IRF8, TLR7, TRIB1, IL6ST, S100A8, IFNAR1, PTGER4, CX3CR1, CCL3L3, PTAFR, RETN, ADRB2, CNR2, IRAK2, S100A12, CD14, CCR1, VASP, MAP3K1, CMTM3, OSM, LILRB2, SOD…	265	2073	16792	2.13971	3.08685e-06	1.06443e-07	9.76053e-08
GOTERM_BP_ALL	GO:0023052~signaling	148	51.2111	7.31476e-10	SCARB1, SLC27A1, MAML2, CCL4L2, IL1RAP, RBPJ, PHB2, DOCK10, PREX1, ALCAM, TRIM28, RASSF3, UBASH3B, FCGRT, RASSF4, MYC, PIM1, SH3GLB1, BNIP3L, IL4R, ACSL1, ARID5B, SLC30A1, CACNA2D4, HLA-E, ARHGAP45, ADAM17, TBL1XR1, DDIT4, MYADM, S100A6, RIN3, ATP6V0D1, TRIB1, IL6ST, S100A8, IFNAR1, BLK, CCL3L3, ADRB2, RASAL3, RHOBTB1, ZFP36L2, IRAK2, ZMAT3, NACC2, PSAP, S100A12, BMF, MBP, HIVEP3, CD14, PAG1, ATP…	265	6260	16792	1.49811	3.41818e-06	1.1394e-07	1.04479e-07
GOTERM_BP_ALL	GO:0044700~single organism signaling	147	50.8651	8.03161e-10	SCARB1, SLC27A1, MAML2, CCL4L2, IL1RAP, RBPJ, PHB2, DOCK10, PREX1, ALCAM, TRIM28, RASSF3, UBASH3B, FCGRT, RASSF4, MYC, PIM1, SH3GLB1, BNIP3L, IL4R, ACSL1, ARID5B, SLC30A1, CACNA2D4, HLA-E, ARHGAP45, ADAM17, TBL1XR1, DDIT4, MYADM, S100A6, RIN3, ATP6V0D1, TRIB1, IL6ST, S100A8, IFNAR1, BLK, CCL3L3, ADRB2, RASAL3, RHOBTB1, ZFP36L2, IRAK2, ZMAT3, NACC2, PSAP, S100A12, BMF, MBP, HIVEP3, CD14, PAG1, ATP…	265	6207	16792	1.50069	3.75316e-06	1.2107e-07	1.11018e-07
GOTERM_BP_ALL	GO:0007155~cell adhesion	61	21.1073	1.30136e-09	DDR1, SIGLEC9, PTPRK, ETS1, PREX1, ALCAM, UBASH3B, FLOT1, SIRPA, VSIG4, SH3GLB1, EGFL7, IL4R, SYK, SLC11A1, C10ORF54, MTSS1, TGFBR2, HLA-E, APBB1IP, HCK, HSH2D, ADAM17, IRF1, IL1B, MYADM, RARA, MYH9, LCP1, IL6ST, S100A8, CD44, DBN1, PLEC, IFNAR1, ARF6, PTGER4, CX3CR1, TTYH1, PTAFR, RASAL3, ZFP36L2, HLX, ZBTB7B, PAG1, CCR1, VASP, MYBPH, FN1, MSN, LILRB2, VEGFA, FMNL2, THEMIS2, BCL6, BCL3, PTPN6, T…	265	1699	16792	2.27506	6.08123e-06	1.90039e-07	1.7426e-07
GOTERM_BP_ALL	GO:0031325~positive regulation of cellular metabolic process	85	29.4118	1.62626e-09	SCARB1, BTG2, SLC27A1, SPI1, MAML2, ELL, CCL4L2, RNF19B, ARHGEF10L, RBPJ, BACH1, ETS1, PHB2, IRF2BPL, TRIM28, MYC, PIM1, UBTF, FLOT1, CCNL1, JUNB, SH3GLB1, SYK, ACSL1, RFC2, SLC11A1, LMO2, TET2, RHOG, FOS, TNFRSF1B, DUSP6, TGFBR2, TNFRSF1A, RNF144A, ADAM17, TBL1XR1, IRF1, IL1B, RARA, MYH9, IRF8, TLR7, GSAP, MZF1, TRIB1, IL6ST, S100A8, CD44, IFNAR1, AKNA, CCL3L3, PTAFR, ADRB2, ZFP36L2, AURKB, RXRA…	265	2839	16792	1.89719	7.59949e-06	2.30288e-07	2.11168e-07
GOTERM_BP_ALL	GO:0007154~cell communication	147	50.8651	1.89743e-09	SCARB1, SLC27A1, MAML2, CCL4L2, IL1RAP, RBPJ, PHB2, DOCK10, PREX1, ALCAM, TRIM28, RASSF3, UBASH3B, FCGRT, RASSF4, MYC, PIM1, SH3GLB1, BNIP3L, IL4R, ACSL1, ARID5B, SLC30A1, HLA-E, ARHGAP45, ADAM17, TBL1XR1, DDIT4, MYADM, S100A6, RIN3, ATP6V0D1, TRIB1, IL6ST, S100A8, IFNAR1, BLK, CCL3L3, ADRB2, RASAL3, RHOBTB1, ZFP36L2, IRAK2, ZMAT3, NACC2, PSAP, S100A12, BMF, MBP, HIVEP3, CD14, PAG1, ATP6V1C1, BCL…	265	6275	16792	1.48443	8.86663e-06	2.60784e-07	2.39131e-07
GOTERM_BP_ALL	GO:0035556~intracellular signal transduction	81	28.0277	2.13527e-09	DOCK4, BTG2, CCL4L2, ARHGEF10L, PHB2, DOCK10, PREX1, SPRED1, TRIM28, MYC, PSD4, TAGAP, FLOT1, SH3GLB1, SYK, DUSP1, RFC2, RHOG, ARAP2, PPP2R5C, TNFRSF1B, DUSP6, TNFRSF1A, ARHGAP45, IL1B, DDIT4, MYADM, TLR7, LCP1, TRIB1, IL6ST, S100A8, CD44, IFNAR1, ARF6, BLK, PTGER4, CCL3L3, PTAFR, ADRB2, RASAL3, RHOBTB1, ZFP36L2, FYB, AURKB, ZMAT3, IRAK2, NACC2, PSAP, S100A12, E2F2, BMF, CD14, SH2B3, PAG1, CYTH1,…	265	2657	16792	1.93175	9.97805e-06	2.85089e-07	2.61418e-07
GOTERM_BP_ALL	GO:0032496~response to lipopolysaccharide	23	7.95848	2.57279e-09	PTGER4, CX3CR1, SCARB1, SLC11A1, PTAFR, LILRB2, FOS, SOD2, TNFRSF1B, TNFRSF1A, HCK, ADAM17, CNR2, IRAK2, IL1B, RARA, IRF8, CD14, LTBR, TRIB1, JUNB, S100A8, IFNAR1	265	302	16792	4.82589	1.20226e-05	3.33963e-07	3.06234e-07
GOTERM_BP_ALL	GO:0001775~cell activation	41	14.1869	3.39678e-09	PTGER4, CX3CR1, SPI1, PTAFR, RASAL3, RBPJ, ZFP36L2, PREX1, UBASH3B, CNR2, HLX, S100A12, VSIG4, ZBTB7B, PAG1, IL4R, SYK, SLC11A1, RHOG, LILRB2, TGFBR2, HLA-E, APBB1IP, HSH2D, ADAM17, KLF6, BCL6, ID2, IRF1, IL1B, BCL3, RARA, MYH9, PTPN6, TLR7, TNFSF8, LTBR, LCP1, IL6ST, ADA, IFNAR1	265	910	16792	2.85495	1.5873e-05	4.29004e-07	3.93384e-07
GOTERM_BP_ALL	GO:0050790~regulation of catalytic activity	74	25.6055	4.35933e-09	SCARB1, DOCK4, SLC27A1, SERPINA1, ELL, CCL4L2, ARHGEF10L, RCBTB2, DOCK10, PREX1, SPRED1, UBASH3B, MYC, PSD4, TAGAP, PIM1, CCNL1, CTSB, SH3GLB1, SYK, ACSL1, DUSP1, RFC2, SLC11A1, RHOG, ARAP2, PPP2R5C, DUSP6, TGFBR2, ARHGAP45, ADAM17, IL1B, TMBIM1, BMP2K, TBC1D24, RIN3, TRIB1, S100A8, CD44, PIF1, LRP1, CCL3L3, PTAFR, DENND3, ADRB2, RASAL3, RASIP1, AURKB, ADAP2, CNR2, SERTAD1, IRAK2, PSAP, S100A12, …	265	2357	16792	1.98943	2.03709e-05	5.36082e-07	4.91571e-07
GOTERM_BP_ALL	GO:0002237~response to molecule of bacterial origin	23	7.95848	5.949e-09	PTGER4, CX3CR1, SCARB1, SLC11A1, PTAFR, LILRB2, FOS, SOD2, TNFRSF1B, TNFRSF1A, HCK, ADAM17, CNR2, IRAK2, IL1B, RARA, IRF8, CD14, LTBR, TRIB1, JUNB, S100A8, IFNAR1	265	316	16792	4.61209	2.77993e-05	7.12812e-07	6.53627e-07
GOTERM_BP_ALL	GO:0051716~cellular response to stimulus	156	53.9792	6.38429e-09	SCARB1, SLC27A1, SPI1, MAML2, CCL4L2, IL1RAP, RBPJ, BACH1, ETS1, PHB2, DOCK10, PREX1, ALCAM, TRIM28, RASSF3, UBASH3B, FCGRT, RASSF4, MYC, PIM1, JUNB, SH3GLB1, BNIP3L, IL4R, ACSL1, USP3, LMO2, ARID5B, HLA-E, ARHGAP45, ADAM17, TBL1XR1, DDIT4, MYADM, S100A6, RIN3, ATP6V0D1, TRIB1, IL6ST, S100A8, IFNAR1, BLK, PIF1, CCL3L3, ADRB2, RASAL3, RHOBTB1, ZFP36L2, IRAK2, ZMAT3, NACC2, PSAP, S100A12, BMF, HIVE…	265	6927	16792	1.42704	2.98333e-05	7.45845e-07	6.83917e-07
GOTERM_BP_ALL	GO:0031347~regulation of defense response	34	11.7647	7.6951e-09	PTGER4, CX3CR1, CCL4L2, CCL3L3, ETS1, PHB2, RNF135, CNR2, IRAK2, FLOT1, S100A12, CD14, CTSB, MAP3K1, SYK, OSM, TNFRSF1B, TNFRSF1A, HLA-E, HCK, NLRP12, BCL6, IRF1, IL1B, ALOX5AP, TAB2, PTPN6, TLR7, TRIM38, PIK3AP1, IL6ST, S100A8, ADA, IFNAR1	265	676	16792	3.18705	3.59586e-05	8.77054e-07	8.04232e-07
GOTERM_BP_ALL	GO:0046649~lymphocyte activation	33	11.4187	8.29229e-09	PTGER4, SPI1, RASAL3, RBPJ, ZFP36L2, PREX1, HLX, VSIG4, ZBTB7B, PAG1, IL4R, SYK, SLC11A1, LILRB2, TGFBR2, HLA-E, APBB1IP, HSH2D, ADAM17, KLF6, BCL6, ID2, IRF1, IL1B, BCL3, RARA, MYH9, PTPN6, TNFSF8, LCP1, IL6ST, ADA, IFNAR1	265	643	16792	3.25207	3.87491e-05	9.22616e-07	8.46011e-07
GOTERM_BP_ALL	GO:0009617~response to bacterium	30	10.3806	9.73593e-09	PTGER4, CX3CR1, SCARB1, PTAFR, RBPJ, LYST, CNR2, IRAK2, S100A12, CD14, JUNB, SYK, SLC11A1, LILRB2, FOS, TNFRSF1B, SOD2, TNFRSF1A, HLA-E, HCK, ADAM17, IL1B, BCL3, RARA, IRF8, TNFSF8, LTBR, TRIB1, S100A8, IFNAR1	265	544	16792	3.49445	4.5495e-05	1.05805e-06	9.70197e-07
GOTERM_BP_ALL	GO:0070887~cellular response to chemical stimulus	79	27.3356	1.01175e-08	SCARB1, DOCK4, SLC27A1, SPI1, CCL4L2, PTPRK, IL1RAP, RBPJ, BACH1, ETS1, PHB2, LYST, PREX1, SPRED1, MYC, PIM1, FLOT1, PMEPA1, JUNB, CTSB, KLF10, BNIP3L, IL4R, SYK, ACSL1, DUSP1, LMO2, RHOG, FOS, TNFRSF1B, DUSP6, TGFBR2, HLA-E, TNFRSF1A, HCK, ADAM17, IRF1, IL1B, DDIT4, RARA, FAM20C, IRF8, ATP6V0D1, TRIB1, IL6ST, S100A8, CD44, IFNAR1, PTGER4, CX3CR1, CCL3L3, PTAFR, ZFP36L2, RXRA, CNR2, IRAK2, GNG7, …	265	2648	16792	1.89045	4.72782e-05	1.07453e-06	9.85311e-07
GOTERM_BP_ALL	GO:0009893~positive regulation of metabolic process	87	30.1038	1.04697e-08	SCARB1, BTG2, SLC27A1, SPI1, MAML2, ELL, CCL4L2, RNF19B, ARHGEF10L, RBPJ, BACH1, ETS1, PHB2, IRF2BPL, TRIM28, MYC, PIM1, UBTF, FLOT1, CCNL1, JUNB, SH3GLB1, SYK, ACSL1, RFC2, SLC11A1, LMO2, TET2, RHOG, FOS, TNFRSF1B, DUSP6, TGFBR2, TNFRSF1A, RNF144A, ADAM17, TBL1XR1, IRF1, IL1B, RARA, MYH9, IRF8, TLR7, GSAP, MZF1, TRIB1, IL6ST, S100A8, CD44, IFNAR1, AKNA, CCL3L3, PTAFR, RETN, ADRB2, ZFP36L2, AURKB…	265	3052	16792	1.80631	4.89238e-05	1.08722e-06	9.96951e-07
GOTERM_BP_ALL	GO:0009607~response to biotic stimulus	39	13.4948	1.15221e-08	PTGER4, CX3CR1, SCARB1, PTAFR, HNMT, RBPJ, LYST, CNR2, IRAK2, MYC, S100A12, CD14, JUNB, BNIP3L, IL4R, SYK, SLC11A1, LILRB2, FOS, TNFRSF1B, SOD2, TNFRSF1A, HLA-E, HCK, ADAM17, IRF1, IL1B, DDIT4, BCL3, RARA, IRF8, TLR7, PTX3, TNFSF8, LTBR, TRIM38, TRIB1, S100A8, IFNAR1	265	873	16792	2.83079	5.38413e-05	1.15862e-06	1.06242e-06
GOTERM_BP_ALL	GO:0010604~positive regulation of macromolecule metabolic process	83	28.7197	1.16531e-08	BTG2, SLC27A1, SPI1, MAML2, ELL, CCL4L2, RNF19B, ARHGEF10L, RBPJ, BACH1, ETS1, PHB2, IRF2BPL, TRIM28, MYC, PIM1, UBTF, FLOT1, CCNL1, JUNB, SYK, ACSL1, RFC2, SLC11A1, LMO2, TET2, RHOG, FOS, TNFRSF1B, DUSP6, TGFBR2, TNFRSF1A, RNF144A, ADAM17, TBL1XR1, IRF1, IL1B, RARA, MYH9, IRF8, TLR7, GSAP, MZF1, TRIB1, IL6ST, S100A8, CD44, IFNAR1, AKNA, CCL3L3, PTAFR, RETN, ADRB2, ZFP36L2, AURKB, RXRA, SERTAD1, …	265	2856	16792	1.84152	5.44536e-05	1.15862e-06	1.06242e-06
GOTERM_BP_ALL	GO:1902531~regulation of intracellular signal transduction	59	20.4152	1.26751e-08	CCL4L2, ARHGEF10L, PHB2, PREX1, SPRED1, MYC, PSD4, TAGAP, FLOT1, SH3GLB1, SYK, DUSP1, RFC2, RHOG, ARAP2, PPP2R5C, TNFRSF1B, DUSP6, TNFRSF1A, ARHGAP45, IL1B, DDIT4, MYADM, TLR7, TRIB1, IL6ST, S100A8, CD44, ARF6, CCL3L3, ADRB2, RASAL3, RHOBTB1, AURKB, IRAK2, NACC2, PSAP, S100A12, BMF, CYTH1, CCR1, HEXIM1, MAP3K1, OSM, FN1, ARHGAP26, SOD2, ARHGAP25, VEGFA, RCAN1, NLRP12, BCL6, BCL3, PTPN6, TAB2, LTB…	265	1714	16792	2.18121	5.92288e-05	1.23397e-06	1.13151e-06
GOTERM_BP_ALL	GO:0098609~cell-cell adhesion	46	15.917	1.63867e-08	PTGER4, TTYH1, PTAFR, RASAL3, ETS1, ZFP36L2, PREX1, ALCAM, UBASH3B, HLX, FLOT1, VSIG4, ZBTB7B, PAG1, SH3GLB1, VASP, IL4R, SYK, SLC11A1, C10ORF54, MSN, LILRB2, TGFBR2, HLA-E, APBB1IP, HSH2D, ADAM17, FMNL2, BCL6, IRF1, IL1B, BCL3, MYADM, RARA, MYH9, PTPN6, TNFSF8, LCP1, IL6ST, CD44, S100A8, DBN1, ADA, PLEC, PICALM, IFNAR1	265	1164	16792	2.50416	7.65723e-05	1.56276e-06	1.433e-06
GOTERM_BP_ALL	GO:0065007~biological regulation	222	76.8166	1.76757e-08	SPI1, MAML2, RBPJ, BACH1, PHB2, RCBTB2, PREX1, ALCAM, RASSF3, TRIM28, UBASH3B, RASSF4, MYC, FTH1, VSIG4, CCNL1, JUNB, ACSL1, SLC11A1, CACNA2D4, HLA-E, DDIT4, RIN3, GSAP, ATP6V0D1, TRIB1, PIF1, TTYH1, S100A12, HIVEP3, CD14, ZBTB7B, PAG1, ATP6V1C1, CCR1, VASP, HEXIM1, FN1, ELL2, FOSL2, ID2, AGO2, ID3, TNFSF8, FBXL5, RGL1, ADA, SLC2A4RG, DDR1, BTG2, SIGLEC9, SERPINA1, ELL, PTPRK, PPP3CC, ADAMTSL4, C…	265	11548	16792	1.21816	8.25949e-05	1.65197e-06	1.5148e-06
GOTERM_BP_ALL	GO:0048856~anatomical structure development	130	44.9827	2.43708e-08	SPI1, NAB2, ATN1, IL1RAP, HNMT, RBPJ, ETS1, PHB2, PREX1, ALCAM, TRIM28, UBASH3B, MYC, PIM1, FAM65B, JUNB, IL4R, LMO2, ARID5B, SLC30A1, MTURN, ADAM17, TBL1XR1, DDIT4, MYADM, TBC1D24, S100A6, ATP6V0D1, TRIB1, IL6ST, S100A8, ADRB2, ZFP36L2, ADAP2, PSAP, MBP, HIVEP3, ZBTB7B, BCL9L, HEXIM1, CCR1, VASP, ZFHX3, FBXO38, FN1, MSN, KIAA0430, ARHGAP26, FOSL2, RCAN1, BCL6, ID2, AGO2, BCL3, ID3, TAB2, TNFSF8,…	265	5473	16792	1.50513	0.000113878	2.23303e-06	2.04762e-06
GOTERM_BP_ALL	GO:0046631~alpha-beta T cell activation	14	4.84429	2.81888e-08	PTGER4, IL4R, SYK, RASAL3, TGFBR2, HLA-E, BCL6, HLX, IRF1, BCL3, RARA, TNFSF8, ZBTB7B, ADA	265	114	16792	7.78179	0.000131718	2.5332e-06	2.32287e-06
GOTERM_BP_ALL	GO:0050900~leukocyte migration	24	8.3045	3.01425e-08	PTGER4, CCR1, CX3CR1, SYK, CCL3L3, CCL4L2, PTAFR, FN1, MSN, LYST, VEGFA, PREX1, HCK, NLRP12, ADAM17, CNR2, IL1B, S100A12, MYH9, SIRPA, PTPN6, CD44, ADA, S100A8	265	376	16792	4.04464	0.000140846	2.62965e-06	2.41131e-06
GOTERM_BP_ALL	GO:0043207~response to external biotic stimulus	37	12.8028	3.09503e-08	PTGER4, CX3CR1, SCARB1, PTAFR, RBPJ, LYST, CNR2, IRAK2, S100A12, CD14, JUNB, BNIP3L, IL4R, SYK, SLC11A1, LILRB2, FOS, TNFRSF1B, SOD2, TNFRSF1A, HLA-E, HCK, ADAM17, IRF1, IL1B, DDIT4, BCL3, RARA, IRF8, TLR7, PTX3, TNFSF8, LTBR, TRIM38, TRIB1, S100A8, IFNAR1	265	829	16792	2.82816	0.00014462	2.62965e-06	2.41131e-06
GOTERM_BP_ALL	GO:0051707~response to other organism	37	12.8028	3.09503e-08	PTGER4, CX3CR1, SCARB1, PTAFR, RBPJ, LYST, CNR2, IRAK2, S100A12, CD14, JUNB, BNIP3L, IL4R, SYK, SLC11A1, LILRB2, FOS, TNFRSF1B, SOD2, TNFRSF1A, HLA-E, HCK, ADAM17, IRF1, IL1B, DDIT4, BCL3, RARA, IRF8, TLR7, PTX3, TNFSF8, LTBR, TRIM38, TRIB1, S100A8, IFNAR1	265	829	16792	2.82816	0.00014462	2.62965e-06	2.41131e-06
GOTERM_BP_ALL	GO:0050789~regulation of biological process	213	73.7024	3.17552e-08	SPI1, MAML2, RBPJ, BACH1, PHB2, PREX1, ALCAM, RASSF3, TRIM28, UBASH3B, RASSF4, MYC, FTH1, VSIG4, CCNL1, JUNB, ACSL1, SLC11A1, CACNA2D4, HLA-E, DDIT4, RIN3, GSAP, ATP6V0D1, TRIB1, PIF1, TTYH1, S100A12, HIVEP3, CD14, ZBTB7B, PAG1, ATP6V1C1, CCR1, VASP, HEXIM1, FN1, ELL2, FOSL2, ID2, AGO2, ID3, TNFSF8, FBXL5, RGL1, ADA, SLC2A4RG, DDR1, BTG2, SIGLEC9, SERPINA1, ELL, PTPRK, PPP3CC, ADAMTSL4, CTSB, SYK…	265	10922	16792	1.23576	0.000148381	2.64985e-06	2.42984e-06
GOTERM_BP_ALL	GO:0008283~cell proliferation	61	21.1073	3.91834e-08	DDR1, SCARB1, BTG2, USPL1, NAB2, PTPRK, RBPJ, ETS1, PHB2, MYC, FTH1, PIM1, VSIG4, JUNB, KLF10, EGFL7, SYK, SLC11A1, RHOG, EMP1, PPP2R5C, MTSS1, TGFBR2, HLA-E, HCK, ADAM17, IRF1, IL1B, DDIT4, S100A6, RARA, TRIB1, IL6ST, DBN1, CX3CR1, LRP1, CCL3L3, PTAFR, RETN, RASAL3, ZFP36L2, AURKB, RXRA, SERTAD1, HLX, NACC2, CREG1, RBM38, OSM, FN1, LILRB2, SOD2, ACVR2A, FOSL2, VEGFA, BCL6, ID2, PTPN6, TNFSF8, AD…	265	1861	16792	2.07702	0.000183087	3.21235e-06	2.94563e-06
GOTERM_BP_ALL	GO:0034097~response to cytokine	36	12.4567	4.36442e-08	CX3CR1, SLC27A1, CCL4L2, CCL3L3, PTAFR, IL1RAP, HNMT, ETS1, ZFP36L2, IRAK2, MYC, CD14, JUNB, CCR1, IL4R, SYK, ACSL1, SLC11A1, OSM, FOS, TNFRSF1B, TNFRSF1A, HLA-E, HCK, NLRP12, ADAM17, IRF1, IL1B, RARA, IRF8, PTPN6, LTBR, TRIM38, IL6ST, CD44, IFNAR1	265	802	16792	2.84436	0.000203929	3.51637e-06	3.2244e-06
GOTERM_BP_ALL	GO:0002684~positive regulation of immune system process	40	13.8408	4.64449e-08	BLK, PTAFR, RASAL3, ETS1, FYB, HLX, IRAK2, FLOT1, CD14, VSIG4, PAG1, CTSB, CCR1, KLF10, IL4R, MAP3K1, SYK, CMTM3, SLC11A1, LILRB2, FOS, ACVR2A, TGFBR2, HLA-E, VEGFA, HCK, ADAM17, THEMIS2, BCL6, ID2, IRF1, IL1B, RARA, TAB2, PTPN6, TLR7, PIK3AP1, TRIB1, IL6ST, ADA	265	960	16792	2.64025	0.000217014	3.67859e-06	3.37316e-06
GOTERM_BP_ALL	GO:0044707~single-multicellular organism process	137	47.4048	4.7601e-08	SCARB1, SLC27A1, SPI1, NAB2, ATN1, IL1RAP, HNMT, RBPJ, ETS1, PHB2, PREX1, ALCAM, TRIM28, UBASH3B, MYC, PIM1, FAM65B, VSIG4, RPS11, JUNB, IL4R, SLC11A1, LMO2, ARID5B, SLC30A1, CACNA2D4, MTURN, HLA-E, ADAM17, TBL1XR1, DDIT4, MYADM, TBC1D24, S100A6, ATP6V0D1, TRIB1, IL6ST, S100A8, IFNAR1, ADRB2, ZFP36L2, ADAP2, PSAP, S100A12, MBP, HIVEP3, CD14, ZBTB7B, BCL9L, HEXIM1, CCR1, VASP, ZFHX3, FBXO38, FN1, …	265	5943	16792	1.46073	0.000222415	3.70732e-06	3.3995e-06
GOTERM_BP_ALL	GO:1903706~regulation of hemopoiesis	22	7.61246	5.6704e-08	CCR1, KLF10, SPI1, IL4R, SYK, LILRB2, FOS, ETS1, ZFP36L2, ACVR2A, TGFBR2, BCL6, UBASH3B, HLX, MYC, ID2, IRF1, RARA, PTPN6, ZBTB7B, TRIB1, ADA	265	328	16792	4.25016	0.000264943	4.3439e-06	3.98322e-06
GOTERM_BP_ALL	GO:1902105~regulation of leukocyte differentiation	19	6.57439	6.22001e-08	CCR1, KLF10, IL4R, SYK, LILRB2, FOS, ZFP36L2, TGFBR2, BCL6, UBASH3B, HLX, MYC, ID2, IRF1, RARA, PTPN6, ZBTB7B, TRIB1, ADA	265	244	16792	4.93424	0.000290619	4.68809e-06	4.29883e-06
GOTERM_BP_ALL	GO:0033993~response to lipid	37	12.8028	7.85481e-08	PTGER4, CX3CR1, SCARB1, PTAFR, HNMT, ETS1, PHB2, ZFP36L2, RXRA, CNR2, IRAK2, MYC, PIM1, PMEPA1, CD14, JUNB, ACSL1, DUSP1, SLC11A1, MSN, LILRB2, FOS, TNFRSF1B, SOD2, TGFBR2, TNFRSF1A, HCK, ADAM17, IL1B, DDIT4, RARA, IRF8, ID3, LTBR, TRIB1, S100A8, IFNAR1	265	860	16792	2.72621	0.000366988	5.82627e-06	5.34252e-06
GOTERM_BP_ALL	GO:0032502~developmental process	131	45.3287	7.97956e-08	SPI1, NAB2, ATN1, IL1RAP, HNMT, RBPJ, ETS1, PHB2, PREX1, ALCAM, TRIM28, UBASH3B, MYC, PIM1, FAM65B, JUNB, IL4R, LMO2, ARID5B, SLC30A1, MTURN, ADAM17, TBL1XR1, DDIT4, MYADM, TBC1D24, S100A6, ATP6V0D1, TRIB1, IL6ST, S100A8, ADRB2, ZFP36L2, ADAP2, PSAP, MBP, HIVEP3, ZBTB7B, BCL9L, HEXIM1, CCR1, VASP, ZFHX3, FBXO38, FN1, MSN, KIAA0430, ARHGAP26, FOSL2, RCAN1, BCL6, ID2, AGO2, BCL3, ID3, TAB2, TNFSF8,…	265	5632	16792	1.47389	0.000372815	5.82633e-06	5.34257e-06
GOTERM_BP_ALL	GO:0071310~cellular response to organic substance	67	23.1834	8.44282e-08	SCARB1, SLC27A1, SPI1, CCL4L2, PTPRK, IL1RAP, RBPJ, PHB2, SPRED1, MYC, PIM1, FLOT1, PMEPA1, JUNB, CTSB, KLF10, IL4R, SYK, ACSL1, DUSP1, LMO2, FOS, TNFRSF1B, DUSP6, TGFBR2, HLA-E, TNFRSF1A, HCK, ADAM17, IRF1, IL1B, DDIT4, RARA, FAM20C, IRF8, ATP6V0D1, TRIB1, IL6ST, CD44, IFNAR1, PTGER4, CX3CR1, CCL3L3, PTAFR, ZFP36L2, RXRA, IRAK2, GNG7, PSAP, CD14, ATP6V1C1, BCL9L, CCR1, OSM, MSN, PTPN12, LILRB2, …	265	2186	16792	1.94214	0.000394455	6.06974e-06	5.56577e-06
GOTERM_BP_ALL	GO:0031349~positive regulation of defense response	24	8.3045	1.01807e-07	PTGER4, MAP3K1, SYK, CCL3L3, CCL4L2, OSM, ETS1, TNFRSF1A, HLA-E, HCK, NLRP12, IRAK2, IL1B, IRF1, ALOX5AP, FLOT1, S100A12, TAB2, TLR7, CD14, PIK3AP1, IL6ST, S100A8, CTSB	265	402	16792	3.78305	0.000475629	7.20822e-06	6.60972e-06
GOTERM_BP_ALL	GO:0030098~lymphocyte differentiation	21	7.26644	1.05058e-07	PTGER4, SPI1, IL4R, SYK, LILRB2, RBPJ, ZFP36L2, TGFBR2, PREX1, KLF6, ADAM17, BCL6, HLX, ID2, IRF1, BCL3, RARA, TNFSF8, PTPN6, ZBTB7B, ADA	265	310	16792	4.29254	0.000490816	7.32741e-06	6.71902e-06
GOTERM_BP_ALL	GO:0050776~regulation of immune response	38	13.1488	1.10744e-07	BLK, SIGLEC9, PTAFR, PHB2, FYB, RNF135, HLX, IRAK2, FCGRT, FLOT1, CD14, VSIG4, CD300LF, PAG1, LAIR1, CTSB, IL4R, MAP3K1, SYK, CMTM3, SLC11A1, LILRB2, FOS, HLA-E, HCK, THEMIS2, BCL6, IRF1, IL1B, RARA, CD300E, TAB2, PTPN6, TLR7, PIK3AP1, IL6ST, ADA, IFNAR1	265	912	16792	2.64025	0.000517372	7.61037e-06	6.97848e-06
GOTERM_BP_ALL	GO:0046632~alpha-beta T cell differentiation	12	4.15225	1.1481e-07	PTGER4, IL4R, SYK, BCL6, HLX, IRF1, BCL3, RARA, TNFSF8, ZBTB7B, ADA, TGFBR2	265	87	16792	8.74014	0.000536362	7.77544e-06	7.12985e-06
GOTERM_BP_ALL	GO:0030099~myeloid cell differentiation	22	7.61246	1.21217e-07	CCR1, KLF10, SPI1, TET2, FOS, RBPJ, ETS1, ACVR2A, TGFBR2, VEGFA, BCL6, UBASH3B, MYC, ID2, RARA, IRF8, FAM20C, MYH9, PTPN6, LTBR, TRIB1, JUNB	265	343	16792	4.06429	0.000566286	8.09209e-06	7.42021e-06
GOTERM_BP_ALL	GO:0050727~regulation of inflammatory response	21	7.26644	1.28698e-07	PTGER4, CX3CR1, CCL3L3, CCL4L2, OSM, TNFRSF1B, ETS1, PHB2, TNFRSF1A, HCK, NLRP12, CNR2, BCL6, IL1B, ALOX5AP, S100A12, TLR7, PIK3AP1, IL6ST, ADA, S100A8	265	314	16792	4.23786	0.000601226	8.47052e-06	7.76721e-06
GOTERM_BP_ALL	GO:0044093~positive regulation of molecular function	59	20.4152	1.53559e-07	SCARB1, DOCK4, SLC27A1, CCL4L2, ARHGEF10L, IL1RAP, PHB2, RCBTB2, DOCK10, PREX1, TRIM28, MYC, PSD4, TAGAP, PIM1, FLOT1, CCNL1, SH3GLB1, SYK, ACSL1, RFC2, SLC11A1, RHOG, ARAP2, ARID5B, DUSP6, TGFBR2, ARHGAP45, ADAM17, IL1B, RARA, TBC1D24, RIN3, S100A8, CD44, CCL3L3, PTAFR, GLRX, DENND3, ADRB2, RASAL3, AURKB, ADAP2, IRAK2, PSAP, S100A12, CYTH1, MAP3K1, FN1, ARHGAP26, ARHGAP25, VEGFA, NLRP12, ALOX5AP…	265	1840	16792	2.03185	0.000717324	9.9664e-06	9.13889e-06
GOTERM_BP_ALL	GO:0046634~regulation of alpha-beta T cell activation	11	3.80623	1.7713e-07	IL4R, SYK, BCL6, HLX, IRF1, RARA, ZBTB7B, RASAL3, ADA, TGFBR2, HLA-E	265	72	16792	9.68092	0.000827385	1.13387e-05	1.03973e-05
GOTERM_BP_ALL	GO:0022407~regulation of cell-cell adhesion	23	7.95848	2.08283e-07	IL4R, SYK, PTAFR, LILRB2, RASAL3, ETS1, TGFBR2, HLA-E, BCL6, UBASH3B, HLX, IL1B, IRF1, FLOT1, MYADM, RARA, PTPN6, VSIG4, ZBTB7B, IL6ST, CD44, ADA, PAG1	265	386	16792	3.7757	0.000972833	1.31528e-05	1.20607e-05
GOTERM_BP_ALL	GO:0048519~negative regulation of biological process	112	38.7543	2.22739e-07	SLC27A1, SPI1, NAB2, ATN1, RBPJ, BACH1, ETS1, PHB2, TRIM28, UBASH3B, MYC, FTH1, PIM1, VSIG4, JUNB, SH3GLB1, BNIP3L, IL4R, SLC11A1, USP3, ARID5B, SLC30A1, HLA-E, ADAM17, TBL1XR1, DDIT4, MYADM, MZF1, TRIB1, IL6ST, BLK, PIF1, CCL3L3, ADRB2, RASAL3, ZFP36L2, ATXN1, IRAK2, NACC2, PSAP, CD14, PAG1, BCL9L, HEXIM1, CCR1, ZFHX3, FN1, KIAA0430, RCAN1, PTPRE, BCL6, ID2, AGO2, BCL3, ID3, TAB2, ADA, PICALM, D…	265	4623	16792	1.53515	0.00104032	1.38781e-05	1.27258e-05
GOTERM_BP_ALL	GO:0042127~regulation of cell proliferation	52	17.9931	2.94476e-07	DDR1, BTG2, PTPRK, RBPJ, ETS1, PHB2, MYC, FTH1, VSIG4, JUNB, KLF10, EGFL7, IL4R, SYK, RHOG, PPP2R5C, TNFRSF1B, MTSS1, TGFBR2, HLA-E, TNFRSF1A, HCK, ADAM17, IRF1, IL1B, S100A6, RARA, TRIB1, IL6ST, BLK, CX3CR1, CCL3L3, PTAFR, RETN, RASAL3, SERTAD1, HLX, NACC2, RBM38, OSM, FN1, LILRB2, SOD2, TPD52L2, FOSL2, VEGFA, BCL6, ID2, PTPN6, LTBR, PLCD3, ADA	265	1552	16792	2.12309	0.00137514	1.81064e-05	1.6603e-05
GOTERM_BP_ALL	GO:0007275~multicellular organism development	116	40.1384	3.0435e-07	SPI1, NAB2, ATN1, IL1RAP, HNMT, RBPJ, ETS1, PHB2, PREX1, ALCAM, TRIM28, UBASH3B, MYC, PIM1, FAM65B, JUNB, IL4R, LMO2, ARID5B, SLC30A1, MTURN, ADAM17, TBL1XR1, DDIT4, MYADM, TBC1D24, S100A6, ATP6V0D1, TRIB1, IL6ST, S100A8, ADRB2, ZFP36L2, ADAP2, PSAP, MBP, HIVEP3, ZBTB7B, BCL9L, HEXIM1, CCR1, VASP, ZFHX3, FBXO38, FN1, MSN, ARHGAP26, FOSL2, RCAN1, BCL6, ID2, AGO2, BCL3, ID3, TAB2, TNFSF8, ADA, PICA…	265	4877	16792	1.50717	0.00142122	1.84705e-05	1.69369e-05
GOTERM_BP_ALL	GO:0050729~positive regulation of inflammatory response	13	4.49827	3.15192e-07	PTGER4, CCL3L3, CCL4L2, OSM, ETS1, TNFRSF1A, NLRP12, IL1B, ALOX5AP, S100A12, TLR7, IL6ST, S100A8	265	117	16792	7.04067	0.00147181	1.88786e-05	1.73111e-05
GOTERM_BP_ALL	GO:0050794~regulation of cellular process	204	70.5882	3.19154e-07	SPI1, MAML2, RBPJ, BACH1, PHB2, PREX1, ALCAM, RASSF3, TRIM28, UBASH3B, RASSF4, MYC, FTH1, VSIG4, CCNL1, JUNB, ACSL1, SLC11A1, CACNA2D4, HLA-E, DDIT4, RIN3, GSAP, ATP6V0D1, TRIB1, PIF1, S100A12, HIVEP3, CD14, ZBTB7B, PAG1, ATP6V1C1, CCR1, VASP, HEXIM1, FN1, ELL2, FOSL2, ID2, AGO2, ID3, TNFSF8, FBXL5, RGL1, ADA, SLC2A4RG, DDR1, BTG2, SIGLEC9, SERPINA1, ELL, PTPRK, PPP3CC, ADAMTSL4, CTSB, SYK, DUSP1…	265	10489	16792	1.2324	0.00149029	1.88786e-05	1.73111e-05
GOTERM_BP_ALL	GO:0010033~response to organic substance	78	26.9896	3.46511e-07	SCARB1, BTG2, SLC27A1, SPI1, CCL4L2, PTPRK, IL1RAP, RBPJ, HNMT, ETS1, PHB2, SPRED1, MYC, PIM1, FLOT1, PMEPA1, JUNB, CTSB, KLF10, IL4R, SYK, ACSL1, DUSP1, SLC11A1, LMO2, TET2, FOS, TNFRSF1B, DUSP6, TGFBR2, HLA-E, TNFRSF1A, HCK, ADAM17, IRF1, IL1B, DDIT4, RARA, FAM20C, IRF8, ATP6V0D1, TRIB1, IL6ST, S100A8, CD44, IFNAR1, PTGER4, CX3CR1, CCL3L3, PTAFR, RETN, ZFP36L2, RXRA, CNR2, IRAK2, GNG7, PSAP, CD…	265	2822	16792	1.75144	0.00161793	2.02406e-05	1.856e-05
GOTERM_BP_ALL	GO:0030155~regulation of cell adhesion	30	10.3806	3.52021e-07	DDR1, PTAFR, RASAL3, ETS1, PREX1, UBASH3B, HLX, FLOT1, VSIG4, ZBTB7B, CYTIP, PAG1, CYTH1, IL4R, SYK, FN1, LILRB2, TGFBR2, HLA-E, VEGFA, APBB1IP, BCL6, IRF1, IL1B, MYADM, RARA, PTPN6, IL6ST, CD44, ADA	265	643	16792	2.95642	0.00164364	2.03086e-05	1.86224e-05
GOTERM_BP_ALL	GO:0044767~single-organism developmental process	126	43.5986	3.74603e-07	SPI1, NAB2, ATN1, IL1RAP, HNMT, RBPJ, ETS1, PHB2, PREX1, ALCAM, TRIM28, UBASH3B, MYC, PIM1, FAM65B, JUNB, IL4R, LMO2, ARID5B, SLC30A1, MTURN, ADAM17, TBL1XR1, DDIT4, MYADM, TBC1D24, S100A6, ATP6V0D1, TRIB1, IL6ST, S100A8, ADRB2, ZFP36L2, ADAP2, PSAP, MBP, HIVEP3, ZBTB7B, BCL9L, HEXIM1, CCR1, VASP, ZFHX3, FBXO38, FN1, MSN, KIAA0430, ARHGAP26, FOSL2, RCAN1, BCL6, ID2, AGO2, BCL3, ID3, TAB2, TNFSF8,…	265	5475	16792	1.45829	0.00174899	2.13478e-05	1.95753e-05
GOTERM_BP_ALL	GO:0009888~tissue development	56	19.3772	4.30972e-07	DDR1, BTG2, SPI1, CPQ, RBPJ, PHB2, TRIM28, ADAMTSL4, MYC, FLOT1, FAM65B, JUNB, CTSB, KLF10, SRGN, DUSP1, ARID5B, EMP1, FOS, DUSP6, MTSS1, TGFBR2, TNFRSF1A, HCK, ADAM17, TBL1XR1, IL1B, MYADM, RARA, BMP2K, FAM20C, LCP1, CD44, ADRB2, RASIP1, RXRA, HLX, PSAP, HIVEP3, ZBTB7B, BCL9L, CCR1, VASP, FN1, MSN, PTPN12, ACVR2A, FOSL2, VEGFA, RCAN1, DHRS9, FABP5, ID2, ID3, BCOR, ADA	265	1756	16792	2.02078	0.00201191	2.42642e-05	2.22496e-05
GOTERM_BP_ALL	GO:0006468~protein phosphorylation	58	20.0692	4.47945e-07	DDR1, SLC27A1, CCL4L2, PHB2, SPRED1, TRIM28, UBASH3B, MYC, PIM1, FLOT1, PMEPA1, CCNL1, SYK, ACSL1, DUSP1, SLC11A1, TNFRSF1B, DUSP6, TGFBR2, TNFRSF1A, HCK, ADAM17, IL1B, DDIT4, MYADM, RARA, BMP2K, FAM20C, TLR7, TRIB1, IL6ST, CD44, IFNAR1, BLK, PTGER4, CCL3L3, ADRB2, RASAL3, ZFP36L2, FYB, AURKB, SERTAD1, IRAK2, PSAP, S100A12, ST3GAL1, CCR1, HEXIM1, MAP3K1, OSM, FN1, ACVR2A, VEGFA, NLRP12, STK17B, P…	265	1852	16792	1.98447	0.00209106	2.49196e-05	2.28505e-05
GOTERM_BP_ALL	GO:0002573~myeloid leukocyte differentiation	16	5.53633	4.71321e-07	CCR1, KLF10, SPI1, FOS, RBPJ, TGFBR2, VEGFA, UBASH3B, MYC, ID2, RARA, FAM20C, MYH9, LTBR, TRIB1, JUNB	265	195	16792	5.19926	0.00220006	2.59116e-05	2.37601e-05
GOTERM_BP_ALL	GO:1903037~regulation of leukocyte cell-cell adhesion	20	6.92042	5.61878e-07	IL4R, SYK, PTAFR, LILRB2, RASAL3, ETS1, TGFBR2, HLA-E, BCL6, HLX, IL1B, IRF1, RARA, PTPN6, VSIG4, ZBTB7B, IL6ST, CD44, ADA, PAG1	265	313	16792	4.04895	0.00262221	3.05309e-05	2.79959e-05
GOTERM_BP_ALL	GO:0030154~cell differentiation	93	32.1799	5.92839e-07	DDR1, BTG2, SPI1, NAB2, PTPRK, IL1RAP, RBPJ, ETS1, PREX1, ALCAM, TRIM28, UBASH3B, ADAMTSL4, MYC, FLOT1, FAM65B, RPS11, JUNB, CTSB, KLF10, EGFL7, IL4R, SYK, TET2, ARID5B, FOS, DUSP6, MTSS1, TGFBR2, TNFRSF1A, HCK, ADAM17, TBL1XR1, IRF1, IL1B, DDIT4, S100A6, MYADM, RARA, TBC1D24, FAM20C, MYH9, IRF8, TRIB1, IL6ST, RBM24, S100A8, DBN1, SDCCAG8, GAS7, ARF6, BLK, PTGER4, CX3CR1, RBM47, LRP1, RETN, ADRB2…	265	3652	16792	1.61365	0.0027665	3.1843e-05	2.9199e-05
GOTERM_BP_ALL	GO:0080134~regulation of response to stress	45	15.5709	7.47295e-07	PTGER4, CX3CR1, CCL4L2, CCL3L3, ETS1, PHB2, RNF135, SPRED1, UBASH3B, TRIM28, CNR2, IRAK2, MYC, NACC2, PSAP, FLOT1, S100A12, CD14, CTSB, MAP3K1, SYK, OSM, TNFRSF1B, SOD2, TGFBR2, TNFRSF1A, HLA-E, VEGFA, HCK, NLRP12, BCL6, IRF1, IL1B, ALOX5AP, TAB2, PTPN6, TLR7, LTBR, TRIM38, PIK3AP1, IL6ST, CD44, S100A8, ADA, IFNAR1	265	1285	16792	2.21904	0.00348602	3.96831e-05	3.63882e-05
GOTERM_BP_ALL	GO:0001816~cytokine production	29	10.0346	7.93657e-07	PTGER4, PTAFR, IL1RAP, RBPJ, RNF135, FLOT1, S100A12, CD14, VSIG4, SRGN, IL4R, SYK, SLC11A1, FN1, LILRB2, HLA-E, NLRP12, ADAM17, BCL6, IRF1, IL1B, BCL3, RARA, IRF8, TLR7, TRIM38, IL6ST, S100A8, IFNAR1	265	631	16792	2.91223	0.00370189	4.16715e-05	3.82115e-05
GOTERM_BP_ALL	GO:0048584~positive regulation of response to stimulus	61	21.1073	8.11522e-07	CCL4L2, RBPJ, ETS1, PHB2, SPRED1, PPP3CC, TRIM28, MYC, FLOT1, VSIG4, CTSB, SH3GLB1, IL4R, SYK, SLC11A1, TNFRSF1B, DUSP6, TGFBR2, HLA-E, TNFRSF1A, HCK, HSH2D, ADAM17, IRF1, IL1B, RARA, TLR7, IL6ST, S100A8, CD44, BLK, PTGER4, CCL3L3, PTAFR, ADRB2, FYB, HLX, IRAK2, NACC2, PSAP, S100A12, BMF, CD14, SH2B3, PAG1, CCR1, HEXIM1, MAP3K1, CMTM3, OSM, ACVR2A, VEGFA, NLRP12, THEMIS2, ALOX5AP, PTPN6, TAB2, LT…	265	2030	16792	1.9041	0.00378506	4.1875e-05	3.83981e-05
GOTERM_BP_ALL	GO:0043085~positive regulation of catalytic activity	51	17.6471	8.15456e-07	SCARB1, DOCK4, SLC27A1, CCL4L2, ARHGEF10L, RCBTB2, DOCK10, PREX1, MYC, PSD4, TAGAP, PIM1, CCNL1, SH3GLB1, SYK, ACSL1, RFC2, SLC11A1, RHOG, ARAP2, DUSP6, TGFBR2, ARHGAP45, ADAM17, IL1B, TBC1D24, RIN3, S100A8, CD44, CCL3L3, PTAFR, DENND3, ADRB2, RASAL3, AURKB, ADAP2, IRAK2, PSAP, S100A12, CYTH1, MAP3K1, FN1, ARHGAP26, ARHGAP25, VEGFA, NLRP12, ALOX5AP, TAB2, RGL1, SMAP2, PICALM	265	1559	16792	2.07291	0.00380338	4.1875e-05	3.83981e-05
GOTERM_BP_ALL	GO:0030217~T cell differentiation	16	5.53633	8.3476e-07	PTGER4, IL4R, SYK, LILRB2, ZFP36L2, TGFBR2, PREX1, ADAM17, BCL6, HLX, IRF1, BCL3, RARA, TNFSF8, ZBTB7B, ADA	265	204	16792	4.96989	0.00389324	4.24004e-05	3.88799e-05
GOTERM_BP_ALL	GO:0045087~innate immune response	34	11.7647	1.06759e-06	BLK, CCL4L2, CCL3L3, PTAFR, IL1RAP, LYST, LILRA5, RNF135, TRIM28, IRAK2, MYC, FLOT1, S100A12, CD14, VSIG4, CTSB, MAP3K1, SYK, SLC11A1, TUBB, HLA-E, HCK, IRF1, IRF8, CD300E, TAB2, PTPN6, TLR7, PTX3, TRIM38, PIK3AP1, CD44, S100A8, IFNAR1	265	836	16792	2.57709	0.00497644	5.36437e-05	4.91897e-05
GOTERM_BP_ALL	GO:1903708~positive regulation of hemopoiesis	14	4.84429	1.84258e-06	CCR1, KLF10, IL4R, SYK, LILRB2, FOS, ETS1, ACVR2A, TGFBR2, HLX, ID2, RARA, TRIB1, ADA	265	163	16792	5.44248	0.00857343	9.15998e-05	8.39943e-05
GOTERM_BP_ALL	GO:0048523~negative regulation of cellular process	103	35.6401	1.88613e-06	SLC27A1, SPI1, NAB2, ATN1, RBPJ, BACH1, ETS1, PHB2, TRIM28, UBASH3B, MYC, FTH1, PIM1, VSIG4, JUNB, SH3GLB1, BNIP3L, IL4R, USP3, ARID5B, SLC30A1, ADAM17, TBL1XR1, DDIT4, MYADM, MZF1, TRIB1, IL6ST, BLK, PIF1, CCL3L3, ADRB2, RASAL3, ZFP36L2, ATXN1, NACC2, PSAP, CD14, PAG1, BCL9L, HEXIM1, ZFHX3, FN1, KIAA0430, RCAN1, PTPRE, BCL6, ID2, AGO2, BCL3, ID3, TAB2, ADA, PICALM, DDR1, BTG2, SERPINA1, ELL, PTP…	265	4300	16792	1.51784	0.00877517	9.27778e-05	8.50745e-05
GOTERM_BP_ALL	GO:0045619~regulation of lymphocyte differentiation	13	4.49827	2.1773e-06	IL4R, SYK, LILRB2, ZFP36L2, TGFBR2, BCL6, HLX, ID2, IRF1, RARA, PTPN6, ZBTB7B, ADA	265	140	16792	5.88399	0.010123	0.000105985	9.71848e-05
GOTERM_BP_ALL	GO:0019221~cytokine-mediated signaling pathway	26	8.99654	2.35653e-06	CX3CR1, SLC27A1, CCL4L2, CCL3L3, PTAFR, IL1RAP, IRAK2, CCR1, IL4R, SYK, ACSL1, OSM, TNFRSF1B, TNFRSF1A, HLA-E, HCK, ADAM17, IRF1, IL1B, IRF8, PTPN6, LTBR, TRIM38, IL6ST, CD44, IFNAR1	265	554	16792	2.97386	0.0109517	0.000113526	0.0001041
GOTERM_BP_ALL	GO:0001932~regulation of protein phosphorylation	44	15.2249	2.51702e-06	SLC27A1, CCL4L2, CCL3L3, ADRB2, PHB2, SPRED1, UBASH3B, SERTAD1, IRAK2, MYC, PSAP, FLOT1, PIM1, S100A12, PMEPA1, CCNL1, CCR1, HEXIM1, MAP3K1, SYK, ACSL1, DUSP1, SLC11A1, OSM, FN1, TNFRSF1B, ACVR2A, DUSP6, TGFBR2, TNFRSF1A, VEGFA, NLRP12, ADAM17, IL1B, DDIT4, MYADM, TAB2, PTPN6, TLR7, LTBR, TRIB1, IL6ST, CD44, IFNAR1	265	1300	16792	2.1447	0.0116931	0.000120021	0.000110055
GOTERM_BP_ALL	GO:0008219~cell death	58	20.0692	2.67108e-06	BTG2, SPI1, ATN1, ETS1, PHB2, PPP3CC, RASSF3, ADAMTSL4, MYC, PIM1, CTSB, SH3GLB1, SRGN, BNIP3L, DUSP1, EMP1, PPP2R5C, TNFRSF1B, DUSP6, TGFBR2, TNFRSF1A, HCK, HSH2D, ADAM17, IRF1, IL1B, DDIT4, TMBIM1, RARA, IL6ST, S100A8, CD44, ARF6, BLK, CX3CR1, LRP1, AURKB, ZMAT3, NACC2, PSAP, E2F2, BMF, CD14, MAP3K1, OSM, SOD2, FOSL2, VEGFA, NLRP12, BCL6, STK17B, BCL3, ID3, PTPN6, TNFSF8, LTBR, ADA, PICALM	265	1958	16792	1.87703	0.0124044	0.00012608	0.000115612
GOTERM_BP_ALL	GO:0045785~positive regulation of cell adhesion	21	7.26644	3.1639e-06	IL4R, SYK, PTAFR, FN1, LILRB2, RASAL3, ETS1, TGFBR2, HLA-E, VEGFA, APBB1IP, PREX1, HLX, IL1B, FLOT1, MYADM, RARA, PTPN6, IL6ST, CD44, ADA	265	385	16792	3.45633	0.0146762	0.000147849	0.000135573
GOTERM_BP_ALL	GO:0001819~positive regulation of cytokine production	21	7.26644	3.27996e-06	PTGER4, IL4R, SYK, SLC11A1, PTAFR, IL1RAP, LILRB2, HLA-E, RNF135, NLRP12, ADAM17, IL1B, IRF1, BCL3, FLOT1, RARA, IRF8, TLR7, CD14, IL6ST, IFNAR1	265	386	16792	3.44738	0.0152104	0.000151755	0.000139155
GOTERM_BP_ALL	GO:0016477~cell migration	41	14.1869	3.57181e-06	DDR1, PTGER4, CX3CR1, SCARB1, DOCK4, LRP1, CCL4L2, CCL3L3, PTAFR, RETN, PTPRK, ETS1, LYST, PREX1, CNR2, MYC, S100A12, SIRPA, CCR1, SYK, RHOG, FN1, ARID5B, MSN, TGFBR2, VEGFA, HCK, NLRP12, ADAM17, FMNL1, IL1B, DDIT4, MYADM, MYH9, PTPN6, LCP1, TRIB1, CD44, S100A8, ADA, SDCCAG8	265	1184	16792	2.19426	0.0165526	0.000163638	0.000150051
GOTERM_BP_ALL	GO:0002274~myeloid leukocyte activation	13	4.49827	3.63314e-06	CX3CR1, SPI1, IL4R, SYK, SLC11A1, PTAFR, RBPJ, TGFBR2, PREX1, CNR2, S100A12, TLR7, LTBR	265	147	16792	5.6038	0.0168344	0.000164831	0.000151145
GOTERM_BP_ALL	GO:0050793~regulation of developmental process	61	21.1073	3.8688e-06	SPI1, NAB2, IL1RAP, RBPJ, SYNE3, ETS1, PHB2, PREX1, UBASH3B, MYC, FLOT1, KLF10, SRGN, IL4R, SYK, FOS, DUSP6, TGFBR2, TNFRSF1A, HCK, IRF1, IL1B, TMBIM1, MYADM, RARA, BMP2K, TBC1D24, FAM20C, MYH9, TRIB1, IL6ST, RBM24, DBN1, ARF6, CX3CR1, LRP1, RETN, ADRB2, ZFP36L2, RXRA, HLX, ZBTB7B, BCL9L, CCR1, RBM38, ZFHX3, FBXO38, FN1, MSN, LILRB2, ACVR2A, VEGFA, RCAN1, FMNL1, FMNL2, BCL6, ID2, ID3, PTPN6, BCOR…	265	2129	16792	1.81556	0.0179165	0.000173836	0.000159402
GOTERM_BP_ALL	GO:1901700~response to oxygen-containing compound	47	16.263	4.40347e-06	PTGER4, CX3CR1, SCARB1, BTG2, SLC27A1, SPI1, PTAFR, RETN, PTPRK, HNMT, ETS1, ZFP36L2, RXRA, CNR2, IRAK2, MYC, GNG7, PSAP, PIM1, CD14, JUNB, ATP6V1C1, KLF10, ACSL1, DUSP1, SLC11A1, MSN, LILRB2, FOS, TNFRSF1B, SOD2, TGFBR2, TNFRSF1A, PTPRE, HCK, ADAM17, IL1B, DDIT4, RARA, IRF8, ID3, LTBR, ATP6V0D1, TRIB1, S100A8, ADA, IFNAR1	265	1466	16792	2.03152	0.0203672	0.000195975	0.000179703
GOTERM_BP_ALL	GO:0048869~cellular developmental process	96	33.218	4.78723e-06	DDR1, BTG2, SPI1, NAB2, PTPRK, IL1RAP, RBPJ, SYNE3, ETS1, PREX1, ALCAM, TRIM28, UBASH3B, ADAMTSL4, MYC, FLOT1, FAM65B, RPS11, JUNB, CTSB, KLF10, EGFL7, IL4R, SYK, TET2, ARID5B, FOS, DUSP6, MTSS1, TGFBR2, TNFRSF1A, HCK, ADAM17, TBL1XR1, IRF1, IL1B, DDIT4, S100A6, MYADM, RARA, TBC1D24, FAM20C, MYH9, IRF8, ATP6V0D1, TRIB1, IL6ST, RBM24, S100A8, DBN1, SDCCAG8, GAS7, ARF6, BLK, PTGER4, CX3CR1, RBM47, …	265	3992	16792	1.52383	0.0221224	0.00020889	0.000191546
GOTERM_BP_ALL	GO:0051174~regulation of phosphorus metabolic process	50	17.301	4.816e-06	SLC27A1, ELL, CCL4L2, PHB2, SPRED1, UBASH3B, MYC, PIM1, FLOT1, PMEPA1, CCNL1, SH3GLB1, SYK, ACSL1, DUSP1, SLC11A1, TNFRSF1B, DUSP6, TGFBR2, TNFRSF1A, ADAM17, TBL1XR1, IL1B, DDIT4, MYADM, FAM20C, TLR7, TRIB1, IL6ST, CD44, IFNAR1, CCL3L3, PTAFR, ADRB2, SERTAD1, IRAK2, PSAP, S100A12, CCR1, HEXIM1, MAP3K1, OSM, FN1, KIAA0430, ACVR2A, VEGFA, NLRP12, PTPN6, TAB2, LTBR	265	1611	16792	1.96667	0.0222539	0.00020889	0.000191546
GOTERM_BP_ALL	GO:0001817~regulation of cytokine production	26	8.99654	4.82775e-06	PTGER4, PTAFR, IL1RAP, RNF135, FLOT1, CD14, VSIG4, SRGN, IL4R, SYK, SLC11A1, FN1, LILRB2, HLA-E, NLRP12, ADAM17, BCL6, IRF1, IL1B, BCL3, RARA, IRF8, TLR7, TRIM38, IL6ST, IFNAR1	265	577	16792	2.85532	0.0223076	0.00020889	0.000191546
GOTERM_BP_ALL	GO:0048513~animal organ development	80	27.6817	5.24868e-06	DDR1, BTG2, SPI1, NAB2, RBPJ, HNMT, ETS1, PHB2, PREX1, PPP3CC, TRIM28, UBASH3B, MYC, FLOT1, FAM65B, JUNB, CTSB, KLF10, SRGN, IL4R, SYK, GLRX5, TET2, ARID5B, FOS, MTSS1, TGFBR2, ADAM17, TBL1XR1, IRF1, DDIT4, RARA, BMP2K, FAM20C, MYH9, IRF8, LCP1, ATP6V0D1, TRIB1, CD44, ARF6, PTGER4, CX3CR1, RBM47, LRP1, RETN, ADRB2, ZFP36L2, RXRA, ADAP2, HLX, PSAP, HIVEP3, MBP, ZBTB7B, SH2B3, BCL9L, CCR1, HEXIM1, …	265	3129	16792	1.6201	0.0242288	0.000225019	0.000206336
GOTERM_BP_ALL	GO:0048731~system development	101	34.9481	5.89823e-06	SPI1, NAB2, ATN1, IL1RAP, HNMT, RBPJ, ETS1, PHB2, PREX1, ALCAM, TRIM28, UBASH3B, MYC, FAM65B, JUNB, IL4R, ARID5B, ADAM17, TBL1XR1, DDIT4, TBC1D24, S100A6, ATP6V0D1, TRIB1, IL6ST, S100A8, ADRB2, ZFP36L2, ADAP2, PSAP, MBP, HIVEP3, ZBTB7B, BCL9L, HEXIM1, CCR1, VASP, ZFHX3, FBXO38, FN1, MSN, ARHGAP26, FOSL2, RCAN1, BCL6, ID2, BCL3, ID3, TAB2, TNFSF8, ADA, PICALM, DDR1, BTG2, PTPRK, PPP3CC, PRX, FLOT1…	265	4291	16792	1.49149	0.0271861	0.000250568	0.000229763
GOTERM_BP_ALL	GO:0042325~regulation of phosphorylation	45	15.5709	6.2343e-06	SLC27A1, CCL4L2, CCL3L3, ADRB2, PHB2, SPRED1, UBASH3B, SERTAD1, IRAK2, MYC, PSAP, FLOT1, PIM1, S100A12, PMEPA1, CCNL1, CCR1, SH3GLB1, HEXIM1, MAP3K1, SYK, ACSL1, DUSP1, SLC11A1, OSM, FN1, TNFRSF1B, ACVR2A, DUSP6, TGFBR2, TNFRSF1A, VEGFA, NLRP12, ADAM17, IL1B, DDIT4, MYADM, TAB2, PTPN6, TLR7, LTBR, TRIB1, IL6ST, CD44, IFNAR1	265	1393	16792	2.047	0.0287127	0.000262458	0.000240666
GOTERM_BP_ALL	GO:0071345~cellular response to cytokine stimulus	29	10.0346	6.82515e-06	CX3CR1, SLC27A1, CCL4L2, CCL3L3, PTAFR, IL1RAP, ZFP36L2, IRAK2, MYC, CCR1, IL4R, SYK, ACSL1, OSM, TNFRSF1B, TNFRSF1A, HLA-E, HCK, NLRP12, ADAM17, IRF1, IL1B, IRF8, PTPN6, LTBR, TRIM38, IL6ST, CD44, IFNAR1	265	706	16792	2.60285	0.0313908	0.000284767	0.000261123
GOTERM_BP_ALL	GO:1902107~positive regulation of leukocyte differentiation	12	4.15225	7.07341e-06	CCR1, KLF10, IL4R, SYK, HLX, ID2, RARA, LILRB2, FOS, TRIB1, ADA, TGFBR2	265	131	16792	5.80452	0.0325138	0.000292514	0.000268226
GOTERM_BP_ALL	GO:0016310~phosphorylation	62	21.4533	8.0453e-06	DDR1, SLC27A1, CCL4L2, ENO2, PHB2, SPRED1, TRIM28, UBASH3B, MYC, PIM1, FLOT1, PMEPA1, TK2, CCNL1, SH3GLB1, SYK, ACSL1, DUSP1, SLC11A1, TNFRSF1B, DUSP6, TGFBR2, TNFRSF1A, HCK, ADAM17, IL1B, DDIT4, MYADM, RARA, BMP2K, FAM20C, TLR7, TRIB1, IL6ST, CD44, IFNAR1, BLK, PTGER4, CCL3L3, ADRB2, RASAL3, ZFP36L2, FYB, AURKB, SERTAD1, IRAK2, PSAP, S100A12, ST3GAL1, CCR1, HEXIM1, MAP3K1, GK, OSM, FN1, ACVR2A, …	265	2229	16792	1.76254	0.0368979	0.000329787	0.000302405
GOTERM_BP_ALL	GO:0010557~positive regulation of macromolecule biosynthetic process	49	16.955	8.45562e-06	SPI1, MAML2, ELL, ARHGEF10L, RBPJ, BACH1, ETS1, IRF2BPL, TRIM28, MYC, UBTF, CCNL1, JUNB, SYK, RFC2, SLC11A1, LMO2, TET2, RHOG, FOS, TNFRSF1A, TBL1XR1, IRF1, IL1B, RARA, IRF8, TLR7, MZF1, IFNAR1, AKNA, PTAFR, ADRB2, AURKB, RXRA, SERTAD1, HIVEP3, BCL9L, ZFHX3, OSM, ACVR2A, FOSL2, VEGFA, NLRP12, KLF6, ID2, AGO2, BCL3, TNFSF8, PICALM	265	1597	16792	1.94423	0.0387428	0.000343592	0.000315064
GOTERM_BP_ALL	GO:0051247~positive regulation of protein metabolic process	47	16.263	9.23587e-06	SLC27A1, CCL4L2, CCL3L3, PTAFR, RNF19B, ADRB2, PHB2, RXRA, IRAK2, MYC, PSAP, FLOT1, PIM1, S100A12, CCNL1, CCR1, MAP3K1, SYK, ACSL1, SLC11A1, OSM, FN1, MSN, TNFRSF1B, ACVR2A, DUSP6, TGFBR2, TNFRSF1A, VEGFA, RNF144A, NLRP12, ADAM17, BCL6, IRF1, IL1B, BCL3, MYH9, TAB2, TLR7, GSAP, LTBR, TRIB1, IL6ST, FBXL5, CD44, S100A8, PICALM	265	1508	16792	1.97494	0.0422413	0.000367569	0.00033705
GOTERM_BP_ALL	GO:0051254~positive regulation of RNA metabolic process	45	15.5709	9.26661e-06	BTG2, AKNA, SPI1, MAML2, ELL, ARHGEF10L, ADRB2, RBPJ, ETS1, BACH1, ZFP36L2, IRF2BPL, RXRA, TRIM28, SERTAD1, MYC, UBTF, HIVEP3, CCNL1, JUNB, BCL9L, ZFHX3, SLC11A1, LMO2, TET2, RHOG, OSM, FOS, ACVR2A, TNFRSF1A, FOSL2, VEGFA, KLF6, TBL1XR1, ID2, IRF1, IL1B, AGO2, BCL3, RARA, IRF8, TNFSF8, MZF1, PICALM, IFNAR1	265	1415	16792	2.01517	0.0423789	0.000367569	0.00033705
GOTERM_BP_ALL	GO:0022409~positive regulation of cell-cell adhesion	16	5.53633	9.28165e-06	IL4R, SYK, PTAFR, LILRB2, RASAL3, ETS1, TGFBR2, HLA-E, HLX, IL1B, FLOT1, RARA, PTPN6, IL6ST, CD44, ADA	265	248	16792	4.08813	0.0424462	0.000367569	0.00033705
GOTERM_BP_ALL	GO:1903039~positive regulation of leukocyte cell-cell adhesion	15	5.19031	9.38918e-06	IL4R, SYK, PTAFR, LILRB2, RASAL3, ETS1, TGFBR2, HLA-E, HLX, IL1B, RARA, PTPN6, IL6ST, CD44, ADA	265	218	16792	4.36005	0.0429272	0.000368703	0.000338089
GOTERM_BP_ALL	GO:0032101~regulation of response to external stimulus	29	10.0346	1.00559e-05	PTGER4, CX3CR1, CCL4L2, CCL3L3, ETS1, PHB2, UBASH3B, CNR2, S100A12, CCR1, SYK, OSM, TNFRSF1B, TGFBR2, TNFRSF1A, VEGFA, HCK, NLRP12, ADAM17, BCL6, IL1B, ALOX5AP, TLR7, TRIM38, PIK3AP1, TRIB1, IL6ST, S100A8, ADA	265	721	16792	2.5487	0.0459045	0.000391594	0.00035908
GOTERM_BP_ALL	GO:0019220~regulation of phosphate metabolic process	49	16.955	1.04948e-05	SLC27A1, ELL, CCL4L2, PHB2, SPRED1, UBASH3B, MYC, PIM1, FLOT1, PMEPA1, CCNL1, SH3GLB1, SYK, ACSL1, DUSP1, SLC11A1, TNFRSF1B, DUSP6, TGFBR2, TNFRSF1A, ADAM17, TBL1XR1, IL1B, DDIT4, MYADM, TLR7, TRIB1, IL6ST, CD44, IFNAR1, CCL3L3, PTAFR, ADRB2, SERTAD1, IRAK2, PSAP, S100A12, CCR1, HEXIM1, MAP3K1, OSM, FN1, KIAA0430, ACVR2A, VEGFA, NLRP12, PTPN6, TAB2, LTBR	265	1610	16792	1.92853	0.0478595	0.000405309	0.000371656
GOTERM_BP_ALL	GO:0012501~programmed cell death	54	18.6851	1.06952e-05	BTG2, SPI1, ATN1, ETS1, PHB2, PPP3CC, RASSF3, ADAMTSL4, MYC, PIM1, CTSB, SH3GLB1, SRGN, BNIP3L, DUSP1, PPP2R5C, TNFRSF1B, DUSP6, TGFBR2, TNFRSF1A, HCK, HSH2D, ADAM17, IRF1, IL1B, DDIT4, TMBIM1, RARA, IL6ST, S100A8, CD44, ARF6, BLK, CX3CR1, LRP1, AURKB, ZMAT3, NACC2, E2F2, BMF, CD14, MAP3K1, OSM, SOD2, VEGFA, NLRP12, BCL6, STK17B, BCL3, ID3, PTPN6, TNFSF8, LTBR, ADA	265	1852	16792	1.84761	0.0487505	0.000409661	0.000375647
