# Supplementary material for: Evidence for additive and synergistic action of mammalian enhancers during cell fate determination
Source: eLife. 2021 Mar 26;10:e65381. doi: 10.7554/eLife.65381 (PMC8004103; doi:10.7554/eLife.65381)
Supplement: Supplementary file 4. [file elife-65381-supp4.xlsx]

## Sheet: SUPER.EC0
Category	Term	Count	%	PValue	Genes	List Total	Pop Hits	Pop Total	Fold Enrichment	Bonferroni	Benjamini	FDR
GOTERM_BP_ALL	GO:0048731~system development	12	66.6667	0.0007601	ROBO2, CCR1, KLF10, ZHX2, PARD6B, BTG2, PHLPP1, BCL2, ATP6V0D1, TRIB1, MTSS1, CTSB	18	4291	16792	2.60887	0.602115	0.251771	0.246578
GOTERM_BP_ALL	GO:0051452~intracellular pH reduction	3	16.6667	0.00105878	BCL2, ATP6V0D1, ATP6V1C1	18	48	16792	58.3056	0.72305	0.251771	0.246578
GOTERM_BP_ALL	GO:0033554~cellular response to stress	8	44.4444	0.00107973	KLF10, BTG2, PHLPP1, USP3, BCL2, ATP6V0D1, TRIB1, MTSS1	18	1773	16792	4.20931	0.73	0.251771	0.246578
GOTERM_BP_ALL	GO:0045851~pH reduction	3	16.6667	0.00110318	BCL2, ATP6V0D1, ATP6V1C1	18	49	16792	57.1156	0.737574	0.251771	0.246578
GOTERM_BP_ALL	GO:0002763~positive regulation of myeloid leukocyte differentiation	3	16.6667	0.00110318	CCR1, KLF10, TRIB1	18	49	16792	57.1156	0.737574	0.251771	0.246578
GOTERM_BP_ALL	GO:0009725~response to hormone	6	33.3333	0.00124639	ROBO2, BTG2, BCL2, ATP6V0D1, ATP6V1C1, CTSB	18	854	16792	6.55425	0.779436	0.251771	0.246578
GOTERM_BP_ALL	GO:0048869~cellular developmental process	11	61.1111	0.00205753	ROBO2, CCR1, KLF10, ZHX2, PARD6B, BTG2, BCL2, ATP6V0D1, TRIB1, MTSS1, CTSB	18	3992	16792	2.57059	0.91761	0.280586	0.274799
GOTERM_BP_ALL	GO:0007275~multicellular organism development	12	66.6667	0.00241952	ROBO2, CCR1, KLF10, ZHX2, PARD6B, BTG2, PHLPP1, BCL2, ATP6V0D1, TRIB1, MTSS1, CTSB	18	4877	16792	2.2954	0.946923	0.280586	0.274799
GOTERM_BP_ALL	GO:0045639~positive regulation of myeloid cell differentiation	3	16.6667	0.00298208	CCR1, KLF10, TRIB1	18	81	16792	34.5514	0.973209	0.280586	0.274799
GOTERM_BP_ALL	GO:0009719~response to endogenous stimulus	7	38.8889	0.00308092	ROBO2, KLF10, BTG2, BCL2, ATP6V0D1, ATP6V1C1, CTSB	18	1548	16792	4.21849	0.976242	0.280586	0.274799
GOTERM_BP_ALL	GO:0051453~regulation of intracellular pH	3	16.6667	0.00350864	BCL2, ATP6V0D1, ATP6V1C1	18	88	16792	31.803	0.985877	0.280586	0.274799
GOTERM_BP_ALL	GO:0008285~negative regulation of cell proliferation	5	27.7778	0.00355827	KLF10, BTG2, BCL2, TRIB1, MTSS1	18	651	16792	7.16505	0.986704	0.280586	0.274799
GOTERM_BP_ALL	GO:0048511~rhythmic process	4	22.2222	0.00356074	ROBO2, KLF10, PHLPP1, BCL2	18	312	16792	11.9601	0.986744	0.280586	0.274799
GOTERM_BP_ALL	GO:0010033~response to organic substance	9	50	0.00364167	ROBO2, CCR1, KLF10, BTG2, BCL2, ATP6V0D1, TRIB1, ATP6V1C1, CTSB	18	2822	16792	2.97519	0.987987	0.280586	0.274799
GOTERM_BP_ALL	GO:0030641~regulation of cellular pH	3	16.6667	0.00366652	BCL2, ATP6V0D1, ATP6V1C1	18	90	16792	31.0963	0.988345	0.280586	0.274799
GOTERM_BP_ALL	GO:0071310~cellular response to organic substance	8	44.4444	0.00370411	ROBO2, CCR1, KLF10, BCL2, ATP6V0D1, TRIB1, ATP6V1C1, CTSB	18	2186	16792	3.41405	0.988866	0.280586	0.274799
GOTERM_BP_ALL	GO:0006885~regulation of pH	3	16.6667	0.00424481	BCL2, ATP6V0D1, ATP6V1C1	18	97	16792	28.8522	0.994233	0.292973	0.28693
GOTERM_BP_ALL	GO:0030154~cell differentiation	10	55.5556	0.00469583	ROBO2, CCR1, KLF10, ZHX2, PARD6B, BTG2, BCL2, TRIB1, MTSS1, CTSB	18	3652	16792	2.55446	0.99667	0.292973	0.28693
GOTERM_BP_ALL	GO:0006950~response to stress	10	55.5556	0.0049289	CCR1, KLF10, BTG2, PHLPP1, USP3, BCL2, ATP6V0D1, TRIB1, MTSS1, CTSB	18	3677	16792	2.53709	0.997493	0.292973	0.28693
GOTERM_BP_ALL	GO:2000026~regulation of multicellular organismal development	7	38.8889	0.00524981	ROBO2, CCR1, KLF10, ZHX2, PHLPP1, BCL2, TRIB1	18	1721	16792	3.79443	0.998304	0.292973	0.28693
GOTERM_BP_ALL	GO:0030004~cellular monovalent inorganic cation homeostasis	3	16.6667	0.00542352	BCL2, ATP6V0D1, ATP6V1C1	18	110	16792	25.4424	0.998628	0.292973	0.28693
GOTERM_BP_ALL	GO:0051093~negative regulation of developmental process	5	27.7778	0.00559668	ROBO2, CCR1, ZHX2, BCL2, TRIB1	18	739	16792	6.31183	0.998889	0.292973	0.28693
GOTERM_BP_ALL	GO:0002761~regulation of myeloid leukocyte differentiation	3	16.6667	0.00571458	CCR1, KLF10, TRIB1	18	113	16792	24.767	0.999037	0.292973	0.28693
GOTERM_BP_ALL	GO:0009888~tissue development	7	38.8889	0.00580145	ROBO2, CCR1, KLF10, BTG2, BCL2, MTSS1, CTSB	18	1756	16792	3.71881	0.999134	0.292973	0.28693
GOTERM_BP_ALL	GO:0040012~regulation of locomotion	5	27.7778	0.00641209	ROBO2, CCR1, PARD6B, BCL2, TRIB1	18	768	16792	6.0735	0.999589	0.294654	0.288576
GOTERM_BP_ALL	GO:0048856~anatomical structure development	12	66.6667	0.00659692	ROBO2, CCR1, KLF10, ZHX2, PARD6B, BTG2, PHLPP1, BCL2, ATP6V0D1, TRIB1, MTSS1, CTSB	18	5473	16792	2.04544	0.999672	0.294654	0.288576
GOTERM_BP_ALL	GO:0044767~single-organism developmental process	12	66.6667	0.00661747	ROBO2, CCR1, KLF10, ZHX2, PARD6B, BTG2, PHLPP1, BCL2, ATP6V0D1, TRIB1, MTSS1, CTSB	18	5475	16792	2.04469	0.99968	0.294654	0.288576
GOTERM_BP_ALL	GO:0048513~animal organ development	9	50	0.00702967	ROBO2, CCR1, KLF10, BTG2, BCL2, ATP6V0D1, TRIB1, MTSS1, CTSB	18	3129	16792	2.68329	0.999806	0.294654	0.288576
GOTERM_BP_ALL	GO:0010243~response to organonitrogen compound	5	27.7778	0.0070503	KLF10, BTG2, BCL2, ATP6V0D1, ATP6V1C1	18	789	16792	5.91184	0.999811	0.294654	0.288576
GOTERM_BP_ALL	GO:1902107~positive regulation of leukocyte differentiation	3	16.6667	0.00760786	CCR1, KLF10, TRIB1	18	131	16792	21.3639	0.999904	0.303236	0.296981
GOTERM_BP_ALL	GO:0030030~cell projection organization	6	33.3333	0.00779355	ROBO2, PARD6B, BTG2, BCL2, ATP6V0D1, MTSS1	18	1301	16792	4.30233	0.999924	0.303236	0.296981
GOTERM_BP_ALL	GO:0002520~immune system development	5	27.7778	0.0081029	CCR1, KLF10, PHLPP1, BCL2, TRIB1	18	821	16792	5.68142	0.999948	0.303236	0.296981
GOTERM_BP_ALL	GO:0032502~developmental process	12	66.6667	0.00840606	ROBO2, CCR1, KLF10, ZHX2, PARD6B, BTG2, PHLPP1, BCL2, ATP6V0D1, TRIB1, MTSS1, CTSB	18	5632	16792	1.98769	0.999964	0.303236	0.296981
GOTERM_BP_ALL	GO:0045597~positive regulation of cell differentiation	5	27.7778	0.0088115	ROBO2, CCR1, KLF10, BCL2, TRIB1	18	841	16792	5.54631	0.999978	0.303236	0.296981
GOTERM_BP_ALL	GO:0072073~kidney epithelium development	3	16.6667	0.00900701	ROBO2, BCL2, MTSS1	18	143	16792	19.5711	0.999983	0.303236	0.296981
GOTERM_BP_ALL	GO:0055067~monovalent inorganic cation homeostasis	3	16.6667	0.00900701	BCL2, ATP6V0D1, ATP6V1C1	18	143	16792	19.5711	0.999983	0.303236	0.296981
GOTERM_BP_ALL	GO:1901652~response to peptide	4	22.2222	0.00947454	KLF10, BTG2, ATP6V0D1, ATP6V1C1	18	444	16792	8.4044	0.99999	0.310355	0.303953
GOTERM_BP_ALL	GO:0002682~regulation of immune system process	6	33.3333	0.00990804	CCR1, KLF10, PHLPP1, BCL2, TRIB1, CTSB	18	1378	16792	4.06193	0.999994	0.316014	0.309496
GOTERM_BP_ALL	GO:0070887~cellular response to chemical stimulus	8	44.4444	0.0108572	ROBO2, CCR1, KLF10, BCL2, ATP6V0D1, TRIB1, ATP6V1C1, CTSB	18	2648	16792	2.8184	0.999998	0.326244	0.319515
GOTERM_BP_ALL	GO:1901698~response to nitrogen compound	5	27.7778	0.0109281	KLF10, BTG2, BCL2, ATP6V0D1, ATP6V1C1	18	895	16792	5.21167	0.999998	0.326244	0.319515
GOTERM_BP_ALL	GO:0002521~leukocyte differentiation	4	22.2222	0.0113179	CCR1, KLF10, BCL2, TRIB1	18	474	16792	7.87248	0.999999	0.326244	0.319515
GOTERM_BP_ALL	GO:0007166~cell surface receptor signaling pathway	8	44.4444	0.0113345	ROBO2, CCR1, KLF10, BCL2, ATP6V0D1, TRIB1, ATP6V1C1, MTSS1	18	2669	16792	2.79622	0.999999	0.326244	0.319515
GOTERM_BP_ALL	GO:1903708~positive regulation of hemopoiesis	3	16.6667	0.0115747	CCR1, KLF10, TRIB1	18	163	16792	17.1697	0.999999	0.326244	0.319515
GOTERM_BP_ALL	GO:1901700~response to oxygen-containing compound	6	33.3333	0.0127873	KLF10, BTG2, BCL2, ATP6V0D1, TRIB1, ATP6V1C1	18	1466	16792	3.8181	1	0.346209	0.339068
GOTERM_BP_ALL	GO:0009605~response to external stimulus	7	38.8889	0.0129772	ROBO2, CCR1, KLF10, BTG2, PHLPP1, BCL2, TRIB1	18	2073	16792	3.15013	1	0.346209	0.339068
GOTERM_BP_ALL	GO:0044707~single-multicellular organism process	12	66.6667	0.0131399	ROBO2, CCR1, KLF10, ZHX2, PARD6B, BTG2, PHLPP1, BCL2, ATP6V0D1, TRIB1, MTSS1, CTSB	18	5943	16792	1.88367	1	0.346209	0.339068
GOTERM_BP_ALL	GO:0002684~positive regulation of immune system process	5	27.7778	0.01389	CCR1, KLF10, BCL2, TRIB1, CTSB	18	960	16792	4.8588	1	0.358184	0.350796
GOTERM_BP_ALL	GO:0044265~cellular macromolecule catabolic process	5	27.7778	0.0146915	ZHX2, BTG2, USP3, TRIB1, CTSB	18	976	16792	4.77914	1	0.364079	0.356569
GOTERM_BP_ALL	GO:0050793~regulation of developmental process	7	38.8889	0.0147194	ROBO2, CCR1, KLF10, ZHX2, PHLPP1, BCL2, TRIB1	18	2129	16792	3.06727	1	0.364079	0.356569
GOTERM_BP_ALL	GO:0045637~regulation of myeloid cell differentiation	3	16.6667	0.0156455	CCR1, KLF10, TRIB1	18	191	16792	14.6527	1	0.370406	0.362765
GOTERM_BP_ALL	GO:0045595~regulation of cell differentiation	6	33.3333	0.0157881	ROBO2, CCR1, KLF10, ZHX2, BCL2, TRIB1	18	1544	16792	3.62522	1	0.370406	0.362765
GOTERM_BP_ALL	GO:0032501~multicellular organismal process	13	72.2222	0.015892	ROBO2, CCR1, KLF10, ZHX2, BTG2, PHLPP1, MTSS1, PARD6B, BCL2, TRIB1, ATP6V0D1, SNTB1, CTSB	18	7027	16792	1.72585	1	0.370406	0.362765
GOTERM_BP_ALL	GO:0002573~myeloid leukocyte differentiation	3	16.6667	0.0162708	CCR1, KLF10, TRIB1	18	195	16792	14.3521	1	0.372079	0.364405
GOTERM_BP_ALL	GO:0051241~negative regulation of multicellular organismal process	5	27.7778	0.016881	ROBO2, CCR1, ZHX2, BCL2, TRIB1	18	1017	16792	4.58647	1	0.378884	0.371069
GOTERM_BP_ALL	GO:0030003~cellular cation homeostasis	4	22.2222	0.018812	CCR1, BCL2, ATP6V0D1, ATP6V1C1	18	573	16792	6.51231	1	0.414548	0.405997
GOTERM_BP_ALL	GO:0006873~cellular ion homeostasis	4	22.2222	0.0201409	CCR1, BCL2, ATP6V0D1, ATP6V1C1	18	588	16792	6.34618	1	0.435907	0.426916
GOTERM_BP_ALL	GO:0051094~positive regulation of developmental process	5	27.7778	0.0212128	ROBO2, CCR1, KLF10, BCL2, TRIB1	18	1089	16792	4.28324	1	0.451051	0.441747
GOTERM_BP_ALL	GO:0045672~positive regulation of osteoclast differentiation	2	11.1111	0.022051	CCR1, KLF10	18	22	16792	84.8081	1	0.46079	0.451285
GOTERM_BP_ALL	GO:0032870~cellular response to hormone stimulus	4	22.2222	0.02276	ROBO2, ATP6V0D1, ATP6V1C1, CTSB	18	616	16792	6.05772	1	0.467544	0.4579
GOTERM_BP_ALL	GO:0048519~negative regulation of biological process	10	55.5556	0.0233589	ROBO2, CCR1, KLF10, ZHX2, BTG2, PHLPP1, USP3, BCL2, TRIB1, MTSS1	18	4623	16792	2.01793	1	0.471851	0.462118
GOTERM_BP_ALL	GO:1902105~regulation of leukocyte differentiation	3	16.6667	0.024773	CCR1, KLF10, TRIB1	18	244	16792	11.4699	1	0.492211	0.482058
GOTERM_BP_ALL	GO:0055080~cation homeostasis	4	22.2222	0.0254569	CCR1, BCL2, ATP6V0D1, ATP6V1C1	18	643	16792	5.80335	1	0.497642	0.487377
GOTERM_BP_ALL	GO:0090383~phagosome acidification	2	11.1111	0.0269983	ATP6V0D1, ATP6V1C1	18	27	16792	69.1029	1	0.503332	0.492949
GOTERM_BP_ALL	GO:0098771~inorganic ion homeostasis	4	22.2222	0.0270281	CCR1, BCL2, ATP6V0D1, ATP6V1C1	18	658	16792	5.67106	1	0.503332	0.492949
GOTERM_BP_ALL	GO:0040013~negative regulation of locomotion	3	16.6667	0.0274753	ROBO2, BCL2, TRIB1	18	258	16792	10.8475	1	0.503332	0.492949
GOTERM_BP_ALL	GO:0071495~cellular response to endogenous stimulus	5	27.7778	0.0279977	ROBO2, KLF10, ATP6V0D1, ATP6V1C1, CTSB	18	1185	16792	3.93624	1	0.503332	0.492949
GOTERM_BP_ALL	GO:0006928~movement of cell or subcellular component	6	33.3333	0.0286671	ROBO2, CCR1, PARD6B, BCL2, TRIB1, MTSS1	18	1795	16792	3.11829	1	0.503332	0.492949
GOTERM_BP_ALL	GO:0009057~macromolecule catabolic process	5	27.7778	0.0292443	ZHX2, BTG2, USP3, TRIB1, CTSB	18	1201	16792	3.8838	1	0.503332	0.492949
GOTERM_BP_ALL	GO:0001822~kidney development	3	16.6667	0.0292734	ROBO2, BCL2, MTSS1	18	267	16792	10.4819	1	0.503332	0.492949
GOTERM_BP_ALL	GO:0010506~regulation of autophagy	3	16.6667	0.0296794	BCL2, ATP6V0D1, ATP6V1C1	18	269	16792	10.404	1	0.503332	0.492949
GOTERM_BP_ALL	GO:0007420~brain development	4	22.2222	0.0298751	ROBO2, BTG2, BCL2, ATP6V0D1	18	684	16792	5.45549	1	0.503332	0.492949
GOTERM_BP_ALL	GO:0030334~regulation of cell migration	4	22.2222	0.0299877	CCR1, PARD6B, BCL2, TRIB1	18	685	16792	5.44753	1	0.503332	0.492949
GOTERM_BP_ALL	GO:0030182~neuron differentiation	5	27.7778	0.0312596	ROBO2, ZHX2, PARD6B, BTG2, BCL2	18	1226	16792	3.8046	1	0.503332	0.492949
GOTERM_BP_ALL	GO:0050801~ion homeostasis	4	22.2222	0.0315888	CCR1, BCL2, ATP6V0D1, ATP6V1C1	18	699	16792	5.33842	1	0.503332	0.492949
GOTERM_BP_ALL	GO:0015991~ATP hydrolysis coupled proton transport	2	11.1111	0.0319221	ATP6V0D1, ATP6V1C1	18	32	16792	58.3056	1	0.503332	0.492949
GOTERM_BP_ALL	GO:0015988~energy coupled proton transmembrane transport, against electrochemical gradient	2	11.1111	0.0319221	ATP6V0D1, ATP6V1C1	18	32	16792	58.3056	1	0.503332	0.492949
GOTERM_BP_ALL	GO:0009892~negative regulation of metabolic process	7	38.8889	0.0319773	CCR1, KLF10, ZHX2, BTG2, USP3, BCL2, TRIB1	18	2522	16792	2.5893	1	0.503332	0.492949
GOTERM_BP_ALL	GO:0072001~renal system development	3	16.6667	0.0325847	ROBO2, BCL2, MTSS1	18	283	16792	9.88928	1	0.506315	0.495872
GOTERM_BP_ALL	GO:0055082~cellular chemical homeostasis	4	22.2222	0.0332352	CCR1, BCL2, ATP6V0D1, ATP6V1C1	18	713	16792	5.2336	1	0.509868	0.499351
GOTERM_BP_ALL	GO:0007165~signal transduction	11	61.1111	0.0338858	ROBO2, CCR1, KLF10, BTG2, PHLPP1, BCL2, ATP6V0D1, TRIB1, ATP6V1C1, MTSS1, CTSB	18	5775	16792	1.77693	1	0.509868	0.499351
GOTERM_BP_ALL	GO:0060322~head development	4	22.2222	0.0340754	ROBO2, BTG2, BCL2, ATP6V0D1	18	720	16792	5.18272	1	0.509868	0.499351
GOTERM_BP_ALL	GO:0033572~transferrin transport	2	11.1111	0.0348651	ATP6V0D1, ATP6V1C1	18	35	16792	53.3079	1	0.513167	0.502582
GOTERM_BP_ALL	GO:0090662~ATP hydrolysis coupled transmembrane transport	2	11.1111	0.0358443	ATP6V0D1, ATP6V1C1	18	36	16792	51.8272	1	0.513167	0.502582
GOTERM_BP_ALL	GO:0042221~response to chemical	9	50	0.0360258	ROBO2, CCR1, KLF10, BTG2, BCL2, ATP6V0D1, TRIB1, ATP6V1C1, CTSB	18	4117	16792	2.03935	1	0.513167	0.502582
GOTERM_BP_ALL	GO:2000145~regulation of cell motility	4	22.2222	0.0360383	CCR1, PARD6B, BCL2, TRIB1	18	736	16792	5.07005	1	0.513167	0.502582
GOTERM_BP_ALL	GO:0030097~hemopoiesis	4	22.2222	0.0364129	CCR1, KLF10, BCL2, TRIB1	18	739	16792	5.04947	1	0.513167	0.502582
GOTERM_BP_ALL	GO:0000122~negative regulation of transcription from RNA polymerase II promoter	4	22.2222	0.0375491	KLF10, ZHX2, BTG2, USP3	18	748	16792	4.98871	1	0.520605	0.509867
GOTERM_BP_ALL	GO:0090382~phagosome maturation	2	11.1111	0.0377997	ATP6V0D1, ATP6V1C1	18	38	16792	49.0994	1	0.520605	0.509867
GOTERM_BP_ALL	GO:0015682~ferric iron transport	2	11.1111	0.0387761	ATP6V0D1, ATP6V1C1	18	39	16792	47.8405	1	0.522184	0.511413
GOTERM_BP_ALL	GO:0072512~trivalent inorganic cation transport	2	11.1111	0.0387761	ATP6V0D1, ATP6V1C1	18	39	16792	47.8405	1	0.522184	0.511413
GOTERM_BP_ALL	GO:1901653~cellular response to peptide	3	16.6667	0.0396295	KLF10, ATP6V0D1, ATP6V1C1	18	315	16792	8.88466	1	0.525792	0.514946
GOTERM_BP_ALL	GO:0051239~regulation of multicellular organismal process	7	38.8889	0.0403538	ROBO2, CCR1, KLF10, ZHX2, PHLPP1, BCL2, TRIB1	18	2659	16792	2.45589	1	0.525792	0.514946
GOTERM_BP_ALL	GO:0048468~cell development	6	33.3333	0.0407349	ROBO2, ZHX2, PARD6B, BTG2, BCL2, TRIB1	18	1968	16792	2.84417	1	0.525792	0.514946
GOTERM_BP_ALL	GO:0001655~urogenital system development	3	16.6667	0.0407792	ROBO2, BCL2, MTSS1	18	320	16792	8.74583	1	0.525792	0.514946
GOTERM_BP_ALL	GO:0048534~hematopoietic or lymphoid organ development	4	22.2222	0.0414707	CCR1, KLF10, BCL2, TRIB1	18	778	16792	4.79634	1	0.529079	0.518166
GOTERM_BP_ALL	GO:1903706~regulation of hemopoiesis	3	16.6667	0.0426454	CCR1, KLF10, TRIB1	18	328	16792	8.53252	1	0.538398	0.527293
GOTERM_BP_ALL	GO:0048699~generation of neurons	5	27.7778	0.0431909	ROBO2, ZHX2, PARD6B, BTG2, BCL2	18	1357	16792	3.43732	1	0.539409	0.528283
GOTERM_BP_ALL	GO:0051716~cellular response to stimulus	12	66.6667	0.0438834	ROBO2, CCR1, KLF10, BTG2, PHLPP1, USP3, BCL2, ATP6V0D1, TRIB1, ATP6V1C1, MTSS1, CTSB	18	6927	16792	1.61609	1	0.539409	0.528283
GOTERM_BP_ALL	GO:0048858~cell projection morphogenesis	4	22.2222	0.0440606	ROBO2, PARD6B, BCL2, ATP6V0D1	18	797	16792	4.682	1	0.539409	0.528283
GOTERM_BP_ALL	GO:0051270~regulation of cellular component movement	4	22.2222	0.0447558	CCR1, PARD6B, BCL2, TRIB1	18	802	16792	4.65281	1	0.541074	0.529913
GOTERM_BP_ALL	GO:0048523~negative regulation of cellular process	9	50	0.0458332	ROBO2, KLF10, ZHX2, BTG2, PHLPP1, USP3, BCL2, TRIB1, MTSS1	18	4300	16792	1.95256	1	0.541074	0.529913
GOTERM_BP_ALL	GO:0030099~myeloid cell differentiation	3	16.6667	0.046231	CCR1, KLF10, TRIB1	18	343	16792	8.15938	1	0.541074	0.529913
GOTERM_BP_ALL	GO:0030001~metal ion transport	4	22.2222	0.0464473	CCR1, BCL2, ATP6V0D1, ATP6V1C1	18	814	16792	4.58422	1	0.541074	0.529913
GOTERM_BP_ALL	GO:0031175~neuron projection development	4	22.2222	0.0468752	ROBO2, PARD6B, BTG2, BCL2	18	817	16792	4.56739	1	0.541074	0.529913
GOTERM_BP_ALL	GO:0032990~cell part morphogenesis	4	22.2222	0.0468752	ROBO2, PARD6B, BCL2, ATP6V0D1	18	817	16792	4.56739	1	0.541074	0.529913
GOTERM_BP_ALL	GO:0019725~cellular homeostasis	4	22.2222	0.0491918	CCR1, BCL2, ATP6V0D1, ATP6V1C1	18	833	16792	4.47966	1	0.562457	0.550855

## Sheet: SUPER.EC12
Category	Term	Count	%	PValue	Genes	List Total	Pop Hits	Pop Total	Fold Enrichment	Bonferroni	Benjamini	FDR
GOTERM_BP_ALL	GO:0050729~positive regulation of inflammatory response	7	15.2174	5.71974e-07	NLRP12, CCL5, IL1B, OSM, CCL3, S100A12, S100A8	45	117	16792	22.3255	0.0014312	0.00134682	0.00123817
GOTERM_BP_ALL	GO:0016477~cell migration	15	32.6087	1.07574e-06	SCARB1, LYST, SLC9A1, NLRP12, PSTPIP1, MYC, IL1B, CCL5, DDIT4, CCL3, MYADM, S100A12, TRIB1, S100A8, MARK1	45	1184	16792	4.72748	0.00269002	0.00134682	0.00123817
GOTERM_BP_ALL	GO:0009607~response to biotic stimulus	13	28.2609	1.63011e-06	SCARB1, LYST, MYC, IL1B, CCL5, DDIT4, CCL3, IRF8, S100A12, PTX3, TRIB1, S100A8, IFNAR1	45	873	16792	5.55673	0.00407347	0.0013606	0.00125083
GOTERM_BP_ALL	GO:0070887~cellular response to chemical stimulus	21	45.6522	3.15839e-06	ROBO2, SCARB1, ACSL1, OSM, LYST, SLC9A1, PTPRE, NLRP12, MYC, IL1B, CCL5, DDIT4, CCL3, IRF8, PMEPA1, S100A12, TRIB1, ATP6V0D1, S100A8, CTSB, IFNAR1	45	2648	16792	2.95932	0.00787742	0.00152574	0.00140266
GOTERM_BP_ALL	GO:0040011~locomotion	16	34.7826	4.16582e-06	ROBO2, SCARB1, LYST, SLC9A1, NLRP12, PSTPIP1, MYC, IL1B, CCL5, DDIT4, CCL3, MYADM, S100A12, TRIB1, S100A8, MARK1	45	1530	16792	3.90228	0.010377	0.00152574	0.00140266
GOTERM_BP_ALL	GO:0051674~localization of cell	15	32.6087	4.26525e-06	SCARB1, LYST, SLC9A1, NLRP12, PSTPIP1, MYC, IL1B, CCL5, DDIT4, CCL3, MYADM, S100A12, TRIB1, S100A8, MARK1	45	1330	16792	4.20852	0.0106234	0.00152574	0.00140266
GOTERM_BP_ALL	GO:0048870~cell motility	15	32.6087	4.26525e-06	SCARB1, LYST, SLC9A1, NLRP12, PSTPIP1, MYC, IL1B, CCL5, DDIT4, CCL3, MYADM, S100A12, TRIB1, S100A8, MARK1	45	1330	16792	4.20852	0.0106234	0.00152574	0.00140266
GOTERM_BP_ALL	GO:0051707~response to other organism	12	26.087	6.8115e-06	SCARB1, CCL5, IL1B, DDIT4, CCL3, IRF8, S100A12, PTX3, TRIB1, LYST, S100A8, IFNAR1	45	829	16792	5.40153	0.0169114	0.00172601	0.00158677
GOTERM_BP_ALL	GO:0043207~response to external biotic stimulus	12	26.087	6.8115e-06	SCARB1, CCL5, IL1B, DDIT4, CCL3, IRF8, S100A12, PTX3, TRIB1, LYST, S100A8, IFNAR1	45	829	16792	5.40153	0.0169114	0.00172601	0.00158677
GOTERM_BP_ALL	GO:0031663~lipopolysaccharide-mediated signaling pathway	5	10.8696	7.97112e-06	SCARB1, CCL5, IL1B, CCL3, TRIB1	45	49	16792	38.0771	0.0197619	0.00172601	0.00158677
GOTERM_BP_ALL	GO:0009605~response to external stimulus	18	39.1304	8.55691e-06	ROBO2, SCARB1, BTG2, ACSL1, OSM, LYST, SLC9A1, NLRP12, IL1B, CCL5, DDIT4, CCL3, IRF8, S100A12, PTX3, TRIB1, S100A8, IFNAR1	45	2073	16792	3.24014	0.0211987	0.00172601	0.00158677
GOTERM_BP_ALL	GO:0009617~response to bacterium	10	21.7391	9.47606e-06	SCARB1, CCL5, IL1B, CCL3, IRF8, S100A12, TRIB1, LYST, S100A8, IFNAR1	45	544	16792	6.85948	0.0234489	0.00172601	0.00158677
GOTERM_BP_ALL	GO:0006950~response to stress	24	52.1739	9.64573e-06	RBM38, SCARB1, BTG2, CPQ, USP3, OSM, ARHGEF10L, LYST, SLC9A1, NLRP12, PSTPIP1, MYC, IL1B, CCL5, DDIT4, CCL3, IRF8, S100A12, PTX3, TRIB1, ATP6V0D1, S100A8, CTSB, IFNAR1	45	3677	16792	2.43561	0.0238637	0.00172601	0.00158677
GOTERM_BP_ALL	GO:0033993~response to lipid	12	26.087	9.65023e-06	SCARB1, ACSL1, CCL5, MYC, IL1B, DDIT4, CCL3, IRF8, PMEPA1, TRIB1, S100A8, IFNAR1	45	860	16792	5.20682	0.0238747	0.00172601	0.00158677
GOTERM_BP_ALL	GO:0032496~response to lipopolysaccharide	8	17.3913	1.22964e-05	SCARB1, CCL5, IL1B, CCL3, IRF8, TRIB1, S100A8, IFNAR1	45	302	16792	9.88492	0.0303211	0.00205267	0.00188708
GOTERM_BP_ALL	GO:1901700~response to oxygen-containing compound	15	32.6087	1.31588e-05	SCARB1, BTG2, ACSL1, SLC9A1, PTPRE, MYC, IL1B, CCL5, DDIT4, CCL3, IRF8, TRIB1, ATP6V0D1, S100A8, IFNAR1	45	1466	16792	3.8181	0.0324129	0.00205935	0.00189322
GOTERM_BP_ALL	GO:0002237~response to molecule of bacterial origin	8	17.3913	1.64848e-05	SCARB1, CCL5, IL1B, CCL3, IRF8, TRIB1, S100A8, IFNAR1	45	316	16792	9.44698	0.040438	0.00238252	0.00219032
GOTERM_BP_ALL	GO:0071310~cellular response to organic substance	18	39.1304	1.74645e-05	ROBO2, SCARB1, ACSL1, OSM, SLC9A1, PTPRE, NLRP12, MYC, IL1B, CCL5, DDIT4, CCL3, IRF8, PMEPA1, TRIB1, ATP6V0D1, CTSB, IFNAR1	45	2186	16792	3.07264	0.0427891	0.00238252	0.00219032
GOTERM_BP_ALL	GO:0001932~regulation of protein phosphorylation	14	30.4348	1.80782e-05	ACSL1, OSM, NLRP12, MYC, IL1B, CCL5, DDIT4, CCL3, MYADM, PMEPA1, S100A12, TRIB1, CCNL1, IFNAR1	45	1300	16792	4.0186	0.044259	0.00238252	0.00219032
GOTERM_BP_ALL	GO:0006952~defense response	15	32.6087	1.95693e-05	OSM, LYST, NLRP12, PSTPIP1, MYC, IL1B, CCL5, DDIT4, CCL3, IRF8, S100A12, PTX3, S100A8, CTSB, IFNAR1	45	1518	16792	3.68731	0.0478207	0.00245007	0.00225242
GOTERM_BP_ALL	GO:0002376~immune system process	19	41.3043	2.0946e-05	CHD7, OSM, LYST, NLRP12, PSTPIP1, HLX, MYC, IL1B, CCL5, DDIT4, CCL3, IRF8, S100A12, PTX3, TRIB1, S100A8, LAIR1, CTSB, IFNAR1	45	2465	16792	2.87625	0.0510976	0.00249756	0.00229608
GOTERM_BP_ALL	GO:0006955~immune response	15	32.6087	2.49539e-05	OSM, LYST, PSTPIP1, HLX, MYC, IL1B, CCL5, CCL3, IRF8, S100A12, PTX3, S100A8, LAIR1, CTSB, IFNAR1	45	1551	16792	3.60885	0.0605731	0.00277267	0.00254899
GOTERM_BP_ALL	GO:0032870~cellular response to hormone stimulus	10	21.7391	2.54678e-05	ROBO2, PTPRE, ACSL1, MYC, IL1B, DDIT4, PMEPA1, ATP6V0D1, SLC9A1, CTSB	45	616	16792	6.05772	0.0617813	0.00277267	0.00254899
GOTERM_BP_ALL	GO:0006928~movement of cell or subcellular component	16	34.7826	2.89773e-05	ROBO2, SCARB1, LYST, SLC9A1, NLRP12, PSTPIP1, MYC, IL1B, CCL5, DDIT4, CCL3, MYADM, S100A12, TRIB1, S100A8, MARK1	45	1795	16792	3.32618	0.0699903	0.0030233	0.00277941
GOTERM_BP_ALL	GO:0010033~response to organic substance	20	43.4783	3.51127e-05	ROBO2, SCARB1, BTG2, ACSL1, OSM, SLC9A1, PTPRE, NLRP12, MYC, IL1B, CCL5, DDIT4, CCL3, IRF8, PMEPA1, TRIB1, ATP6V0D1, S100A8, CTSB, IFNAR1	45	2822	16792	2.64462	0.0841693	0.00351689	0.00323318
GOTERM_BP_ALL	GO:0042325~regulation of phosphorylation	14	30.4348	3.76069e-05	ACSL1, OSM, NLRP12, MYC, IL1B, CCL5, DDIT4, CCL3, MYADM, PMEPA1, S100A12, TRIB1, CCNL1, IFNAR1	45	1393	16792	3.75031	0.0898715	0.00362184	0.00332966
GOTERM_BP_ALL	GO:0071222~cellular response to lipopolysaccharide	6	13.0435	4.22594e-05	SCARB1, CCL5, IL1B, CCL3, IRF8, TRIB1	45	149	16792	15.0264	0.100413	0.00391917	0.00360301
GOTERM_BP_ALL	GO:0071396~cellular response to lipid	9	19.5652	4.57113e-05	SCARB1, CCL5, MYC, IL1B, DDIT4, CCL3, IRF8, PMEPA1, TRIB1	45	509	16792	6.59804	0.108156	0.00405394	0.0037269
GOTERM_BP_ALL	GO:0045087~innate immune response	11	23.913	4.69506e-05	PSTPIP1, CCL5, MYC, CCL3, IRF8, S100A12, PTX3, LYST, S100A8, CTSB, IFNAR1	45	836	16792	4.90994	0.110919	0.00405394	0.0037269
GOTERM_BP_ALL	GO:0071219~cellular response to molecule of bacterial origin	6	13.0435	5.1022e-05	SCARB1, CCL5, IL1B, CCL3, IRF8, TRIB1	45	155	16792	14.4447	0.119937	0.00425863	0.00391509
GOTERM_BP_ALL	GO:0009725~response to hormone	11	23.913	5.62068e-05	ROBO2, PTPRE, BTG2, ACSL1, MYC, IL1B, DDIT4, PMEPA1, ATP6V0D1, SLC9A1, CTSB	45	854	16792	4.80645	0.13129	0.00454006	0.00417381
GOTERM_BP_ALL	GO:0032103~positive regulation of response to external stimulus	7	15.2174	6.49502e-05	NLRP12, CCL5, IL1B, OSM, CCL3, S100A12, S100A8	45	267	16792	9.7831	0.150104	0.00508236	0.00467236
GOTERM_BP_ALL	GO:0030593~neutrophil chemotaxis	5	10.8696	6.79106e-05	CCL5, IL1B, CCL3, S100A12, S100A8	45	84	16792	22.2116	0.156381	0.00515298	0.00473728
GOTERM_BP_ALL	GO:0031349~positive regulation of defense response	8	17.3913	7.62956e-05	NLRP12, CCL5, IL1B, OSM, CCL3, S100A12, S100A8, CTSB	45	402	16792	7.42598	0.17391	0.00561895	0.00516566
GOTERM_BP_ALL	GO:0071216~cellular response to biotic stimulus	6	13.0435	9.07271e-05	SCARB1, CCL5, IL1B, CCL3, IRF8, TRIB1	45	175	16792	12.7939	0.203231	0.00649087	0.00596725
GOTERM_BP_ALL	GO:1901701~cellular response to oxygen-containing compound	11	23.913	9.74239e-05	SCARB1, PTPRE, CCL5, MYC, IL1B, DDIT4, CCL3, IRF8, ATP6V0D1, TRIB1, SLC9A1	45	912	16792	4.50078	0.216482	0.00677638	0.00622972
GOTERM_BP_ALL	GO:1990266~neutrophil migration	5	10.8696	0.000105307	CCL5, IL1B, CCL3, S100A12, S100A8	45	94	16792	19.8487	0.231798	0.00712673	0.00655181
GOTERM_BP_ALL	GO:0031325~positive regulation of cellular metabolic process	19	41.3043	0.00014236	SCARB1, BTG2, ACSL1, CHD7, OSM, ARHGEF10L, SLC9A1, NLRP12, MYC, IL1B, CCL5, CCL3, IRF8, S100A12, PTX3, TRIB1, CCNL1, S100A8, IFNAR1	45	2839	16792	2.49734	0.299875	0.0093808	0.00862404
GOTERM_BP_ALL	GO:0030595~leukocyte chemotaxis	6	13.0435	0.00014725	CCL5, IL1B, CCL3, S100A12, LYST, S100A8	45	194	16792	11.5409	0.308396	0.00939542	0.00863748
GOTERM_BP_ALL	GO:0071621~granulocyte chemotaxis	5	10.8696	0.000150087	CCL5, IL1B, CCL3, S100A12, S100A8	45	103	16792	18.1143	0.313291	0.00939542	0.00863748
GOTERM_BP_ALL	GO:0050896~response to stimulus	35	76.087	0.000156366	ROBO2, SCARB1, BTG2, CPQ, CHD7, ARHGEF10L, LYST, SLC9A1, PSTPIP1, HLX, MYC, CCL5, PSD4, CCL3, S100A12, PMEPA1, LAIR1, CTSB, MARK1, RBM38, ACSL1, USP3, OSM, PTPRE, NLRP12, IL1B, DDIT4, MYADM, IRF8, RIN3, PTX3, ATP6V0D1, TRIB1, S100A8, IFNAR1	45	8329	16792	1.56807	0.324006	0.00942831	0.00866772
GOTERM_BP_ALL	GO:0050727~regulation of inflammatory response	7	15.2174	0.000158143	NLRP12, CCL5, IL1B, OSM, CCL3, S100A12, S100A8	45	314	16792	8.31875	0.327007	0.00942831	0.00866772
GOTERM_BP_ALL	GO:0019220~regulation of phosphate metabolic process	14	30.4348	0.00016699	ACSL1, OSM, NLRP12, MYC, IL1B, CCL5, DDIT4, CCL3, MYADM, PMEPA1, S100A12, TRIB1, CCNL1, IFNAR1	45	1610	16792	3.24483	0.341755	0.00956288	0.00879143
GOTERM_BP_ALL	GO:0051174~regulation of phosphorus metabolic process	14	30.4348	0.000168038	ACSL1, OSM, NLRP12, MYC, IL1B, CCL5, DDIT4, CCL3, MYADM, PMEPA1, S100A12, TRIB1, CCNL1, IFNAR1	45	1611	16792	3.24282	0.34348	0.00956288	0.00879143
GOTERM_BP_ALL	GO:0006468~protein phosphorylation	15	32.6087	0.000174965	ACSL1, OSM, NLRP12, MYC, IL1B, CCL5, DDIT4, CCL3, MYADM, PMEPA1, S100A12, TRIB1, CCNL1, MARK1, IFNAR1	45	1852	16792	3.02232	0.354772	0.00973585	0.00895045
GOTERM_BP_ALL	GO:0035821~modification of morphology or physiology of other organism	5	10.8696	0.000207258	CCL5, MYC, CCL3, S100A12, PTX3	45	112	16792	16.6587	0.404901	0.0109805	0.0100947
GOTERM_BP_ALL	GO:0035556~intracellular signal transduction	18	39.1304	0.000215777	RBM38, BTG2, OSM, ARHGEF10L, SLC9A1, NLRP12, MYC, IL1B, CCL5, PSD4, DDIT4, CCL3, MYADM, S100A12, TRIB1, S100A8, MARK1, IFNAR1	45	2657	16792	2.52796	0.417464	0.0109805	0.0100947
GOTERM_BP_ALL	GO:0048522~positive regulation of cellular process	25	54.3478	0.000216803	ROBO2, SCARB1, BTG2, CHD7, ARHGEF10L, TRIOBP, SLC9A1, HLX, MYC, CCL5, CCL3, S100A12, CCNL1, RBM38, ACSL1, OSM, NLRP12, IL1B, DDIT4, MYADM, IRF8, PTX3, TRIB1, S100A8, IFNAR1	45	4744	16792	1.96646	0.418959	0.0109805	0.0100947
GOTERM_BP_ALL	GO:0006954~inflammatory response	9	19.5652	0.00021704	PSTPIP1, NLRP12, CCL5, IL1B, OSM, CCL3, S100A12, PTX3, S100A8	45	637	16792	5.27221	0.419303	0.0109805	0.0100947
GOTERM_BP_ALL	GO:0097530~granulocyte migration	5	10.8696	0.000221832	CCL5, IL1B, CCL3, S100A12, S100A8	45	114	16792	16.3665	0.426231	0.0109805	0.0100947
GOTERM_BP_ALL	GO:0042221~response to chemical	23	50	0.000224213	ROBO2, SCARB1, BTG2, ACSL1, CHD7, OSM, LYST, SLC9A1, PTPRE, NLRP12, MYC, IL1B, CCL5, DDIT4, CCL3, IRF8, PMEPA1, S100A12, TRIB1, ATP6V0D1, S100A8, CTSB, IFNAR1	45	4117	16792	2.08467	0.429642	0.0109805	0.0100947
GOTERM_BP_ALL	GO:0007165~signal transduction	28	60.8696	0.000229064	ROBO2, SCARB1, BTG2, ARHGEF10L, SLC9A1, PSTPIP1, MYC, CCL5, PSD4, CCL3, S100A12, PMEPA1, CTSB, MARK1, RBM38, ACSL1, OSM, PTPRE, NLRP12, IL1B, DDIT4, MYADM, IRF8, RIN3, ATP6V0D1, TRIB1, S100A8, IFNAR1	45	5775	16792	1.80924	0.436531	0.0109805	0.0100947
GOTERM_BP_ALL	GO:0031399~regulation of protein modification process	14	30.4348	0.000232416	ACSL1, OSM, NLRP12, MYC, IL1B, CCL5, DDIT4, CCL3, MYADM, PMEPA1, S100A12, TRIB1, CCNL1, IFNAR1	45	1664	16792	3.13953	0.44124	0.0109805	0.0100947
GOTERM_BP_ALL	GO:0044700~single organism signaling	29	63.0435	0.000291905	ROBO2, SCARB1, BTG2, CHD7, ARHGEF10L, SLC9A1, PSTPIP1, MYC, CCL5, PSD4, CCL3, S100A12, PMEPA1, CTSB, MARK1, RBM38, ACSL1, OSM, PTPRE, NLRP12, IL1B, DDIT4, MYADM, IRF8, RIN3, ATP6V0D1, TRIB1, S100A8, IFNAR1	45	6207	16792	1.74344	0.51859	0.0135357	0.0124438
GOTERM_BP_ALL	GO:1902531~regulation of intracellular signal transduction	14	30.4348	0.000311719	OSM, ARHGEF10L, SLC9A1, NLRP12, MYC, IL1B, CCL5, PSD4, DDIT4, CCL3, MYADM, S100A12, TRIB1, S100A8	45	1714	16792	3.04795	0.541899	0.0141917	0.0130468
GOTERM_BP_ALL	GO:0031347~regulation of defense response	9	19.5652	0.000324511	NLRP12, CCL5, IL1B, OSM, CCL3, S100A12, S100A8, CTSB, IFNAR1	45	676	16792	4.96805	0.556345	0.0145103	0.0133397
GOTERM_BP_ALL	GO:0023052~signaling	29	63.0435	0.000343942	ROBO2, SCARB1, BTG2, CHD7, ARHGEF10L, SLC9A1, PSTPIP1, MYC, CCL5, PSD4, CCL3, S100A12, PMEPA1, CTSB, MARK1, RBM38, ACSL1, OSM, PTPRE, NLRP12, IL1B, DDIT4, MYADM, IRF8, RIN3, ATP6V0D1, TRIB1, S100A8, IFNAR1	45	6260	16792	1.72868	0.577421	0.0149706	0.0137629
GOTERM_BP_ALL	GO:0016310~phosphorylation	16	34.7826	0.000346762	ACSL1, OSM, NLRP12, MYC, IL1B, CCL5, DDIT4, CCL3, MYADM, PMEPA1, S100A12, TK2, TRIB1, CCNL1, MARK1, IFNAR1	45	2229	16792	2.67855	0.580396	0.0149706	0.0137629
GOTERM_BP_ALL	GO:0007154~cell communication	29	63.0435	0.000360134	ROBO2, SCARB1, BTG2, CHD7, ARHGEF10L, SLC9A1, PSTPIP1, MYC, CCL5, PSD4, CCL3, S100A12, PMEPA1, CTSB, MARK1, RBM38, ACSL1, OSM, PTPRE, NLRP12, IL1B, DDIT4, MYADM, IRF8, RIN3, ATP6V0D1, TRIB1, S100A8, IFNAR1	45	6275	16792	1.72454	0.594218	0.0149939	0.0137843
GOTERM_BP_ALL	GO:0009893~positive regulation of metabolic process	19	41.3043	0.000363963	SCARB1, BTG2, ACSL1, CHD7, OSM, ARHGEF10L, SLC9A1, NLRP12, MYC, IL1B, CCL5, CCL3, IRF8, S100A12, PTX3, TRIB1, CCNL1, S100A8, IFNAR1	45	3052	16792	2.32305	0.598091	0.0149939	0.0137843
GOTERM_BP_ALL	GO:0048583~regulation of response to stimulus	21	45.6522	0.000365267	ROBO2, OSM, ARHGEF10L, SLC9A1, PTPRE, NLRP12, HLX, MYC, IL1B, CCL5, PSD4, DDIT4, CCL3, MYADM, PMEPA1, S100A12, TRIB1, S100A8, LAIR1, CTSB, IFNAR1	45	3636	16792	2.15519	0.599401	0.0149939	0.0137843
GOTERM_BP_ALL	GO:0050900~leukocyte migration	7	15.2174	0.000416503	NLRP12, CCL5, IL1B, CCL3, S100A12, LYST, S100A8	45	376	16792	6.94704	0.647654	0.0168213	0.0154644
GOTERM_BP_ALL	GO:0071345~cellular response to cytokine stimulus	9	19.5652	0.000434065	NLRP12, ACSL1, CCL5, MYC, IL1B, OSM, CCL3, IRF8, IFNAR1	45	706	16792	4.75694	0.662819	0.0171047	0.0157248
GOTERM_BP_ALL	GO:0048518~positive regulation of biological process	26	56.5217	0.00043718	ROBO2, SCARB1, BTG2, CHD7, ARHGEF10L, TRIOBP, SLC9A1, HLX, MYC, CCL5, CCL3, S100A12, CCNL1, CTSB, RBM38, ACSL1, OSM, NLRP12, IL1B, DDIT4, MYADM, IRF8, PTX3, TRIB1, S100A8, IFNAR1	45	5285	16792	1.83577	0.66544	0.0171047	0.0157248
GOTERM_BP_ALL	GO:0032611~interleukin-1 beta production	4	8.69565	0.000444948	NLRP12, IL1B, CCL3, IFNAR1	45	57	16792	26.1864	0.671887	0.0171408	0.015758
GOTERM_BP_ALL	GO:0060326~cell chemotaxis	6	13.0435	0.000483817	CCL5, IL1B, CCL3, S100A12, LYST, S100A8	45	251	16792	8.92005	0.70233	0.0183557	0.0168749
GOTERM_BP_ALL	GO:0043085~positive regulation of catalytic activity	13	28.2609	0.000496184	SCARB1, ACSL1, ARHGEF10L, NLRP12, MYC, IL1B, CCL5, PSD4, CCL3, S100A12, RIN3, CCNL1, S100A8	45	1559	16792	3.11162	0.711411	0.0183833	0.0169003
GOTERM_BP_ALL	GO:0032101~regulation of response to external stimulus	9	19.5652	0.000499228	ROBO2, NLRP12, CCL5, IL1B, OSM, CCL3, S100A12, TRIB1, S100A8	45	721	16792	4.65798	0.713604	0.0183833	0.0169003
GOTERM_BP_ALL	GO:0001933~negative regulation of protein phosphorylation	7	15.2174	0.000526287	NLRP12, MYC, IL1B, DDIT4, MYADM, PMEPA1, TRIB1	45	393	16792	6.64654	0.732376	0.0190989	0.0175582
GOTERM_BP_ALL	GO:0043412~macromolecule modification	22	47.8261	0.000574598	BTG2, ACSL1, USP3, CHD7, OSM, TRIOBP, PTPRE, NLRP12, MYC, IL1B, CCL5, DDIT4, CCL3, MYADM, PMEPA1, S100A12, TRIB1, LONRF1, CCNL1, S100A8, MARK1, IFNAR1	45	4065	16792	2.01954	0.762884	0.0205542	0.0188961
GOTERM_BP_ALL	GO:0032268~regulation of cellular protein metabolic process	16	34.7826	0.000605428	BTG2, ACSL1, OSM, NLRP12, MYC, IL1B, CCL5, DDIT4, CCL3, MYADM, PMEPA1, S100A12, TRIB1, CCNL1, S100A8, IFNAR1	45	2346	16792	2.54497	0.780511	0.021352	0.0196295
GOTERM_BP_ALL	GO:0044093~positive regulation of molecular function	14	30.4348	0.000622023	SCARB1, ACSL1, ARHGEF10L, SLC9A1, NLRP12, MYC, IL1B, CCL5, PSD4, CCL3, S100A12, RIN3, CCNL1, S100A8	45	1840	16792	2.83923	0.78945	0.0213531	0.0196305
GOTERM_BP_ALL	GO:0051171~regulation of nitrogen compound metabolic process	23	50	0.000622513	RBM38, SCARB1, ZHX2, BTG2, USP3, CHD7, OSM, ARHGEF10L, SLC9A1, NLRP12, HLX, MYC, IL1B, CCL5, DDIT4, CCL3, IRF8, S100A12, PTX3, TRIB1, CCNL1, S100A8, IFNAR1	45	4404	16792	1.94881	0.789708	0.0213531	0.0196305
GOTERM_BP_ALL	GO:0050790~regulation of catalytic activity	16	34.7826	0.000636687	SCARB1, ACSL1, ARHGEF10L, NLRP12, MYC, IL1B, CCL5, PSD4, CCL3, S100A12, PTX3, RIN3, TRIB1, CCNL1, S100A8, CTSB	45	2357	16792	2.53309	0.797045	0.0215441	0.0198061
GOTERM_BP_ALL	GO:0006464~cellular protein modification process	21	45.6522	0.000715325	BTG2, ACSL1, USP3, OSM, TRIOBP, PTPRE, NLRP12, MYC, IL1B, CCL5, DDIT4, CCL3, MYADM, PMEPA1, S100A12, TRIB1, LONRF1, CCNL1, S100A8, MARK1, IFNAR1	45	3818	16792	2.05245	0.833343	0.0235681	0.0216668
GOTERM_BP_ALL	GO:0036211~protein modification process	21	45.6522	0.000715325	BTG2, ACSL1, USP3, OSM, TRIOBP, PTPRE, NLRP12, MYC, IL1B, CCL5, DDIT4, CCL3, MYADM, PMEPA1, S100A12, TRIB1, LONRF1, CCNL1, S100A8, MARK1, IFNAR1	45	3818	16792	2.05245	0.833343	0.0235681	0.0216668
GOTERM_BP_ALL	GO:0043901~negative regulation of multi-organism process	5	10.8696	0.000746278	CCL5, CCL3, IRF8, PTX3, TRIB1	45	157	16792	11.8839	0.84578	0.0242686	0.0223108
GOTERM_BP_ALL	GO:0007166~cell surface receptor signaling pathway	17	36.9565	0.000762923	ROBO2, SCARB1, ACSL1, OSM, PTPRE, NLRP12, MYC, IL1B, CCL5, DDIT4, CCL3, IRF8, PMEPA1, TRIB1, ATP6V0D1, MARK1, IFNAR1	45	2669	16792	2.37679	0.852081	0.0244918	0.022516
GOTERM_BP_ALL	GO:0097529~myeloid leukocyte migration	5	10.8696	0.000782445	CCL5, IL1B, CCL3, S100A12, S100A8	45	159	16792	11.7345	0.859143	0.0247596	0.0227622
GOTERM_BP_ALL	GO:0071495~cellular response to endogenous stimulus	11	23.913	0.000801465	ROBO2, PTPRE, ACSL1, CCL5, MYC, IL1B, DDIT4, PMEPA1, ATP6V0D1, SLC9A1, CTSB	45	1185	16792	3.46389	0.865699	0.0247596	0.0227622
GOTERM_BP_ALL	GO:0065008~regulation of biological quality	20	43.4783	0.000806225	ROBO2, RBM38, SCARB1, CPQ, USP3, CHD7, OSM, TRIOBP, SLC9A1, POLA2, NLRP12, MYC, IL1B, CCL5, CCL3, MYADM, S100A12, PTX3, ATP6V0D1, S100A8	45	3548	16792	2.10347	0.867292	0.0247596	0.0227622
GOTERM_BP_ALL	GO:0042326~negative regulation of phosphorylation	7	15.2174	0.000822792	NLRP12, MYC, IL1B, DDIT4, MYADM, PMEPA1, TRIB1	45	428	16792	6.10301	0.872689	0.0247596	0.0227622
GOTERM_BP_ALL	GO:0051716~cellular response to stimulus	30	65.2174	0.000823228	ROBO2, SCARB1, BTG2, ARHGEF10L, LYST, SLC9A1, PSTPIP1, MYC, CCL5, PSD4, CCL3, S100A12, PMEPA1, CTSB, MARK1, RBM38, ACSL1, USP3, OSM, PTPRE, NLRP12, IL1B, DDIT4, MYADM, IRF8, RIN3, ATP6V0D1, TRIB1, S100A8, IFNAR1	45	6927	16792	1.61609	0.872828	0.0247596	0.0227622
GOTERM_BP_ALL	GO:0098602~single organism cell adhesion	9	19.5652	0.000830593	TTYH1, HLX, CCL5, IL1B, CHD7, MYADM, TRIOBP, S100A8, IFNAR1	45	779	16792	4.31117	0.875153	0.0247596	0.0227622
GOTERM_BP_ALL	GO:0032612~interleukin-1 production	4	8.69565	0.000882441	NLRP12, IL1B, CCL3, IFNAR1	45	72	16792	20.7309	0.890366	0.0259957	0.0238986
GOTERM_BP_ALL	GO:0050663~cytokine secretion	5	10.8696	0.000898381	NLRP12, IL1B, CCL3, S100A12, IFNAR1	45	165	16792	11.3077	0.894659	0.0261575	0.0240474
GOTERM_BP_ALL	GO:0051240~positive regulation of multicellular organismal process	12	26.087	0.000911839	ROBO2, SCARB1, NLRP12, HLX, MYC, IL1B, CHD7, CCL3, IRF8, TRIB1, SLC9A1, IFNAR1	45	1431	16792	3.12919	0.898153	0.0262442	0.024127
GOTERM_BP_ALL	GO:0010942~positive regulation of cell death	8	17.3913	0.000932187	NLRP12, CCL5, MYC, DDIT4, OSM, CCL3, S100A8, SLC9A1	45	607	16792	4.91803	0.903217	0.026525	0.0243852
GOTERM_BP_ALL	GO:0044419~interspecies interaction between organisms	10	21.7391	0.000959374	SCARB1, CCL5, MYC, DDIT4, CCL3, IRF8, PTX3, LYST, CTSB, IFNAR1	45	998	16792	3.73903	0.909592	0.0266919	0.0245387
GOTERM_BP_ALL	GO:0044403~symbiosis, encompassing mutualism through parasitism	10	21.7391	0.000959374	SCARB1, CCL5, MYC, DDIT4, CCL3, IRF8, PTX3, LYST, CTSB, IFNAR1	45	998	16792	3.73903	0.909592	0.0266919	0.0245387
GOTERM_BP_ALL	GO:0009966~regulation of signal transduction	17	36.9565	0.000974077	OSM, ARHGEF10L, SLC9A1, PTPRE, NLRP12, MYC, IL1B, CCL5, PSD4, DDIT4, CCL3, MYADM, PMEPA1, S100A12, TRIB1, S100A8, IFNAR1	45	2728	16792	2.32538	0.912863	0.0268032	0.0246409
GOTERM_BP_ALL	GO:0034097~response to cytokine	9	19.5652	0.00100344	NLRP12, ACSL1, CCL5, MYC, IL1B, OSM, CCL3, IRF8, IFNAR1	45	802	16792	4.18753	0.919045	0.0271439	0.0249542
GOTERM_BP_ALL	GO:0010646~regulation of cell communication	18	39.1304	0.00100814	CHD7, OSM, ARHGEF10L, SLC9A1, PTPRE, NLRP12, MYC, IL1B, CCL5, PSD4, DDIT4, CCL3, MYADM, PMEPA1, S100A12, TRIB1, S100A8, IFNAR1	45	3020	16792	2.22411	0.919994	0.0271439	0.0249542
GOTERM_BP_ALL	GO:0022610~biological adhesion	13	28.2609	0.00110674	ROBO2, SCARB1, TTYH1, CHD7, TRIOBP, SLC9A1, PSTPIP1, HLX, IL1B, CCL5, MYADM, S100A8, IFNAR1	45	1705	16792	2.84517	0.937514	0.0294816	0.0271033
GOTERM_BP_ALL	GO:0023051~regulation of signaling	18	39.1304	0.00121976	CHD7, OSM, ARHGEF10L, SLC9A1, PTPRE, NLRP12, MYC, IL1B, CCL5, PSD4, DDIT4, CCL3, MYADM, PMEPA1, S100A12, TRIB1, S100A8, IFNAR1	45	3070	16792	2.18788	0.952931	0.0321503	0.0295567
GOTERM_BP_ALL	GO:0051246~regulation of protein metabolic process	16	34.7826	0.00125006	BTG2, ACSL1, OSM, NLRP12, MYC, IL1B, CCL5, DDIT4, CCL3, MYADM, PMEPA1, S100A12, TRIB1, CCNL1, S100A8, IFNAR1	45	2512	16792	2.37679	0.956374	0.0326057	0.0299754
GOTERM_BP_ALL	GO:0048523~negative regulation of cellular process	22	47.8261	0.00126538	ROBO2, RBM38, ZHX2, BTG2, USP3, CHD7, OSM, TRIOBP, SLC9A1, PTPRE, NLRP12, HLX, MYC, IL1B, CCL5, DDIT4, CCL3, MYADM, IRF8, PMEPA1, PTX3, TRIB1	45	4300	16792	1.90917	0.958018	0.0326651	0.0300299
GOTERM_BP_ALL	GO:0032869~cellular response to insulin stimulus	5	10.8696	0.00145602	PTPRE, MYC, IL1B, ATP6V0D1, SLC9A1	45	188	16792	9.92435	0.973971	0.0366682	0.0337101
GOTERM_BP_ALL	GO:0009891~positive regulation of biosynthetic process	13	28.2609	0.00146136	SCARB1, CHD7, OSM, ARHGEF10L, SLC9A1, NLRP12, MYC, IL1B, CCL5, IRF8, PTX3, CCNL1, IFNAR1	45	1760	16792	2.75626	0.974317	0.0366682	0.0337101
GOTERM_BP_ALL	GO:0044765~single-organism transport	19	41.3043	0.00146438	SCARB1, ACSL1, TTYH1, CHD7, OSM, SLC9A1, POLA2, NLRP12, MYC, IL1B, CCL5, CCL3, MYADM, IRF8, S100A12, PTX3, ATP6V0D1, S100A8, IFNAR1	45	3415	16792	2.07612	0.974511	0.0366682	0.0337101
GOTERM_BP_ALL	GO:0050718~positive regulation of interleukin-1 beta secretion	3	6.52174	0.00149927	NLRP12, CCL3, IFNAR1	45	22	16792	50.8848	0.976646	0.03717	0.0341715
GOTERM_BP_ALL	GO:1902106~negative regulation of leukocyte differentiation	4	8.69565	0.00157701	HLX, MYC, CCL3, TRIB1	45	88	16792	16.9616	0.980783	0.038714	0.0355909
GOTERM_BP_ALL	GO:0010604~positive regulation of macromolecule metabolic process	17	36.9565	0.00161166	BTG2, ACSL1, CHD7, OSM, ARHGEF10L, SLC9A1, NLRP12, MYC, IL1B, CCL5, CCL3, IRF8, S100A12, TRIB1, CCNL1, S100A8, IFNAR1	45	2856	16792	2.22116	0.982383	0.0391807	0.0360199
GOTERM_BP_ALL	GO:0050716~positive regulation of interleukin-1 secretion	3	6.52174	0.00163933	NLRP12, CCL3, IFNAR1	45	23	16792	48.6725	0.983563	0.0394679	0.036284
GOTERM_BP_ALL	GO:0065009~regulation of molecular function	17	36.9565	0.001655	SCARB1, ACSL1, ARHGEF10L, SLC9A1, NLRP12, MYC, IL1B, CCL5, PSD4, CCL3, S100A12, PTX3, RIN3, TRIB1, CCNL1, S100A8, CTSB	45	2863	16792	2.21573	0.984197	0.0394679	0.036284
GOTERM_BP_ALL	GO:0051252~regulation of RNA metabolic process	20	43.4783	0.00169564	RBM38, ZHX2, BTG2, USP3, CHD7, OSM, ARHGEF10L, SLC9A1, NLRP12, HLX, MYC, IL1B, CCL5, CCL3, IRF8, S100A12, TRIB1, CCNL1, S100A8, IFNAR1	45	3762	16792	1.98381	0.985728	0.0400555	0.0368242
GOTERM_BP_ALL	GO:0009719~response to endogenous stimulus	12	26.087	0.00173563	ROBO2, PTPRE, BTG2, ACSL1, CCL5, MYC, IL1B, DDIT4, PMEPA1, ATP6V0D1, SLC9A1, CTSB	45	1548	16792	2.89268	0.987091	0.0403767	0.0371195
GOTERM_BP_ALL	GO:0051049~regulation of transport	13	28.2609	0.00174149	SCARB1, TTYH1, CHD7, OSM, SLC9A1, NLRP12, MYC, IL1B, CCL5, CCL3, PTX3, S100A8, IFNAR1	45	1796	16792	2.70101	0.987279	0.0403767	0.0371195
GOTERM_BP_ALL	GO:0043408~regulation of MAPK cascade	8	17.3913	0.0017668	NLRP12, CCL5, MYC, IL1B, OSM, CCL3, S100A12, TRIB1	45	678	16792	4.40302	0.988061	0.0405878	0.0373136
GOTERM_BP_ALL	GO:0051046~regulation of secretion	8	17.3913	0.0018424	NLRP12, CCL5, IL1B, CHD7, OSM, CCL3, S100A8, IFNAR1	45	683	16792	4.37078	0.990124	0.0414928	0.0381455
GOTERM_BP_ALL	GO:0051817~modification of morphology or physiology of other organism involved in symbiotic interaction	4	8.69565	0.00184796	CCL5, MYC, CCL3, PTX3	45	93	16792	16.0497	0.990261	0.0414928	0.0381455
GOTERM_BP_ALL	GO:0019219~regulation of nucleobase-containing compound metabolic process	21	45.6522	0.00186546	RBM38, ZHX2, BTG2, USP3, CHD7, OSM, ARHGEF10L, SLC9A1, NLRP12, HLX, MYC, IL1B, CCL5, DDIT4, CCL3, IRF8, S100A12, TRIB1, CCNL1, S100A8, IFNAR1	45	4104	16792	1.90942	0.990679	0.0414928	0.0381455
GOTERM_BP_ALL	GO:0046903~secretion	10	21.7391	0.00187248	NLRP12, CCL5, MYC, IL1B, CHD7, OSM, CCL3, S100A12, S100A8, IFNAR1	45	1098	16792	3.3985	0.990842	0.0414928	0.0381455
GOTERM_BP_ALL	GO:0050715~positive regulation of cytokine secretion	4	8.69565	0.00208442	NLRP12, IL1B, CCL3, IFNAR1	45	97	16792	15.3879	0.994619	0.0457841	0.0420906
GOTERM_BP_ALL	GO:0014070~response to organic cyclic compound	9	19.5652	0.00218193	BTG2, ACSL1, CCL5, MYC, IL1B, DDIT4, CCL3, PMEPA1, SLC9A1	45	906	16792	3.70684	0.995787	0.0475091	0.0436765
GOTERM_BP_ALL	GO:0071702~organic substance transport	16	34.7826	0.002226	SCARB1, ACSL1, CHD7, LYST, SLC9A1, POLA2, NLRP12, MYC, IL1B, CCL5, CCL3, MYADM, S100A12, ATP6V0D1, S100A8, IFNAR1	45	2657	16792	2.24708	0.996228	0.0476407	0.0437975
GOTERM_BP_ALL	GO:0071407~cellular response to organic cyclic compound	7	15.2174	0.00222602	CCL5, MYC, IL1B, DDIT4, CCL3, PMEPA1, SLC9A1	45	520	16792	5.02325	0.996228	0.0476407	0.0437975
GOTERM_BP_ALL	GO:0031323~regulation of cellular metabolic process	26	56.5217	0.00227016	SCARB1, BTG2, CHD7, ARHGEF10L, SLC9A1, HLX, MYC, CCL5, CCL3, S100A12, PMEPA1, CCNL1, RBM38, ZHX2, ACSL1, USP3, OSM, NLRP12, IL1B, DDIT4, MYADM, IRF8, PTX3, TRIB1, S100A8, IFNAR1	45	5844	16792	1.66017	0.996624	0.0481736	0.0442874
GOTERM_BP_ALL	GO:0048585~negative regulation of response to stimulus	11	23.913	0.00239259	ROBO2, PTPRE, NLRP12, HLX, CCL5, MYC, IL1B, DDIT4, MYADM, PMEPA1, TRIB1	45	1369	16792	2.99833	0.997517	0.0503449	0.0462835
GOTERM_BP_ALL	GO:0016337~single organismal cell-cell adhesion	8	17.3913	0.002582	TTYH1, HLX, CCL5, IL1B, CHD7, MYADM, S100A8, IFNAR1	45	725	16792	4.11758	0.998456	0.0538778	0.0495314
GOTERM_BP_ALL	GO:0050706~regulation of interleukin-1 beta secretion	3	6.52174	0.00260459	NLRP12, CCL3, IFNAR1	45	29	16792	38.6023	0.998542	0.0538999	0.0495517
GOTERM_BP_ALL	GO:0032731~positive regulation of interleukin-1 beta production	3	6.52174	0.002786	NLRP12, CCL3, IFNAR1	45	30	16792	37.3156	0.999075	0.0563078	0.0517654
GOTERM_BP_ALL	GO:0010563~negative regulation of phosphorus metabolic process	7	15.2174	0.0027884	NLRP12, MYC, IL1B, DDIT4, MYADM, PMEPA1, TRIB1	45	544	16792	4.80163	0.999081	0.0563078	0.0517654
GOTERM_BP_ALL	GO:0045936~negative regulation of phosphate metabolic process	7	15.2174	0.0027884	NLRP12, MYC, IL1B, DDIT4, MYADM, PMEPA1, TRIB1	45	544	16792	4.80163	0.999081	0.0563078	0.0517654
GOTERM_BP_ALL	GO:1902578~single-organism localization	19	41.3043	0.00285549	SCARB1, ACSL1, TTYH1, CHD7, OSM, SLC9A1, POLA2, NLRP12, MYC, IL1B, CCL5, CCL3, MYADM, IRF8, S100A12, PTX3, ATP6V0D1, S100A8, IFNAR1	45	3614	16792	1.9618	0.999223	0.0572012	0.0525867
GOTERM_BP_ALL	GO:0006935~chemotaxis	7	15.2174	0.00299781	ROBO2, CCL5, IL1B, CCL3, S100A12, LYST, S100A8	45	552	16792	4.73205	0.999457	0.0595755	0.0547695
GOTERM_BP_ALL	GO:0042330~taxis	7	15.2174	0.00302479	ROBO2, CCL5, IL1B, CCL3, S100A12, LYST, S100A8	45	553	16792	4.72349	0.999492	0.0596091	0.0548004
GOTERM_BP_ALL	GO:0019221~cytokine-mediated signaling pathway	7	15.2174	0.00305196	ACSL1, CCL5, IL1B, OSM, CCL3, IRF8, IFNAR1	45	554	16792	4.71496	0.999526	0.0596091	0.0548004
GOTERM_BP_ALL	GO:0010648~negative regulation of cell communication	10	21.7391	0.00309482	PTPRE, NLRP12, CCL5, MYC, IL1B, DDIT4, OSM, MYADM, PMEPA1, TRIB1	45	1182	16792	3.15698	0.999574	0.0596091	0.0548004
GOTERM_BP_ALL	GO:0032270~positive regulation of cellular protein metabolic process	11	23.913	0.00312874	NLRP12, ACSL1, CCL5, MYC, IL1B, OSM, CCL3, S100A12, CCNL1, TRIB1, S100A8	45	1420	16792	2.89064	0.999609	0.0596091	0.0548004
GOTERM_BP_ALL	GO:2001141~regulation of RNA biosynthetic process	19	41.3043	0.00314141	ZHX2, BTG2, USP3, CHD7, OSM, ARHGEF10L, SLC9A1, NLRP12, HLX, MYC, IL1B, CCL5, CCL3, IRF8, S100A12, TRIB1, CCNL1, S100A8, IFNAR1	45	3644	16792	1.94565	0.999621	0.0596091	0.0548004
GOTERM_BP_ALL	GO:0023057~negative regulation of signaling	10	21.7391	0.00316595	PTPRE, NLRP12, CCL5, MYC, IL1B, DDIT4, OSM, MYADM, PMEPA1, TRIB1	45	1186	16792	3.14634	0.999644	0.0596091	0.0548004
GOTERM_BP_ALL	GO:0050704~regulation of interleukin-1 secretion	3	6.52174	0.00316614	NLRP12, CCL3, IFNAR1	45	32	16792	34.9833	0.999644	0.0596091	0.0548004
GOTERM_BP_ALL	GO:0032879~regulation of localization	15	32.6087	0.00321797	SCARB1, TTYH1, CHD7, OSM, SLC9A1, NLRP12, MYC, IL1B, CCL5, CCL3, MYADM, PTX3, TRIB1, S100A8, IFNAR1	45	2473	16792	2.26338	0.999687	0.0598001	0.054976
GOTERM_BP_ALL	GO:0031326~regulation of cellular biosynthetic process	21	45.6522	0.00322662	SCARB1, ZHX2, BTG2, USP3, CHD7, OSM, ARHGEF10L, SLC9A1, NLRP12, HLX, MYC, IL1B, CCL5, CCL3, IRF8, S100A12, PTX3, TRIB1, CCNL1, S100A8, IFNAR1	45	4284	16792	1.82919	0.999694	0.0598001	0.054976
GOTERM_BP_ALL	GO:0016032~viral process	9	19.5652	0.00324793	SCARB1, CCL5, MYC, DDIT4, CCL3, PTX3, LYST, CTSB, IFNAR1	45	966	16792	3.4766	0.99971	0.0598001	0.054976
GOTERM_BP_ALL	GO:0048519~negative regulation of biological process	22	47.8261	0.00335097	ROBO2, RBM38, ZHX2, BTG2, USP3, CHD7, OSM, TRIOBP, SLC9A1, PTPRE, NLRP12, HLX, MYC, IL1B, CCL5, DDIT4, CCL3, MYADM, IRF8, PMEPA1, PTX3, TRIB1	45	4623	16792	1.77578	0.999776	0.061247	0.0563061
GOTERM_BP_ALL	GO:0044764~multi-organism cellular process	9	19.5652	0.00339505	SCARB1, CCL5, MYC, DDIT4, CCL3, PTX3, LYST, CTSB, IFNAR1	45	973	16792	3.45159	0.9998	0.0616029	0.0566333
GOTERM_BP_ALL	GO:0050702~interleukin-1 beta secretion	3	6.52174	0.00356918	NLRP12, CCL3, IFNAR1	45	34	16792	32.9255	0.999871	0.0635351	0.0584097
GOTERM_BP_ALL	GO:0043065~positive regulation of apoptotic process	7	15.2174	0.00357307	NLRP12, CCL5, MYC, OSM, CCL3, S100A8, SLC9A1	45	572	16792	4.56659	0.999872	0.0635351	0.0584097
GOTERM_BP_ALL	GO:0030003~cellular cation homeostasis	7	15.2174	0.00360386	CCL5, MYC, CHD7, CCL3, ATP6V0D1, S100A8, SLC9A1	45	573	16792	4.55862	0.999881	0.0635351	0.0584097
GOTERM_BP_ALL	GO:0007155~cell adhesion	12	26.087	0.00362656	ROBO2, PSTPIP1, TTYH1, HLX, CCL5, IL1B, CHD7, MYADM, TRIOBP, S100A8, SLC9A1, IFNAR1	45	1699	16792	2.63559	0.999888	0.0635351	0.0584097
GOTERM_BP_ALL	GO:0006796~phosphate-containing compound metabolic process	17	36.9565	0.0036284	ACSL1, OSM, PTPRE, NLRP12, MYC, IL1B, CCL5, DDIT4, CCL3, MYADM, PMEPA1, S100A12, TK2, TRIB1, CCNL1, MARK1, IFNAR1	45	3083	16792	2.05762	0.999889	0.0635351	0.0584097
GOTERM_BP_ALL	GO:0006793~phosphorus metabolic process	17	36.9565	0.00370224	ACSL1, OSM, PTPRE, NLRP12, MYC, IL1B, CCL5, DDIT4, CCL3, MYADM, PMEPA1, S100A12, TK2, TRIB1, CCNL1, MARK1, IFNAR1	45	3089	16792	2.05362	0.999907	0.063603	0.0584721
GOTERM_BP_ALL	GO:0043068~positive regulation of programmed cell death	7	15.2174	0.00372898	NLRP12, CCL5, MYC, OSM, CCL3, S100A8, SLC9A1	45	577	16792	4.52702	0.999913	0.063603	0.0584721
GOTERM_BP_ALL	GO:0032868~response to insulin	5	10.8696	0.00374332	PTPRE, MYC, IL1B, ATP6V0D1, SLC9A1	45	244	16792	7.64663	0.999917	0.063603	0.0584721
GOTERM_BP_ALL	GO:0006810~transport	22	47.8261	0.00374942	SCARB1, ACSL1, TTYH1, CHD7, OSM, LYST, SLC9A1, POLA2, NLRP12, PSTPIP1, MYC, IL1B, CCL5, CCL3, MYADM, IRF8, S100A12, PTX3, RIN3, ATP6V0D1, S100A8, IFNAR1	45	4663	16792	1.76055	0.999918	0.063603	0.0584721
GOTERM_BP_ALL	GO:0031400~negative regulation of protein modification process	7	15.2174	0.00376077	NLRP12, MYC, IL1B, DDIT4, MYADM, PMEPA1, TRIB1	45	578	16792	4.51918	0.99992	0.063603	0.0584721
GOTERM_BP_ALL	GO:0009889~regulation of biosynthetic process	21	45.6522	0.00378469	SCARB1, ZHX2, BTG2, USP3, CHD7, OSM, ARHGEF10L, SLC9A1, NLRP12, HLX, MYC, IL1B, CCL5, CCL3, IRF8, S100A12, PTX3, TRIB1, CCNL1, S100A8, IFNAR1	45	4339	16792	1.80601	0.999925	0.063603	0.0584721
GOTERM_BP_ALL	GO:0010468~regulation of gene expression	21	45.6522	0.0038503	RBM38, ZHX2, BTG2, USP3, CHD7, OSM, ARHGEF10L, SLC9A1, NLRP12, HLX, MYC, IL1B, CCL5, CCL3, MYADM, IRF8, S100A12, TRIB1, CCNL1, S100A8, IFNAR1	45	4345	16792	1.80351	0.999936	0.0642743	0.0590892
GOTERM_BP_ALL	GO:0043170~macromolecule metabolic process	34	73.913	0.0039332	SCARB1, BTG2, CPQ, CHD7, ARHGEF10L, TRIOBP, SLC9A1, HLX, MYC, CCL5, CCL3, S100A12, PMEPA1, TK2, LONRF1, CCNL1, CTSB, MARK1, RBM38, ZHX2, ACSL1, USP3, OSM, PTPRE, NLRP12, POLA2, IL1B, DDIT4, MYADM, IRF8, PTX3, TRIB1, S100A8, IFNAR1	45	9130	16792	1.38963	0.999948	0.0652234	0.0599617
GOTERM_BP_ALL	GO:0034654~nucleobase-containing compound biosynthetic process	21	45.6522	0.00398445	ZHX2, BTG2, USP3, CHD7, OSM, ARHGEF10L, SLC9A1, POLA2, NLRP12, HLX, MYC, IL1B, CCL5, CCL3, IRF8, S100A12, TK2, TRIB1, CCNL1, S100A8, IFNAR1	45	4357	16792	1.79855	0.999954	0.0653095	0.060041
GOTERM_BP_ALL	GO:0043434~response to peptide hormone	6	13.0435	0.00399056	PTPRE, BTG2, MYC, IL1B, ATP6V0D1, SLC9A1	45	405	16792	5.52823	0.999955	0.0653095	0.060041
GOTERM_BP_ALL	GO:0006873~cellular ion homeostasis	7	15.2174	0.00408985	CCL5, MYC, CHD7, CCL3, ATP6V0D1, S100A8, SLC9A1	45	588	16792	4.44233	0.999965	0.0664998	0.0611352
GOTERM_BP_ALL	GO:0031328~positive regulation of cellular biosynthetic process	12	26.087	0.00415194	SCARB1, CCL5, MYC, IL1B, CHD7, OSM, IRF8, ARHGEF10L, PTX3, CCNL1, SLC9A1, IFNAR1	45	1729	16792	2.58986	0.99997	0.0670739	0.061663
GOTERM_BP_ALL	GO:0032732~positive regulation of interleukin-1 production	3	6.52174	0.00421617	NLRP12, CCL3, IFNAR1	45	37	16792	30.2559	0.999975	0.0676749	0.0622155
GOTERM_BP_ALL	GO:0044260~cellular macromolecule metabolic process	32	69.5652	0.00463728	BTG2, CHD7, ARHGEF10L, TRIOBP, SLC9A1, HLX, MYC, CCL5, CCL3, S100A12, PMEPA1, TK2, LONRF1, CCNL1, CTSB, MARK1, RBM38, ZHX2, ACSL1, USP3, OSM, PTPRE, NLRP12, POLA2, IL1B, DDIT4, MYADM, IRF8, PTX3, TRIB1, S100A8, IFNAR1	45	8387	16792	1.42375	0.999991	0.0735161	0.0675854
GOTERM_BP_ALL	GO:0018130~heterocycle biosynthetic process	21	45.6522	0.00463879	ZHX2, BTG2, USP3, CHD7, OSM, ARHGEF10L, SLC9A1, POLA2, NLRP12, HLX, MYC, IL1B, CCL5, CCL3, IRF8, S100A12, TK2, TRIB1, CCNL1, S100A8, IFNAR1	45	4411	16792	1.77653	0.999991	0.0735161	0.0675854
GOTERM_BP_ALL	GO:0019438~aromatic compound biosynthetic process	21	45.6522	0.00480935	ZHX2, BTG2, USP3, CHD7, OSM, ARHGEF10L, SLC9A1, POLA2, NLRP12, HLX, MYC, IL1B, CCL5, CCL3, IRF8, S100A12, TK2, TRIB1, CCNL1, S100A8, IFNAR1	45	4424	16792	1.77131	0.999994	0.075345	0.0692669
GOTERM_BP_ALL	GO:0051247~positive regulation of protein metabolic process	11	23.913	0.00482172	NLRP12, ACSL1, CCL5, MYC, IL1B, OSM, CCL3, S100A12, CCNL1, TRIB1, S100A8	45	1508	16792	2.72196	0.999994	0.075345	0.0692669
GOTERM_BP_ALL	GO:0010941~regulation of cell death	11	23.913	0.00484447	BTG2, NLRP12, CCL5, MYC, IL1B, DDIT4, OSM, CCL3, S100A8, SLC9A1, CTSB	45	1509	16792	2.72015	0.999995	0.075345	0.0692669
GOTERM_BP_ALL	GO:0051173~positive regulation of nitrogen compound metabolic process	12	26.087	0.00490422	BTG2, CCL5, MYC, IL1B, CHD7, OSM, IRF8, ARHGEF10L, PTX3, CCNL1, SLC9A1, IFNAR1	45	1767	16792	2.53416	0.999995	0.0754785	0.0693896
GOTERM_BP_ALL	GO:0050701~interleukin-1 secretion	3	6.52174	0.00491334	NLRP12, CCL3, IFNAR1	45	40	16792	27.9867	0.999996	0.0754785	0.0693896
GOTERM_BP_ALL	GO:0080090~regulation of primary metabolic process	25	54.3478	0.00501897	SCARB1, BTG2, CHD7, ARHGEF10L, SLC9A1, HLX, MYC, CCL5, CCL3, S100A12, PMEPA1, CCNL1, RBM38, ZHX2, ACSL1, USP3, OSM, NLRP12, IL1B, DDIT4, MYADM, IRF8, TRIB1, S100A8, IFNAR1	45	5798	16792	1.60898	0.999997	0.0766311	0.0704492
GOTERM_BP_ALL	GO:0051128~regulation of cellular component organization	14	30.4348	0.00522853	ROBO2, SCARB1, OSM, ARHGEF10L, TRIOBP, SLC9A1, MYC, IL1B, CCL3, MYADM, IRF8, PMEPA1, PTX3, S100A8	45	2323	16792	2.24889	0.999998	0.0780109	0.0717177
GOTERM_BP_ALL	GO:0060255~regulation of macromolecule metabolic process	25	54.3478	0.00523531	BTG2, CHD7, ARHGEF10L, SLC9A1, HLX, MYC, CCL5, CCL3, S100A12, PMEPA1, CCNL1, RBM38, ZHX2, ACSL1, USP3, OSM, NLRP12, IL1B, DDIT4, MYADM, IRF8, PTX3, TRIB1, S100A8, IFNAR1	45	5815	16792	1.60428	0.999998	0.0780109	0.0717177
GOTERM_BP_ALL	GO:0019222~regulation of metabolic process	26	56.5217	0.00524245	SCARB1, BTG2, CHD7, ARHGEF10L, SLC9A1, HLX, MYC, CCL5, CCL3, S100A12, PMEPA1, CCNL1, RBM38, ZHX2, ACSL1, USP3, OSM, NLRP12, IL1B, DDIT4, MYADM, IRF8, PTX3, TRIB1, S100A8, IFNAR1	45	6171	16792	1.5722	0.999998	0.0780109	0.0717177
GOTERM_BP_ALL	GO:0010605~negative regulation of macromolecule metabolic process	14	30.4348	0.00528695	ZHX2, BTG2, USP3, NLRP12, MYC, IL1B, CCL5, DDIT4, CCL3, MYADM, IRF8, PMEPA1, PTX3, TRIB1	45	2326	16792	2.24599	0.999998	0.0780109	0.0717177
GOTERM_BP_ALL	GO:0071346~cellular response to interferon-gamma	4	8.69565	0.00529082	CCL5, MYC, CCL3, IRF8	45	135	16792	11.0565	0.999998	0.0780109	0.0717177
GOTERM_BP_ALL	GO:0051234~establishment of localization	22	47.8261	0.00529627	SCARB1, ACSL1, TTYH1, CHD7, OSM, LYST, SLC9A1, POLA2, NLRP12, PSTPIP1, MYC, IL1B, CCL5, CCL3, MYADM, IRF8, S100A12, PTX3, RIN3, ATP6V0D1, S100A8, IFNAR1	45	4790	16792	1.71387	0.999998	0.0780109	0.0717177
GOTERM_BP_ALL	GO:0080134~regulation of response to stress	10	21.7391	0.00538395	NLRP12, CCL5, MYC, IL1B, OSM, CCL3, S100A12, S100A8, CTSB, IFNAR1	45	1285	16792	2.90393	0.999999	0.0786192	0.0722769
GOTERM_BP_ALL	GO:1903707~negative regulation of hemopoiesis	4	8.69565	0.00540036	HLX, MYC, CCL3, TRIB1	45	136	16792	10.9752	0.999999	0.0786192	0.0722769
GOTERM_BP_ALL	GO:0051704~multi-organism process	14	30.4348	0.00558714	SCARB1, LYST, MYC, IL1B, CCL5, DDIT4, CCL3, IRF8, S100A12, PTX3, TRIB1, S100A8, CTSB, IFNAR1	45	2341	16792	2.2316	0.999999	0.0808681	0.0743444
GOTERM_BP_ALL	GO:0031324~negative regulation of cellular metabolic process	14	30.4348	0.00566949	ZHX2, BTG2, USP3, NLRP12, MYC, IL1B, CCL5, DDIT4, CCL3, MYADM, IRF8, PMEPA1, PTX3, TRIB1	45	2345	16792	2.22779	0.999999	0.0812505	0.074696
GOTERM_BP_ALL	GO:0045595~regulation of cell differentiation	11	23.913	0.00569635	RBM38, ROBO2, ZHX2, HLX, MYC, IL1B, CHD7, CCL3, MYADM, TRIB1, TRIOBP	45	1544	16792	2.65849	0.999999	0.0812505	0.074696
GOTERM_BP_ALL	GO:1903530~regulation of secretion by cell	7	15.2174	0.0057109	NLRP12, CCL5, IL1B, CHD7, OSM, CCL3, IFNAR1	45	630	16792	4.14617	0.999999	0.0812505	0.074696
GOTERM_BP_ALL	GO:0001816~cytokine production	7	15.2174	0.00575451	NLRP12, IL1B, CCL3, IRF8, S100A12, S100A8, IFNAR1	45	631	16792	4.1396	0.999999	0.0814084	0.0748411
GOTERM_BP_ALL	GO:0000165~MAPK cascade	8	17.3913	0.00584036	NLRP12, CCL5, MYC, IL1B, OSM, CCL3, S100A12, TRIB1	45	841	16792	3.54964	1	0.0821588	0.0755309
GOTERM_BP_ALL	GO:1901652~response to peptide	6	13.0435	0.00587431	PTPRE, BTG2, MYC, IL1B, ATP6V0D1, SLC9A1	45	444	16792	5.04264	1	0.0821747	0.0755456
GOTERM_BP_ALL	GO:0051179~localization	25	54.3478	0.00602055	SCARB1, TTYH1, CHD7, LYST, SLC9A1, PSTPIP1, MYC, CCL5, CCL3, S100A12, MARK1, ACSL1, OSM, NLRP12, POLA2, IL1B, DDIT4, MYADM, IRF8, RIN3, PTX3, ATP6V0D1, TRIB1, S100A8, IFNAR1	45	5872	16792	1.58871	1	0.0837525	0.0769961
GOTERM_BP_ALL	GO:0060284~regulation of cell development	8	17.3913	0.00622315	ROBO2, ZHX2, MYC, IL1B, CHD7, MYADM, TRIB1, TRIOBP	45	851	16792	3.50793	1	0.0860926	0.0791474
GOTERM_BP_ALL	GO:0065007~biological regulation	39	84.7826	0.00626401	ROBO2, SCARB1, BTG2, TTYH1, CPQ, CHD7, ARHGEF10L, TRIOBP, SLC9A1, PSTPIP1, HLX, MYC, CCL5, PSD4, CCL3, S100A12, PMEPA1, CCNL1, LAIR1, CTSB, MARK1, RBM38, ZHX2, ACSL1, USP3, OSM, PTPRE, NLRP12, POLA2, IL1B, DDIT4, MYADM, IRF8, RIN3, PTX3, ATP6V0D1, TRIB1, S100A8, IFNAR1	45	11548	16792	1.26022	1	0.086164	0.0792131
GOTERM_BP_ALL	GO:0055080~cation homeostasis	7	15.2174	0.00629713	CCL5, MYC, CHD7, CCL3, ATP6V0D1, S100A8, SLC9A1	45	643	16792	4.06235	1	0.086164	0.0792131
GOTERM_BP_ALL	GO:0070486~leukocyte aggregation	6	13.0435	0.00644417	HLX, CCL5, IL1B, CHD7, S100A8, IFNAR1	45	454	16792	4.93157	1	0.0876967	0.0806221
GOTERM_BP_ALL	GO:1901362~organic cyclic compound biosynthetic process	21	45.6522	0.00649596	ZHX2, BTG2, USP3, CHD7, OSM, ARHGEF10L, SLC9A1, POLA2, NLRP12, HLX, MYC, IL1B, CCL5, CCL3, IRF8, S100A12, TK2, TRIB1, CCNL1, S100A8, IFNAR1	45	4535	16792	1.72795	1	0.0879237	0.0808308
GOTERM_BP_ALL	GO:0009968~negative regulation of signal transduction	9	19.5652	0.00668362	PTPRE, NLRP12, CCL5, MYC, IL1B, DDIT4, MYADM, PMEPA1, TRIB1	45	1089	16792	3.08393	1	0.0899774	0.0827188
GOTERM_BP_ALL	GO:0032774~RNA biosynthetic process	19	41.3043	0.00683128	ZHX2, BTG2, USP3, CHD7, OSM, ARHGEF10L, SLC9A1, NLRP12, HLX, MYC, IL1B, CCL5, CCL3, IRF8, S100A12, TRIB1, CCNL1, S100A8, IFNAR1	45	3905	16792	1.81561	1	0.0914733	0.0840941
GOTERM_BP_ALL	GO:0051235~maintenance of location	5	10.8696	0.00687461	SCARB1, IL1B, CHD7, CCL3, S100A8	45	290	16792	6.43372	1	0.091564	0.0841774
GOTERM_BP_ALL	GO:0012501~programmed cell death	12	26.087	0.00698696	ROBO2, BTG2, NLRP12, CCL5, MYC, IL1B, DDIT4, OSM, CCL3, S100A8, SLC9A1, CTSB	45	1852	16792	2.41785	1	0.09232	0.0848724
GOTERM_BP_ALL	GO:0098771~inorganic ion homeostasis	7	15.2174	0.00702715	CCL5, MYC, CHD7, CCL3, ATP6V0D1, S100A8, SLC9A1	45	658	16792	3.96974	1	0.09232	0.0848724
GOTERM_BP_ALL	GO:0044267~cellular protein metabolic process	22	47.8261	0.00704795	BTG2, ACSL1, USP3, OSM, TRIOBP, PTPRE, NLRP12, MYC, IL1B, CCL5, DDIT4, CCL3, MYADM, PMEPA1, S100A12, TRIB1, LONRF1, CCNL1, S100A8, CTSB, MARK1, IFNAR1	45	4900	16792	1.67539	1	0.09232	0.0848724
GOTERM_BP_ALL	GO:0050707~regulation of cytokine secretion	4	8.69565	0.00707885	NLRP12, IL1B, CCL3, IFNAR1	45	150	16792	9.95081	1	0.09232	0.0848724
GOTERM_BP_ALL	GO:0010557~positive regulation of macromolecule biosynthetic process	11	23.913	0.00720828	NLRP12, CCL5, MYC, IL1B, CHD7, OSM, IRF8, ARHGEF10L, CCNL1, SLC9A1, IFNAR1	45	1597	16792	2.57026	1	0.0935208	0.0859764
GOTERM_BP_ALL	GO:0071375~cellular response to peptide hormone stimulus	5	10.8696	0.00729456	PTPRE, MYC, IL1B, ATP6V0D1, SLC9A1	45	295	16792	6.32467	1	0.0938287	0.0862594
GOTERM_BP_ALL	GO:0023014~signal transduction by protein phosphorylation	8	17.3913	0.00730694	NLRP12, CCL5, MYC, IL1B, OSM, CCL3, S100A12, TRIB1	45	877	16792	3.40393	1	0.0938287	0.0862594
GOTERM_BP_ALL	GO:0009306~protein secretion	6	13.0435	0.00737064	NLRP12, CCL5, IL1B, CCL3, S100A12, IFNAR1	45	469	16792	4.77385	1	0.0941637	0.0865675
GOTERM_BP_ALL	GO:0042993~positive regulation of transcription factor import into nucleus	3	6.52174	0.00758963	NLRP12, IL1B, SLC9A1	45	50	16792	22.3893	1	0.0954997	0.0877956
GOTERM_BP_ALL	GO:0032651~regulation of interleukin-1 beta production	3	6.52174	0.00758963	NLRP12, CCL3, IFNAR1	45	50	16792	22.3893	1	0.0954997	0.0877956
GOTERM_BP_ALL	GO:0002762~negative regulation of myeloid leukocyte differentiation	3	6.52174	0.00758963	MYC, CCL3, TRIB1	45	50	16792	22.3893	1	0.0954997	0.0877956
GOTERM_BP_ALL	GO:0010817~regulation of hormone levels	6	13.0435	0.00776616	SCARB1, CPQ, CCL5, IL1B, CHD7, OSM	45	475	16792	4.71354	1	0.0972324	0.0893885
GOTERM_BP_ALL	GO:0044271~cellular nitrogen compound biosynthetic process	22	47.8261	0.00793395	ZHX2, BTG2, USP3, CHD7, OSM, ARHGEF10L, SLC9A1, POLA2, NLRP12, HLX, MYC, IL1B, CCL5, CCL3, IRF8, S100A12, TK2, PTX3, TRIB1, CCNL1, S100A8, IFNAR1	45	4947	16792	1.65947	1	0.0988389	0.0908654
GOTERM_BP_ALL	GO:0051701~interaction with host	4	8.69565	0.0081623	SCARB1, MYC, PTX3, CTSB	45	158	16792	9.44698	1	0.100687	0.0925644
GOTERM_BP_ALL	GO:0030154~cell differentiation	18	39.1304	0.00816272	ROBO2, RBM38, ZHX2, BTG2, CHD7, TRIOBP, SLC9A1, HLX, MYC, IL1B, DDIT4, CCL3, MYADM, IRF8, TRIB1, S100A8, CTSB, MARK1	45	3652	16792	1.83921	1	0.100687	0.0925644
GOTERM_BP_ALL	GO:0009620~response to fungus	3	6.52174	0.00849527	S100A12, PTX3, S100A8	45	53	16792	21.122	1	0.103767	0.0953956
GOTERM_BP_ALL	GO:0014910~regulation of smooth muscle cell migration	3	6.52174	0.00849527	CCL5, MYC, TRIB1	45	53	16792	21.122	1	0.103767	0.0953956
GOTERM_BP_ALL	GO:0034341~response to interferon-gamma	4	8.69565	0.00859242	CCL5, MYC, CCL3, IRF8	45	161	16792	9.27095	1	0.104444	0.0960182
GOTERM_BP_ALL	GO:0048869~cellular developmental process	19	41.3043	0.0086751	ROBO2, RBM38, ZHX2, BTG2, CHD7, TRIOBP, SLC9A1, HLX, MYC, IL1B, DDIT4, CCL3, MYADM, IRF8, TRIB1, ATP6V0D1, S100A8, CTSB, MARK1	45	3992	16792	1.77604	1	0.104939	0.0964738
GOTERM_BP_ALL	GO:0007159~leukocyte cell-cell adhesion	6	13.0435	0.00889325	HLX, CCL5, IL1B, CHD7, S100A8, IFNAR1	45	491	16792	4.55995	1	0.106549	0.0979535
GOTERM_BP_ALL	GO:0006875~cellular metal ion homeostasis	6	13.0435	0.00889325	CCL5, MYC, CHD7, CCL3, S100A8, SLC9A1	45	491	16792	4.55995	1	0.106549	0.0979535
GOTERM_BP_ALL	GO:0098542~defense response to other organism	6	13.0435	0.0091166	DDIT4, IRF8, S100A12, LYST, S100A8, IFNAR1	45	494	16792	4.53225	1	0.108002	0.0992894
GOTERM_BP_ALL	GO:1902533~positive regulation of intracellular signal transduction	8	17.3913	0.00913772	NLRP12, CCL5, IL1B, OSM, CCL3, S100A12, S100A8, SLC9A1	45	915	16792	3.26256	1	0.108002	0.0992894
GOTERM_BP_ALL	GO:1901653~cellular response to peptide	5	10.8696	0.00914394	PTPRE, MYC, IL1B, ATP6V0D1, SLC9A1	45	315	16792	5.9231	1	0.108002	0.0992894
GOTERM_BP_ALL	GO:0051345~positive regulation of hydrolase activity	8	17.3913	0.00924269	NLRP12, CCL5, MYC, PSD4, CCL3, RIN3, ARHGEF10L, S100A8	45	917	16792	3.25545	1	0.108656	0.0998905
GOTERM_BP_ALL	GO:0042981~regulation of apoptotic process	10	21.7391	0.00932327	BTG2, NLRP12, CCL5, MYC, IL1B, OSM, CCL3, S100A8, SLC9A1, CTSB	45	1400	16792	2.6654	1	0.108742	0.09997
GOTERM_BP_ALL	GO:0050801~ion homeostasis	7	15.2174	0.0093369	CCL5, MYC, CHD7, CCL3, ATP6V0D1, S100A8, SLC9A1	45	699	16792	3.73689	1	0.108742	0.09997
GOTERM_BP_ALL	GO:0051050~positive regulation of transport	8	17.3913	0.00940181	NLRP12, CCL5, IL1B, CCL3, PTX3, S100A8, SLC9A1, IFNAR1	45	920	16792	3.24483	1	0.108991	0.100199
GOTERM_BP_ALL	GO:0051851~modification by host of symbiont morphology or physiology	3	6.52174	0.00944698	CCL5, CCL3, PTX3	45	56	16792	19.9905	1	0.10901	0.100216
GOTERM_BP_ALL	GO:0014909~smooth muscle cell migration	3	6.52174	0.00977432	CCL5, MYC, TRIB1	45	57	16792	19.6398	1	0.11227	0.103213
GOTERM_BP_ALL	GO:0098609~cell-cell adhesion	9	19.5652	0.00984836	ROBO2, TTYH1, HLX, CCL5, IL1B, CHD7, MYADM, S100A8, IFNAR1	45	1164	16792	2.88522	1	0.112452	0.10338
GOTERM_BP_ALL	GO:0043067~regulation of programmed cell death	10	21.7391	0.00987997	BTG2, NLRP12, CCL5, MYC, IL1B, OSM, CCL3, S100A8, SLC9A1, CTSB	45	1413	16792	2.64087	1	0.112452	0.10338
GOTERM_BP_ALL	GO:0051254~positive regulation of RNA metabolic process	10	21.7391	0.00996783	BTG2, MYC, IL1B, CHD7, OSM, IRF8, ARHGEF10L, CCNL1, SLC9A1, IFNAR1	45	1415	16792	2.63714	1	0.112939	0.103828
GOTERM_BP_ALL	GO:0042327~positive regulation of phosphorylation	8	17.3913	0.0100587	ACSL1, CCL5, MYC, IL1B, OSM, CCL3, S100A12, CCNL1	45	932	16792	3.20305	1	0.113454	0.104302
GOTERM_BP_ALL	GO:0051702~interaction with symbiont	3	6.52174	0.0101067	CCL5, CCL3, PTX3	45	58	16792	19.3011	1	0.113485	0.10433
GOTERM_BP_ALL	GO:0055082~cellular chemical homeostasis	7	15.2174	0.0102382	CCL5, MYC, CHD7, CCL3, ATP6V0D1, S100A8, SLC9A1	45	713	16792	3.66352	1	0.114449	0.105216
GOTERM_BP_ALL	GO:0009894~regulation of catabolic process	6	13.0435	0.0102921	SCARB1, BTG2, MYC, IL1B, DDIT4, TRIB1	45	509	16792	4.39869	1	0.11454	0.1053
GOTERM_BP_ALL	GO:0009892~negative regulation of metabolic process	14	30.4348	0.0104346	ZHX2, BTG2, USP3, NLRP12, MYC, IL1B, CCL5, DDIT4, CCL3, MYADM, IRF8, PMEPA1, PTX3, TRIB1	45	2522	16792	2.07144	1	0.115612	0.106285
GOTERM_BP_ALL	GO:0008219~cell death	12	26.087	0.0105106	ROBO2, BTG2, NLRP12, CCL5, MYC, IL1B, DDIT4, OSM, CCL3, S100A8, SLC9A1, CTSB	45	1958	16792	2.28696	1	0.115941	0.106588
GOTERM_BP_ALL	GO:0010628~positive regulation of gene expression	11	23.913	0.0106926	CCL5, MYC, IL1B, CHD7, OSM, CCL3, IRF8, ARHGEF10L, CCNL1, SLC9A1, IFNAR1	45	1692	16792	2.42595	1	0.117431	0.107958
GOTERM_BP_ALL	GO:0002548~monocyte chemotaxis	3	6.52174	0.0111335	CCL5, CCL3, S100A12	45	61	16792	18.3519	1	0.12174	0.111919
GOTERM_BP_ALL	GO:1901360~organic cyclic compound metabolic process	25	54.3478	0.0114412	SCARB1, BTG2, CPQ, CHD7, ARHGEF10L, SLC9A1, HLX, MYC, CCL5, CCL3, S100A12, TK2, CCNL1, RBM38, ZHX2, USP3, OSM, NLRP12, POLA2, IL1B, DDIT4, IRF8, TRIB1, S100A8, IFNAR1	45	6149	16792	1.51714	1	0.12456	0.114511
GOTERM_BP_ALL	GO:0010556~regulation of macromolecule biosynthetic process	19	41.3043	0.0117288	ZHX2, BTG2, USP3, CHD7, OSM, ARHGEF10L, SLC9A1, NLRP12, HLX, MYC, IL1B, CCL5, CCL3, IRF8, S100A12, TRIB1, CCNL1, S100A8, IFNAR1	45	4107	16792	1.72631	1	0.126187	0.116008
GOTERM_BP_ALL	GO:0045787~positive regulation of cell cycle	5	10.8696	0.0117392	RBM38, BTG2, MYC, IL1B, CCNL1	45	339	16792	5.50377	1	0.126187	0.116008
GOTERM_BP_ALL	GO:0050789~regulation of biological process	37	80.4348	0.0117612	ROBO2, SCARB1, BTG2, TTYH1, CHD7, ARHGEF10L, TRIOBP, SLC9A1, PSTPIP1, HLX, MYC, CCL5, PSD4, CCL3, S100A12, PMEPA1, CCNL1, LAIR1, CTSB, MARK1, RBM38, ZHX2, ACSL1, USP3, OSM, PTPRE, NLRP12, IL1B, DDIT4, MYADM, IRF8, RIN3, PTX3, ATP6V0D1, TRIB1, S100A8, IFNAR1	45	10922	16792	1.26412	1	0.126187	0.116008
GOTERM_BP_ALL	GO:0019538~protein metabolic process	23	50	0.0118202	BTG2, ACSL1, CPQ, USP3, OSM, TRIOBP, PTPRE, NLRP12, MYC, IL1B, CCL5, DDIT4, CCL3, MYADM, PMEPA1, S100A12, TRIB1, LONRF1, CCNL1, S100A8, CTSB, MARK1, IFNAR1	45	5457	16792	1.57276	1	0.126187	0.116008
GOTERM_BP_ALL	GO:0032652~regulation of interleukin-1 production	3	6.52174	0.0118426	NLRP12, CCL3, IFNAR1	45	63	16792	17.7693	1	0.126187	0.116008
GOTERM_BP_ALL	GO:0032940~secretion by cell	8	17.3913	0.0121038	NLRP12, CCL5, IL1B, CHD7, OSM, CCL3, S100A12, IFNAR1	45	966	16792	3.09032	1	0.128424	0.118064
GOTERM_BP_ALL	GO:0002252~immune effector process	7	15.2174	0.0123015	HLX, IL1B, DDIT4, CCL3, PTX3, LYST, IFNAR1	45	742	16792	3.52034	1	0.12997	0.119485
GOTERM_BP_ALL	GO:0032729~positive regulation of interferon-gamma production	3	6.52174	0.0125712	IL1B, IRF8, IFNAR1	45	65	16792	17.2226	1	0.132261	0.121592
GOTERM_BP_ALL	GO:0045321~leukocyte activation	7	15.2174	0.012685	HLX, CCL5, IL1B, CHD7, CCL3, S100A12, IFNAR1	45	747	16792	3.49677	1	0.1329	0.122179
GOTERM_BP_ALL	GO:0009056~catabolic process	12	26.087	0.0127747	SCARB1, ZHX2, BTG2, ACSL1, CPQ, MYC, IL1B, USP3, DDIT4, TRIB1, SLC9A1, CTSB	45	2012	16792	2.22558	1	0.133282	0.12253
GOTERM_BP_ALL	GO:0090304~nucleic acid metabolic process	22	47.8261	0.0131551	RBM38, ZHX2, BTG2, USP3, CHD7, OSM, ARHGEF10L, SLC9A1, POLA2, NLRP12, HLX, MYC, IL1B, CCL5, CCL3, IRF8, S100A12, TK2, TRIB1, CCNL1, S100A8, IFNAR1	45	5158	16792	1.59159	1	0.136682	0.125656
GOTERM_BP_ALL	GO:0006915~apoptotic process	11	23.913	0.0132355	ROBO2, BTG2, NLRP12, CCL5, MYC, IL1B, DDIT4, OSM, CCL3, S100A8, SLC9A1	45	1747	16792	2.34958	1	0.136682	0.125656
GOTERM_BP_ALL	GO:0050764~regulation of phagocytosis	3	6.52174	0.0133188	SCARB1, IL1B, PTX3	45	67	16792	16.7085	1	0.136682	0.125656
GOTERM_BP_ALL	GO:0014812~muscle cell migration	3	6.52174	0.0133188	CCL5, MYC, TRIB1	45	67	16792	16.7085	1	0.136682	0.125656
GOTERM_BP_ALL	GO:0009888~tissue development	11	23.913	0.0136923	ROBO2, BTG2, CPQ, HLX, MYC, IL1B, CHD7, CCL3, MYADM, SLC9A1, CTSB	45	1756	16792	2.33753	1	0.139546	0.128289
GOTERM_BP_ALL	GO:0051047~positive regulation of secretion	5	10.8696	0.0137094	NLRP12, IL1B, CCL3, S100A8, IFNAR1	45	355	16792	5.25571	1	0.139546	0.128289
GOTERM_BP_ALL	GO:0032269~negative regulation of cellular protein metabolic process	8	17.3913	0.0138617	BTG2, NLRP12, MYC, IL1B, DDIT4, MYADM, PMEPA1, TRIB1	45	992	16792	3.00932	1	0.140525	0.129189
GOTERM_BP_ALL	GO:0045862~positive regulation of proteolysis	5	10.8696	0.0141009	NLRP12, MYC, IL1B, TRIB1, S100A8	45	358	16792	5.21167	1	0.142374	0.130889
GOTERM_BP_ALL	GO:0040012~regulation of locomotion	7	15.2174	0.0143889	ROBO2, SCARB1, CCL5, MYC, CCL3, MYADM, TRIB1	45	768	16792	3.40116	1	0.144628	0.132961
GOTERM_BP_ALL	GO:0043269~regulation of ion transport	6	13.0435	0.0144397	TTYH1, CCL5, IL1B, CHD7, CCL3, SLC9A1	45	554	16792	4.0414	1	0.144628	0.132961
GOTERM_BP_ALL	GO:0055065~metal ion homeostasis	6	13.0435	0.0148558	CCL5, MYC, CHD7, CCL3, S100A8, SLC9A1	45	558	16792	4.01243	1	0.148203	0.136247
GOTERM_BP_ALL	GO:0051241~negative regulation of multicellular organismal process	8	17.3913	0.0157203	ROBO2, ZHX2, NLRP12, HLX, MYC, IL1B, CCL3, TRIB1	45	1017	16792	2.93534	1	0.156205	0.143604
GOTERM_BP_ALL	GO:0051239~regulation of multicellular organismal process	14	30.4348	0.0159744	ROBO2, SCARB1, ZHX2, CHD7, SLC9A1, NLRP12, HLX, MYC, IL1B, CCL3, MYADM, IRF8, TRIB1, IFNAR1	45	2659	16792	1.96472	1	0.158103	0.145348
GOTERM_BP_ALL	GO:0051090~regulation of sequence-specific DNA binding transcription factor activity	5	10.8696	0.0161656	NLRP12, IL1B, S100A12, TRIB1, S100A8	45	373	16792	5.00209	1	0.159365	0.146509
GOTERM_BP_ALL	GO:0051924~regulation of calcium ion transport	4	8.69565	0.0162373	CCL5, CHD7, CCL3, SLC9A1	45	204	16792	7.31678	1	0.159444	0.146582
GOTERM_BP_ALL	GO:0006725~cellular aromatic compound metabolic process	24	52.1739	0.0166519	RBM38, ZHX2, BTG2, CPQ, USP3, CHD7, OSM, ARHGEF10L, SLC9A1, POLA2, NLRP12, HLX, MYC, IL1B, CCL5, DDIT4, CCL3, IRF8, S100A12, TK2, TRIB1, CCNL1, S100A8, IFNAR1	45	5965	16792	1.50138	1	0.162533	0.149421
GOTERM_BP_ALL	GO:0043900~regulation of multi-organism process	5	10.8696	0.0167468	CCL5, CCL3, IRF8, PTX3, TRIB1	45	377	16792	4.94901	1	0.162533	0.149421
GOTERM_BP_ALL	GO:0006355~regulation of transcription, DNA-templated	17	36.9565	0.0167674	ZHX2, BTG2, USP3, CHD7, OSM, ARHGEF10L, SLC9A1, NLRP12, HLX, MYC, IL1B, IRF8, S100A12, TRIB1, CCNL1, S100A8, IFNAR1	45	3603	16792	1.76066	1	0.162533	0.149421
GOTERM_BP_ALL	GO:0006351~transcription, DNA-templated	17	36.9565	0.0168535	ZHX2, BTG2, USP3, CHD7, OSM, ARHGEF10L, SLC9A1, NLRP12, HLX, MYC, IL1B, IRF8, S100A12, TRIB1, CCNL1, S100A8, IFNAR1	45	3605	16792	1.75968	1	0.162533	0.149421
GOTERM_BP_ALL	GO:0002791~regulation of peptide secretion	4	8.69565	0.0168764	CCL5, IL1B, CHD7, S100A8	45	207	16792	7.21074	1	0.162533	0.149421
GOTERM_BP_ALL	GO:0006366~transcription from RNA polymerase II promoter	11	23.913	0.0172976	ZHX2, BTG2, MYC, IL1B, USP3, CHD7, OSM, IRF8, ARHGEF10L, CCNL1, SLC9A1	45	1820	16792	2.25534	1	0.165438	0.152092
GOTERM_BP_ALL	GO:0090087~regulation of peptide transport	4	8.69565	0.0173102	CCL5, IL1B, CHD7, S100A8	45	209	16792	7.14173	1	0.165438	0.152092
GOTERM_BP_ALL	GO:0045944~positive regulation of transcription from RNA polymerase II promoter	8	17.3913	0.0176676	MYC, IL1B, CHD7, OSM, IRF8, ARHGEF10L, CCNL1, SLC9A1	45	1041	16792	2.86767	1	0.167727	0.154196
GOTERM_BP_ALL	GO:1903506~regulation of nucleic acid-templated transcription	17	36.9565	0.0177346	ZHX2, BTG2, USP3, CHD7, OSM, ARHGEF10L, SLC9A1, NLRP12, HLX, MYC, IL1B, IRF8, S100A12, TRIB1, CCNL1, S100A8, IFNAR1	45	3625	16792	1.74997	1	0.167727	0.154196
GOTERM_BP_ALL	GO:0045785~positive regulation of cell adhesion	5	10.8696	0.0179483	HLX, CCL5, IL1B, MYADM, TRIOBP	45	385	16792	4.84618	1	0.167727	0.154196
GOTERM_BP_ALL	GO:0044087~regulation of cellular component biogenesis	7	15.2174	0.0179706	ROBO2, MYADM, IRF8, PMEPA1, ARHGEF10L, TRIOBP, SLC9A1	45	807	16792	3.23679	1	0.167727	0.154196
GOTERM_BP_ALL	GO:0001819~positive regulation of cytokine production	5	10.8696	0.0181022	NLRP12, IL1B, CCL3, IRF8, IFNAR1	45	386	16792	4.83362	1	0.167727	0.154196
GOTERM_BP_ALL	GO:0043270~positive regulation of ion transport	4	8.69565	0.0181966	CCL5, IL1B, CCL3, SLC9A1	45	213	16792	7.00762	1	0.167727	0.154196
GOTERM_BP_ALL	GO:2000503~positive regulation of natural killer cell chemotaxis	2	4.34783	0.0182017	CCL5, CCL3	45	7	16792	106.616	1	0.167727	0.154196
GOTERM_BP_ALL	GO:0006357~regulation of transcription from RNA polymerase II promoter	11	23.913	0.0182377	ZHX2, BTG2, MYC, IL1B, USP3, CHD7, OSM, IRF8, ARHGEF10L, CCNL1, SLC9A1	45	1835	16792	2.2369	1	0.167727	0.154196
GOTERM_BP_ALL	GO:0051248~negative regulation of protein metabolic process	8	17.3913	0.0183535	BTG2, NLRP12, MYC, IL1B, DDIT4, MYADM, PMEPA1, TRIB1	45	1049	16792	2.8458	1	0.167727	0.154196
GOTERM_BP_ALL	GO:0048878~chemical homeostasis	8	17.3913	0.0183535	SCARB1, CCL5, MYC, CHD7, CCL3, ATP6V0D1, S100A8, SLC9A1	45	1049	16792	2.8458	1	0.167727	0.154196
GOTERM_BP_ALL	GO:0045937~positive regulation of phosphate metabolic process	8	17.3913	0.0183535	ACSL1, CCL5, MYC, IL1B, OSM, CCL3, S100A12, CCNL1	45	1049	16792	2.8458	1	0.167727	0.154196
GOTERM_BP_ALL	GO:0010562~positive regulation of phosphorus metabolic process	8	17.3913	0.0183535	ACSL1, CCL5, MYC, IL1B, OSM, CCL3, S100A12, CCNL1	45	1049	16792	2.8458	1	0.167727	0.154196
GOTERM_BP_ALL	GO:0050714~positive regulation of protein secretion	4	8.69565	0.0184221	NLRP12, IL1B, CCL3, IFNAR1	45	214	16792	6.97487	1	0.167742	0.15421
GOTERM_BP_ALL	GO:0050708~regulation of protein secretion	5	10.8696	0.019043	NLRP12, CCL5, IL1B, CCL3, IFNAR1	45	392	16792	4.75964	1	0.172766	0.158829
GOTERM_BP_ALL	GO:0016070~RNA metabolic process	20	43.4783	0.0193973	RBM38, ZHX2, BTG2, USP3, CHD7, OSM, ARHGEF10L, SLC9A1, NLRP12, HLX, MYC, IL1B, CCL5, CCL3, IRF8, S100A12, TRIB1, CCNL1, S100A8, IFNAR1	45	4648	16792	1.60566	1	0.175346	0.161201
GOTERM_BP_ALL	GO:0030335~positive regulation of cell migration	5	10.8696	0.0195246	SCARB1, CCL5, MYC, CCL3, MYADM	45	395	16792	4.72349	1	0.175862	0.161675
GOTERM_BP_ALL	GO:2000112~regulation of cellular macromolecule biosynthetic process	18	39.1304	0.0197121	ZHX2, BTG2, USP3, CHD7, OSM, ARHGEF10L, SLC9A1, NLRP12, HLX, MYC, IL1B, CCL5, IRF8, S100A12, TRIB1, CCNL1, S100A8, IFNAR1	45	3991	16792	1.68299	1	0.176914	0.162642
GOTERM_BP_ALL	GO:0015031~protein transport	11	23.913	0.0198893	POLA2, NLRP12, CCL5, IL1B, CCL3, MYADM, S100A12, ATP6V0D1, LYST, SLC9A1, IFNAR1	45	1860	16792	2.20683	1	0.177867	0.163519
GOTERM_BP_ALL	GO:0019725~cellular homeostasis	7	15.2174	0.0206768	CCL5, MYC, CHD7, CCL3, ATP6V0D1, S100A8, SLC9A1	45	833	16792	3.13576	1	0.184252	0.169388
GOTERM_BP_ALL	GO:0051336~regulation of hydrolase activity	9	19.5652	0.0213215	NLRP12, CCL5, MYC, PSD4, CCL3, RIN3, ARHGEF10L, PTX3, S100A8	45	1337	16792	2.51189	1	0.189323	0.17405
GOTERM_BP_ALL	GO:0007399~nervous system development	12	26.087	0.0216074	ROBO2, ZHX2, BTG2, HLX, MYC, CHD7, DDIT4, OSM, CCL3, ATP6V0D1, S100A8, MARK1	45	2170	16792	2.06353	1	0.191183	0.17576
GOTERM_BP_ALL	GO:2000147~positive regulation of cell motility	5	10.8696	0.0218725	SCARB1, CCL5, MYC, CCL3, MYADM	45	409	16792	4.5618	1	0.192789	0.177237
GOTERM_BP_ALL	GO:1901575~organic substance catabolic process	11	23.913	0.0219429	SCARB1, ZHX2, BTG2, CPQ, MYC, IL1B, USP3, DDIT4, TRIB1, SLC9A1, CTSB	45	1889	16792	2.17295	1	0.192789	0.177237
GOTERM_BP_ALL	GO:0051094~positive regulation of developmental process	8	17.3913	0.0220701	ROBO2, HLX, MYC, IL1B, CHD7, MYADM, TRIB1, TRIOBP	45	1089	16792	2.74127	1	0.193229	0.177641
GOTERM_BP_ALL	GO:0071347~cellular response to interleukin-1	3	6.52174	0.0222751	CCL5, MYC, CCL3	45	88	16792	12.7212	1	0.193485	0.177876
GOTERM_BP_ALL	GO:0045893~positive regulation of transcription, DNA-templated	9	19.5652	0.0223725	MYC, IL1B, CHD7, OSM, IRF8, ARHGEF10L, CCNL1, SLC9A1, IFNAR1	45	1349	16792	2.48955	1	0.193485	0.177876
GOTERM_BP_ALL	GO:1903508~positive regulation of nucleic acid-templated transcription	9	19.5652	0.0223725	MYC, IL1B, CHD7, OSM, IRF8, ARHGEF10L, CCNL1, SLC9A1, IFNAR1	45	1349	16792	2.48955	1	0.193485	0.177876
GOTERM_BP_ALL	GO:0016043~cellular component organization	24	52.1739	0.0224084	ROBO2, SCARB1, BTG2, TTYH1, USP3, CHD7, OSM, ARHGEF10L, LYST, TRIOBP, SLC9A1, POLA2, MYC, IL1B, CCL5, DDIT4, CCL3, MYADM, IRF8, PMEPA1, PTX3, ATP6V0D1, S100A8, MARK1	45	6109	16792	1.46599	1	0.193485	0.177876
GOTERM_BP_ALL	GO:1903901~negative regulation of viral life cycle	3	6.52174	0.0227497	CCL5, CCL3, PTX3	45	89	16792	12.5783	1	0.195658	0.179874
GOTERM_BP_ALL	GO:0044249~cellular biosynthetic process	24	52.1739	0.0228163	SCARB1, ZHX2, BTG2, ACSL1, USP3, CHD7, OSM, ARHGEF10L, SLC9A1, POLA2, NLRP12, HLX, MYC, IL1B, CCL5, CCL3, IRF8, S100A12, TK2, PTX3, TRIB1, CCNL1, S100A8, IFNAR1	45	6118	16792	1.46383	1	0.195658	0.179874
GOTERM_BP_ALL	GO:0051272~positive regulation of cellular component movement	5	10.8696	0.0238346	SCARB1, CCL5, MYC, CCL3, MYADM	45	420	16792	4.44233	1	0.203397	0.186989
GOTERM_BP_ALL	GO:0034641~cellular nitrogen compound metabolic process	25	54.3478	0.0239824	BTG2, CPQ, CHD7, ARHGEF10L, SLC9A1, HLX, MYC, CCL5, CCL3, S100A12, TK2, CCNL1, RBM38, ZHX2, USP3, OSM, NLRP12, POLA2, IL1B, DDIT4, IRF8, PTX3, TRIB1, S100A8, IFNAR1	45	6505	16792	1.43411	1	0.203397	0.186989
GOTERM_BP_ALL	GO:0042990~regulation of transcription factor import into nucleus	3	6.52174	0.0241986	NLRP12, IL1B, SLC9A1	45	92	16792	12.1681	1	0.203397	0.186989
GOTERM_BP_ALL	GO:0051493~regulation of cytoskeleton organization	5	10.8696	0.0242025	MYADM, ARHGEF10L, TRIOBP, S100A8, SLC9A1	45	422	16792	4.42127	1	0.203397	0.186989
GOTERM_BP_ALL	GO:0040017~positive regulation of locomotion	5	10.8696	0.0242025	SCARB1, CCL5, MYC, CCL3, MYADM	45	422	16792	4.42127	1	0.203397	0.186989
GOTERM_BP_ALL	GO:1902680~positive regulation of RNA biosynthetic process	9	19.5652	0.0242062	MYC, IL1B, CHD7, OSM, IRF8, ARHGEF10L, CCNL1, SLC9A1, IFNAR1	45	1369	16792	2.45318	1	0.203397	0.186989
GOTERM_BP_ALL	GO:0006139~nucleobase-containing compound metabolic process	23	50	0.0243763	RBM38, ZHX2, BTG2, USP3, CHD7, OSM, ARHGEF10L, SLC9A1, POLA2, NLRP12, HLX, MYC, IL1B, CCL5, DDIT4, CCL3, IRF8, S100A12, TK2, TRIB1, CCNL1, S100A8, IFNAR1	45	5794	16792	1.48129	1	0.204141	0.187673
GOTERM_BP_ALL	GO:0042991~transcription factor import into nucleus	3	6.52174	0.0246898	NLRP12, IL1B, SLC9A1	45	93	16792	12.0373	1	0.204941	0.188409
GOTERM_BP_ALL	GO:0045638~negative regulation of myeloid cell differentiation	3	6.52174	0.0246898	MYC, CCL3, TRIB1	45	93	16792	12.0373	1	0.204941	0.188409
GOTERM_BP_ALL	GO:0042592~homeostatic process	10	21.7391	0.0247174	SCARB1, POLA2, CCL5, MYC, IL1B, CHD7, CCL3, ATP6V0D1, S100A8, SLC9A1	45	1645	16792	2.26842	1	0.204941	0.188409
GOTERM_BP_ALL	GO:0002682~regulation of immune system process	9	19.5652	0.0250655	HLX, CCL5, MYC, IL1B, CCL3, TRIB1, LAIR1, CTSB, IFNAR1	45	1378	16792	2.43716	1	0.207142	0.190432
GOTERM_BP_ALL	GO:0051347~positive regulation of transferase activity	6	13.0435	0.0252478	ACSL1, CCL5, MYC, IL1B, S100A12, CCNL1	45	640	16792	3.49833	1	0.207951	0.191175
GOTERM_BP_ALL	GO:0097659~nucleic acid-templated transcription	17	36.9565	0.0253294	ZHX2, BTG2, USP3, CHD7, OSM, ARHGEF10L, SLC9A1, NLRP12, HLX, MYC, IL1B, IRF8, S100A12, TRIB1, CCNL1, S100A8, IFNAR1	45	3771	16792	1.68222	1	0.207951	0.191175
GOTERM_BP_ALL	GO:0030155~regulation of cell adhesion	6	13.0435	0.0256986	HLX, CCL5, IL1B, MYADM, TRIOBP, SLC9A1	45	643	16792	3.48201	1	0.209926	0.192991
GOTERM_BP_ALL	GO:0045935~positive regulation of nucleobase-containing compound metabolic process	10	21.7391	0.0258674	BTG2, MYC, IL1B, CHD7, OSM, IRF8, ARHGEF10L, CCNL1, SLC9A1, IFNAR1	45	1658	16792	2.25064	1	0.209926	0.192991
GOTERM_BP_ALL	GO:2000501~regulation of natural killer cell chemotaxis	2	4.34783	0.025903	CCL5, CCL3	45	10	16792	74.6311	1	0.209926	0.192991
GOTERM_BP_ALL	GO:1902105~regulation of leukocyte differentiation	4	8.69565	0.0259171	HLX, MYC, CCL3, TRIB1	45	244	16792	6.1173	1	0.209926	0.192991
GOTERM_BP_ALL	GO:0048856~anatomical structure development	22	47.8261	0.0259892	ROBO2, RBM38, ZHX2, BTG2, IGSF3, CPQ, CHD7, OSM, TRIOBP, SLC9A1, HLX, MYC, IL1B, DDIT4, CCL3, MYADM, IRF8, TRIB1, ATP6V0D1, S100A8, CTSB, MARK1	45	5473	16792	1.49999	1	0.209926	0.192991
GOTERM_BP_ALL	GO:0044767~single-organism developmental process	22	47.8261	0.0260948	ROBO2, RBM38, ZHX2, BTG2, IGSF3, CPQ, CHD7, OSM, TRIOBP, SLC9A1, HLX, MYC, IL1B, DDIT4, CCL3, MYADM, IRF8, TRIB1, ATP6V0D1, S100A8, CTSB, MARK1	45	5475	16792	1.49944	1	0.210101	0.193152
GOTERM_BP_ALL	GO:0045927~positive regulation of growth	4	8.69565	0.0264671	HLX, CHD7, S100A8, SLC9A1	45	246	16792	6.06757	1	0.212415	0.195279
GOTERM_BP_ALL	GO:0032649~regulation of interferon-gamma production	3	6.52174	0.0266954	IL1B, IRF8, IFNAR1	45	97	16792	11.5409	1	0.212883	0.195709
GOTERM_BP_ALL	GO:0042307~positive regulation of protein import into nucleus	3	6.52174	0.0266954	NLRP12, IL1B, SLC9A1	45	97	16792	11.5409	1	0.212883	0.195709
GOTERM_BP_ALL	GO:0008285~negative regulation of cell proliferation	6	13.0435	0.0269264	RBM38, BTG2, MYC, IL1B, OSM, TRIB1	45	651	16792	3.43922	1	0.214044	0.196777
GOTERM_BP_ALL	GO:0040008~regulation of growth	6	13.0435	0.0270825	HLX, CHD7, OSM, IRF8, S100A8, SLC9A1	45	652	16792	3.43395	1	0.214449	0.19715
GOTERM_BP_ALL	GO:0007049~cell cycle	10	21.7391	0.0271487	RBM38, POLA2, BTG2, TTYH1, MYC, IL1B, USP3, OSM, CCNL1, TRIOBP	45	1672	16792	2.23179	1	0.214449	0.19715
GOTERM_BP_ALL	GO:0050794~regulation of cellular process	35	76.087	0.0273475	ROBO2, SCARB1, BTG2, CHD7, ARHGEF10L, TRIOBP, SLC9A1, PSTPIP1, HLX, MYC, CCL5, PSD4, CCL3, S100A12, PMEPA1, CCNL1, CTSB, MARK1, RBM38, ZHX2, ACSL1, USP3, OSM, PTPRE, NLRP12, IL1B, DDIT4, MYADM, IRF8, RIN3, PTX3, ATP6V0D1, TRIB1, S100A8, IFNAR1	45	10489	16792	1.24516	1	0.21534	0.197969
GOTERM_BP_ALL	GO:0001934~positive regulation of protein phosphorylation	7	15.2174	0.0275637	ACSL1, CCL5, IL1B, OSM, CCL3, S100A12, CCNL1	45	890	16792	2.93493	1	0.215579	0.198188
GOTERM_BP_ALL	GO:0002790~peptide secretion	4	8.69565	0.0275859	CCL5, IL1B, CHD7, S100A8	45	250	16792	5.97049	1	0.215579	0.198188
GOTERM_BP_ALL	GO:0006807~nitrogen compound metabolic process	26	56.5217	0.0277133	SCARB1, BTG2, CPQ, CHD7, ARHGEF10L, SLC9A1, HLX, MYC, CCL5, CCL3, S100A12, TK2, CCNL1, RBM38, ZHX2, USP3, OSM, NLRP12, POLA2, IL1B, DDIT4, IRF8, PTX3, TRIB1, S100A8, IFNAR1	45	6948	16792	1.39638	1	0.215579	0.198188
GOTERM_BP_ALL	GO:1904591~positive regulation of protein import	3	6.52174	0.0277222	NLRP12, IL1B, SLC9A1	45	99	16792	11.3077	1	0.215579	0.198188
GOTERM_BP_ALL	GO:0048245~eosinophil chemotaxis	2	4.34783	0.0284569	CCL5, CCL3	45	11	16792	67.8465	1	0.220607	0.202811
GOTERM_BP_ALL	GO:0046883~regulation of hormone secretion	4	8.69565	0.0287298	CCL5, IL1B, CHD7, OSM	45	254	16792	5.87647	1	0.221027	0.203197
GOTERM_BP_ALL	GO:0009059~macromolecule biosynthetic process	21	45.6522	0.0288106	ZHX2, BTG2, USP3, CHD7, OSM, ARHGEF10L, SLC9A1, POLA2, NLRP12, HLX, MYC, IL1B, CCL5, CCL3, IRF8, S100A12, TK2, TRIB1, CCNL1, S100A8, IFNAR1	45	5175	16792	1.51425	1	0.221027	0.203197
GOTERM_BP_ALL	GO:0070489~T cell aggregation	5	10.8696	0.02889	HLX, CCL5, IL1B, CHD7, IFNAR1	45	446	16792	4.18336	1	0.221027	0.203197
GOTERM_BP_ALL	GO:0042110~T cell activation	5	10.8696	0.02889	HLX, CCL5, IL1B, CHD7, IFNAR1	45	446	16792	4.18336	1	0.221027	0.203197
GOTERM_BP_ALL	GO:0033043~regulation of organelle organization	8	17.3913	0.0289524	MYC, IL1B, OSM, MYADM, ARHGEF10L, TRIOBP, S100A8, SLC9A1	45	1152	16792	2.59136	1	0.221027	0.203197
GOTERM_BP_ALL	GO:0071593~lymphocyte aggregation	5	10.8696	0.0290963	HLX, CCL5, IL1B, CHD7, IFNAR1	45	447	16792	4.174	1	0.221301	0.203449
GOTERM_BP_ALL	GO:0006897~endocytosis	6	13.0435	0.0291651	SCARB1, PSTPIP1, IL1B, IRF8, RIN3, PTX3	45	665	16792	3.36682	1	0.221301	0.203449
GOTERM_BP_ALL	GO:0007417~central nervous system development	7	15.2174	0.0294651	ROBO2, BTG2, MYC, CHD7, DDIT4, ATP6V0D1, S100A8	45	904	16792	2.88948	1	0.222902	0.20492
GOTERM_BP_ALL	GO:1901214~regulation of neuron death	4	8.69565	0.0296042	BTG2, CCL5, DDIT4, CCL3	45	257	16792	5.80787	1	0.22328	0.205268
GOTERM_BP_ALL	GO:0042089~cytokine biosynthetic process	3	6.52174	0.0298231	NLRP12, IL1B, IFNAR1	45	103	16792	10.8686	1	0.223584	0.205548
GOTERM_BP_ALL	GO:0032609~interferon-gamma production	3	6.52174	0.0298231	IL1B, IRF8, IFNAR1	45	103	16792	10.8686	1	0.223584	0.205548
GOTERM_BP_ALL	GO:0001775~cell activation	7	15.2174	0.0303062	HLX, CCL5, IL1B, CHD7, CCL3, S100A12, IFNAR1	45	910	16792	2.87043	1	0.226411	0.208146
GOTERM_BP_ALL	GO:0071840~cellular component organization or biogenesis	24	52.1739	0.030381	ROBO2, SCARB1, BTG2, TTYH1, USP3, CHD7, OSM, ARHGEF10L, LYST, TRIOBP, SLC9A1, POLA2, MYC, IL1B, CCL5, DDIT4, CCL3, MYADM, IRF8, PMEPA1, PTX3, ATP6V0D1, S100A8, MARK1	45	6265	16792	1.42949	1	0.226411	0.208146
GOTERM_BP_ALL	GO:1902532~negative regulation of intracellular signal transduction	5	10.8696	0.0305653	NLRP12, MYC, IL1B, DDIT4, MYADM	45	454	16792	4.10964	1	0.227109	0.208787
GOTERM_BP_ALL	GO:0019058~viral life cycle	5	10.8696	0.0307787	SCARB1, CCL5, CCL3, PTX3, CTSB	45	455	16792	4.10061	1	0.227546	0.20919
GOTERM_BP_ALL	GO:0051928~positive regulation of calcium ion transport	3	6.52174	0.0308968	CCL5, CCL3, SLC9A1	45	105	16792	10.6616	1	0.227546	0.20919
GOTERM_BP_ALL	GO:0042107~cytokine metabolic process	3	6.52174	0.0308968	NLRP12, IL1B, IFNAR1	45	105	16792	10.6616	1	0.227546	0.20919
GOTERM_BP_ALL	GO:0035747~natural killer cell chemotaxis	2	4.34783	0.0310043	CCL5, CCL3	45	12	16792	62.1926	1	0.227668	0.209302
GOTERM_BP_ALL	GO:0046483~heterocycle metabolic process	23	50	0.031164	RBM38, ZHX2, BTG2, USP3, CHD7, OSM, ARHGEF10L, SLC9A1, POLA2, NLRP12, HLX, MYC, IL1B, CCL5, DDIT4, CCL3, IRF8, S100A12, TK2, TRIB1, CCNL1, S100A8, IFNAR1	45	5919	16792	1.45	1	0.228171	0.209765
GOTERM_BP_ALL	GO:0051222~positive regulation of protein transport	5	10.8696	0.0318592	NLRP12, IL1B, CCL3, SLC9A1, IFNAR1	45	460	16792	4.05604	1	0.232581	0.213819
GOTERM_BP_ALL	GO:0042742~defense response to bacterium	4	8.69565	0.0323119	IRF8, S100A12, LYST, S100A8	45	266	16792	5.61136	1	0.233409	0.21458
GOTERM_BP_ALL	GO:0022008~neurogenesis	9	19.5652	0.032389	ROBO2, ZHX2, BTG2, MYC, CHD7, DDIT4, CCL3, S100A8, MARK1	45	1447	16792	2.32094	1	0.233409	0.21458
GOTERM_BP_ALL	GO:0007420~brain development	6	13.0435	0.0323893	ROBO2, BTG2, MYC, CHD7, DDIT4, ATP6V0D1	45	684	16792	3.27329	1	0.233409	0.21458
GOTERM_BP_ALL	GO:0046660~female sex differentiation	3	6.52174	0.0325359	ROBO2, MYC, CHD7	45	108	16792	10.3654	1	0.233409	0.21458
GOTERM_BP_ALL	GO:0048525~negative regulation of viral process	3	6.52174	0.0325359	CCL5, CCL3, PTX3	45	108	16792	10.3654	1	0.233409	0.21458
GOTERM_BP_ALL	GO:0030334~regulation of cell migration	6	13.0435	0.032565	SCARB1, CCL5, MYC, CCL3, MYADM, TRIB1	45	685	16792	3.26852	1	0.233409	0.21458
GOTERM_BP_ALL	GO:0044707~single-multicellular organism process	23	50	0.032625	ROBO2, SCARB1, ZHX2, BTG2, IGSF3, CHD7, OSM, SLC9A1, NLRP12, HLX, MYC, IL1B, DDIT4, CCL3, MYADM, IRF8, S100A12, TRIB1, ATP6V0D1, S100A8, CTSB, MARK1, IFNAR1	45	5943	16792	1.44415	1	0.233409	0.21458
GOTERM_BP_ALL	GO:0015833~peptide transport	4	8.69565	0.0329308	CCL5, IL1B, CHD7, S100A8	45	268	16792	5.56949	1	0.234925	0.215973
GOTERM_BP_ALL	GO:0048659~smooth muscle cell proliferation	3	6.52174	0.0330898	CCL5, MYC, TRIB1	45	109	16792	10.2703	1	0.235389	0.2164
GOTERM_BP_ALL	GO:0045184~establishment of protein localization	11	23.913	0.0333263	POLA2, NLRP12, CCL5, IL1B, CCL3, MYADM, S100A12, ATP6V0D1, LYST, SLC9A1, IFNAR1	45	2021	16792	2.03103	1	0.235492	0.216495
GOTERM_BP_ALL	GO:0043922~negative regulation by host of viral transcription	2	4.34783	0.0335452	CCL5, CCL3	45	13	16792	57.4085	1	0.235492	0.216495
GOTERM_BP_ALL	GO:0006811~ion transport	9	19.5652	0.0336812	ACSL1, TTYH1, CCL5, MYC, IL1B, CHD7, CCL3, ATP6V0D1, SLC9A1	45	1458	16792	2.30343	1	0.235492	0.216495
GOTERM_BP_ALL	GO:0009058~biosynthetic process	24	52.1739	0.0336825	SCARB1, ZHX2, BTG2, ACSL1, USP3, CHD7, OSM, ARHGEF10L, SLC9A1, POLA2, NLRP12, HLX, MYC, IL1B, CCL5, CCL3, IRF8, S100A12, TK2, PTX3, TRIB1, CCNL1, S100A8, IFNAR1	45	6320	16792	1.41705	1	0.235492	0.216495
GOTERM_BP_ALL	GO:0045860~positive regulation of protein kinase activity	5	10.8696	0.034087	ACSL1, CCL5, IL1B, S100A12, CCNL1	45	470	16792	3.96974	1	0.235492	0.216495
GOTERM_BP_ALL	GO:0031331~positive regulation of cellular catabolic process	4	8.69565	0.0341872	BTG2, MYC, IL1B, TRIB1	45	272	16792	5.48758	1	0.235492	0.216495
GOTERM_BP_ALL	GO:0051806~entry into cell of other organism involved in symbiotic interaction	3	6.52174	0.0342086	SCARB1, PTX3, CTSB	45	111	16792	10.0853	1	0.235492	0.216495
GOTERM_BP_ALL	GO:0051828~entry into other organism involved in symbiotic interaction	3	6.52174	0.0342086	SCARB1, PTX3, CTSB	45	111	16792	10.0853	1	0.235492	0.216495
GOTERM_BP_ALL	GO:0046718~viral entry into host cell	3	6.52174	0.0342086	SCARB1, PTX3, CTSB	45	111	16792	10.0853	1	0.235492	0.216495
GOTERM_BP_ALL	GO:0044409~entry into host	3	6.52174	0.0342086	SCARB1, PTX3, CTSB	45	111	16792	10.0853	1	0.235492	0.216495
GOTERM_BP_ALL	GO:0030260~entry into host cell	3	6.52174	0.0342086	SCARB1, PTX3, CTSB	45	111	16792	10.0853	1	0.235492	0.216495
GOTERM_BP_ALL	GO:0048584~positive regulation of response to stimulus	11	23.913	0.0342329	NLRP12, HLX, CCL5, MYC, IL1B, OSM, CCL3, S100A12, S100A8, SLC9A1, CTSB	45	2030	16792	2.02203	1	0.235492	0.216495
GOTERM_BP_ALL	GO:0044237~cellular metabolic process	34	73.913	0.0345884	SCARB1, BTG2, CPQ, CHD7, ARHGEF10L, TRIOBP, SLC9A1, HLX, MYC, CCL5, CCL3, S100A12, PMEPA1, TK2, LONRF1, CCNL1, CTSB, MARK1, RBM38, ZHX2, ACSL1, USP3, OSM, PTPRE, NLRP12, POLA2, IL1B, DDIT4, MYADM, IRF8, PTX3, TRIB1, S100A8, IFNAR1	45	10202	16792	1.24361	1	0.237286	0.218144
GOTERM_BP_ALL	GO:0002521~leukocyte differentiation	5	10.8696	0.0350033	HLX, MYC, CHD7, CCL3, TRIB1	45	474	16792	3.93624	1	0.239476	0.220157
GOTERM_BP_ALL	GO:0008286~insulin receptor signaling pathway	3	6.52174	0.0353422	PTPRE, IL1B, ATP6V0D1	45	113	16792	9.90678	1	0.239639	0.220307
GOTERM_BP_ALL	GO:0048660~regulation of smooth muscle cell proliferation	3	6.52174	0.0353422	CCL5, MYC, TRIB1	45	113	16792	9.90678	1	0.239639	0.220307
GOTERM_BP_ALL	GO:0002761~regulation of myeloid leukocyte differentiation	3	6.52174	0.0353422	MYC, CCL3, TRIB1	45	113	16792	9.90678	1	0.239639	0.220307
GOTERM_BP_ALL	GO:0071900~regulation of protein serine/threonine kinase activity	5	10.8696	0.0354668	ACSL1, IL1B, S100A12, CCNL1, TRIB1	45	476	16792	3.9197	1	0.239639	0.220307
GOTERM_BP_ALL	GO:0032502~developmental process	22	47.8261	0.0355205	ROBO2, RBM38, ZHX2, BTG2, IGSF3, CPQ, CHD7, OSM, TRIOBP, SLC9A1, HLX, MYC, IL1B, DDIT4, CCL3, MYADM, IRF8, TRIB1, ATP6V0D1, S100A8, CTSB, MARK1	45	5632	16792	1.45764	1	0.239639	0.220307
GOTERM_BP_ALL	GO:0071417~cellular response to organonitrogen compound	5	10.8696	0.0357	PTPRE, MYC, IL1B, ATP6V0D1, SLC9A1	45	477	16792	3.91148	1	0.239639	0.220307
GOTERM_BP_ALL	GO:0006909~phagocytosis	4	8.69565	0.0357927	SCARB1, IL1B, IRF8, PTX3	45	277	16792	5.38853	1	0.239639	0.220307
GOTERM_BP_ALL	GO:0070997~neuron death	4	8.69565	0.0357927	BTG2, DDIT4, CCL3, SLC9A1	45	277	16792	5.38853	1	0.239639	0.220307
GOTERM_BP_ALL	GO:0070555~response to interleukin-1	3	6.52174	0.0359145	CCL5, MYC, CCL3	45	114	16792	9.81988	1	0.239813	0.220467
GOTERM_BP_ALL	GO:0006606~protein import into nucleus	4	8.69565	0.0367745	POLA2, NLRP12, IL1B, SLC9A1	45	280	16792	5.33079	1	0.244004	0.22432
GOTERM_BP_ALL	GO:0044744~protein targeting to nucleus	4	8.69565	0.0367745	POLA2, NLRP12, IL1B, SLC9A1	45	280	16792	5.33079	1	0.244004	0.22432
GOTERM_BP_ALL	GO:0031333~negative regulation of protein complex assembly	3	6.52174	0.0370698	MYADM, PMEPA1, TRIOBP	45	116	16792	9.65057	1	0.244004	0.22432
GOTERM_BP_ALL	GO:1902593~single-organism nuclear import	4	8.69565	0.0371049	POLA2, NLRP12, IL1B, SLC9A1	45	281	16792	5.31182	1	0.244004	0.22432
GOTERM_BP_ALL	GO:0010720~positive regulation of cell development	5	10.8696	0.0371175	ROBO2, MYC, MYADM, TRIB1, TRIOBP	45	483	16792	3.86289	1	0.244004	0.22432
GOTERM_BP_ALL	GO:0051338~regulation of transferase activity	7	15.2174	0.0371268	ACSL1, CCL5, MYC, IL1B, S100A12, CCNL1, TRIB1	45	955	16792	2.73517	1	0.244004	0.22432
GOTERM_BP_ALL	GO:0010467~gene expression	21	45.6522	0.0373243	RBM38, ZHX2, BTG2, USP3, CHD7, OSM, ARHGEF10L, SLC9A1, NLRP12, HLX, MYC, IL1B, CCL5, CCL3, MYADM, IRF8, S100A12, TRIB1, CCNL1, S100A8, IFNAR1	45	5306	16792	1.47687	1	0.24466	0.224923
GOTERM_BP_ALL	GO:0043410~positive regulation of MAPK cascade	5	10.8696	0.0375973	CCL5, IL1B, OSM, CCL3, S100A12	45	485	16792	3.84696	1	0.245528	0.225721
GOTERM_BP_ALL	GO:0046824~positive regulation of nucleocytoplasmic transport	3	6.52174	0.0376528	NLRP12, IL1B, SLC9A1	45	117	16792	9.56809	1	0.245528	0.225721
GOTERM_BP_ALL	GO:0033554~cellular response to stress	10	21.7391	0.0377806	RBM38, BTG2, MYC, IL1B, USP3, DDIT4, ARHGEF10L, ATP6V0D1, TRIB1, SLC9A1	45	1773	16792	2.10466	1	0.245721	0.225898
GOTERM_BP_ALL	GO:0048731~system development	18	39.1304	0.0384306	ROBO2, ZHX2, BTG2, IGSF3, CHD7, OSM, SLC9A1, HLX, MYC, IL1B, DDIT4, CCL3, IRF8, TRIB1, ATP6V0D1, S100A8, CTSB, MARK1	45	4291	16792	1.56532	1	0.248517	0.228469
GOTERM_BP_ALL	GO:0043903~regulation of symbiosis, encompassing mutualism through parasitism	4	8.69565	0.0384418	CCL5, CCL3, IRF8, PTX3	45	285	16792	5.23727	1	0.248517	0.228469
GOTERM_BP_ALL	GO:0072677~eosinophil migration	2	4.34783	0.0386074	CCL5, CCL3	45	15	16792	49.7541	1	0.248517	0.228469
GOTERM_BP_ALL	GO:0042226~interleukin-6 biosynthetic process	2	4.34783	0.0386074	NLRP12, IL1B	45	15	16792	49.7541	1	0.248517	0.228469
GOTERM_BP_ALL	GO:0043280~positive regulation of cysteine-type endopeptidase activity involved in apoptotic process	3	6.52174	0.0388295	NLRP12, MYC, S100A8	45	119	16792	9.40728	1	0.249305	0.229193
GOTERM_BP_ALL	GO:0060322~head development	6	13.0435	0.0390986	ROBO2, BTG2, MYC, CHD7, DDIT4, ATP6V0D1	45	720	16792	3.10963	1	0.250204	0.230019
GOTERM_BP_ALL	GO:0044699~single-organism process	41	89.1304	0.0391893	ROBO2, SCARB1, BTG2, IGSF3, TTYH1, CPQ, CHD7, ARHGEF10L, LYST, TRIOBP, SLC9A1, PSTPIP1, HLX, MYC, CCL5, PSD4, CCL3, S100A12, PMEPA1, TK2, CCNL1, CTSB, MARK1, RBM38, ZHX2, ACSL1, USP3, OSM, PTPRE, NLRP12, POLA2, IL1B, DDIT4, MYADM, IRF8, RIN3, PTX3, ATP6V0D1, TRIB1, S100A8, IFNAR1	45	13377	16792	1.14371	1	0.250204	0.230019
GOTERM_BP_ALL	GO:0000278~mitotic cell cycle	7	15.2174	0.0392692	RBM38, POLA2, BTG2, TTYH1, IL1B, USP3, TRIOBP	45	968	16792	2.69844	1	0.250204	0.230019
GOTERM_BP_ALL	GO:0042886~amide transport	4	8.69565	0.0398033	CCL5, IL1B, CHD7, S100A8	45	289	16792	5.16478	1	0.252963	0.232556
GOTERM_BP_ALL	GO:0045859~regulation of protein kinase activity	6	13.0435	0.0411041	ACSL1, CCL5, IL1B, S100A12, CCNL1, TRIB1	45	730	16792	3.06703	1	0.260016	0.23904
GOTERM_BP_ALL	GO:0045408~regulation of interleukin-6 biosynthetic process	2	4.34783	0.0411288	NLRP12, IL1B	45	16	16792	46.6444	1	0.260016	0.23904
GOTERM_BP_ALL	GO:0051238~sequestering of metal ion	3	6.52174	0.0412246	CHD7, CCL3, S100A8	45	123	16792	9.10136	1	0.260016	0.23904
GOTERM_BP_ALL	GO:0034645~cellular macromolecule biosynthetic process	20	43.4783	0.0414291	ZHX2, BTG2, USP3, CHD7, OSM, ARHGEF10L, SLC9A1, POLA2, NLRP12, HLX, MYC, IL1B, CCL5, IRF8, S100A12, TK2, TRIB1, CCNL1, S100A8, IFNAR1	45	5012	16792	1.48905	1	0.260649	0.239623
GOTERM_BP_ALL	GO:0032956~regulation of actin cytoskeleton organization	4	8.69565	0.0415396	MYADM, ARHGEF10L, TRIOBP, SLC9A1	45	294	16792	5.07695	1	0.260689	0.239659
GOTERM_BP_ALL	GO:0046879~hormone secretion	4	8.69565	0.0418914	CCL5, IL1B, CHD7, OSM	45	295	16792	5.05974	1	0.26224	0.241085
GOTERM_BP_ALL	GO:2000145~regulation of cell motility	6	13.0435	0.0423374	SCARB1, CCL5, MYC, CCL3, MYADM, TRIB1	45	736	16792	3.04203	1	0.264371	0.243044
GOTERM_BP_ALL	GO:0033674~positive regulation of kinase activity	5	10.8696	0.0425936	ACSL1, CCL5, IL1B, S100A12, CCNL1	45	505	16792	3.69461	1	0.265309	0.243907
GOTERM_BP_ALL	GO:0030097~hemopoiesis	6	13.0435	0.0429624	HLX, MYC, CHD7, CCL3, IRF8, TRIB1	45	739	16792	3.02968	1	0.266282	0.244801
GOTERM_BP_ALL	GO:0051093~negative regulation of developmental process	6	13.0435	0.0429624	ROBO2, ZHX2, HLX, MYC, CCL3, TRIB1	45	739	16792	3.02968	1	0.266282	0.244801
GOTERM_BP_ALL	GO:0051170~nuclear import	4	8.69565	0.0433139	POLA2, NLRP12, IL1B, SLC9A1	45	299	16792	4.99205	1	0.267798	0.246194
GOTERM_BP_ALL	GO:0010829~negative regulation of glucose transport	2	4.34783	0.0436437	MYC, IL1B	45	17	16792	43.9007	1	0.268693	0.247017
GOTERM_BP_ALL	GO:0071902~positive regulation of protein serine/threonine kinase activity	4	8.69565	0.0436733	ACSL1, IL1B, S100A12, CCNL1	45	300	16792	4.97541	1	0.268693	0.247017
GOTERM_BP_ALL	GO:1900182~positive regulation of protein localization to nucleus	3	6.52174	0.0442953	NLRP12, IL1B, SLC9A1	45	128	16792	8.74583	1	0.271187	0.24931
GOTERM_BP_ALL	GO:2001056~positive regulation of cysteine-type endopeptidase activity	3	6.52174	0.0442953	NLRP12, MYC, S100A8	45	128	16792	8.74583	1	0.271187	0.24931
GOTERM_BP_ALL	GO:0051223~regulation of protein transport	6	13.0435	0.0444428	NLRP12, CCL5, IL1B, CCL3, SLC9A1, IFNAR1	45	746	16792	3.00125	1	0.271426	0.24953
GOTERM_BP_ALL	GO:0050793~regulation of developmental process	11	23.913	0.0454025	RBM38, ROBO2, ZHX2, HLX, MYC, IL1B, CHD7, CCL3, MYADM, TRIB1, TRIOBP	45	2129	16792	1.928	1	0.276613	0.254298
GOTERM_BP_ALL	GO:1904951~positive regulation of establishment of protein localization	5	10.8696	0.0457652	NLRP12, IL1B, CCL3, SLC9A1, IFNAR1	45	517	16792	3.60885	1	0.277385	0.255008
GOTERM_BP_ALL	GO:0009914~hormone transport	4	8.69565	0.0458616	CCL5, IL1B, CHD7, OSM	45	306	16792	4.87785	1	0.277385	0.255008
GOTERM_BP_ALL	GO:0031589~cell-substrate adhesion	4	8.69565	0.0458616	TTYH1, MYADM, TRIOBP, SLC9A1	45	306	16792	4.87785	1	0.277385	0.255008
GOTERM_BP_ALL	GO:0010818~T cell chemotaxis	2	4.34783	0.0461522	CCL5, CCL3	45	18	16792	41.4617	1	0.27847	0.256006
GOTERM_BP_ALL	GO:0051302~regulation of cell division	3	6.52174	0.0474487	MYC, IL1B, OSM	45	133	16792	8.41704	1	0.28492	0.261935
GOTERM_BP_ALL	GO:0051092~positive regulation of NF-kappaB transcription factor activity	3	6.52174	0.0474487	IL1B, S100A12, S100A8	45	133	16792	8.41704	1	0.28492	0.261935
GOTERM_BP_ALL	GO:0009615~response to virus	4	8.69565	0.0477264	CCL5, DDIT4, LYST, IFNAR1	45	311	16792	4.79943	1	0.285902	0.262838
GOTERM_BP_ALL	GO:0034114~regulation of heterotypic cell-cell adhesion	2	4.34783	0.0486543	IL1B, MYADM	45	19	16792	39.2795	1	0.290072	0.266672
GOTERM_BP_ALL	GO:0042832~defense response to protozoan	2	4.34783	0.0486543	IRF8, LYST	45	19	16792	39.2795	1	0.290072	0.266672
GOTERM_BP_ALL	GO:0043933~macromolecular complex subunit organization	12	26.087	0.0488911	SCARB1, CCL5, MYC, IL1B, USP3, CHD7, DDIT4, MYADM, IRF8, PMEPA1, TRIOBP, SLC9A1	45	2461	16792	1.81953	1	0.290792	0.267333
GOTERM_BP_ALL	GO:0008283~cell proliferation	10	21.7391	0.0491776	RBM38, SCARB1, BTG2, HLX, CCL5, MYC, IL1B, DDIT4, OSM, TRIB1	45	1861	16792	2.00513	1	0.291803	0.268263

## Sheet: SUPER.EC24
Category	Term	Count	%	PValue	Genes	List Total	Pop Hits	Pop Total	Fold Enrichment	Bonferroni	Benjamini	FDR
GOTERM_BP_ALL	GO:0070887~cellular response to chemical stimulus	21	51.2195	1.57419e-07	ROBO2, CCR1, SCARB1, SMAD3, ACSL1, SMAD6, LYST, DUSP6, SLC9A1, PTPRE, NLRP12, IL1B, IRF8, PMEPA1, S100A12, CD14, TRIB1, ATP6V0D1, S100A8, CTSB, IFNAR1	39	2648	16792	3.41459	0.000321398	0.00032145	0.000296578
GOTERM_BP_ALL	GO:0071310~cellular response to organic substance	18	43.9024	1.58591e-06	ROBO2, CCR1, SCARB1, SMAD3, ACSL1, SMAD6, DUSP6, SLC9A1, PTPRE, NLRP12, IL1B, IRF8, PMEPA1, CD14, TRIB1, ATP6V0D1, CTSB, IFNAR1	39	2186	16792	3.54536	0.00323318	0.00161921	0.00149392
GOTERM_BP_ALL	GO:0010033~response to organic substance	19	46.3415	1.18913e-05	ROBO2, CCR1, SCARB1, SMAD3, ACSL1, SMAD6, DUSP6, SLC9A1, PTPRE, NLRP12, IL1B, IRF8, PMEPA1, CD14, TRIB1, ATP6V0D1, S100A8, CTSB, IFNAR1	39	2822	16792	2.89891	0.0239897	0.00755467	0.00697012
GOTERM_BP_ALL	GO:0007165~signal transduction	27	65.8537	1.92956e-05	ROBO2, SCARB1, HIP1, ARHGEF10L, SLC9A1, PSD4, S100A12, PMEPA1, CD14, CTSB, CCR1, SRGN, RBM38, SMAD3, ACSL1, SMAD6, DUSP6, PTPRE, NLRP12, IL1B, MYADM, IRF8, RIN3, ATP6V0D1, TRIB1, S100A8, IFNAR1	39	5775	16792	2.01303	0.0386358	0.00755467	0.00697012
GOTERM_BP_ALL	GO:0009617~response to bacterium	9	21.9512	2.3889e-05	SCARB1, IL1B, IRF8, S100A12, CD14, TRIB1, LYST, S100A8, IFNAR1	39	544	16792	7.1233	0.0476111	0.00755467	0.00697012
GOTERM_BP_ALL	GO:0048583~regulation of response to stimulus	21	51.2195	2.70652e-05	ROBO2, CCR1, HIP1, SMAD3, ARHGEF10L, SMAD6, DUSP6, SLC9A1, PTPRE, NLRP12, IL1B, PSD4, MYADM, PMEPA1, S100A12, CD14, TRIB1, S100A8, LAIR1, CTSB, IFNAR1	39	3636	16792	2.48676	0.0537684	0.00755467	0.00697012
GOTERM_BP_ALL	GO:0006950~response to stress	21	51.2195	3.21705e-05	CCR1, RBM38, SCARB1, SMAD3, CPQ, USP3, ARHGEF10L, SMAD6, LYST, DUSP6, SLC9A1, NLRP12, IL1B, IRF8, S100A12, CD14, TRIB1, ATP6V0D1, S100A8, CTSB, IFNAR1	39	3677	16792	2.45903	0.063582	0.00755467	0.00697012
GOTERM_BP_ALL	GO:0050663~cytokine secretion	6	14.6341	3.32893e-05	SRGN, NLRP12, IL1B, S100A12, CD14, IFNAR1	39	165	16792	15.6569	0.0657188	0.00755467	0.00697012
GOTERM_BP_ALL	GO:0009966~regulation of signal transduction	18	43.9024	3.32968e-05	CCR1, HIP1, SMAD3, ARHGEF10L, SMAD6, DUSP6, SLC9A1, PTPRE, NLRP12, IL1B, PSD4, MYADM, PMEPA1, S100A12, CD14, TRIB1, S100A8, IFNAR1	39	2728	16792	2.84097	0.0657331	0.00755467	0.00697012
GOTERM_BP_ALL	GO:0051716~cellular response to stimulus	29	70.7317	5.06197e-05	ROBO2, SCARB1, HIP1, ARHGEF10L, LYST, SLC9A1, PSD4, S100A12, PMEPA1, CD14, CTSB, CCR1, SRGN, RBM38, SMAD3, ACSL1, USP3, SMAD6, DUSP6, PTPRE, NLRP12, IL1B, MYADM, IRF8, RIN3, ATP6V0D1, TRIB1, S100A8, IFNAR1	39	6927	16792	1.80256	0.0982049	0.0101502	0.00936484
GOTERM_BP_ALL	GO:0032496~response to lipopolysaccharide	7	17.0732	5.47506e-05	SCARB1, IL1B, IRF8, CD14, TRIB1, S100A8, IFNAR1	39	302	16792	9.97996	0.10578	0.0101502	0.00936484
GOTERM_BP_ALL	GO:0001816~cytokine production	9	21.9512	6.84791e-05	SRGN, NLRP12, SMAD3, IL1B, IRF8, S100A12, CD14, S100A8, IFNAR1	39	631	16792	6.14117	0.130502	0.0101502	0.00936484
GOTERM_BP_ALL	GO:0002237~response to molecule of bacterial origin	7	17.0732	7.03795e-05	SCARB1, IL1B, IRF8, CD14, TRIB1, S100A8, IFNAR1	39	316	16792	9.53781	0.13387	0.0101502	0.00936484
GOTERM_BP_ALL	GO:0043207~response to external biotic stimulus	10	24.3902	7.45609e-05	SCARB1, SMAD3, IL1B, IRF8, S100A12, CD14, TRIB1, LYST, S100A8, IFNAR1	39	829	16792	5.19378	0.141234	0.0101502	0.00936484
GOTERM_BP_ALL	GO:0051707~response to other organism	10	24.3902	7.45609e-05	SCARB1, SMAD3, IL1B, IRF8, S100A12, CD14, TRIB1, LYST, S100A8, IFNAR1	39	829	16792	5.19378	0.141234	0.0101502	0.00936484
GOTERM_BP_ALL	GO:0044700~single organism signaling	27	65.8537	8.08605e-05	ROBO2, SCARB1, HIP1, ARHGEF10L, SLC9A1, PSD4, S100A12, PMEPA1, CD14, CTSB, CCR1, SRGN, RBM38, SMAD3, ACSL1, SMAD6, DUSP6, PTPRE, NLRP12, IL1B, MYADM, IRF8, RIN3, ATP6V0D1, TRIB1, S100A8, IFNAR1	39	6207	16792	1.87292	0.152211	0.0102555	0.009462
GOTERM_BP_ALL	GO:0023052~signaling	27	65.8537	9.54239e-05	ROBO2, SCARB1, HIP1, ARHGEF10L, SLC9A1, PSD4, S100A12, PMEPA1, CD14, CTSB, CCR1, SRGN, RBM38, SMAD3, ACSL1, SMAD6, DUSP6, PTPRE, NLRP12, IL1B, MYADM, IRF8, RIN3, ATP6V0D1, TRIB1, S100A8, IFNAR1	39	6260	16792	1.85707	0.177054	0.0102555	0.009462
GOTERM_BP_ALL	GO:0009605~response to external stimulus	15	36.5854	9.79049e-05	ROBO2, CCR1, SCARB1, SMAD3, ACSL1, LYST, SLC9A1, NLRP12, IL1B, IRF8, S100A12, CD14, TRIB1, S100A8, IFNAR1	39	2073	16792	3.11551	0.181213	0.0102555	0.009462
GOTERM_BP_ALL	GO:0007154~cell communication	27	65.8537	9.99641e-05	ROBO2, SCARB1, HIP1, ARHGEF10L, SLC9A1, PSD4, S100A12, PMEPA1, CD14, CTSB, CCR1, SRGN, RBM38, SMAD3, ACSL1, SMAD6, DUSP6, PTPRE, NLRP12, IL1B, MYADM, IRF8, RIN3, ATP6V0D1, TRIB1, S100A8, IFNAR1	39	6275	16792	1.85263	0.184649	0.0102555	0.009462
GOTERM_BP_ALL	GO:0051239~regulation of multicellular organismal process	17	41.4634	0.000100446	ROBO2, CCR1, SRGN, SCARB1, ZHX2, SMAD3, SMAD6, DUSP6, SLC9A1, NLRP12, IL1B, BMP2K, MYADM, IRF8, CD14, TRIB1, IFNAR1	39	2659	16792	2.75276	0.185451	0.0102555	0.009462
GOTERM_BP_ALL	GO:0009607~response to biotic stimulus	10	24.3902	0.000110902	SCARB1, SMAD3, IL1B, IRF8, S100A12, CD14, TRIB1, LYST, S100A8, IFNAR1	39	873	16792	4.93201	0.20266	0.0107839	0.00994949
GOTERM_BP_ALL	GO:0010646~regulation of cell communication	18	43.9024	0.000125746	CCR1, HIP1, SMAD3, ARHGEF10L, SMAD6, DUSP6, SLC9A1, PTPRE, NLRP12, IL1B, PSD4, MYADM, PMEPA1, S100A12, CD14, TRIB1, S100A8, IFNAR1	39	3020	16792	2.56628	0.226469	0.0116715	0.0107684
GOTERM_BP_ALL	GO:0023051~regulation of signaling	18	43.9024	0.000155115	CCR1, HIP1, SMAD3, ARHGEF10L, SMAD6, DUSP6, SLC9A1, PTPRE, NLRP12, IL1B, PSD4, MYADM, PMEPA1, S100A12, CD14, TRIB1, S100A8, IFNAR1	39	3070	16792	2.52448	0.271501	0.0137715	0.0127059
GOTERM_BP_ALL	GO:0042221~response to chemical	21	51.2195	0.000175892	ROBO2, CCR1, SCARB1, SMAD3, ACSL1, SMAD6, LYST, DUSP6, SLC9A1, PTPRE, NLRP12, IL1B, IRF8, PMEPA1, S100A12, CD14, TRIB1, ATP6V0D1, S100A8, CTSB, IFNAR1	39	4117	16792	2.19622	0.301767	0.0147268	0.0135873
GOTERM_BP_ALL	GO:0031663~lipopolysaccharide-mediated signaling pathway	4	9.7561	0.000183325	SCARB1, IL1B, CD14, TRIB1	39	49	16792	35.1481	0.312288	0.0147268	0.0135873
GOTERM_BP_ALL	GO:0050896~response to stimulus	31	75.6098	0.00019395	ROBO2, SCARB1, HIP1, CPQ, ARHGEF10L, LYST, SLC9A1, PSD4, S100A12, PMEPA1, CD14, LAIR1, CTSB, CCR1, SRGN, RBM38, SMAD3, ACSL1, USP3, SMAD6, DUSP6, PTPRE, NLRP12, IL1B, MYADM, IRF8, RIN3, ATP6V0D1, TRIB1, S100A8, IFNAR1	39	8329	16792	1.60253	0.32705	0.0147268	0.0135873
GOTERM_BP_ALL	GO:0042993~positive regulation of transcription factor import into nucleus	4	9.7561	0.000194723	NLRP12, SMAD3, IL1B, SLC9A1	39	50	16792	34.4451	0.328112	0.0147268	0.0135873
GOTERM_BP_ALL	GO:0016477~cell migration	11	26.8293	0.000223336	CCR1, SCARB1, NLRP12, SMAD3, IL1B, MYADM, S100A12, TRIB1, LYST, S100A8, SLC9A1	39	1184	16792	4.00017	0.366252	0.0162876	0.0150273
GOTERM_BP_ALL	GO:0001933~negative regulation of protein phosphorylation	7	17.0732	0.000231623	NLRP12, IL1B, MYADM, PMEPA1, SMAD6, TRIB1, DUSP6	39	393	16792	7.66908	0.376888	0.0163095	0.0150475
GOTERM_BP_ALL	GO:0032611~interleukin-1 beta production	4	9.7561	0.000287536	NLRP12, SMAD3, IL1B, IFNAR1	39	57	16792	30.215	0.444137	0.0195716	0.0180573
GOTERM_BP_ALL	GO:0032103~positive regulation of response to external stimulus	6	14.6341	0.000319885	CCR1, NLRP12, SMAD3, IL1B, S100A12, S100A8	39	267	16792	9.6756	0.479679	0.0210297	0.0194025
GOTERM_BP_ALL	GO:0071222~cellular response to lipopolysaccharide	5	12.1951	0.00034757	SCARB1, IL1B, IRF8, CD14, TRIB1	39	149	16792	14.4485	0.508287	0.0210297	0.0194025
GOTERM_BP_ALL	GO:0050707~regulation of cytokine secretion	5	12.1951	0.000356515	SRGN, NLRP12, IL1B, CD14, IFNAR1	39	150	16792	14.3521	0.517191	0.0210297	0.0194025
GOTERM_BP_ALL	GO:0042326~negative regulation of phosphorylation	7	17.0732	0.000365974	NLRP12, IL1B, MYADM, PMEPA1, SMAD6, TRIB1, DUSP6	39	428	16792	7.04194	0.52643	0.0210297	0.0194025
GOTERM_BP_ALL	GO:0007183~SMAD protein complex assembly	3	7.31707	0.000382888	SMAD3, PMEPA1, SMAD6	39	13	16792	99.3609	0.542513	0.0210297	0.0194025
GOTERM_BP_ALL	GO:0050790~regulation of catalytic activity	15	36.5854	0.000388709	SCARB1, HIP1, SMAD3, ACSL1, ARHGEF10L, DUSP6, NLRP12, IL1B, PSD4, BMP2K, S100A12, RIN3, TRIB1, S100A8, CTSB	39	2357	16792	2.74012	0.547921	0.0210297	0.0194025
GOTERM_BP_ALL	GO:0007166~cell surface receptor signaling pathway	16	39.0244	0.000401982	ROBO2, CCR1, SCARB1, HIP1, SMAD3, ACSL1, SMAD6, PTPRE, NLRP12, IL1B, IRF8, PMEPA1, CD14, TRIB1, ATP6V0D1, IFNAR1	39	2669	16792	2.58113	0.560014	0.0210297	0.0194025
GOTERM_BP_ALL	GO:0071219~cellular response to molecule of bacterial origin	5	12.1951	0.000403737	SCARB1, IL1B, IRF8, CD14, TRIB1	39	155	16792	13.8892	0.561589	0.0210297	0.0194025
GOTERM_BP_ALL	GO:0032870~cellular response to hormone stimulus	8	19.5122	0.000404627	ROBO2, PTPRE, ACSL1, IL1B, PMEPA1, ATP6V0D1, SLC9A1, CTSB	39	616	16792	5.59174	0.562385	0.0210297	0.0194025
GOTERM_BP_ALL	GO:0040011~locomotion	12	29.2683	0.000411943	ROBO2, CCR1, SCARB1, NLRP12, SMAD3, IL1B, MYADM, S100A12, TRIB1, LYST, S100A8, SLC9A1	39	1530	16792	3.37697	0.568876	0.0210297	0.0194025
GOTERM_BP_ALL	GO:0032729~positive regulation of interferon-gamma production	4	9.7561	0.000423919	IL1B, IRF8, CD14, IFNAR1	39	65	16792	26.4963	0.579296	0.0211132	0.0194796
GOTERM_BP_ALL	GO:0006955~immune response	12	29.2683	0.000463227	CCR1, SMAD3, IL1B, IRF8, S100A12, CD14, SMAD6, LYST, S100A8, LAIR1, CTSB, IFNAR1	39	1551	16792	3.33125	0.611759	0.0219691	0.0202693
GOTERM_BP_ALL	GO:0001932~regulation of protein phosphorylation	11	26.8293	0.000474274	CCR1, NLRP12, ACSL1, IL1B, MYADM, PMEPA1, S100A12, SMAD6, TRIB1, DUSP6, IFNAR1	39	1300	16792	3.64323	0.620423	0.0219691	0.0202693
GOTERM_BP_ALL	GO:0030279~negative regulation of ossification	4	9.7561	0.000484111	SRGN, CCR1, SMAD3, SMAD6	39	68	16792	25.3273	0.627975	0.0219691	0.0202693
GOTERM_BP_ALL	GO:0043085~positive regulation of catalytic activity	12	29.2683	0.000484139	SCARB1, NLRP12, HIP1, SMAD3, ACSL1, IL1B, PSD4, S100A12, RIN3, ARHGEF10L, S100A8, DUSP6	39	1559	16792	3.31416	0.627996	0.0219691	0.0202693
GOTERM_BP_ALL	GO:0044093~positive regulation of molecular function	13	31.7073	0.000512207	SCARB1, HIP1, SMAD3, ACSL1, ARHGEF10L, DUSP6, SLC9A1, NLRP12, IL1B, PSD4, S100A12, RIN3, S100A8	39	1840	16792	3.04203	0.648728	0.0226721	0.0209178
GOTERM_BP_ALL	GO:0030500~regulation of bone mineralization	4	9.7561	0.000549531	SRGN, CCR1, SMAD3, BMP2K	39	71	16792	24.2571	0.674519	0.0226721	0.0209178
GOTERM_BP_ALL	GO:0048870~cell motility	11	26.8293	0.000568358	CCR1, SCARB1, NLRP12, SMAD3, IL1B, MYADM, S100A12, TRIB1, LYST, S100A8, SLC9A1	39	1330	16792	3.56106	0.686801	0.0226721	0.0209178
GOTERM_BP_ALL	GO:0051674~localization of cell	11	26.8293	0.000568358	CCR1, SCARB1, NLRP12, SMAD3, IL1B, MYADM, S100A12, TRIB1, LYST, S100A8, SLC9A1	39	1330	16792	3.56106	0.686801	0.0226721	0.0209178
GOTERM_BP_ALL	GO:0033993~response to lipid	9	21.9512	0.000568438	SCARB1, ACSL1, IL1B, IRF8, PMEPA1, CD14, TRIB1, S100A8, IFNAR1	39	860	16792	4.5059	0.686852	0.0226721	0.0209178
GOTERM_BP_ALL	GO:0032612~interleukin-1 production	4	9.7561	0.000572531	NLRP12, SMAD3, IL1B, IFNAR1	39	72	16792	23.9202	0.68946	0.0226721	0.0209178
GOTERM_BP_ALL	GO:0009968~negative regulation of signal transduction	10	24.3902	0.000577349	PTPRE, NLRP12, SMAD3, IL1B, MYADM, PMEPA1, CD14, SMAD6, TRIB1, DUSP6	39	1089	16792	3.95376	0.692502	0.0226721	0.0209178
GOTERM_BP_ALL	GO:0019220~regulation of phosphate metabolic process	12	29.2683	0.000637164	CCR1, NLRP12, SMAD3, ACSL1, IL1B, MYADM, PMEPA1, S100A12, SMAD6, TRIB1, DUSP6, IFNAR1	39	1610	16792	3.20917	0.727878	0.0237812	0.0219411
GOTERM_BP_ALL	GO:0071216~cellular response to biotic stimulus	5	12.1951	0.000638023	SCARB1, IL1B, IRF8, CD14, TRIB1	39	175	16792	12.3018	0.728355	0.0237812	0.0219411
GOTERM_BP_ALL	GO:0051174~regulation of phosphorus metabolic process	12	29.2683	0.000640531	CCR1, NLRP12, SMAD3, ACSL1, IL1B, MYADM, PMEPA1, S100A12, SMAD6, TRIB1, DUSP6, IFNAR1	39	1611	16792	3.20718	0.729744	0.0237812	0.0219411
GOTERM_BP_ALL	GO:0031347~regulation of defense response	8	19.5122	0.000704939	NLRP12, SMAD3, IL1B, S100A12, CD14, S100A8, CTSB, IFNAR1	39	676	16792	5.09543	0.763071	0.025564	0.0235859
GOTERM_BP_ALL	GO:0048585~negative regulation of response to stimulus	11	26.8293	0.000713588	ROBO2, PTPRE, NLRP12, SMAD3, IL1B, MYADM, PMEPA1, CD14, SMAD6, TRIB1, DUSP6	39	1369	16792	3.45961	0.767221	0.025564	0.0235859
GOTERM_BP_ALL	GO:0030278~regulation of ossification	5	12.1951	0.00073899	SRGN, CCR1, SMAD3, BMP2K, SMAD6	39	182	16792	11.8287	0.778996	0.025989	0.0239781
GOTERM_BP_ALL	GO:0070167~regulation of biomineral tissue development	4	9.7561	0.000750906	SRGN, CCR1, SMAD3, BMP2K	39	79	16792	21.8007	0.784313	0.025989	0.0239781
GOTERM_BP_ALL	GO:0031325~positive regulation of cellular metabolic process	16	39.0244	0.000790498	CCR1, SCARB1, HIP1, SMAD3, ACSL1, ARHGEF10L, SMAD6, DUSP6, SLC9A1, NLRP12, IL1B, IRF8, S100A12, TRIB1, S100A8, IFNAR1	39	2839	16792	2.42657	0.801077	0.0269033	0.0248217
GOTERM_BP_ALL	GO:0042325~regulation of phosphorylation	11	26.8293	0.00081746	CCR1, NLRP12, ACSL1, IL1B, MYADM, PMEPA1, S100A12, SMAD6, TRIB1, DUSP6, IFNAR1	39	1393	16792	3.4	0.811741	0.0273648	0.0252475
GOTERM_BP_ALL	GO:0065009~regulation of molecular function	16	39.0244	0.000865617	SCARB1, HIP1, SMAD3, ACSL1, ARHGEF10L, DUSP6, SLC9A1, NLRP12, IL1B, PSD4, BMP2K, S100A12, RIN3, TRIB1, S100A8, CTSB	39	2863	16792	2.40623	0.829387	0.0285095	0.0263036
GOTERM_BP_ALL	GO:0051050~positive regulation of transport	9	21.9512	0.000885864	CCR1, NLRP12, HIP1, SMAD3, IL1B, CD14, S100A8, SLC9A1, IFNAR1	39	920	16792	4.21204	0.836303	0.0287132	0.0264915
GOTERM_BP_ALL	GO:0030595~leukocyte chemotaxis	5	12.1951	0.000937647	CCR1, IL1B, S100A12, LYST, S100A8	39	194	16792	11.097	0.852743	0.0299168	0.027602
GOTERM_BP_ALL	GO:0006919~activation of cysteine-type endopeptidase activity involved in apoptotic process	4	9.7561	0.000994028	NLRP12, HIP1, SMAD3, S100A8	39	87	16792	19.7961	0.868771	0.0310046	0.0286056
GOTERM_BP_ALL	GO:0051240~positive regulation of multicellular organismal process	11	26.8293	0.00100751	ROBO2, CCR1, SCARB1, NLRP12, SMAD3, IL1B, IRF8, CD14, TRIB1, SLC9A1, IFNAR1	39	1431	16792	3.30972	0.872337	0.0310046	0.0286056
GOTERM_BP_ALL	GO:0032101~regulation of response to external stimulus	8	19.5122	0.0010299	ROBO2, CCR1, NLRP12, SMAD3, IL1B, S100A12, TRIB1, S100A8	39	721	16792	4.77741	0.878049	0.0310046	0.0286056
GOTERM_BP_ALL	GO:0010648~negative regulation of cell communication	10	24.3902	0.00104101	PTPRE, NLRP12, SMAD3, IL1B, MYADM, PMEPA1, CD14, SMAD6, TRIB1, DUSP6	39	1182	16792	3.64267	0.880788	0.0310046	0.0286056
GOTERM_BP_ALL	GO:0071495~cellular response to endogenous stimulus	10	24.3902	0.00105994	ROBO2, PTPRE, SMAD3, ACSL1, IL1B, PMEPA1, ATP6V0D1, SMAD6, SLC9A1, CTSB	39	1185	16792	3.63345	0.885314	0.0310046	0.0286056
GOTERM_BP_ALL	GO:0023057~negative regulation of signaling	10	24.3902	0.00106632	PTPRE, NLRP12, SMAD3, IL1B, MYADM, PMEPA1, CD14, SMAD6, TRIB1, DUSP6	39	1186	16792	3.63039	0.886798	0.0310046	0.0286056
GOTERM_BP_ALL	GO:1902531~regulation of intracellular signal transduction	12	29.2683	0.00107802	CCR1, NLRP12, HIP1, IL1B, PSD4, MYADM, S100A12, ARHGEF10L, TRIB1, S100A8, DUSP6, SLC9A1	39	1714	16792	3.01445	0.889475	0.0310046	0.0286056
GOTERM_BP_ALL	GO:0042990~regulation of transcription factor import into nucleus	4	9.7561	0.00116857	NLRP12, SMAD3, IL1B, SLC9A1	39	92	16792	18.7202	0.908151	0.033044	0.0304872
GOTERM_BP_ALL	GO:0042991~transcription factor import into nucleus	4	9.7561	0.00120564	NLRP12, SMAD3, IL1B, SLC9A1	39	93	16792	18.5189	0.914855	0.033044	0.0304872
GOTERM_BP_ALL	GO:0045862~positive regulation of proteolysis	6	14.6341	0.00120566	NLRP12, HIP1, SMAD3, IL1B, TRIB1, S100A8	39	358	16792	7.21616	0.914859	0.033044	0.0304872
GOTERM_BP_ALL	GO:1901700~response to oxygen-containing compound	11	26.8293	0.00121366	SCARB1, PTPRE, ACSL1, IL1B, IRF8, CD14, ATP6V0D1, TRIB1, S100A8, SLC9A1, IFNAR1	39	1466	16792	3.2307	0.916241	0.033044	0.0304872
GOTERM_BP_ALL	GO:0045936~negative regulation of phosphate metabolic process	7	17.0732	0.00128441	NLRP12, IL1B, MYADM, PMEPA1, SMAD6, TRIB1, DUSP6	39	544	16792	5.54035	0.927521	0.0330937	0.0305331
GOTERM_BP_ALL	GO:0010563~negative regulation of phosphorus metabolic process	7	17.0732	0.00128441	NLRP12, IL1B, MYADM, PMEPA1, SMAD6, TRIB1, DUSP6	39	544	16792	5.54035	0.927521	0.0330937	0.0305331
GOTERM_BP_ALL	GO:0009888~tissue development	12	29.2683	0.00131713	SRGN, ROBO2, CCR1, SMAD3, CPQ, IL1B, BMP2K, MYADM, SMAD6, DUSP6, SLC9A1, CTSB	39	1756	16792	2.94235	0.932211	0.0330937	0.0305331
GOTERM_BP_ALL	GO:0035556~intracellular signal transduction	15	36.5854	0.00132622	CCR1, RBM38, HIP1, ARHGEF10L, DUSP6, SLC9A1, NLRP12, IL1B, PSD4, MYADM, S100A12, CD14, TRIB1, S100A8, IFNAR1	39	2657	16792	2.43073	0.933459	0.0330937	0.0305331
GOTERM_BP_ALL	GO:0071702~organic substance transport	15	36.5854	0.00132622	SRGN, SCARB1, HIP1, SMAD3, ACSL1, LYST, SLC9A1, NLRP12, IL1B, MYADM, S100A12, CD14, ATP6V0D1, S100A8, IFNAR1	39	2657	16792	2.43073	0.933459	0.0330937	0.0305331
GOTERM_BP_ALL	GO:0032268~regulation of cellular protein metabolic process	14	34.1463	0.00133027	CCR1, HIP1, SMAD3, ACSL1, SMAD6, DUSP6, NLRP12, IL1B, MYADM, PMEPA1, S100A12, TRIB1, S100A8, IFNAR1	39	2346	16792	2.56944	0.934008	0.0330937	0.0305331
GOTERM_BP_ALL	GO:0032649~regulation of interferon-gamma production	4	9.7561	0.00136135	IL1B, IRF8, CD14, IFNAR1	39	97	16792	17.7552	0.938071	0.0330937	0.0305331
GOTERM_BP_ALL	GO:0050715~positive regulation of cytokine secretion	4	9.7561	0.00136135	NLRP12, IL1B, CD14, IFNAR1	39	97	16792	17.7552	0.938071	0.0330937	0.0305331
GOTERM_BP_ALL	GO:0042307~positive regulation of protein import into nucleus	4	9.7561	0.00136135	NLRP12, SMAD3, IL1B, SLC9A1	39	97	16792	17.7552	0.938071	0.0330937	0.0305331
GOTERM_BP_ALL	GO:0006935~chemotaxis	7	17.0732	0.00138419	ROBO2, CCR1, SMAD3, IL1B, S100A12, LYST, S100A8	39	552	16792	5.46005	0.940898	0.0331724	0.0306057
GOTERM_BP_ALL	GO:0042330~taxis	7	17.0732	0.00139707	ROBO2, CCR1, SMAD3, IL1B, S100A12, LYST, S100A8	39	553	16792	5.45018	0.942434	0.0331724	0.0306057
GOTERM_BP_ALL	GO:1904591~positive regulation of protein import	4	9.7561	0.00144372	NLRP12, SMAD3, IL1B, SLC9A1	39	99	16792	17.3965	0.947671	0.033886	0.0312641
GOTERM_BP_ALL	GO:0050900~leukocyte migration	6	14.6341	0.00149802	CCR1, NLRP12, IL1B, S100A12, LYST, S100A8	39	376	16792	6.8707	0.953171	0.034761	0.0320713
GOTERM_BP_ALL	GO:0006928~movement of cell or subcellular component	12	29.2683	0.00157728	ROBO2, CCR1, SCARB1, NLRP12, SMAD3, IL1B, MYADM, S100A12, TRIB1, LYST, S100A8, SLC9A1	39	1795	16792	2.87842	0.960179	0.0355549	0.0328039
GOTERM_BP_ALL	GO:0006952~defense response	11	26.8293	0.00158342	CCR1, NLRP12, SMAD3, IL1B, IRF8, S100A12, CD14, LYST, S100A8, CTSB, IFNAR1	39	1518	16792	3.12003	0.960676	0.0355549	0.0328039
GOTERM_BP_ALL	GO:0051049~regulation of transport	12	29.2683	0.00158448	SRGN, CCR1, SCARB1, NLRP12, HIP1, SMAD3, TTYH1, IL1B, CD14, S100A8, SLC9A1, IFNAR1	39	1796	16792	2.87682	0.96076	0.0355549	0.0328039
GOTERM_BP_ALL	GO:0032609~interferon-gamma production	4	9.7561	0.00161773	IL1B, IRF8, CD14, IFNAR1	39	103	16792	16.7209	0.963341	0.0359066	0.0331284
GOTERM_BP_ALL	GO:0001819~positive regulation of cytokine production	6	14.6341	0.00168151	NLRP12, SMAD3, IL1B, IRF8, CD14, IFNAR1	39	386	16792	6.69271	0.967824	0.0366403	0.0338052
GOTERM_BP_ALL	GO:0051241~negative regulation of multicellular organismal process	9	21.9512	0.00169027	SRGN, ROBO2, CCR1, ZHX2, NLRP12, SMAD3, IL1B, SMAD6, TRIB1	39	1017	16792	3.8103	0.968395	0.0366403	0.0338052
GOTERM_BP_ALL	GO:0009893~positive regulation of metabolic process	16	39.0244	0.00170462	CCR1, SCARB1, HIP1, SMAD3, ACSL1, ARHGEF10L, SMAD6, DUSP6, SLC9A1, NLRP12, IL1B, IRF8, S100A12, TRIB1, S100A8, IFNAR1	39	3052	16792	2.25722	0.969309	0.0366403	0.0338052
GOTERM_BP_ALL	GO:0001817~regulation of cytokine production	7	17.0732	0.00173477	SRGN, NLRP12, SMAD3, IL1B, IRF8, CD14, IFNAR1	39	577	16792	5.22348	0.971145	0.036842	0.0339913
GOTERM_BP_ALL	GO:0031400~negative regulation of protein modification process	7	17.0732	0.00175008	NLRP12, IL1B, MYADM, PMEPA1, SMAD6, TRIB1, DUSP6	39	578	16792	5.21444	0.972035	0.036842	0.0339913
GOTERM_BP_ALL	GO:0090287~regulation of cellular response to growth factor stimulus	5	12.1951	0.00189991	SMAD3, IL1B, PMEPA1, SMAD6, DUSP6	39	235	16792	9.16094	0.979417	0.0395879	0.0365248
GOTERM_BP_ALL	GO:0044087~regulation of cellular component biogenesis	8	19.5122	0.00197357	ROBO2, SMAD3, MYADM, IRF8, PMEPA1, ARHGEF10L, SMAD6, SLC9A1	39	807	16792	4.26829	0.982297	0.0407047	0.0375552
GOTERM_BP_ALL	GO:0031349~positive regulation of defense response	6	14.6341	0.00200888	NLRP12, IL1B, S100A12, CD14, S100A8, CTSB	39	402	16792	6.42633	0.983531	0.0407047	0.0375552
GOTERM_BP_ALL	GO:0012501~programmed cell death	12	29.2683	0.00203324	SRGN, ROBO2, NLRP12, HIP1, SMAD3, IL1B, CD14, SMAD6, S100A8, DUSP6, SLC9A1, CTSB	39	1852	16792	2.78983	0.984332	0.0407047	0.0375552
GOTERM_BP_ALL	GO:0006468~protein phosphorylation	12	29.2683	0.00203324	CCR1, NLRP12, ACSL1, IL1B, BMP2K, MYADM, PMEPA1, S100A12, SMAD6, TRIB1, DUSP6, IFNAR1	39	1852	16792	2.78983	0.984332	0.0407047	0.0375552
GOTERM_BP_ALL	GO:0032731~positive regulation of interleukin-1 beta production	3	7.31707	0.00208417	NLRP12, SMAD3, IFNAR1	39	30	16792	43.0564	0.985882	0.0409817	0.0378107
GOTERM_BP_ALL	GO:0015031~protein transport	12	29.2683	0.00210518	SRGN, NLRP12, HIP1, SMAD3, IL1B, MYADM, S100A12, CD14, ATP6V0D1, LYST, SLC9A1, IFNAR1	39	1860	16792	2.77783	0.986476	0.0409817	0.0378107
GOTERM_BP_ALL	GO:0002376~immune system process	14	34.1463	0.00210728	CCR1, SMAD3, SMAD6, LYST, NLRP12, IL1B, IRF8, S100A12, CD14, TRIB1, S100A8, LAIR1, CTSB, IFNAR1	39	2465	16792	2.44539	0.986534	0.0409817	0.0378107
GOTERM_BP_ALL	GO:0032879~regulation of localization	14	34.1463	0.00217095	CCR1, SRGN, SCARB1, HIP1, SMAD3, TTYH1, SLC9A1, NLRP12, IL1B, MYADM, CD14, TRIB1, S100A8, IFNAR1	39	2473	16792	2.43748	0.988179	0.0418214	0.0385855
GOTERM_BP_ALL	GO:0046824~positive regulation of nucleocytoplasmic transport	4	9.7561	0.00232829	NLRP12, SMAD3, IL1B, SLC9A1	39	117	16792	14.7201	0.991434	0.0440219	0.0406157
GOTERM_BP_ALL	GO:0050729~positive regulation of inflammatory response	4	9.7561	0.00232829	NLRP12, IL1B, S100A12, S100A8	39	117	16792	14.7201	0.991434	0.0440219	0.0406157
GOTERM_BP_ALL	GO:0060326~cell chemotaxis	5	12.1951	0.00241359	CCR1, IL1B, S100A12, LYST, S100A8	39	251	16792	8.57697	0.992806	0.045216	0.0417174
GOTERM_BP_ALL	GO:0043280~positive regulation of cysteine-type endopeptidase activity involved in apoptotic process	4	9.7561	0.00244321	NLRP12, HIP1, SMAD3, S100A8	39	119	16792	14.4727	0.993229	0.0453548	0.0418454
GOTERM_BP_ALL	GO:0051246~regulation of protein metabolic process	14	34.1463	0.0025049	CCR1, HIP1, SMAD3, ACSL1, SMAD6, DUSP6, NLRP12, IL1B, MYADM, PMEPA1, S100A12, TRIB1, S100A8, IFNAR1	39	2512	16792	2.39964	0.994032	0.0460812	0.0425156
GOTERM_BP_ALL	GO:0010604~positive regulation of macromolecule metabolic process	15	36.5854	0.00269311	CCR1, HIP1, SMAD3, ACSL1, ARHGEF10L, SMAD6, DUSP6, SLC9A1, NLRP12, IL1B, IRF8, S100A12, TRIB1, S100A8, IFNAR1	39	2856	16792	2.26137	0.995941	0.0491011	0.0453019
GOTERM_BP_ALL	GO:0009725~response to hormone	8	19.5122	0.00271854	ROBO2, PTPRE, ACSL1, IL1B, PMEPA1, ATP6V0D1, SLC9A1, CTSB	39	854	16792	4.03339	0.996147	0.0491262	0.0453251
GOTERM_BP_ALL	GO:0016310~phosphorylation	13	31.7073	0.00279573	CCR1, ACSL1, SMAD6, DUSP6, NLRP12, IL1B, BMP2K, MYADM, PMEPA1, S100A12, TK2, TRIB1, IFNAR1	39	2229	16792	2.51114	0.99671	0.0500779	0.0462032
GOTERM_BP_ALL	GO:0006954~inflammatory response	7	17.0732	0.00285198	CCR1, NLRP12, SMAD3, IL1B, S100A12, CD14, S100A8	39	637	16792	4.73147	0.997068	0.0506412	0.0467228
GOTERM_BP_ALL	GO:1900182~positive regulation of protein localization to nucleus	4	9.7561	0.00300371	NLRP12, SMAD3, IL1B, SLC9A1	39	128	16792	13.4551	0.997851	0.0524237	0.0483674
GOTERM_BP_ALL	GO:2001056~positive regulation of cysteine-type endopeptidase activity	4	9.7561	0.00300371	NLRP12, HIP1, SMAD3, S100A8	39	128	16792	13.4551	0.997851	0.0524237	0.0483674
GOTERM_BP_ALL	GO:0031399~regulation of protein modification process	11	26.8293	0.00314172	CCR1, NLRP12, ACSL1, IL1B, MYADM, PMEPA1, S100A12, SMAD6, TRIB1, DUSP6, IFNAR1	39	1664	16792	2.84628	0.99838	0.0539529	0.0497783
GOTERM_BP_ALL	GO:0032732~positive regulation of interleukin-1 production	3	7.31707	0.00315927	NLRP12, SMAD3, IFNAR1	39	37	16792	34.9106	0.998437	0.0539529	0.0497783
GOTERM_BP_ALL	GO:0008219~cell death	12	29.2683	0.00317059	SRGN, ROBO2, NLRP12, HIP1, SMAD3, IL1B, CD14, SMAD6, S100A8, DUSP6, SLC9A1, CTSB	39	1958	16792	2.6388	0.998473	0.0539529	0.0497783
GOTERM_BP_ALL	GO:0031214~biomineral tissue development	4	9.7561	0.00341789	SRGN, CCR1, SMAD3, BMP2K	39	134	16792	12.8527	0.99908	0.0576804	0.0532174
GOTERM_BP_ALL	GO:0006508~proteolysis	11	26.8293	0.00356459	SRGN, NLRP12, HIP1, SMAD3, CPQ, IL1B, USP3, TRIB1, LONRF1, S100A8, CTSB	39	1693	16792	2.79752	0.999319	0.059663	0.0550466
GOTERM_BP_ALL	GO:0051222~positive regulation of protein transport	6	14.6341	0.00359506	NLRP12, SMAD3, IL1B, CD14, SLC9A1, IFNAR1	39	460	16792	5.61605	0.99936	0.0596838	0.0550657
GOTERM_BP_ALL	GO:0048522~positive regulation of cellular process	20	48.7805	0.00367605	ROBO2, CCR1, RBM38, SCARB1, HIP1, SMAD3, ACSL1, ARHGEF10L, SMAD6, DUSP6, SLC9A1, NLRP12, IL1B, MYADM, IRF8, S100A12, CD14, TRIB1, S100A8, IFNAR1	39	4744	16792	1.81519	0.999458	0.0604751	0.0557958
GOTERM_BP_ALL	GO:0032270~positive regulation of cellular protein metabolic process	10	24.3902	0.00370195	CCR1, NLRP12, HIP1, SMAD3, ACSL1, IL1B, S100A12, TRIB1, S100A8, DUSP6	39	1420	16792	3.03214	0.999486	0.0604751	0.0557958
GOTERM_BP_ALL	GO:0022610~biological adhesion	11	26.8293	0.00375248	ROBO2, CCR1, SCARB1, SMAD3, TTYH1, IL1B, MYADM, SMAD6, S100A8, SLC9A1, IFNAR1	39	1705	16792	2.77783	0.999537	0.0608141	0.0561086
GOTERM_BP_ALL	GO:0009306~protein secretion	6	14.6341	0.00390444	SRGN, NLRP12, IL1B, S100A12, CD14, IFNAR1	39	469	16792	5.50828	0.999661	0.0621808	0.0573696
GOTERM_BP_ALL	GO:1901701~cellular response to oxygen-containing compound	8	19.5122	0.00391957	SCARB1, PTPRE, IL1B, IRF8, CD14, ATP6V0D1, TRIB1, SLC9A1	39	912	16792	3.77688	0.999671	0.0621808	0.0573696
GOTERM_BP_ALL	GO:0010950~positive regulation of endopeptidase activity	4	9.7561	0.0039434	NLRP12, HIP1, SMAD3, S100A8	39	141	16792	12.2146	0.999687	0.0621808	0.0573696
GOTERM_BP_ALL	GO:0051128~regulation of cellular component organization	13	31.7073	0.00395862	ROBO2, SCARB1, HIP1, SMAD3, ARHGEF10L, SMAD6, SLC9A1, IL1B, MYADM, IRF8, PMEPA1, CD14, S100A8	39	2323	16792	2.40953	0.999696	0.0621808	0.0573696
GOTERM_BP_ALL	GO:1902533~positive regulation of intracellular signal transduction	8	19.5122	0.00399122	CCR1, NLRP12, HIP1, IL1B, S100A12, S100A8, DUSP6, SLC9A1	39	915	16792	3.76449	0.999716	0.0622143	0.0574005
GOTERM_BP_ALL	GO:0045184~establishment of protein localization	12	29.2683	0.00406353	SRGN, NLRP12, HIP1, SMAD3, IL1B, MYADM, S100A12, CD14, ATP6V0D1, LYST, SLC9A1, IFNAR1	39	2021	16792	2.55654	0.999755	0.0628616	0.0579977
GOTERM_BP_ALL	GO:0006915~apoptotic process	11	26.8293	0.00447397	SRGN, ROBO2, NLRP12, HIP1, SMAD3, IL1B, CD14, SMAD6, S100A8, DUSP6, SLC9A1	39	1747	16792	2.71105	0.999894	0.0686905	0.0633756
GOTERM_BP_ALL	GO:0033364~mast cell secretory granule organization	2	4.87805	0.00452098	SRGN, LYST	39	2	16792	430.564	0.999904	0.0688943	0.0635636
GOTERM_BP_ALL	GO:0031589~cell-substrate adhesion	5	12.1951	0.0049006	SMAD3, TTYH1, MYADM, SMAD6, SLC9A1	39	306	16792	7.03536	0.999956	0.0741262	0.0683906
GOTERM_BP_ALL	GO:0010952~positive regulation of peptidase activity	4	9.7561	0.00513597	NLRP12, HIP1, SMAD3, S100A8	39	155	16792	11.1113	0.999973	0.0771151	0.0711484
GOTERM_BP_ALL	GO:0044765~single-organism transport	16	39.0244	0.0053137	CCR1, SRGN, SCARB1, SMAD3, ACSL1, TTYH1, SLC9A1, NLRP12, IL1B, MYADM, IRF8, S100A12, CD14, ATP6V0D1, S100A8, IFNAR1	39	3415	16792	2.01728	0.999981	0.0788405	0.0727402
GOTERM_BP_ALL	GO:0048518~positive regulation of biological process	21	51.2195	0.00536248	ROBO2, CCR1, RBM38, SCARB1, HIP1, SMAD3, ACSL1, ARHGEF10L, SMAD6, DUSP6, SLC9A1, NLRP12, IL1B, MYADM, IRF8, S100A12, CD14, TRIB1, S100A8, CTSB, IFNAR1	39	5285	16792	1.71085	0.999983	0.0788405	0.0727402
GOTERM_BP_ALL	GO:0050727~regulation of inflammatory response	5	12.1951	0.00536671	NLRP12, SMAD3, IL1B, S100A12, S100A8	39	314	16792	6.85612	0.999983	0.0788405	0.0727402
GOTERM_BP_ALL	GO:0097529~myeloid leukocyte migration	4	9.7561	0.00551239	CCR1, IL1B, S100A12, S100A8	39	159	16792	10.8318	0.999987	0.0791136	0.0729921
GOTERM_BP_ALL	GO:0071396~cellular response to lipid	6	14.6341	0.00551519	SCARB1, IL1B, IRF8, PMEPA1, CD14, TRIB1	39	509	16792	5.07541	0.999988	0.0791136	0.0729921
GOTERM_BP_ALL	GO:0051247~positive regulation of protein metabolic process	10	24.3902	0.00551529	CCR1, NLRP12, HIP1, SMAD3, ACSL1, IL1B, S100A12, TRIB1, S100A8, DUSP6	39	1508	16792	2.8552	0.999988	0.0791136	0.0729921
GOTERM_BP_ALL	GO:0006796~phosphate-containing compound metabolic process	15	36.5854	0.00554027	CCR1, SMAD3, ACSL1, SMAD6, DUSP6, PTPRE, NLRP12, IL1B, BMP2K, MYADM, PMEPA1, S100A12, TK2, TRIB1, IFNAR1	39	3083	16792	2.09486	0.999988	0.0791136	0.0729921
GOTERM_BP_ALL	GO:0006793~phosphorus metabolic process	15	36.5854	0.0056405	CCR1, SMAD3, ACSL1, SMAD6, DUSP6, PTPRE, NLRP12, IL1B, BMP2K, MYADM, PMEPA1, S100A12, TK2, TRIB1, IFNAR1	39	3089	16792	2.09079	0.99999	0.0799854	0.0737965
GOTERM_BP_ALL	GO:0032651~regulation of interleukin-1 beta production	3	7.31707	0.00570451	NLRP12, SMAD3, IFNAR1	39	50	16792	25.8338	0.999992	0.0803352	0.0741193
GOTERM_BP_ALL	GO:1904951~positive regulation of establishment of protein localization	6	14.6341	0.00588664	NLRP12, SMAD3, IL1B, CD14, SLC9A1, IFNAR1	39	517	16792	4.99688	0.999994	0.0823323	0.0759618
GOTERM_BP_ALL	GO:0051223~regulation of protein transport	7	17.0732	0.00616849	SRGN, NLRP12, SMAD3, IL1B, CD14, SLC9A1, IFNAR1	39	746	16792	4.04015	0.999997	0.0855273	0.0789096
GOTERM_BP_ALL	GO:0032269~negative regulation of cellular protein metabolic process	8	19.5122	0.00619884	NLRP12, SMAD3, IL1B, MYADM, PMEPA1, SMAD6, TRIB1, DUSP6	39	992	16792	3.47229	0.999997	0.0855273	0.0789096
GOTERM_BP_ALL	GO:0009719~response to endogenous stimulus	10	24.3902	0.00654173	ROBO2, PTPRE, SMAD3, ACSL1, IL1B, PMEPA1, ATP6V0D1, SMAD6, SLC9A1, CTSB	39	1548	16792	2.78142	0.999998	0.0896524	0.0827155
GOTERM_BP_ALL	GO:0042306~regulation of protein import into nucleus	4	9.7561	0.00684878	NLRP12, SMAD3, IL1B, SLC9A1	39	172	16792	10.0131	0.999999	0.0932156	0.086003
GOTERM_BP_ALL	GO:0033036~macromolecule localization	14	34.1463	0.00690314	SRGN, SCARB1, HIP1, SMAD3, ACSL1, LYST, SLC9A1, NLRP12, IL1B, MYADM, S100A12, CD14, ATP6V0D1, IFNAR1	39	2817	16792	2.13983	0.999999	0.0932156	0.086003
GOTERM_BP_ALL	GO:0080090~regulation of primary metabolic process	22	53.6585	0.00693867	CCR1, RBM38, SCARB1, ZHX2, HIP1, SMAD3, ACSL1, USP3, ARHGEF10L, SMAD6, DUSP6, SLC9A1, PHF20L1, NLRP12, IL1B, MYADM, IRF8, PMEPA1, S100A12, TRIB1, S100A8, IFNAR1	39	5798	16792	1.63374	0.999999	0.0932156	0.086003
GOTERM_BP_ALL	GO:1904589~regulation of protein import	4	9.7561	0.00718218	NLRP12, SMAD3, IL1B, SLC9A1	39	175	16792	9.84147	1	0.0958562	0.0884393
GOTERM_BP_ALL	GO:0050789~regulation of biological process	33	80.4878	0.00765815	ROBO2, SCARB1, HIP1, TTYH1, ARHGEF10L, SLC9A1, PSD4, S100A12, PMEPA1, CD14, LAIR1, CTSB, CCR1, SRGN, RBM38, ZHX2, SMAD3, ACSL1, USP3, SMAD6, DUSP6, PHF20L1, PTPRE, NLRP12, IL1B, MYADM, BMP2K, IRF8, RIN3, ATP6V0D1, TRIB1, S100A8, IFNAR1	39	10922	16792	1.30092	1	0.100622	0.0928367
GOTERM_BP_ALL	GO:0031323~regulation of cellular metabolic process	22	53.6585	0.00768336	CCR1, RBM38, SCARB1, ZHX2, HIP1, SMAD3, ACSL1, USP3, ARHGEF10L, SMAD6, DUSP6, SLC9A1, PHF20L1, NLRP12, IL1B, MYADM, IRF8, PMEPA1, S100A12, TRIB1, S100A8, IFNAR1	39	5844	16792	1.62088	1	0.100622	0.0928367
GOTERM_BP_ALL	GO:0065008~regulation of biological quality	16	39.0244	0.00768712	ROBO2, CCR1, SRGN, RBM38, SCARB1, HIP1, SMAD3, CPQ, USP3, SLC9A1, NLRP12, IL1B, MYADM, S100A12, ATP6V0D1, S100A8	39	3548	16792	1.94166	1	0.100622	0.0928367
GOTERM_BP_ALL	GO:0006810~transport	19	46.3415	0.00777782	CCR1, SRGN, SCARB1, HIP1, SMAD3, ACSL1, TTYH1, LYST, SLC9A1, NLRP12, IL1B, MYADM, IRF8, S100A12, RIN3, CD14, ATP6V0D1, S100A8, IFNAR1	39	4663	16792	1.75439	1	0.101161	0.0933338
GOTERM_BP_ALL	GO:0019538~protein metabolic process	21	51.2195	0.00797766	CCR1, SRGN, HIP1, SMAD3, ACSL1, CPQ, USP3, SMAD6, DUSP6, PTPRE, NLRP12, IL1B, BMP2K, MYADM, PMEPA1, S100A12, TRIB1, LONRF1, S100A8, CTSB, IFNAR1	39	5457	16792	1.65693	1	0.103104	0.0951261
GOTERM_BP_ALL	GO:0051047~positive regulation of secretion	5	12.1951	0.00822671	NLRP12, IL1B, CD14, S100A8, IFNAR1	39	355	16792	6.06428	1	0.105654	0.0974788
GOTERM_BP_ALL	GO:0051248~negative regulation of protein metabolic process	8	19.5122	0.00835127	NLRP12, SMAD3, IL1B, MYADM, PMEPA1, SMAD6, TRIB1, DUSP6	39	1049	16792	3.28362	1	0.106583	0.0983362
GOTERM_BP_ALL	GO:0001503~ossification	5	12.1951	0.00855029	SRGN, CCR1, SMAD3, BMP2K, SMAD6	39	359	16792	5.99671	1	0.108445	0.100054
GOTERM_BP_ALL	GO:0034097~response to cytokine	7	17.0732	0.00869525	CCR1, NLRP12, ACSL1, IL1B, IRF8, CD14, IFNAR1	39	802	16792	3.75804	1	0.109463	0.100993
GOTERM_BP_ALL	GO:0032869~cellular response to insulin stimulus	4	9.7561	0.00873772	PTPRE, IL1B, ATP6V0D1, SLC9A1	39	188	16792	9.16094	1	0.109463	0.100993
GOTERM_BP_ALL	GO:0032652~regulation of interleukin-1 production	3	7.31707	0.00892828	NLRP12, SMAD3, IFNAR1	39	63	16792	20.5031	1	0.110579	0.102023
GOTERM_BP_ALL	GO:0043065~positive regulation of apoptotic process	6	14.6341	0.00893513	NLRP12, HIP1, SMAD3, S100A8, DUSP6, SLC9A1	39	572	16792	4.51641	1	0.110579	0.102023
GOTERM_BP_ALL	GO:0010468~regulation of gene expression	18	43.9024	0.00902243	CCR1, RBM38, ZHX2, HIP1, SMAD3, USP3, ARHGEF10L, SMAD6, SLC9A1, PHF20L1, NLRP12, IL1B, MYADM, IRF8, S100A12, TRIB1, S100A8, IFNAR1	39	4345	16792	1.78369	1	0.110976	0.102389
GOTERM_BP_ALL	GO:0065007~biological regulation	34	82.9268	0.00907589	ROBO2, SCARB1, HIP1, TTYH1, CPQ, ARHGEF10L, SLC9A1, PSD4, S100A12, PMEPA1, CD14, LAIR1, CTSB, CCR1, SRGN, RBM38, ZHX2, SMAD3, ACSL1, USP3, SMAD6, DUSP6, PHF20L1, PTPRE, NLRP12, IL1B, MYADM, BMP2K, IRF8, RIN3, ATP6V0D1, TRIB1, S100A8, IFNAR1	39	11548	16792	1.26768	1	0.110976	0.102389
GOTERM_BP_ALL	GO:1902578~single-organism localization	16	39.0244	0.0091551	CCR1, SRGN, SCARB1, SMAD3, ACSL1, TTYH1, SLC9A1, NLRP12, IL1B, MYADM, IRF8, S100A12, CD14, ATP6V0D1, S100A8, IFNAR1	39	3614	16792	1.90621	1	0.111278	0.102668
GOTERM_BP_ALL	GO:0043068~positive regulation of programmed cell death	6	14.6341	0.00925789	NLRP12, HIP1, SMAD3, S100A8, DUSP6, SLC9A1	39	577	16792	4.47727	1	0.111862	0.103206
GOTERM_BP_ALL	GO:0070201~regulation of establishment of protein localization	7	17.0732	0.00964717	SRGN, NLRP12, SMAD3, IL1B, CD14, SLC9A1, IFNAR1	39	820	16792	3.67555	1	0.115305	0.106383
GOTERM_BP_ALL	GO:0097190~apoptotic signaling pathway	6	14.6341	0.00965582	SRGN, HIP1, SMAD3, IL1B, CD14, S100A8	39	583	16792	4.43119	1	0.115305	0.106383
GOTERM_BP_ALL	GO:0051090~regulation of sequence-specific DNA binding transcription factor activity	5	12.1951	0.00974859	NLRP12, IL1B, S100A12, TRIB1, S100A8	39	373	16792	5.77164	1	0.115736	0.106781
GOTERM_BP_ALL	GO:1903845~negative regulation of cellular response to transforming growth factor beta stimulus	3	7.31707	0.0100506	SMAD3, PMEPA1, SMAD6	39	67	16792	19.279	1	0.11795	0.108823
GOTERM_BP_ALL	GO:0030512~negative regulation of transforming growth factor beta receptor signaling pathway	3	7.31707	0.0100506	SMAD3, PMEPA1, SMAD6	39	67	16792	19.279	1	0.11795	0.108823
GOTERM_BP_ALL	GO:0043281~regulation of cysteine-type endopeptidase activity involved in apoptotic process	4	9.7561	0.0103366	NLRP12, HIP1, SMAD3, S100A8	39	200	16792	8.61128	1	0.120613	0.11128
GOTERM_BP_ALL	GO:0051234~establishment of localization	19	46.3415	0.0104561	CCR1, SRGN, SCARB1, HIP1, SMAD3, ACSL1, TTYH1, LYST, SLC9A1, NLRP12, IL1B, MYADM, IRF8, S100A12, RIN3, CD14, ATP6V0D1, S100A8, IFNAR1	39	4790	16792	1.70787	1	0.120637	0.111303
GOTERM_BP_ALL	GO:0045087~innate immune response	7	17.0732	0.0105546	IRF8, S100A12, CD14, LYST, S100A8, CTSB, IFNAR1	39	836	16792	3.6052	1	0.120637	0.111303
GOTERM_BP_ALL	GO:0046903~secretion	8	19.5122	0.0106106	SRGN, CCR1, NLRP12, IL1B, S100A12, CD14, S100A8, IFNAR1	39	1098	16792	3.13708	1	0.120637	0.111303
GOTERM_BP_ALL	GO:0030100~regulation of endocytosis	4	9.7561	0.0106185	SCARB1, HIP1, IL1B, CD14	39	202	16792	8.52602	1	0.120637	0.111303
GOTERM_BP_ALL	GO:0051492~regulation of stress fiber assembly	3	7.31707	0.0106341	SMAD3, ARHGEF10L, SLC9A1	39	69	16792	18.7202	1	0.120637	0.111303
GOTERM_BP_ALL	GO:0010991~negative regulation of SMAD protein complex assembly	2	4.87805	0.0112652	PMEPA1, SMAD6	39	5	16792	172.226	1	0.127091	0.117257
GOTERM_BP_ALL	GO:0010942~positive regulation of cell death	6	14.6341	0.0113666	NLRP12, HIP1, SMAD3, S100A8, DUSP6, SLC9A1	39	607	16792	4.25599	1	0.127531	0.117663
GOTERM_BP_ALL	GO:0050708~regulation of protein secretion	5	12.1951	0.0115435	SRGN, NLRP12, IL1B, CD14, IFNAR1	39	392	16792	5.49189	1	0.128373	0.11844
GOTERM_BP_ALL	GO:0043170~macromolecule metabolic process	29	70.7317	0.011572	SCARB1, HIP1, CPQ, ARHGEF10L, SLC9A1, S100A12, PMEPA1, TK2, LONRF1, CTSB, CCR1, SRGN, RBM38, ZHX2, SMAD3, ACSL1, USP3, SMAD6, DUSP6, PHF20L1, PTPRE, NLRP12, IL1B, MYADM, BMP2K, IRF8, TRIB1, S100A8, IFNAR1	39	9130	16792	1.36762	1	0.128373	0.11844
GOTERM_BP_ALL	GO:0010605~negative regulation of macromolecule metabolic process	12	29.2683	0.0116922	CCR1, ZHX2, NLRP12, SMAD3, IL1B, USP3, MYADM, IRF8, PMEPA1, SMAD6, TRIB1, DUSP6	39	2326	16792	2.22131	1	0.128373	0.11844
GOTERM_BP_ALL	GO:0042981~regulation of apoptotic process	9	21.9512	0.0116932	NLRP12, HIP1, SMAD3, IL1B, SMAD6, S100A8, DUSP6, SLC9A1, CTSB	39	1400	16792	2.76791	1	0.128373	0.11844
GOTERM_BP_ALL	GO:0007155~cell adhesion	10	24.3902	0.0118205	ROBO2, CCR1, SMAD3, TTYH1, IL1B, MYADM, SMAD6, S100A8, SLC9A1, IFNAR1	39	1699	16792	2.53422	1	0.129077	0.11909
GOTERM_BP_ALL	GO:0043067~regulation of programmed cell death	9	21.9512	0.0123252	NLRP12, HIP1, SMAD3, IL1B, SMAD6, S100A8, DUSP6, SLC9A1, CTSB	39	1413	16792	2.74245	1	0.133311	0.122996
GOTERM_BP_ALL	GO:0046822~regulation of nucleocytoplasmic transport	4	9.7561	0.0124041	NLRP12, SMAD3, IL1B, SLC9A1	39	214	16792	8.04793	1	0.133311	0.122996
GOTERM_BP_ALL	GO:0050714~positive regulation of protein secretion	4	9.7561	0.0124041	NLRP12, IL1B, CD14, IFNAR1	39	214	16792	8.04793	1	0.133311	0.122996
GOTERM_BP_ALL	GO:0048584~positive regulation of response to stimulus	11	26.8293	0.0127016	CCR1, NLRP12, HIP1, SMAD3, IL1B, S100A12, CD14, S100A8, DUSP6, SLC9A1, CTSB	39	2030	16792	2.33311	1	0.135794	0.125287
GOTERM_BP_ALL	GO:2000026~regulation of multicellular organismal development	10	24.3902	0.0128028	SRGN, ROBO2, CCR1, ZHX2, SMAD3, IL1B, BMP2K, MYADM, TRIB1, DUSP6	39	1721	16792	2.50183	1	0.136163	0.125628
GOTERM_BP_ALL	GO:1900180~regulation of protein localization to nucleus	4	9.7561	0.0130354	NLRP12, SMAD3, IL1B, SLC9A1	39	218	16792	7.90026	1	0.137739	0.127081
GOTERM_BP_ALL	GO:0009967~positive regulation of signal transduction	9	21.9512	0.0130859	CCR1, NLRP12, HIP1, SMAD3, IL1B, S100A12, S100A8, DUSP6, SLC9A1	39	1428	16792	2.71364	1	0.137739	0.127081
GOTERM_BP_ALL	GO:0051252~regulation of RNA metabolic process	16	39.0244	0.0132895	RBM38, ZHX2, HIP1, SMAD3, USP3, ARHGEF10L, SMAD6, SLC9A1, PHF20L1, NLRP12, IL1B, IRF8, S100A12, TRIB1, S100A8, IFNAR1	39	3762	16792	1.83121	1	0.139156	0.128389
GOTERM_BP_ALL	GO:0044267~cellular protein metabolic process	19	46.3415	0.0133568	CCR1, HIP1, SMAD3, ACSL1, USP3, SMAD6, DUSP6, PTPRE, NLRP12, IL1B, BMP2K, MYADM, PMEPA1, S100A12, TRIB1, LONRF1, S100A8, CTSB, IFNAR1	39	4900	16792	1.66953	1	0.139156	0.128389
GOTERM_BP_ALL	GO:0010990~regulation of SMAD protein complex assembly	2	4.87805	0.0135033	PMEPA1, SMAD6	39	6	16792	143.521	1	0.139968	0.129138
GOTERM_BP_ALL	GO:2000116~regulation of cysteine-type endopeptidase activity	4	9.7561	0.0140164	NLRP12, HIP1, SMAD3, S100A8	39	224	16792	7.68864	1	0.144553	0.133369
GOTERM_BP_ALL	GO:0032231~regulation of actin filament bundle assembly	3	7.31707	0.0141024	SMAD3, ARHGEF10L, SLC9A1	39	80	16792	16.1462	1	0.144709	0.133512
GOTERM_BP_ALL	GO:0051493~regulation of cytoskeleton organization	5	12.1951	0.0147915	SMAD3, MYADM, ARHGEF10L, S100A8, SLC9A1	39	422	16792	5.10147	1	0.151021	0.139336
GOTERM_BP_ALL	GO:0019222~regulation of metabolic process	22	53.6585	0.0151986	CCR1, RBM38, SCARB1, ZHX2, HIP1, SMAD3, ACSL1, USP3, ARHGEF10L, SMAD6, DUSP6, SLC9A1, PHF20L1, NLRP12, IL1B, MYADM, IRF8, PMEPA1, S100A12, TRIB1, S100A8, IFNAR1	39	6171	16792	1.53499	1	0.152908	0.141077
GOTERM_BP_ALL	GO:0036211~protein modification process	16	39.0244	0.0152009	CCR1, ACSL1, USP3, SMAD6, DUSP6, PTPRE, NLRP12, IL1B, BMP2K, MYADM, PMEPA1, S100A12, TRIB1, LONRF1, S100A8, IFNAR1	39	3818	16792	1.80435	1	0.152908	0.141077
GOTERM_BP_ALL	GO:0006464~cellular protein modification process	16	39.0244	0.0152009	CCR1, ACSL1, USP3, SMAD6, DUSP6, PTPRE, NLRP12, IL1B, BMP2K, MYADM, PMEPA1, S100A12, TRIB1, LONRF1, S100A8, IFNAR1	39	3818	16792	1.80435	1	0.152908	0.141077
GOTERM_BP_ALL	GO:0030593~neutrophil chemotaxis	3	7.31707	0.0154694	IL1B, S100A12, S100A8	39	84	16792	15.3773	1	0.154846	0.142865
GOTERM_BP_ALL	GO:0051130~positive regulation of cellular component organization	8	19.5122	0.0155569	ROBO2, HIP1, SMAD3, IL1B, MYADM, IRF8, ARHGEF10L, CD14	39	1183	16792	2.91168	1	0.154962	0.142972
GOTERM_BP_ALL	GO:0051345~positive regulation of hydrolase activity	7	17.0732	0.0161087	NLRP12, HIP1, SMAD3, PSD4, RIN3, ARHGEF10L, S100A8	39	917	16792	3.28675	1	0.15968	0.147325
GOTERM_BP_ALL	GO:0006897~endocytosis	6	14.6341	0.0163391	SCARB1, HIP1, IL1B, IRF8, RIN3, CD14	39	665	16792	3.88479	1	0.161181	0.148709
GOTERM_BP_ALL	GO:0008104~protein localization	12	29.2683	0.0168404	SRGN, NLRP12, HIP1, SMAD3, IL1B, MYADM, S100A12, CD14, ATP6V0D1, LYST, SLC9A1, IFNAR1	39	2448	16792	2.11061	1	0.165299	0.152509
GOTERM_BP_ALL	GO:0060255~regulation of macromolecule metabolic process	21	51.2195	0.0169741	CCR1, RBM38, ZHX2, HIP1, SMAD3, ACSL1, USP3, ARHGEF10L, SMAD6, DUSP6, SLC9A1, PHF20L1, NLRP12, IL1B, MYADM, IRF8, PMEPA1, S100A12, TRIB1, S100A8, IFNAR1	39	5815	16792	1.55492	1	0.165299	0.152509
GOTERM_BP_ALL	GO:0048519~negative regulation of biological process	18	43.9024	0.0169994	ROBO2, CCR1, SRGN, RBM38, ZHX2, SMAD3, USP3, SMAD6, DUSP6, SLC9A1, PTPRE, NLRP12, IL1B, MYADM, IRF8, PMEPA1, CD14, TRIB1	39	4623	16792	1.67643	1	0.165299	0.152509
GOTERM_BP_ALL	GO:0050793~regulation of developmental process	11	26.8293	0.0174006	SRGN, RBM38, ROBO2, CCR1, ZHX2, SMAD3, IL1B, BMP2K, MYADM, TRIB1, DUSP6	39	2129	16792	2.22461	1	0.168192	0.155179
GOTERM_BP_ALL	GO:0032868~response to insulin	4	9.7561	0.0175853	PTPRE, IL1B, ATP6V0D1, SLC9A1	39	244	16792	7.05843	1	0.168192	0.155179
GOTERM_BP_ALL	GO:0030282~bone mineralization	3	7.31707	0.0176224	SRGN, CCR1, SMAD3	39	90	16792	14.3521	1	0.168192	0.155179
GOTERM_BP_ALL	GO:0043408~regulation of MAPK cascade	6	14.6341	0.0176264	CCR1, NLRP12, IL1B, S100A12, TRIB1, DUSP6	39	678	16792	3.8103	1	0.168192	0.155179
GOTERM_BP_ALL	GO:0010941~regulation of cell death	9	21.9512	0.017813	NLRP12, HIP1, SMAD3, IL1B, SMAD6, S100A8, DUSP6, SLC9A1, CTSB	39	1509	16792	2.56798	1	0.169182	0.156091
GOTERM_BP_ALL	GO:0051046~regulation of secretion	6	14.6341	0.0181392	SRGN, NLRP12, IL1B, CD14, S100A8, IFNAR1	39	683	16792	3.78241	1	0.171482	0.158214
GOTERM_BP_ALL	GO:1990266~neutrophil migration	3	7.31707	0.0191245	IL1B, S100A12, S100A8	39	94	16792	13.7414	1	0.179964	0.166039
GOTERM_BP_ALL	GO:0007167~enzyme linked receptor protein signaling pathway	7	17.0732	0.0192263	PTPRE, HIP1, SMAD3, IL1B, PMEPA1, ATP6V0D1, SMAD6	39	954	16792	3.15928	1	0.180092	0.166157
GOTERM_BP_ALL	GO:0048523~negative regulation of cellular process	17	41.4634	0.0193758	ROBO2, SRGN, RBM38, ZHX2, SMAD3, USP3, SMAD6, DUSP6, SLC9A1, PTPRE, NLRP12, IL1B, MYADM, IRF8, PMEPA1, CD14, TRIB1	39	4300	16792	1.70223	1	0.180664	0.166685
GOTERM_BP_ALL	GO:0090316~positive regulation of intracellular protein transport	4	9.7561	0.0199493	NLRP12, SMAD3, IL1B, SLC9A1	39	256	16792	6.72756	1	0.18435	0.170086
GOTERM_BP_ALL	GO:0032880~regulation of protein localization	7	17.0732	0.0199517	SRGN, NLRP12, SMAD3, IL1B, CD14, SLC9A1, IFNAR1	39	962	16792	3.133	1	0.18435	0.170086
GOTERM_BP_ALL	GO:0007249~I-kappaB kinase/NF-kappaB signaling	4	9.7561	0.0201539	NLRP12, IL1B, S100A12, CD14	39	257	16792	6.70139	1	0.184428	0.170157
GOTERM_BP_ALL	GO:0045595~regulation of cell differentiation	9	21.9512	0.0202024	RBM38, ROBO2, CCR1, ZHX2, SMAD3, IL1B, MYADM, TRIB1, DUSP6	39	1544	16792	2.50976	1	0.184428	0.170157
GOTERM_BP_ALL	GO:0001657~ureteric bud development	3	7.31707	0.0202853	ROBO2, SMAD3, SMAD6	39	97	16792	13.3164	1	0.184428	0.170157
GOTERM_BP_ALL	GO:0032940~secretion by cell	7	17.0732	0.0203214	SRGN, CCR1, NLRP12, IL1B, S100A12, CD14, IFNAR1	39	966	16792	3.12003	1	0.184428	0.170157
GOTERM_BP_ALL	GO:0071345~cellular response to cytokine stimulus	6	14.6341	0.0206264	CCR1, NLRP12, ACSL1, IL1B, IRF8, IFNAR1	39	706	16792	3.65919	1	0.184766	0.170469
GOTERM_BP_ALL	GO:0072164~mesonephric tubule development	3	7.31707	0.0206787	ROBO2, SMAD3, SMAD6	39	98	16792	13.1805	1	0.184766	0.170469
GOTERM_BP_ALL	GO:0072163~mesonephric epithelium development	3	7.31707	0.0206787	ROBO2, SMAD3, SMAD6	39	98	16792	13.1805	1	0.184766	0.170469
GOTERM_BP_ALL	GO:0009892~negative regulation of metabolic process	12	29.2683	0.0207205	CCR1, ZHX2, NLRP12, SMAD3, IL1B, USP3, MYADM, IRF8, PMEPA1, SMAD6, TRIB1, DUSP6	39	2522	16792	2.04868	1	0.184766	0.170469
GOTERM_BP_ALL	GO:0030162~regulation of proteolysis	6	14.6341	0.0208528	NLRP12, HIP1, SMAD3, IL1B, TRIB1, S100A8	39	708	16792	3.64885	1	0.185136	0.170812
GOTERM_BP_ALL	GO:0010647~positive regulation of cell communication	9	21.9512	0.0209994	CCR1, NLRP12, HIP1, SMAD3, IL1B, S100A12, S100A8, DUSP6, SLC9A1	39	1555	16792	2.49201	1	0.185631	0.171268
GOTERM_BP_ALL	GO:1903844~regulation of cellular response to transforming growth factor beta stimulus	3	7.31707	0.0214751	SMAD3, PMEPA1, SMAD6	39	100	16792	12.9169	1	0.188197	0.173635
GOTERM_BP_ALL	GO:0017015~regulation of transforming growth factor beta receptor signaling pathway	3	7.31707	0.0214751	SMAD3, PMEPA1, SMAD6	39	100	16792	12.9169	1	0.188197	0.173635
GOTERM_BP_ALL	GO:0023056~positive regulation of signaling	9	21.9512	0.0215932	CCR1, NLRP12, HIP1, SMAD3, IL1B, S100A12, S100A8, DUSP6, SLC9A1	39	1563	16792	2.47926	1	0.188197	0.173635
GOTERM_BP_ALL	GO:0006355~regulation of transcription, DNA-templated	15	36.5854	0.0217195	ZHX2, HIP1, SMAD3, USP3, ARHGEF10L, SMAD6, SLC9A1, PHF20L1, NLRP12, IL1B, IRF8, S100A12, TRIB1, S100A8, IFNAR1	39	3603	16792	1.79252	1	0.188197	0.173635
GOTERM_BP_ALL	GO:0044707~single-multicellular organism process	21	51.2195	0.0217505	ROBO2, CCR1, SRGN, SCARB1, ZHX2, SMAD3, SMAD6, DUSP6, SLC9A1, NLRP12, IL1B, BMP2K, MYADM, IRF8, S100A12, CD14, TRIB1, ATP6V0D1, S100A8, CTSB, IFNAR1	39	5943	16792	1.52143	1	0.188197	0.173635
GOTERM_BP_ALL	GO:0071900~regulation of protein serine/threonine kinase activity	5	12.1951	0.0219946	ACSL1, IL1B, S100A12, TRIB1, DUSP6	39	476	16792	4.52273	1	0.189165	0.174528
GOTERM_BP_ALL	GO:0042742~defense response to bacterium	4	9.7561	0.0220476	IRF8, S100A12, LYST, S100A8	39	266	16792	6.47465	1	0.189165	0.174528
GOTERM_BP_ALL	GO:0032102~negative regulation of response to external stimulus	4	9.7561	0.0222639	ROBO2, NLRP12, SMAD3, TRIB1	39	267	16792	6.4504	1	0.190221	0.175503
GOTERM_BP_ALL	GO:0048869~cellular developmental process	16	39.0244	0.0225804	ROBO2, CCR1, RBM38, ZHX2, HIP1, SMAD3, SMAD6, DUSP6, SLC9A1, IL1B, MYADM, IRF8, TRIB1, ATP6V0D1, S100A8, CTSB	39	3992	16792	1.72571	1	0.190398	0.175666
GOTERM_BP_ALL	GO:0071621~granulocyte chemotaxis	3	7.31707	0.0226934	IL1B, S100A12, S100A8	39	103	16792	12.5407	1	0.190398	0.175666
GOTERM_BP_ALL	GO:0001823~mesonephros development	3	7.31707	0.0226934	ROBO2, SMAD3, SMAD6	39	103	16792	12.5407	1	0.190398	0.175666
GOTERM_BP_ALL	GO:0042089~cytokine biosynthetic process	3	7.31707	0.0226934	NLRP12, IL1B, IFNAR1	39	103	16792	12.5407	1	0.190398	0.175666
GOTERM_BP_ALL	GO:1903506~regulation of nucleic acid-templated transcription	15	36.5854	0.0228385	ZHX2, HIP1, SMAD3, USP3, ARHGEF10L, SMAD6, SLC9A1, PHF20L1, NLRP12, IL1B, IRF8, S100A12, TRIB1, S100A8, IFNAR1	39	3625	16792	1.78164	1	0.190398	0.175666
GOTERM_BP_ALL	GO:0016337~single organismal cell-cell adhesion	6	14.6341	0.022844	SMAD3, TTYH1, IL1B, MYADM, S100A8, IFNAR1	39	725	16792	3.56329	1	0.190398	0.175666
GOTERM_BP_ALL	GO:0080134~regulation of response to stress	8	19.5122	0.0234737	NLRP12, SMAD3, IL1B, S100A12, CD14, S100A8, CTSB, IFNAR1	39	1285	16792	2.68055	1	0.194455	0.179409
GOTERM_BP_ALL	GO:0042107~cytokine metabolic process	3	7.31707	0.0235212	NLRP12, IL1B, IFNAR1	39	105	16792	12.3018	1	0.194455	0.179409
GOTERM_BP_ALL	GO:2001141~regulation of RNA biosynthetic process	15	36.5854	0.0238407	ZHX2, HIP1, SMAD3, USP3, ARHGEF10L, SMAD6, SLC9A1, PHF20L1, NLRP12, IL1B, IRF8, S100A12, TRIB1, S100A8, IFNAR1	39	3644	16792	1.77235	1	0.19554	0.18041
GOTERM_BP_ALL	GO:0090101~negative regulation of transmembrane receptor protein serine/threonine kinase signaling pathway	3	7.31707	0.0239398	SMAD3, PMEPA1, SMAD6	39	106	16792	12.1858	1	0.19554	0.18041
GOTERM_BP_ALL	GO:0050709~negative regulation of protein secretion	3	7.31707	0.0239398	SRGN, NLRP12, IL1B	39	106	16792	12.1858	1	0.19554	0.18041
GOTERM_BP_ALL	GO:0051171~regulation of nitrogen compound metabolic process	17	41.4634	0.0241583	RBM38, SCARB1, ZHX2, HIP1, SMAD3, USP3, ARHGEF10L, SMAD6, SLC9A1, PHF20L1, NLRP12, IL1B, IRF8, S100A12, TRIB1, S100A8, IFNAR1	39	4404	16792	1.66203	1	0.196539	0.181332
GOTERM_BP_ALL	GO:0030154~cell differentiation	15	36.5854	0.0242727	ROBO2, CCR1, RBM38, ZHX2, HIP1, SMAD3, SMAD6, DUSP6, SLC9A1, IL1B, MYADM, IRF8, TRIB1, S100A8, CTSB	39	3652	16792	1.76847	1	0.196686	0.181467
GOTERM_BP_ALL	GO:0006909~phagocytosis	4	9.7561	0.024491	SCARB1, IL1B, IRF8, CD14	39	277	16792	6.21753	1	0.19767	0.182375
GOTERM_BP_ALL	GO:0098542~defense response to other organism	5	12.1951	0.024802	IRF8, S100A12, LYST, S100A8, IFNAR1	39	494	16792	4.35794	1	0.199392	0.183964
GOTERM_BP_ALL	GO:0006606~protein import into nucleus	4	9.7561	0.0251819	NLRP12, SMAD3, IL1B, SLC9A1	39	280	16792	6.15092	1	0.200865	0.185323
GOTERM_BP_ALL	GO:0044744~protein targeting to nucleus	4	9.7561	0.0251819	NLRP12, SMAD3, IL1B, SLC9A1	39	280	16792	6.15092	1	0.200865	0.185323
GOTERM_BP_ALL	GO:1902593~single-organism nuclear import	4	9.7561	0.0254146	NLRP12, SMAD3, IL1B, SLC9A1	39	281	16792	6.12903	1	0.201932	0.186308
GOTERM_BP_ALL	GO:0043412~macromolecule modification	16	39.0244	0.02641	CCR1, ACSL1, USP3, SMAD6, DUSP6, PTPRE, NLRP12, IL1B, BMP2K, MYADM, PMEPA1, S100A12, TRIB1, LONRF1, S100A8, IFNAR1	39	4065	16792	1.69472	1	0.209028	0.192854
GOTERM_BP_ALL	GO:0060394~negative regulation of pathway-restricted SMAD protein phosphorylation	2	4.87805	0.026829	PMEPA1, SMAD6	39	12	16792	71.7607	1	0.210888	0.194571
GOTERM_BP_ALL	GO:0008286~insulin receptor signaling pathway	3	7.31707	0.0269549	PTPRE, IL1B, ATP6V0D1	39	113	16792	11.4309	1	0.210888	0.194571
GOTERM_BP_ALL	GO:0045807~positive regulation of endocytosis	3	7.31707	0.0269549	HIP1, IL1B, CD14	39	113	16792	11.4309	1	0.210888	0.194571
GOTERM_BP_ALL	GO:0032388~positive regulation of intracellular transport	4	9.7561	0.027076	NLRP12, SMAD3, IL1B, SLC9A1	39	288	16792	5.98006	1	0.211028	0.194699
GOTERM_BP_ALL	GO:0097530~granulocyte migration	3	7.31707	0.0273976	IL1B, S100A12, S100A8	39	114	16792	11.3306	1	0.212722	0.196263
GOTERM_BP_ALL	GO:0051235~maintenance of location	4	9.7561	0.0275613	SRGN, SCARB1, IL1B, S100A8	39	290	16792	5.93882	1	0.213182	0.196687
GOTERM_BP_ALL	GO:0031503~protein complex localization	3	7.31707	0.0278433	NLRP12, HIP1, IL1B	39	115	16792	11.2321	1	0.214551	0.19795
GOTERM_BP_ALL	GO:0031333~negative regulation of protein complex assembly	3	7.31707	0.0282919	MYADM, PMEPA1, SMAD6	39	116	16792	11.1353	1	0.217188	0.200383
GOTERM_BP_ALL	GO:0040012~regulation of locomotion	6	14.6341	0.0284272	ROBO2, CCR1, SCARB1, SMAD3, MYADM, TRIB1	39	768	16792	3.36378	1	0.217409	0.200587
GOTERM_BP_ALL	GO:0032956~regulation of actin cytoskeleton organization	4	9.7561	0.0285457	SMAD3, MYADM, ARHGEF10L, SLC9A1	39	294	16792	5.85802	1	0.217502	0.200672
GOTERM_BP_ALL	GO:0019219~regulation of nucleobase-containing compound metabolic process	16	39.0244	0.0286533	RBM38, ZHX2, HIP1, SMAD3, USP3, ARHGEF10L, SMAD6, SLC9A1, PHF20L1, NLRP12, IL1B, IRF8, S100A12, TRIB1, S100A8, IFNAR1	39	4104	16792	1.67861	1	0.217509	0.200679
GOTERM_BP_ALL	GO:0071375~cellular response to peptide hormone stimulus	4	9.7561	0.0287948	PTPRE, IL1B, ATP6V0D1, SLC9A1	39	295	16792	5.83816	1	0.217774	0.200924
GOTERM_BP_ALL	GO:0051170~nuclear import	4	9.7561	0.0298026	NLRP12, SMAD3, IL1B, SLC9A1	39	299	16792	5.76005	1	0.224005	0.206673
GOTERM_BP_ALL	GO:0098602~single organism cell adhesion	6	14.6341	0.0299846	SMAD3, TTYH1, IL1B, MYADM, S100A8, IFNAR1	39	779	16792	3.31628	1	0.224005	0.206673
GOTERM_BP_ALL	GO:0071902~positive regulation of protein serine/threonine kinase activity	4	9.7561	0.0300575	ACSL1, IL1B, S100A12, DUSP6	39	300	16792	5.74085	1	0.224005	0.206673
GOTERM_BP_ALL	GO:1903533~regulation of protein targeting	4	9.7561	0.0300575	NLRP12, SMAD3, IL1B, SLC9A1	39	300	16792	5.74085	1	0.224005	0.206673
GOTERM_BP_ALL	GO:0010467~gene expression	19	46.3415	0.0302777	CCR1, SRGN, RBM38, ZHX2, HIP1, SMAD3, USP3, ARHGEF10L, SMAD6, SLC9A1, PHF20L1, NLRP12, IL1B, MYADM, IRF8, S100A12, TRIB1, S100A8, IFNAR1	39	5306	16792	1.54179	1	0.224826	0.20743
GOTERM_BP_ALL	GO:0097659~nucleic acid-templated transcription	15	36.5854	0.0314421	ZHX2, HIP1, SMAD3, USP3, ARHGEF10L, SMAD6, SLC9A1, PHF20L1, NLRP12, IL1B, IRF8, S100A12, TRIB1, S100A8, IFNAR1	39	3771	16792	1.71267	1	0.232626	0.214626
GOTERM_BP_ALL	GO:0051704~multi-organism process	11	26.8293	0.0317626	SCARB1, SMAD3, IL1B, IRF8, S100A12, CD14, TRIB1, LYST, S100A8, CTSB, IFNAR1	39	2341	16792	2.02315	1	0.234149	0.216032
GOTERM_BP_ALL	GO:0031324~negative regulation of cellular metabolic process	11	26.8293	0.0320977	ZHX2, NLRP12, SMAD3, IL1B, USP3, MYADM, IRF8, PMEPA1, SMAD6, TRIB1, DUSP6	39	2345	16792	2.0197	1	0.235768	0.217525
GOTERM_BP_ALL	GO:0009056~catabolic process	10	24.3902	0.0323824	SCARB1, ZHX2, SMAD3, ACSL1, CPQ, IL1B, USP3, TRIB1, SLC9A1, CTSB	39	2012	16792	2.13998	1	0.237007	0.218668
GOTERM_BP_ALL	GO:0002682~regulation of immune system process	8	19.5122	0.0328488	CCR1, SMAD3, IL1B, CD14, TRIB1, LAIR1, CTSB, IFNAR1	39	1378	16792	2.49965	1	0.239562	0.221025
GOTERM_BP_ALL	GO:0051017~actin filament bundle assembly	3	7.31707	0.0334164	SMAD3, ARHGEF10L, SLC9A1	39	127	16792	10.1708	1	0.241187	0.222525
GOTERM_BP_ALL	GO:0090288~negative regulation of cellular response to growth factor stimulus	3	7.31707	0.0334164	SMAD3, PMEPA1, SMAD6	39	127	16792	10.1708	1	0.241187	0.222525
GOTERM_BP_ALL	GO:0042226~interleukin-6 biosynthetic process	2	4.87805	0.033426	NLRP12, IL1B	39	15	16792	57.4085	1	0.241187	0.222525
GOTERM_BP_ALL	GO:1901653~cellular response to peptide	4	9.7561	0.0340204	PTPRE, IL1B, ATP6V0D1, SLC9A1	39	315	16792	5.46748	1	0.244611	0.225684
GOTERM_BP_ALL	GO:0061572~actin filament bundle organization	3	7.31707	0.0353638	SMAD3, ARHGEF10L, SLC9A1	39	131	16792	9.86025	1	0.253379	0.233774
GOTERM_BP_ALL	GO:0045408~regulation of interleukin-6 biosynthetic process	2	4.87805	0.0356153	NLRP12, IL1B	39	16	16792	53.8205	1	0.253768	0.234132
GOTERM_BP_ALL	GO:0019221~cytokine-mediated signaling pathway	5	12.1951	0.0356908	CCR1, ACSL1, IL1B, IRF8, IFNAR1	39	554	16792	3.88596	1	0.253768	0.234132
GOTERM_BP_ALL	GO:0044260~cellular macromolecule metabolic process	26	63.4146	0.0357909	HIP1, ARHGEF10L, SLC9A1, S100A12, PMEPA1, TK2, LONRF1, CTSB, CCR1, RBM38, ZHX2, SMAD3, ACSL1, USP3, SMAD6, DUSP6, PHF20L1, PTPRE, NLRP12, IL1B, MYADM, BMP2K, IRF8, TRIB1, S100A8, IFNAR1	39	8387	16792	1.33476	1	0.253768	0.234132
GOTERM_BP_ALL	GO:0051092~positive regulation of NF-kappaB transcription factor activity	3	7.31707	0.0363539	IL1B, S100A12, S100A8	39	133	16792	9.71197	1	0.256867	0.236992
GOTERM_BP_ALL	GO:1901699~cellular response to nitrogen compound	5	12.1951	0.0365019	PTPRE, SMAD3, IL1B, ATP6V0D1, SLC9A1	39	558	16792	3.8581	1	0.257024	0.237136
GOTERM_BP_ALL	GO:1903532~positive regulation of secretion by cell	4	9.7561	0.0373783	NLRP12, IL1B, CD14, IFNAR1	39	327	16792	5.26684	1	0.261392	0.241167
GOTERM_BP_ALL	GO:0043405~regulation of MAP kinase activity	4	9.7561	0.0373783	IL1B, S100A12, TRIB1, DUSP6	39	327	16792	5.26684	1	0.261392	0.241167
GOTERM_BP_ALL	GO:0017038~protein import	4	9.7561	0.0379541	NLRP12, SMAD3, IL1B, SLC9A1	39	329	16792	5.23482	1	0.264513	0.244046
GOTERM_BP_ALL	GO:0030003~cellular cation homeostasis	5	12.1951	0.0396395	CCR1, SMAD3, ATP6V0D1, S100A8, SLC9A1	39	573	16792	3.7571	1	0.273503	0.252341
GOTERM_BP_ALL	GO:0032970~regulation of actin filament-based process	4	9.7561	0.0397089	SMAD3, MYADM, ARHGEF10L, SLC9A1	39	335	16792	5.14106	1	0.273503	0.252341
GOTERM_BP_ALL	GO:0007015~actin filament organization	4	9.7561	0.0397089	SMAD3, MYADM, ARHGEF10L, SLC9A1	39	335	16792	5.14106	1	0.273503	0.252341
GOTERM_BP_ALL	GO:0000165~MAPK cascade	6	14.6341	0.0397824	CCR1, NLRP12, IL1B, S100A12, TRIB1, DUSP6	39	841	16792	3.0718	1	0.273503	0.252341
GOTERM_BP_ALL	GO:0030502~negative regulation of bone mineralization	2	4.87805	0.0399794	SRGN, CCR1	39	18	16792	47.8405	1	0.273503	0.252341
GOTERM_BP_ALL	GO:0043623~cellular protein complex assembly	5	12.1951	0.0400694	HIP1, SMAD3, MYADM, PMEPA1, SMAD6	39	575	16792	3.74404	1	0.273503	0.252341
GOTERM_BP_ALL	GO:0051179~localization	20	48.7805	0.0401817	CCR1, SRGN, SCARB1, HIP1, SMAD3, ACSL1, TTYH1, LYST, SLC9A1, NLRP12, IL1B, MYADM, IRF8, S100A12, RIN3, CD14, TRIB1, ATP6V0D1, S100A8, IFNAR1	39	5872	16792	1.4665	1	0.273503	0.252341
GOTERM_BP_ALL	GO:0009891~positive regulation of biosynthetic process	9	21.9512	0.0403255	SCARB1, NLRP12, SMAD3, IL1B, IRF8, ARHGEF10L, SMAD6, SLC9A1, IFNAR1	39	1760	16792	2.20175	1	0.27357	0.252403
GOTERM_BP_ALL	GO:0031326~regulation of cellular biosynthetic process	16	39.0244	0.0409684	SCARB1, ZHX2, HIP1, SMAD3, USP3, ARHGEF10L, SMAD6, SLC9A1, PHF20L1, NLRP12, IL1B, IRF8, S100A12, TRIB1, S100A8, IFNAR1	39	4284	16792	1.60808	1	0.277011	0.255578
GOTERM_BP_ALL	GO:0032774~RNA biosynthetic process	15	36.5854	0.0413322	ZHX2, HIP1, SMAD3, USP3, ARHGEF10L, SMAD6, SLC9A1, PHF20L1, NLRP12, IL1B, IRF8, S100A12, TRIB1, S100A8, IFNAR1	39	3905	16792	1.6539	1	0.278034	0.256521
GOTERM_BP_ALL	GO:0072073~kidney epithelium development	3	7.31707	0.0414624	ROBO2, SMAD3, SMAD6	39	143	16792	9.03281	1	0.278034	0.256521
GOTERM_BP_ALL	GO:0060284~regulation of cell development	6	14.6341	0.0415281	ROBO2, ZHX2, SMAD3, IL1B, MYADM, TRIB1	39	851	16792	3.0357	1	0.278034	0.256521
GOTERM_BP_ALL	GO:0042832~defense response to protozoan	2	4.87805	0.0421542	IRF8, LYST	39	19	16792	45.3225	1	0.280387	0.258692
GOTERM_BP_ALL	GO:0034114~regulation of heterotypic cell-cell adhesion	2	4.87805	0.0421542	IL1B, MYADM	39	19	16792	45.3225	1	0.280387	0.258692
GOTERM_BP_ALL	GO:0006873~cellular ion homeostasis	5	12.1951	0.042929	CCR1, SMAD3, ATP6V0D1, S100A8, SLC9A1	39	588	16792	3.66126	1	0.284614	0.262592
GOTERM_BP_ALL	GO:0070168~negative regulation of biomineral tissue development	2	4.87805	0.0443243	SRGN, CCR1	39	20	16792	43.0564	1	0.291968	0.269377
GOTERM_BP_ALL	GO:1902895~positive regulation of pri-miRNA transcription from RNA polymerase II promoter	2	4.87805	0.0443243	SMAD3, SMAD6	39	20	16792	43.0564	1	0.291968	0.269377
GOTERM_BP_ALL	GO:0043409~negative regulation of MAPK cascade	3	7.31707	0.0446505	NLRP12, IL1B, DUSP6	39	149	16792	8.66908	1	0.293171	0.270487
GOTERM_BP_ALL	GO:0098609~cell-cell adhesion	7	17.0732	0.0449879	ROBO2, SMAD3, TTYH1, IL1B, MYADM, S100A8, IFNAR1	39	1164	16792	2.5893	1	0.29444	0.271658
GOTERM_BP_ALL	GO:0009889~regulation of biosynthetic process	16	39.0244	0.0454289	SCARB1, ZHX2, HIP1, SMAD3, USP3, ARHGEF10L, SMAD6, SLC9A1, PHF20L1, NLRP12, IL1B, IRF8, S100A12, TRIB1, S100A8, IFNAR1	39	4339	16792	1.5877	1	0.296376	0.273444
GOTERM_BP_ALL	GO:0023014~signal transduction by protein phosphorylation	6	14.6341	0.0462859	CCR1, NLRP12, IL1B, S100A12, TRIB1, DUSP6	39	877	16792	2.94571	1	0.301005	0.277715
GOTERM_BP_ALL	GO:0001562~response to protozoan	2	4.87805	0.0464895	IRF8, LYST	39	21	16792	41.0061	1	0.30137	0.278052
GOTERM_BP_ALL	GO:0034654~nucleobase-containing compound biosynthetic process	16	39.0244	0.0469645	ZHX2, HIP1, SMAD3, USP3, ARHGEF10L, SMAD6, SLC9A1, PHF20L1, NLRP12, IL1B, IRF8, S100A12, TK2, TRIB1, S100A8, IFNAR1	39	4357	16792	1.58114	1	0.303486	0.280004
GOTERM_BP_ALL	GO:0016192~vesicle-mediated transport	8	19.5122	0.0477707	SRGN, CCR1, SCARB1, HIP1, IL1B, IRF8, RIN3, CD14	39	1494	16792	2.30556	1	0.307722	0.283912
GOTERM_BP_ALL	GO:0071363~cellular response to growth factor stimulus	5	12.1951	0.0480289	SMAD3, IL1B, PMEPA1, SMAD6, DUSP6	39	610	16792	3.52921	1	0.308133	0.284291
GOTERM_BP_ALL	GO:0006351~transcription, DNA-templated	14	34.1463	0.0482449	ZHX2, HIP1, SMAD3, USP3, ARHGEF10L, SMAD6, SLC9A1, NLRP12, IL1B, IRF8, S100A12, TRIB1, S100A8, IFNAR1	39	3605	16792	1.67209	1	0.308133	0.284291
GOTERM_BP_ALL	GO:0034504~protein localization to nucleus	4	9.7561	0.0484381	NLRP12, SMAD3, IL1B, SLC9A1	39	363	16792	4.74451	1	0.308133	0.284291
GOTERM_BP_ALL	GO:1903829~positive regulation of cellular protein localization	4	9.7561	0.0484381	NLRP12, SMAD3, IL1B, SLC9A1	39	363	16792	4.74451	1	0.308133	0.284291
GOTERM_BP_ALL	GO:0050718~positive regulation of interleukin-1 beta secretion	2	4.87805	0.04865	NLRP12, IFNAR1	39	22	16792	39.1422	1	0.308507	0.284636
GOTERM_BP_ALL	GO:2000112~regulation of cellular macromolecule biosynthetic process	15	36.5854	0.048799	ZHX2, HIP1, SMAD3, USP3, ARHGEF10L, SMAD6, SLC9A1, PHF20L1, NLRP12, IL1B, IRF8, S100A12, TRIB1, S100A8, IFNAR1	39	3991	16792	1.61826	1	0.308507	0.284636
GOTERM_BP_ALL	GO:0051701~interaction with host	3	7.31707	0.0495978	SCARB1, SMAD3, CTSB	39	158	16792	8.17527	1	0.312589	0.288402

## Sheet: SUPER.EC96
Category	Term	Count	%	PValue	Genes	List Total	Pop Hits	Pop Total	Fold Enrichment	Bonferroni	Benjamini	FDR
GOTERM_BP_ALL	GO:0031347~regulation of defense response	6	33.3333	0.000314247	NLRP12, S100A12, CD14, S100A8, CTSB, IFNAR1	17	676	16792	8.76714	0.259761	0.151484	0.151326
GOTERM_BP_ALL	GO:0031349~positive regulation of defense response	5	27.7778	0.000468657	NLRP12, S100A12, CD14, S100A8, CTSB	17	402	16792	12.2856	0.361485	0.151484	0.151326
GOTERM_BP_ALL	GO:0050663~cytokine secretion	4	22.2222	0.000474871	NLRP12, S100A12, CD14, IFNAR1	17	165	16792	23.9458	0.365273	0.151484	0.151326
GOTERM_BP_ALL	GO:0032103~positive regulation of response to external stimulus	4	22.2222	0.00190952	CCR1, NLRP12, S100A12, S100A8	17	267	16792	14.798	0.839451	0.33702	0.336668
GOTERM_BP_ALL	GO:0006952~defense response	7	38.8889	0.00195236	CCR1, NLRP12, S100A12, CD14, S100A8, CTSB, IFNAR1	17	1518	16792	4.55491	0.845912	0.33702	0.336668
GOTERM_BP_ALL	GO:0001816~cytokine production	5	27.7778	0.0025051	NLRP12, S100A12, CD14, S100A8, IFNAR1	17	631	16792	7.82698	0.909318	0.33702	0.336668
GOTERM_BP_ALL	GO:0006954~inflammatory response	5	27.7778	0.00259294	CCR1, NLRP12, S100A12, CD14, S100A8	17	637	16792	7.75326	0.916646	0.33702	0.336668
GOTERM_BP_ALL	GO:0046903~secretion	6	33.3333	0.00281731	CCR1, NLRP12, S100A12, CD14, S100A8, IFNAR1	17	1098	16792	5.39762	0.932792	0.33702	0.336668
GOTERM_BP_ALL	GO:0050715~positive regulation of cytokine secretion	3	16.6667	0.00375951	NLRP12, CD14, IFNAR1	17	97	16792	30.5494	0.972803	0.35526	0.354889
GOTERM_BP_ALL	GO:0032101~regulation of response to external stimulus	5	27.7778	0.00405737	ROBO2, CCR1, NLRP12, S100A12, S100A8	17	721	16792	6.84996	0.979571	0.35526	0.354889
GOTERM_BP_ALL	GO:0051047~positive regulation of secretion	4	22.2222	0.00427602	NLRP12, CD14, S100A8, IFNAR1	17	355	16792	11.1297	0.983443	0.35526	0.354889
GOTERM_BP_ALL	GO:0006928~movement of cell or subcellular component	7	38.8889	0.00459442	ROBO2, CCR1, NLRP12, MYADM, S100A12, S100A8, MTSS1	17	1795	16792	3.85201	0.987808	0.35526	0.354889
GOTERM_BP_ALL	GO:0050900~leukocyte migration	4	22.2222	0.00502126	CCR1, NLRP12, S100A12, S100A8	17	376	16792	10.5081	0.991913	0.35526	0.354889
GOTERM_BP_ALL	GO:0050729~positive regulation of inflammatory response	3	16.6667	0.00541896	NLRP12, S100A12, S100A8	17	117	16792	25.3273	0.994484	0.35526	0.354889
GOTERM_BP_ALL	GO:0080134~regulation of response to stress	6	33.3333	0.00556834	NLRP12, S100A12, CD14, S100A8, CTSB, IFNAR1	17	1285	16792	4.61213	0.995222	0.35526	0.354889
GOTERM_BP_ALL	GO:0044707~single-multicellular organism process	12	66.6667	0.00680007	ROBO2, CCR1, ZHX2, NLRP12, KCNK10, MYADM, S100A12, CD14, S100A8, MTSS1, CTSB, IFNAR1	17	5943	16792	1.99448	0.998541	0.379444	0.379047
GOTERM_BP_ALL	GO:0045087~innate immune response	5	27.7778	0.00686638	S100A12, CD14, S100A8, CTSB, IFNAR1	17	836	16792	5.90768	0.998631	0.379444	0.379047
GOTERM_BP_ALL	GO:0070887~cellular response to chemical stimulus	8	44.4444	0.00737685	ROBO2, CCR1, NLRP12, S100A12, CD14, S100A8, CTSB, IFNAR1	17	2648	16792	2.98418	0.999163	0.379444	0.379047
GOTERM_BP_ALL	GO:0032501~multicellular organismal process	13	72.2222	0.00753337	ROBO2, CCR1, ZHX2, KCNK10, MTSS1, NLRP12, MYADM, S100A12, CD14, S100A8, SNTB1, CTSB, IFNAR1	17	7027	16792	1.82737	0.99928	0.379444	0.379047
GOTERM_BP_ALL	GO:0050707~regulation of cytokine secretion	3	16.6667	0.00876209	NLRP12, CD14, IFNAR1	17	150	16792	19.7553	0.99978	0.390769	0.390361
GOTERM_BP_ALL	GO:0009306~protein secretion	4	22.2222	0.00924545	NLRP12, S100A12, CD14, IFNAR1	17	469	16792	8.42443	0.999862	0.390769	0.390361
GOTERM_BP_ALL	GO:0009605~response to external stimulus	7	38.8889	0.00935848	ROBO2, CCR1, NLRP12, S100A12, CD14, S100A8, IFNAR1	17	2073	16792	3.33543	0.999876	0.390769	0.390361
GOTERM_BP_ALL	GO:0051050~positive regulation of transport	5	27.7778	0.00959487	CCR1, NLRP12, CD14, S100A8, IFNAR1	17	920	16792	5.36829	0.999902	0.390769	0.390361
GOTERM_BP_ALL	GO:0097529~myeloid leukocyte migration	3	16.6667	0.00979985	CCR1, S100A12, S100A8	17	159	16792	18.6371	0.999919	0.390769	0.390361
GOTERM_BP_ALL	GO:0032940~secretion by cell	5	27.7778	0.0113567	CCR1, NLRP12, S100A12, CD14, IFNAR1	17	966	16792	5.11265	0.999982	0.410983	0.410553
GOTERM_BP_ALL	GO:0048583~regulation of response to stimulus	9	50	0.0114527	ROBO2, CCR1, NLRP12, MYADM, S100A12, CD14, S100A8, CTSB, IFNAR1	17	3636	16792	2.44496	0.999984	0.410983	0.410553
GOTERM_BP_ALL	GO:0040011~locomotion	6	33.3333	0.0115951	ROBO2, CCR1, NLRP12, MYADM, S100A12, S100A8	17	1530	16792	3.87359	0.999986	0.410983	0.410553
GOTERM_BP_ALL	GO:0006955~immune response	6	33.3333	0.0122651	CCR1, S100A12, CD14, S100A8, CTSB, IFNAR1	17	1551	16792	3.82114	0.999993	0.419204	0.418765
GOTERM_BP_ALL	GO:0009617~response to bacterium	4	22.2222	0.0138232	S100A12, CD14, S100A8, IFNAR1	17	544	16792	7.26298	0.999998	0.432026	0.431575
GOTERM_BP_ALL	GO:0030595~leukocyte chemotaxis	3	16.6667	0.0143256	CCR1, S100A12, S100A8	17	194	16792	15.2747	0.999999	0.432026	0.431575
GOTERM_BP_ALL	GO:0006935~chemotaxis	4	22.2222	0.014376	ROBO2, CCR1, S100A12, S100A8	17	552	16792	7.15772	0.999999	0.432026	0.431575
GOTERM_BP_ALL	GO:0042330~taxis	4	22.2222	0.014446	ROBO2, CCR1, S100A12, S100A8	17	553	16792	7.14477	0.999999	0.432026	0.431575
GOTERM_BP_ALL	GO:0032268~regulation of cellular protein metabolic process	7	38.8889	0.016893	CCR1, NLRP12, MYADM, S100A12, FBXL5, S100A8, IFNAR1	17	2346	16792	2.94729	1	0.479216	0.478715
GOTERM_BP_ALL	GO:0050714~positive regulation of protein secretion	3	16.6667	0.0172481	NLRP12, CD14, IFNAR1	17	214	16792	13.8472	1	0.479216	0.478715
GOTERM_BP_ALL	GO:0007155~cell adhesion	6	33.3333	0.0177731	ROBO2, CCR1, MYADM, S100A8, MTSS1, IFNAR1	17	1699	16792	3.48828	1	0.479216	0.478715
GOTERM_BP_ALL	GO:0022610~biological adhesion	6	33.3333	0.0180269	ROBO2, CCR1, MYADM, S100A8, MTSS1, IFNAR1	17	1705	16792	3.476	1	0.479216	0.478715
GOTERM_BP_ALL	GO:0007165~signal transduction	11	61.1111	0.0200517	ROBO2, CCR1, NLRP12, KCNK10, MYADM, S100A12, CD14, S100A8, MTSS1, CTSB, IFNAR1	17	5775	16792	1.88146	1	0.483991	0.483485
GOTERM_BP_ALL	GO:0050718~positive regulation of interleukin-1 beta secretion	2	11.1111	0.0207668	NLRP12, IFNAR1	17	22	16792	89.7968	1	0.483991	0.483485
GOTERM_BP_ALL	GO:0002376~immune system process	7	38.8889	0.0212658	CCR1, NLRP12, S100A12, CD14, S100A8, CTSB, IFNAR1	17	2465	16792	2.80501	1	0.483991	0.483485
GOTERM_BP_ALL	GO:0044267~cellular protein metabolic process	10	55.5556	0.0213651	CCR1, NLRP12, MYADM, S100A12, FBXL5, LONRF1, S100A8, MRPL33, CTSB, IFNAR1	17	4900	16792	2.01585	1	0.483991	0.483485
GOTERM_BP_ALL	GO:0032879~regulation of localization	7	38.8889	0.021586	CCR1, NLRP12, KCNK10, MYADM, CD14, S100A8, IFNAR1	17	2473	16792	2.79594	1	0.483991	0.483485
GOTERM_BP_ALL	GO:0050716~positive regulation of interleukin-1 secretion	2	11.1111	0.0217011	NLRP12, IFNAR1	17	23	16792	85.8926	1	0.483991	0.483485
GOTERM_BP_ALL	GO:0051049~regulation of transport	6	33.3333	0.0221864	CCR1, NLRP12, KCNK10, CD14, S100A8, IFNAR1	17	1796	16792	3.29988	1	0.483991	0.483485
GOTERM_BP_ALL	GO:0016477~cell migration	5	27.7778	0.0225812	CCR1, NLRP12, MYADM, S100A12, S100A8	17	1184	16792	4.1713	1	0.483991	0.483485
GOTERM_BP_ALL	GO:0051246~regulation of protein metabolic process	7	38.8889	0.0231963	CCR1, NLRP12, MYADM, S100A12, FBXL5, S100A8, IFNAR1	17	2512	16792	2.75253	1	0.483991	0.483485
GOTERM_BP_ALL	GO:0060326~cell chemotaxis	3	16.6667	0.0232639	CCR1, S100A12, S100A8	17	251	16792	11.806	1	0.483991	0.483485
GOTERM_BP_ALL	GO:0007249~I-kappaB kinase/NF-kappaB signaling	3	16.6667	0.024311	NLRP12, S100A12, CD14	17	257	16792	11.5303	1	0.48618	0.485672
GOTERM_BP_ALL	GO:0051046~regulation of secretion	4	22.2222	0.0252564	NLRP12, CD14, S100A8, IFNAR1	17	683	16792	5.78486	1	0.48618	0.485672
GOTERM_BP_ALL	GO:0036336~dendritic cell migration	2	11.1111	0.0263599	CCR1, NLRP12	17	28	16792	70.5546	1	0.48618	0.485672
GOTERM_BP_ALL	GO:0050706~regulation of interleukin-1 beta secretion	2	11.1111	0.0272892	NLRP12, IFNAR1	17	29	16792	68.1217	1	0.48618	0.485672
GOTERM_BP_ALL	GO:0032731~positive regulation of interleukin-1 beta production	2	11.1111	0.0282176	NLRP12, IFNAR1	17	30	16792	65.851	1	0.48618	0.485672
GOTERM_BP_ALL	GO:0044765~single-organism transport	8	44.4444	0.0289857	CCR1, NLRP12, KCNK10, MYADM, S100A12, CD14, S100A8, IFNAR1	17	3415	16792	2.31394	1	0.48618	0.485672
GOTERM_BP_ALL	GO:0035556~intracellular signal transduction	7	38.8889	0.0299294	CCR1, NLRP12, MYADM, S100A12, CD14, S100A8, IFNAR1	17	2657	16792	2.60232	1	0.48618	0.485672
GOTERM_BP_ALL	GO:0051239~regulation of multicellular organismal process	7	38.8889	0.0300308	ROBO2, CCR1, ZHX2, NLRP12, MYADM, CD14, IFNAR1	17	2659	16792	2.60036	1	0.48618	0.485672
GOTERM_BP_ALL	GO:0050704~regulation of interleukin-1 secretion	2	11.1111	0.030072	NLRP12, IFNAR1	17	32	16792	61.7353	1	0.48618	0.485672
GOTERM_BP_ALL	GO:0001932~regulation of protein phosphorylation	5	27.7778	0.0306679	CCR1, NLRP12, MYADM, S100A12, IFNAR1	17	1300	16792	3.7991	1	0.48618	0.485672
GOTERM_BP_ALL	GO:0050702~interleukin-1 beta secretion	2	11.1111	0.0319231	NLRP12, IFNAR1	17	34	16792	58.1038	1	0.48618	0.485672
GOTERM_BP_ALL	GO:0032496~response to lipopolysaccharide	3	16.6667	0.0327657	CD14, S100A8, IFNAR1	17	302	16792	9.81223	1	0.48618	0.485672
GOTERM_BP_ALL	GO:0051674~localization of cell	5	27.7778	0.0330134	CCR1, NLRP12, MYADM, S100A12, S100A8	17	1330	16792	3.7134	1	0.48618	0.485672
GOTERM_BP_ALL	GO:0048870~cell motility	5	27.7778	0.0330134	CCR1, NLRP12, MYADM, S100A12, S100A8	17	1330	16792	3.7134	1	0.48618	0.485672
GOTERM_BP_ALL	GO:0009966~regulation of signal transduction	7	38.8889	0.0336766	CCR1, NLRP12, MYADM, S100A12, CD14, S100A8, IFNAR1	17	2728	16792	2.53459	1	0.48618	0.485672
GOTERM_BP_ALL	GO:0044700~single organism signaling	11	61.1111	0.0337635	ROBO2, CCR1, NLRP12, KCNK10, MYADM, S100A12, CD14, S100A8, MTSS1, CTSB, IFNAR1	17	6207	16792	1.75051	1	0.48618	0.485672
GOTERM_BP_ALL	GO:0032732~positive regulation of interleukin-1 production	2	11.1111	0.0346935	NLRP12, IFNAR1	17	37	16792	53.3927	1	0.48618	0.485672
GOTERM_BP_ALL	GO:0048518~positive regulation of biological process	10	55.5556	0.0348592	ROBO2, CCR1, NLRP12, MYADM, S100A12, CD14, FBXL5, S100A8, CTSB, IFNAR1	17	5285	16792	1.869	1	0.48618	0.485672
GOTERM_BP_ALL	GO:0050727~regulation of inflammatory response	3	16.6667	0.0351922	NLRP12, S100A12, S100A8	17	314	16792	9.43724	1	0.48618	0.485672
GOTERM_BP_ALL	GO:0065008~regulation of biological quality	8	44.4444	0.0352058	ROBO2, CCR1, NLRP12, KCNK10, MYADM, S100A12, FBXL5, S100A8	17	3548	16792	2.2272	1	0.48618	0.485672
GOTERM_BP_ALL	GO:0002237~response to molecule of bacterial origin	3	16.6667	0.0356034	CD14, S100A8, IFNAR1	17	316	16792	9.37751	1	0.48618	0.485672
GOTERM_BP_ALL	GO:0048584~positive regulation of response to stimulus	6	33.3333	0.0357445	CCR1, NLRP12, S100A12, CD14, S100A8, CTSB	17	2030	16792	2.9195	1	0.48618	0.485672
GOTERM_BP_ALL	GO:0023052~signaling	11	61.1111	0.0358524	ROBO2, CCR1, NLRP12, KCNK10, MYADM, S100A12, CD14, S100A8, MTSS1, CTSB, IFNAR1	17	6260	16792	1.73569	1	0.48618	0.485672
GOTERM_BP_ALL	GO:0007154~cell communication	11	61.1111	0.0364614	ROBO2, CCR1, NLRP12, KCNK10, MYADM, S100A12, CD14, S100A8, MTSS1, CTSB, IFNAR1	17	6275	16792	1.73154	1	0.48618	0.485672
GOTERM_BP_ALL	GO:0050832~defense response to fungus	2	11.1111	0.0365363	S100A12, S100A8	17	39	16792	50.6546	1	0.48618	0.485672
GOTERM_BP_ALL	GO:0050701~interleukin-1 secretion	2	11.1111	0.0374564	NLRP12, IFNAR1	17	40	16792	49.3882	1	0.48618	0.485672
GOTERM_BP_ALL	GO:1903532~positive regulation of secretion by cell	3	16.6667	0.0378989	NLRP12, CD14, IFNAR1	17	327	16792	9.06206	1	0.48618	0.485672
GOTERM_BP_ALL	GO:0034097~response to cytokine	4	22.2222	0.0381753	CCR1, NLRP12, CD14, IFNAR1	17	802	16792	4.92651	1	0.48618	0.485672
GOTERM_BP_ALL	GO:0042325~regulation of phosphorylation	5	27.7778	0.0382871	CCR1, NLRP12, MYADM, S100A12, IFNAR1	17	1393	16792	3.54546	1	0.48618	0.485672
GOTERM_BP_ALL	GO:1902578~single-organism localization	8	44.4444	0.0386217	CCR1, NLRP12, KCNK10, MYADM, S100A12, CD14, S100A8, IFNAR1	17	3614	16792	2.18653	1	0.48618	0.485672
GOTERM_BP_ALL	GO:0010033~response to organic substance	7	38.8889	0.0391179	ROBO2, CCR1, NLRP12, CD14, S100A8, CTSB, IFNAR1	17	2822	16792	2.45016	1	0.48618	0.485672
GOTERM_BP_ALL	GO:0032270~positive regulation of cellular protein metabolic process	5	27.7778	0.0406931	CCR1, NLRP12, S100A12, FBXL5, S100A8	17	1420	16792	3.47804	1	0.491277	0.490763
GOTERM_BP_ALL	GO:0043207~response to external biotic stimulus	4	22.2222	0.0415086	S100A12, CD14, S100A8, IFNAR1	17	829	16792	4.76605	1	0.491277	0.490763
GOTERM_BP_ALL	GO:0051707~response to other organism	4	22.2222	0.0415086	S100A12, CD14, S100A8, IFNAR1	17	829	16792	4.76605	1	0.491277	0.490763
GOTERM_BP_ALL	GO:0051240~positive regulation of multicellular organismal process	5	27.7778	0.0416986	ROBO2, CCR1, NLRP12, CD14, IFNAR1	17	1431	16792	3.45131	1	0.491277	0.490763
GOTERM_BP_ALL	GO:0006950~response to stress	8	44.4444	0.0420948	CCR1, NLRP12, S100A12, CD14, S100A8, MTSS1, CTSB, IFNAR1	17	3677	16792	2.14907	1	0.491277	0.490763
GOTERM_BP_ALL	GO:0019538~protein metabolic process	10	55.5556	0.0426351	CCR1, NLRP12, MYADM, S100A12, FBXL5, LONRF1, S100A8, MRPL33, CTSB, IFNAR1	17	5457	16792	1.81009	1	0.491588	0.491074
GOTERM_BP_ALL	GO:0045088~regulation of innate immune response	3	16.6667	0.0451196	CD14, CTSB, IFNAR1	17	360	16792	8.23137	1	0.514041	0.513504
GOTERM_BP_ALL	GO:0032651~regulation of interleukin-1 beta production	2	11.1111	0.0466128	NLRP12, IFNAR1	17	50	16792	39.5106	1	0.519876	0.519333
GOTERM_BP_ALL	GO:0009607~response to biotic stimulus	4	22.2222	0.0472557	S100A12, CD14, S100A8, IFNAR1	17	873	16792	4.52584	1	0.519876	0.519333
GOTERM_BP_ALL	GO:0071310~cellular response to organic substance	6	33.3333	0.0472615	ROBO2, CCR1, NLRP12, CD14, CTSB, IFNAR1	17	2186	16792	2.71116	1	0.519876	0.519333
GOTERM_BP_ALL	GO:0051090~regulation of sequence-specific DNA binding transcription factor activity	3	16.6667	0.0480965	NLRP12, S100A12, S100A8	17	373	16792	7.94449	1	0.523049	0.522503
GOTERM_BP_ALL	GO:0051247~positive regulation of protein metabolic process	5	27.7778	0.0491493	CCR1, NLRP12, S100A12, FBXL5, S100A8	17	1508	16792	3.27508	1	0.5239	0.523352
GOTERM_BP_ALL	GO:0009620~response to fungus	2	11.1111	0.0493437	S100A12, S100A8	17	53	16792	37.2741	1	0.5239	0.523352
