# Supplementary material for: Evidence for additive and synergistic action of mammalian enhancers during cell fate determination
Source: eLife. 2021 Mar 26;10:e65381. doi: 10.7554/eLife.65381 (PMC8004103; doi:10.7554/eLife.65381)
Supplement: Supplementary file 5. [file elife-65381-supp5.xlsx]

## Sheet: SUPER.EA0
Category	Term	Count	%	PValue	Genes	List Total	Pop Hits	Pop Total	Fold Enrichment	Bonferroni	Benjamini	FDR
GOTERM_BP_ALL	GO:0010632~regulation of epithelial cell migration	4	14.2857	0.00195721	SPARC, HMGB1, ETS1, HBEGF	26	169	16792	15.2863	0.946439	0.689433	0.689433
GOTERM_BP_ALL	GO:0030335~positive regulation of cell migration	5	17.8571	0.00257867	SPARC, S1PR1, HMGB1, ETS1, HBEGF	26	395	16792	8.17527	0.97888	0.689433	0.689433
GOTERM_BP_ALL	GO:2000147~positive regulation of cell motility	5	17.8571	0.00292435	SPARC, S1PR1, HMGB1, ETS1, HBEGF	26	409	16792	7.89543	0.987417	0.689433	0.689433
GOTERM_BP_ALL	GO:0051272~positive regulation of cellular component movement	5	17.8571	0.00321742	SPARC, S1PR1, HMGB1, ETS1, HBEGF	26	420	16792	7.68864	0.991889	0.689433	0.689433
GOTERM_BP_ALL	GO:0040017~positive regulation of locomotion	5	17.8571	0.0032728	SPARC, S1PR1, HMGB1, ETS1, HBEGF	26	422	16792	7.65221	0.992535	0.689433	0.689433
GOTERM_BP_ALL	GO:0044699~single-organism process	26	92.8571	0.00338396	SPARC, HMGB1, NOC2L, ETS1, RRP7A, ADAP2, TRIM28, ZMAT3, ST3GAL4, S1PR1, HIVEP2, SYNPO, ATP6V1C1, RAB11FIP4, SLC36A1, PRMT7, HLA-E, SLC2A9, COPRS, PTPRE, KATNAL1, STIM2, TBL1XR1, MDGA2, SLC27A5, HBEGF	26	13377	16792	1.25529	0.993681	0.689433	0.689433
GOTERM_BP_ALL	GO:1903825~organic acid transmembrane transport	3	10.7143	0.00405428	SLC36A1, SLC2A9, SLC27A5	26	64	16792	30.274	0.997687	0.689433	0.689433
GOTERM_BP_ALL	GO:0010631~epithelial cell migration	4	14.2857	0.00455722	SPARC, HMGB1, ETS1, HBEGF	26	228	16792	11.3306	0.998913	0.689433	0.689433
GOTERM_BP_ALL	GO:0090132~epithelium migration	4	14.2857	0.0047264	SPARC, HMGB1, ETS1, HBEGF	26	231	16792	11.1835	0.999157	0.689433	0.689433
GOTERM_BP_ALL	GO:0006325~chromatin organization	6	21.4286	0.00489229	COPRS, PRMT7, TRIM28, TBL1XR1, HMGB1, NOC2L	26	768	16792	5.04567	0.999342	0.689433	0.689433
GOTERM_BP_ALL	GO:0090130~tissue migration	4	14.2857	0.00507614	SPARC, HMGB1, ETS1, HBEGF	26	237	16792	10.9004	0.999501	0.689433	0.689433
GOTERM_BP_ALL	GO:0016569~covalent chromatin modification	5	17.8571	0.00833292	COPRS, PRMT7, TRIM28, TBL1XR1, NOC2L	26	550	16792	5.87133	0.999996	1	1
GOTERM_BP_ALL	GO:0043985~histone H4-R3 methylation	2	7.14286	0.00890096	COPRS, PRMT7	26	6	16792	215.282	0.999998	1	1
GOTERM_BP_ALL	GO:0048513~animal organ development	11	39.2857	0.0105665	COPRS, SPARC, ADAP2, TRIM28, TBL1XR1, S1PR1, HMGB1, MDGA2, ETS1, RAB11FIP4, HBEGF	26	3129	16792	2.27047	1	1	1
GOTERM_BP_ALL	GO:0010634~positive regulation of epithelial cell migration	3	10.7143	0.010579	SPARC, ETS1, HBEGF	26	105	16792	18.4527	1	1	1
GOTERM_BP_ALL	GO:0001667~ameboidal-type cell migration	4	14.2857	0.0115595	SPARC, HMGB1, ETS1, HBEGF	26	320	16792	8.07308	1	1	1
GOTERM_BP_ALL	GO:0010594~regulation of endothelial cell migration	3	10.7143	0.0125859	SPARC, HMGB1, ETS1	26	115	16792	16.8482	1	1	1
GOTERM_BP_ALL	GO:0006996~organelle organization	12	42.8571	0.0130662	COPRS, RRP7A, PRMT7, KATNAL1, TRIM28, TBL1XR1, S1PR1, HMGB1, SYNPO, NOC2L, ETS1, ATP6V1C1	26	3753	16792	2.06506	1	1	1
GOTERM_BP_ALL	GO:0015849~organic acid transport	3	10.7143	0.0143021	SLC36A1, SLC2A9, SLC27A5	26	123	16792	15.7523	1	1	1
GOTERM_BP_ALL	GO:0030334~regulation of cell migration	5	17.8571	0.0175484	SPARC, S1PR1, HMGB1, ETS1, HBEGF	26	685	16792	4.71421	1	1	1
GOTERM_BP_ALL	GO:0034969~histone arginine methylation	2	7.14286	0.0177258	COPRS, PRMT7	26	12	16792	107.641	1	1	1
GOTERM_BP_ALL	GO:0032501~multicellular organismal process	17	60.7143	0.0211338	PRMT7, SPARC, HMGB1, ETS1, HLA-E, RRP7A, COPRS, ADAP2, TRIM28, KATNAL1, TBL1XR1, S1PR1, ST3GAL4, HIVEP2, MDGA2, RAB11FIP4, HBEGF	26	7027	16792	1.56246	1	1	1
GOTERM_BP_ALL	GO:0015992~proton transport	3	10.7143	0.0215716	SLC36A1, SLC2A9, ATP6V1C1	26	153	16792	12.6637	1	1	1
GOTERM_BP_ALL	GO:0043542~endothelial cell migration	3	10.7143	0.0218357	SPARC, HMGB1, ETS1	26	154	16792	12.5814	1	1	1
GOTERM_BP_ALL	GO:0006818~hydrogen transport	3	10.7143	0.0221012	SLC36A1, SLC2A9, ATP6V1C1	26	155	16792	12.5002	1	1	1
GOTERM_BP_ALL	GO:2000145~regulation of cell motility	5	17.8571	0.0222353	SPARC, S1PR1, HMGB1, ETS1, HBEGF	26	736	16792	4.38754	1	1	1
GOTERM_BP_ALL	GO:0001525~angiogenesis	4	14.2857	0.0227445	SPARC, S1PR1, HMGB1, ETS1	26	413	16792	6.25517	1	1	1
GOTERM_BP_ALL	GO:0018216~peptidyl-arginine methylation	2	7.14286	0.0235671	COPRS, PRMT7	26	16	16792	80.7308	1	1	1
GOTERM_BP_ALL	GO:0051179~localization	15	53.5714	0.0251732	SLC36A1, SPARC, HMGB1, NOC2L, ETS1, HLA-E, SLC2A9, TRIM28, ZMAT3, STIM2, S1PR1, ATP6V1C1, SLC27A5, RAB11FIP4, HBEGF	26	5872	16792	1.64981	1	1	1
GOTERM_BP_ALL	GO:0040012~regulation of locomotion	5	17.8571	0.0255383	SPARC, S1PR1, HMGB1, ETS1, HBEGF	26	768	16792	4.20473	1	1	1
GOTERM_BP_ALL	GO:0016570~histone modification	4	14.2857	0.0268017	COPRS, PRMT7, TBL1XR1, NOC2L	26	440	16792	5.87133	1	1	1
GOTERM_BP_ALL	GO:0051276~chromosome organization	6	21.4286	0.0281113	COPRS, PRMT7, TRIM28, TBL1XR1, HMGB1, NOC2L	26	1184	16792	3.27287	1	1	1
GOTERM_BP_ALL	GO:0018193~peptidyl-amino acid modification	6	21.4286	0.0282019	COPRS, PRMT7, TRIM28, ST3GAL4, NOC2L, HBEGF	26	1185	16792	3.27011	1	1	1
GOTERM_BP_ALL	GO:0051270~regulation of cellular component movement	5	17.8571	0.0293621	SPARC, S1PR1, HMGB1, ETS1, HBEGF	26	802	16792	4.02647	1	1	1
GOTERM_BP_ALL	GO:0018195~peptidyl-arginine modification	2	7.14286	0.0322666	COPRS, PRMT7	26	22	16792	58.7133	1	1	1
GOTERM_BP_ALL	GO:0007275~multicellular organism development	13	46.4286	0.0347534	SPARC, HMGB1, ETS1, RRP7A, COPRS, ADAP2, TRIM28, TBL1XR1, S1PR1, HIVEP2, MDGA2, RAB11FIP4, HBEGF	26	4877	16792	1.72155	1	1	1
GOTERM_BP_ALL	GO:0008284~positive regulation of cell proliferation	5	17.8571	0.0351921	S1PR1, HMGB1, ETS1, HLA-E, HBEGF	26	849	16792	3.80357	1	1	1
GOTERM_BP_ALL	GO:0048514~blood vessel morphogenesis	4	14.2857	0.0354668	SPARC, S1PR1, HMGB1, ETS1	26	491	16792	5.26148	1	1	1
GOTERM_BP_ALL	GO:1903039~positive regulation of leukocyte cell-cell adhesion	3	10.7143	0.0413827	HMGB1, ETS1, HLA-E	26	218	16792	8.88779	1	1	1
GOTERM_BP_ALL	GO:0045765~regulation of angiogenesis	3	10.7143	0.0427648	SPARC, HMGB1, ETS1	26	222	16792	8.72765	1	1	1
GOTERM_BP_ALL	GO:0042060~wound healing	4	14.2857	0.0454281	SPARC, HMGB1, ETS1, HBEGF	26	542	16792	4.76639	1	1	1
GOTERM_BP_ALL	GO:0006366~transcription from RNA polymerase II promoter	7	25	0.0468056	TRIM28, TBL1XR1, S1PR1, HIVEP2, HMGB1, NOC2L, ETS1	26	1820	16792	2.48402	1	1	1
GOTERM_BP_ALL	GO:0051128~regulation of cellular component organization	8	28.5714	0.0480111	SPARC, TRIM28, S1PR1, HMGB1, SYNPO, NOC2L, ETS1, HBEGF	26	2323	16792	2.22418	1	1	1
GOTERM_BP_ALL	GO:0072358~cardiovascular system development	5	17.8571	0.0491017	SPARC, ADAP2, S1PR1, HMGB1, ETS1	26	945	16792	3.41718	1	1	1
GOTERM_BP_ALL	GO:0072359~circulatory system development	5	17.8571	0.0491017	SPARC, ADAP2, S1PR1, HMGB1, ETS1	26	945	16792	3.41718	1	1	1

## Sheet: SUPER.EA12
Category	Term	Count	%	PValue	Genes	List Total	Pop Hits	Pop Total	Fold Enrichment	Bonferroni	Benjamini	FDR
GOTERM_BP_ALL	GO:1902679~negative regulation of RNA biosynthetic process	12	25	0.00019373	ZEB1, TRIM28, FGF9, TBL1XR1, CCL5, CBX2, PDCD4, CCL3, RORB, KLF4, NOC2L, BACH1	45	1194	16792	3.75031	0.331945	0.106192	0.105682
GOTERM_BP_ALL	GO:0010558~negative regulation of macromolecule biosynthetic process	13	27.0833	0.000206409	CBX2, RORB, KLF4, NOC2L, BACH1, ZEB1, TRIM28, FGF9, TBL1XR1, CCL5, CCL3, PDCD4, HBEGF	45	1418	16792	3.42103	0.349353	0.106192	0.105682
GOTERM_BP_ALL	GO:0070887~cellular response to chemical stimulus	18	37.5	0.00020688	ANXA1, SPARC, LRRC4, RORB, PTPN12, KLF4, ETS1, LYST, BACH1, HLA-E, ZEB1, FGF9, CCL5, PXDN, CCL3, PRKACA, ATP6V1C1, HBEGF	45	2648	16792	2.53656	0.349991	0.106192	0.105682
GOTERM_BP_ALL	GO:0051253~negative regulation of RNA metabolic process	12	25	0.000269589	ZEB1, TRIM28, FGF9, TBL1XR1, CCL5, CBX2, PDCD4, CCL3, RORB, KLF4, NOC2L, BACH1	45	1240	16792	3.61118	0.429567	0.106192	0.105682
GOTERM_BP_ALL	GO:0031327~negative regulation of cellular biosynthetic process	13	27.0833	0.000307705	CBX2, RORB, KLF4, NOC2L, BACH1, ZEB1, TRIM28, FGF9, TBL1XR1, CCL5, CCL3, PDCD4, HBEGF	45	1480	16792	3.27772	0.473098	0.106192	0.105682
GOTERM_BP_ALL	GO:0010629~negative regulation of gene expression	13	27.0833	0.000317469	RNASEH2B, CBX2, RORB, KLF4, NOC2L, BACH1, ZEB1, TRIM28, FGF9, TBL1XR1, CCL5, CCL3, PDCD4	45	1485	16792	3.26668	0.483704	0.106192	0.105682
GOTERM_BP_ALL	GO:0009890~negative regulation of biosynthetic process	13	27.0833	0.000357033	CBX2, RORB, KLF4, NOC2L, BACH1, ZEB1, TRIM28, FGF9, TBL1XR1, CCL5, CCL3, PDCD4, HBEGF	45	1504	16792	3.22541	0.524541	0.106192	0.105682
GOTERM_BP_ALL	GO:0045934~negative regulation of nucleobase-containing compound metabolic process	12	25	0.000637143	ZEB1, TRIM28, FGF9, TBL1XR1, CCL5, CBX2, PDCD4, CCL3, RORB, KLF4, NOC2L, BACH1	45	1371	16792	3.26613	0.734716	0.165816	0.16502
GOTERM_BP_ALL	GO:0034097~response to cytokine	9	18.75	0.00100344	SPARC, ANXA1, CCL5, PXDN, LRRC4, CCL3, KLF4, ETS1, HLA-E	45	802	16792	4.18753	0.876338	0.232128	0.231013
GOTERM_BP_ALL	GO:1903037~regulation of leukocyte cell-cell adhesion	6	12.5	0.00130451	ZEB1, ANXA1, CCL5, KLF4, ETS1, HLA-E	45	313	16792	7.15314	0.933978	0.258631	0.257389
GOTERM_BP_ALL	GO:0051172~negative regulation of nitrogen compound metabolic process	12	25	0.00138851	ZEB1, TRIM28, FGF9, TBL1XR1, CCL5, CBX2, PDCD4, CCL3, RORB, KLF4, NOC2L, BACH1	45	1506	16792	2.97335	0.944584	0.258631	0.257389
GOTERM_BP_ALL	GO:0080134~regulation of response to stress	11	22.9167	0.00149067	RNASEH2B, ANXA1, TRIM28, CCL5, PDCD4, CCL3, KLF4, PRKACA, ETS1, HLA-E, HBEGF	45	1285	16792	3.19433	0.955215	0.258631	0.257389
GOTERM_BP_ALL	GO:0010605~negative regulation of macromolecule metabolic process	15	31.25	0.00179195	RNASEH2B, CBX2, LRRC4, RORB, KLF4, NOC2L, BACH1, ZEB1, TRIM28, FGF9, TBL1XR1, CCL5, CCL3, PDCD4, HBEGF	45	2326	16792	2.40642	0.976107	0.277552	0.276219
GOTERM_BP_ALL	GO:2000113~negative regulation of cellular macromolecule biosynthetic process	11	22.9167	0.00186634	ZEB1, TRIM28, FGF9, TBL1XR1, CBX2, PDCD4, RORB, KLF4, NOC2L, BACH1, HBEGF	45	1324	16792	3.10023	0.979541	0.277552	0.276219
GOTERM_BP_ALL	GO:1901701~cellular response to oxygen-containing compound	9	18.75	0.00227394	ZEB1, ANXA1, CCL5, CCL3, RORB, KLF4, PRKACA, ETS1, ATP6V1C1	45	912	16792	3.68246	0.991259	0.293022	0.291614
GOTERM_BP_ALL	GO:0045892~negative regulation of transcription, DNA-templated	10	20.8333	0.00228087	ZEB1, TRIM28, FGF9, TBL1XR1, CBX2, PDCD4, RORB, KLF4, NOC2L, BACH1	45	1130	16792	3.30226	0.991385	0.293022	0.291614
GOTERM_BP_ALL	GO:0048585~negative regulation of response to stimulus	11	22.9167	0.00239259	ANXA1, FGF9, CCL5, PXDN, PDCD4, LRRC4, KLF4, NOC2L, PRKACA, ETS1, HLA-E	45	1369	16792	2.99833	0.993176	0.293022	0.291614
GOTERM_BP_ALL	GO:1903507~negative regulation of nucleic acid-templated transcription	10	20.8333	0.00300771	ZEB1, TRIM28, FGF9, TBL1XR1, CBX2, PDCD4, RORB, KLF4, NOC2L, BACH1	45	1177	16792	3.1704	0.998111	0.298364	0.296931
GOTERM_BP_ALL	GO:0071310~cellular response to organic substance	14	29.1667	0.00307036	ANXA1, SPARC, LRRC4, RORB, PTPN12, KLF4, HLA-E, ZEB1, FGF9, CCL5, PXDN, CCL3, PRKACA, ATP6V1C1	45	2186	16792	2.38983	0.998342	0.298364	0.296931
GOTERM_BP_ALL	GO:0000122~negative regulation of transcription from RNA polymerase II promoter	8	16.6667	0.0030745	ZEB1, TRIM28, FGF9, TBL1XR1, CBX2, KLF4, NOC2L, BACH1	45	748	16792	3.99097	0.998357	0.298364	0.296931
GOTERM_BP_ALL	GO:0018193~peptidyl-amino acid modification	10	20.8333	0.00314804	COPRS, PRMT7, TRIM28, FGF9, CCL5, CBX2, ST3GAL4, NOC2L, PRKACA, HBEGF	45	1185	16792	3.14899	0.998591	0.298364	0.296931
GOTERM_BP_ALL	GO:0022407~regulation of cell-cell adhesion	6	12.5	0.00325151	ZEB1, ANXA1, CCL5, KLF4, ETS1, HLA-E	45	386	16792	5.80035	0.998865	0.298364	0.296931
GOTERM_BP_ALL	GO:0070555~response to interleukin-1	4	8.33333	0.00329605	ANXA1, CCL5, CCL3, ETS1	45	114	16792	13.0932	0.998965	0.298364	0.296931
GOTERM_BP_ALL	GO:0043009~chordate embryonic development	7	14.5833	0.00372898	RRP7A, RNASEH2B, ZEB1, TRIM28, FGF9, PLCD3, PRKACA	45	577	16792	4.52702	0.999581	0.302486	0.301033
GOTERM_BP_ALL	GO:0006811~ion transport	11	22.9167	0.00378831	SLC36A1, SLC2A9, ANXA1, STIM2, SLCO4A1, CCL5, CCL3, ATP10A, PRKACA, ATP6V1C1, SLC27A5	45	1458	16792	2.8153	0.99963	0.302486	0.301033
GOTERM_BP_ALL	GO:0009892~negative regulation of metabolic process	15	31.25	0.00386571	RNASEH2B, CBX2, LRRC4, RORB, KLF4, NOC2L, BACH1, ZEB1, TRIM28, FGF9, TBL1XR1, CCL5, CCL3, PDCD4, HBEGF	45	2522	16792	2.2194	0.999685	0.302486	0.301033
GOTERM_BP_ALL	GO:0009792~embryo development ending in birth or egg hatching	7	14.5833	0.00392273	RRP7A, RNASEH2B, ZEB1, TRIM28, FGF9, PLCD3, PRKACA	45	583	16792	4.48043	0.999721	0.302486	0.301033
GOTERM_BP_ALL	GO:0060326~cell chemotaxis	5	10.4167	0.00413946	ANXA1, CCL5, CCL3, LYST, HBEGF	45	251	16792	7.43338	0.999822	0.307798	0.30632
GOTERM_BP_ALL	GO:0048522~positive regulation of cellular process	22	45.8333	0.0046826	RNASEH2B, ANXA1, SPARC, RORB, KLF4, ETS1, NAT14, BACH1, HLA-E, ZEB1, TRIM28, FGF9, TBL1XR1, ZMAT3, STIM2, CCL5, CCL3, PDCD4, SYNPO, PRKACA, RAB11FIP4, HBEGF	45	4744	16792	1.73049	0.999943	0.336178	0.334564
GOTERM_BP_ALL	GO:0036211~protein modification process	19	39.5833	0.00532731	PRMT7, ANXA1, CBX2, LRRC4, PTPN12, KLF4, NOC2L, BACH1, KBTBD11, COPRS, TRIM28, FGF9, TBL1XR1, CCL5, CCL3, PDCD4, ST3GAL4, PRKACA, HBEGF	45	3818	16792	1.85698	0.999985	0.348678	0.347004
GOTERM_BP_ALL	GO:0006464~cellular protein modification process	19	39.5833	0.00532731	PRMT7, ANXA1, CBX2, LRRC4, PTPN12, KLF4, NOC2L, BACH1, KBTBD11, COPRS, TRIM28, FGF9, TBL1XR1, CCL5, CCL3, PDCD4, ST3GAL4, PRKACA, HBEGF	45	3818	16792	1.85698	0.999985	0.348678	0.347004
GOTERM_BP_ALL	GO:0044767~single-organism developmental process	24	50	0.00535913	RNASEH2B, ANXA1, SPARC, CBX2, ATP10A, RORB, PTPN12, KLF4, ETS1, RRP7A, COPRS, ZEB1, ADAP2, TRIM28, FGF9, TBL1XR1, CCL3, PDCD4, HIVEP2, PLCD3, MDGA2, PRKACA, RAB11FIP4, HBEGF	45	5475	16792	1.63575	0.999986	0.348678	0.347004
GOTERM_BP_ALL	GO:0031324~negative regulation of cellular metabolic process	14	29.1667	0.00566949	CBX2, LRRC4, RORB, KLF4, NOC2L, BACH1, ZEB1, TRIM28, FGF9, TBL1XR1, CCL5, CCL3, PDCD4, HBEGF	45	2345	16792	2.22779	0.999993	0.350616	0.348932
GOTERM_BP_ALL	GO:0042127~regulation of cell proliferation	11	22.9167	0.00590682	RNASEH2B, SPARC, ZEB1, ANXA1, FGF9, CCL5, KLF4, PLCD3, ETS1, HLA-E, HBEGF	45	1552	16792	2.64479	0.999996	0.350616	0.348932
GOTERM_BP_ALL	GO:0014066~regulation of phosphatidylinositol 3-kinase signaling	4	8.33333	0.00608633	FGF9, CCL5, KLF4, HBEGF	45	142	16792	10.5114	0.999997	0.350616	0.348932
GOTERM_BP_ALL	GO:0043491~protein kinase B signaling	4	8.33333	0.00620549	CCL5, CCL3, KLF4, HBEGF	45	143	16792	10.4379	0.999998	0.350616	0.348932
GOTERM_BP_ALL	GO:0071702~organic substance transport	15	31.25	0.00623092	SLC36A1, ANXA1, ATP10A, LYST, HLA-E, SLC2A9, TRIM28, FGF9, SLCO4A1, ZMAT3, CCL5, CCL3, PRKACA, ATP6V1C1, SLC27A5	45	2657	16792	2.10664	0.999998	0.350616	0.348932
GOTERM_BP_ALL	GO:0009611~response to wounding	7	14.5833	0.00658211	SPARC, ANXA1, PTPN12, KLF4, PRKACA, ETS1, HBEGF	45	649	16792	4.02479	0.999999	0.359322	0.357597
GOTERM_BP_ALL	GO:0060761~negative regulation of response to cytokine stimulus	3	6.25	0.00673082	CCL5, PXDN, KLF4	45	47	16792	23.8184	0.999999	0.359322	0.357597
GOTERM_BP_ALL	GO:0033002~muscle cell proliferation	4	8.33333	0.00774522	FGF9, CCL5, KLF4, HBEGF	45	155	16792	9.62982	1	0.392321	0.390437
GOTERM_BP_ALL	GO:0032502~developmental process	24	50	0.00787568	RNASEH2B, ANXA1, SPARC, CBX2, ATP10A, RORB, PTPN12, KLF4, ETS1, RRP7A, COPRS, ZEB1, ADAP2, TRIM28, FGF9, TBL1XR1, CCL3, PDCD4, HIVEP2, PLCD3, MDGA2, PRKACA, RAB11FIP4, HBEGF	45	5632	16792	1.59015	1	0.392321	0.390437
GOTERM_BP_ALL	GO:0031347~regulation of defense response	7	14.5833	0.00798267	ANXA1, CCL5, CCL3, KLF4, PRKACA, ETS1, HLA-E	45	676	16792	3.86404	1	0.392321	0.390437
GOTERM_BP_ALL	GO:0048519~negative regulation of biological process	21	43.75	0.00816618	RNASEH2B, ANXA1, SPARC, CBX2, LRRC4, RORB, KLF4, NOC2L, ETS1, BACH1, HLA-E, ZEB1, TRIM28, FGF9, TBL1XR1, CCL5, PXDN, CCL3, PDCD4, PRKACA, HBEGF	45	4623	16792	1.69506	1	0.392321	0.390437
GOTERM_BP_ALL	GO:0030334~regulation of cell migration	7	14.5833	0.00849432	SPARC, ANXA1, CCL5, CCL3, KLF4, ETS1, HBEGF	45	685	16792	3.81327	1	0.392321	0.390437
GOTERM_BP_ALL	GO:0014070~response to organic cyclic compound	8	16.6667	0.0086763	SPARC, ANXA1, CCL5, CCL3, RORB, KLF4, PRKACA, ETS1	45	906	16792	3.29497	1	0.392321	0.390437
GOTERM_BP_ALL	GO:0016070~RNA metabolic process	21	43.75	0.00870169	RBM28, RNASEH2B, PRMT7, CBX2, RORB, KLF4, NOC2L, ETS1, NAT14, BACH1, RRP7A, COPRS, ZEB1, TRIM28, FGF9, TBL1XR1, CCL5, CCL3, PDCD4, HIVEP2, PRKACA	45	4648	16792	1.68594	1	0.392321	0.390437
GOTERM_BP_ALL	GO:0007159~leukocyte cell-cell adhesion	6	12.5	0.00889325	ZEB1, ANXA1, CCL5, KLF4, ETS1, HLA-E	45	491	16792	4.55995	1	0.392321	0.390437
GOTERM_BP_ALL	GO:0050727~regulation of inflammatory response	5	10.4167	0.00904486	ANXA1, CCL5, CCL3, KLF4, ETS1	45	314	16792	5.94197	1	0.392321	0.390437
GOTERM_BP_ALL	GO:0010632~regulation of epithelial cell migration	4	8.33333	0.0098039	SPARC, KLF4, ETS1, HBEGF	45	169	16792	8.83208	1	0.400524	0.3986
GOTERM_BP_ALL	GO:0007423~sensory organ development	6	12.5	0.0101296	SPARC, ZEB1, FGF9, RORB, KLF4, RAB11FIP4	45	507	16792	4.41604	1	0.400524	0.3986
GOTERM_BP_ALL	GO:0043412~macromolecule modification	19	39.5833	0.0105248	PRMT7, ANXA1, CBX2, LRRC4, PTPN12, KLF4, NOC2L, BACH1, KBTBD11, COPRS, TRIM28, FGF9, TBL1XR1, CCL5, CCL3, PDCD4, ST3GAL4, PRKACA, HBEGF	45	4065	16792	1.74415	1	0.400524	0.3986
GOTERM_BP_ALL	GO:0010033~response to organic substance	15	31.25	0.0106118	ANXA1, SPARC, LRRC4, RORB, PTPN12, KLF4, ETS1, HLA-E, ZEB1, FGF9, CCL5, PXDN, CCL3, PRKACA, ATP6V1C1	45	2822	16792	1.98346	1	0.400524	0.3986
GOTERM_BP_ALL	GO:0010628~positive regulation of gene expression	11	22.9167	0.0106926	ZEB1, TRIM28, FGF9, TBL1XR1, CCL5, CCL3, RORB, KLF4, ETS1, NAT14, BACH1	45	1692	16792	2.42595	1	0.400524	0.3986
GOTERM_BP_ALL	GO:0048513~animal organ development	16	33.3333	0.0107731	ANXA1, SPARC, RORB, KLF4, ETS1, COPRS, ZEB1, ADAP2, TRIM28, FGF9, TBL1XR1, CCL3, PLCD3, MDGA2, RAB11FIP4, HBEGF	45	3129	16792	1.90811	1	0.400524	0.3986
GOTERM_BP_ALL	GO:0071495~cellular response to endogenous stimulus	9	18.75	0.0109095	ZEB1, ANXA1, FGF9, CCL5, RORB, PTPN12, KLF4, PRKACA, ATP6V1C1	45	1185	16792	2.83409	1	0.400524	0.3986
GOTERM_BP_ALL	GO:0002548~monocyte chemotaxis	3	6.25	0.0111335	ANXA1, CCL5, CCL3	45	61	16792	18.3519	1	0.400524	0.3986
GOTERM_BP_ALL	GO:0001654~eye development	5	10.4167	0.0111635	ZEB1, FGF9, RORB, KLF4, RAB11FIP4	45	334	16792	5.58616	1	0.400524	0.3986
GOTERM_BP_ALL	GO:0071407~cellular response to organic cyclic compound	6	12.5	0.0112181	ANXA1, CCL5, CCL3, RORB, KLF4, PRKACA	45	520	16792	4.30564	1	0.400524	0.3986
GOTERM_BP_ALL	GO:0009790~embryo development	8	16.6667	0.0113501	RRP7A, RNASEH2B, ZEB1, TRIM28, FGF9, KLF4, PLCD3, PRKACA	45	954	16792	3.12919	1	0.400524	0.3986
GOTERM_BP_ALL	GO:2000145~regulation of cell motility	7	14.5833	0.0118522	SPARC, ANXA1, CCL5, CCL3, KLF4, ETS1, HBEGF	45	736	16792	3.54903	1	0.403954	0.402014
GOTERM_BP_ALL	GO:1903825~organic acid transmembrane transport	3	6.25	0.0122045	SLC36A1, SLC2A9, SLC27A5	45	64	16792	17.4917	1	0.403954	0.402014
GOTERM_BP_ALL	GO:0048856~anatomical structure development	23	47.9167	0.0122594	RNASEH2B, ANXA1, SPARC, CBX2, ATP10A, RORB, PTPN12, KLF4, ETS1, RRP7A, COPRS, ZEB1, ADAP2, TRIM28, FGF9, TBL1XR1, CCL3, HIVEP2, PLCD3, MDGA2, PRKACA, RAB11FIP4, HBEGF	45	5473	16792	1.56817	1	0.403954	0.402014
GOTERM_BP_ALL	GO:0048015~phosphatidylinositol-mediated signaling	4	8.33333	0.0123325	FGF9, CCL5, KLF4, HBEGF	45	184	16792	8.11208	1	0.403954	0.402014
GOTERM_BP_ALL	GO:1901700~response to oxygen-containing compound	10	20.8333	0.0124174	SPARC, ZEB1, ANXA1, CCL5, CCL3, RORB, KLF4, PRKACA, ETS1, ATP6V1C1	45	1466	16792	2.5454	1	0.403954	0.402014
GOTERM_BP_ALL	GO:0048017~inositol lipid-mediated signaling	4	8.33333	0.0128791	FGF9, CCL5, KLF4, HBEGF	45	187	16792	7.98194	1	0.405346	0.4034
GOTERM_BP_ALL	GO:0090304~nucleic acid metabolic process	22	45.8333	0.0131551	RBM28, RNASEH2B, PRMT7, ANXA1, CBX2, RORB, KLF4, NOC2L, ETS1, NAT14, BACH1, RRP7A, COPRS, ZEB1, TRIM28, FGF9, TBL1XR1, CCL5, CCL3, PDCD4, HIVEP2, PRKACA	45	5158	16792	1.59159	1	0.405346	0.4034
GOTERM_BP_ALL	GO:0044699~single-organism process	42	87.5	0.0132162	RNASEH2B, SPARC, LRRC4, ATP10A, RORB, NOC2L, ETS1, LYST, BACH1, RRP7A, ADAP2, FGF9, TRIM28, ZMAT3, CCL5, CCL3, ST3GAL4, HIVEP2, SYNPO, PRKACA, ATP6V1C1, RAB11FIP4, SLC36A1, PRMT7, ANXA1, CBX2, PTPN12, KLF4, CABLES2, HLA-E, SLC2A9, COPRS, ZEB1, SLCO4A1, STIM2, TBL1XR1, PXDN, PDCD4, PLCD3, MDGA2, SLC27A5, HBEGF	45	13377	16792	1.1716	1	0.405346	0.4034
GOTERM_BP_ALL	GO:0042060~wound healing	6	12.5	0.013239	SPARC, ANXA1, PTPN12, PRKACA, ETS1, HBEGF	45	542	16792	4.13087	1	0.405346	0.4034
GOTERM_BP_ALL	GO:0016569~covalent chromatin modification	6	12.5	0.0140316	COPRS, PRMT7, TRIM28, TBL1XR1, CBX2, NOC2L	45	550	16792	4.07079	1	0.416078	0.414079
GOTERM_BP_ALL	GO:0030595~leukocyte chemotaxis	4	8.33333	0.0142079	ANXA1, CCL5, CCL3, LYST	45	194	16792	7.69393	1	0.416078	0.414079
GOTERM_BP_ALL	GO:0001503~ossification	5	10.4167	0.014233	SPARC, FGF9, CCL3, RORB, PRKACA	45	359	16792	5.19715	1	0.416078	0.414079
GOTERM_BP_ALL	GO:0040012~regulation of locomotion	7	14.5833	0.0143889	SPARC, ANXA1, CCL5, CCL3, KLF4, ETS1, HBEGF	45	768	16792	3.40116	1	0.416078	0.414079
GOTERM_BP_ALL	GO:0009653~anatomical structure morphogenesis	14	29.1667	0.0146876	ANXA1, SPARC, ATP10A, RORB, KLF4, ETS1, RRP7A, ZEB1, TRIM28, FGF9, CCL3, PLCD3, PRKACA, HBEGF	45	2631	16792	1.98562	1	0.418898	0.416886
GOTERM_BP_ALL	GO:0007275~multicellular organism development	21	43.75	0.0151192	RNASEH2B, ANXA1, SPARC, CBX2, RORB, KLF4, ETS1, RRP7A, COPRS, ZEB1, ADAP2, TRIM28, FGF9, TBL1XR1, CCL3, HIVEP2, PLCD3, MDGA2, PRKACA, RAB11FIP4, HBEGF	45	4877	16792	1.60678	1	0.425381	0.423338
GOTERM_BP_ALL	GO:0043985~histone H4-R3 methylation	2	4.16667	0.0156215	COPRS, PRMT7	45	6	16792	124.385	1	0.433652	0.431569
GOTERM_BP_ALL	GO:0051924~regulation of calcium ion transport	4	8.33333	0.0162373	STIM2, CCL5, CCL3, PRKACA	45	204	16792	7.31678	1	0.441447	0.439326
GOTERM_BP_ALL	GO:0007166~cell surface receptor signaling pathway	14	29.1667	0.0164548	ANXA1, LRRC4, PTPN12, KLF4, HLA-E, ZEB1, FGF9, TBL1XR1, CCL5, PXDN, CCL3, PRKACA, ATP6V1C1, HBEGF	45	2669	16792	1.95735	1	0.441447	0.439326
GOTERM_BP_ALL	GO:0009719~response to endogenous stimulus	10	20.8333	0.0172798	SPARC, ZEB1, ANXA1, FGF9, CCL5, RORB, PTPN12, KLF4, PRKACA, ATP6V1C1	45	1548	16792	2.41057	1	0.441447	0.439326
GOTERM_BP_ALL	GO:0006366~transcription from RNA polymerase II promoter	11	22.9167	0.0172976	ZEB1, TRIM28, FGF9, TBL1XR1, CBX2, RORB, HIVEP2, KLF4, NOC2L, ETS1, BACH1	45	1820	16792	2.25534	1	0.441447	0.439326
GOTERM_BP_ALL	GO:0051270~regulation of cellular component movement	7	14.5833	0.0174799	SPARC, ANXA1, CCL5, CCL3, KLF4, ETS1, HBEGF	45	802	16792	3.25697	1	0.441447	0.439326
GOTERM_BP_ALL	GO:0006955~immune response	10	20.8333	0.0174812	ZEB1, ANXA1, TRIM28, CCL5, PXDN, CCL3, PRKACA, ETS1, LYST, HLA-E	45	1551	16792	2.4059	1	0.441447	0.439326
GOTERM_BP_ALL	GO:0048518~positive regulation of biological process	22	45.8333	0.0174893	RNASEH2B, ANXA1, SPARC, RORB, KLF4, ETS1, NAT14, BACH1, HLA-E, ZEB1, TRIM28, FGF9, TBL1XR1, ZMAT3, STIM2, CCL5, CCL3, PDCD4, SYNPO, PRKACA, RAB11FIP4, HBEGF	45	5285	16792	1.55334	1	0.441447	0.439326
GOTERM_BP_ALL	GO:0070301~cellular response to hydrogen peroxide	3	6.25	0.0177645	ANXA1, KLF4, ETS1	45	78	16792	14.3521	1	0.441447	0.439326
GOTERM_BP_ALL	GO:0031326~regulation of cellular biosynthetic process	19	39.5833	0.0181063	PRMT7, ANXA1, CBX2, RORB, KLF4, NOC2L, ETS1, NAT14, BACH1, COPRS, ZEB1, TRIM28, FGF9, TBL1XR1, CCL5, CCL3, PDCD4, HIVEP2, HBEGF	45	4284	16792	1.65498	1	0.441447	0.439326
GOTERM_BP_ALL	GO:2000503~positive regulation of natural killer cell chemotaxis	2	4.16667	0.0182017	CCL5, CCL3	45	7	16792	106.616	1	0.441447	0.439326
GOTERM_BP_ALL	GO:0048583~regulation of response to stimulus	17	35.4167	0.0182346	RNASEH2B, ANXA1, LRRC4, PTPN12, KLF4, NOC2L, ETS1, HLA-E, ZEB1, TRIM28, FGF9, CCL5, PXDN, CCL3, PDCD4, PRKACA, HBEGF	45	3636	16792	1.74468	1	0.441447	0.439326
GOTERM_BP_ALL	GO:2001141~regulation of RNA biosynthetic process	17	35.4167	0.0186052	PRMT7, CBX2, RORB, KLF4, NOC2L, ETS1, NAT14, BACH1, COPRS, ZEB1, TRIM28, FGF9, TBL1XR1, CCL5, CCL3, PDCD4, HIVEP2	45	3644	16792	1.74085	1	0.444766	0.44263
GOTERM_BP_ALL	GO:0048523~negative regulation of cellular process	19	39.5833	0.018799	ANXA1, SPARC, CBX2, LRRC4, RORB, KLF4, NOC2L, ETS1, BACH1, ZEB1, TRIM28, FGF9, TBL1XR1, CCL5, PXDN, CCL3, PDCD4, PRKACA, HBEGF	45	4300	16792	1.64883	1	0.444766	0.44263
GOTERM_BP_ALL	GO:1903039~positive regulation of leukocyte cell-cell adhesion	4	8.33333	0.0193398	ANXA1, CCL5, ETS1, HLA-E	45	218	16792	6.84689	1	0.451184	0.449017
GOTERM_BP_ALL	GO:0030335~positive regulation of cell migration	5	10.4167	0.0195246	SPARC, CCL5, CCL3, ETS1, HBEGF	45	395	16792	4.72349	1	0.451184	0.449017
GOTERM_BP_ALL	GO:2000106~regulation of leukocyte apoptotic process	3	6.25	0.0199656	ANXA1, CCL5, NOC2L	45	83	16792	13.4876	1	0.451184	0.449017
GOTERM_BP_ALL	GO:0006950~response to stress	17	35.4167	0.0201977	RNASEH2B, ANXA1, SPARC, PTPN12, KLF4, ETS1, LYST, BACH1, HLA-E, TRIM28, ZMAT3, CCL5, PXDN, CCL3, PDCD4, PRKACA, HBEGF	45	3677	16792	1.72522	1	0.451184	0.449017
GOTERM_BP_ALL	GO:0009889~regulation of biosynthetic process	19	39.5833	0.0205767	PRMT7, ANXA1, CBX2, RORB, KLF4, NOC2L, ETS1, NAT14, BACH1, COPRS, ZEB1, TRIM28, FGF9, TBL1XR1, CCL5, CCL3, PDCD4, HIVEP2, HBEGF	45	4339	16792	1.63401	1	0.451184	0.449017
GOTERM_BP_ALL	GO:0031349~positive regulation of defense response	5	10.4167	0.0206778	CCL5, CCL3, PRKACA, ETS1, HLA-E	45	402	16792	4.64124	1	0.451184	0.449017
GOTERM_BP_ALL	GO:0010468~regulation of gene expression	19	39.5833	0.0208617	RNASEH2B, PRMT7, CBX2, RORB, KLF4, NOC2L, ETS1, NAT14, BACH1, COPRS, ZEB1, TRIM28, FGF9, TBL1XR1, CCL5, CCL3, PDCD4, HIVEP2, PRKACA	45	4345	16792	1.63175	1	0.451184	0.449017
GOTERM_BP_ALL	GO:0045087~innate immune response	7	14.5833	0.0210062	ANXA1, TRIM28, CCL5, CCL3, PRKACA, LYST, HLA-E	45	836	16792	3.12451	1	0.451184	0.449017
GOTERM_BP_ALL	GO:0071363~cellular response to growth factor stimulus	6	12.5	0.0210206	SPARC, ZEB1, FGF9, CCL5, PTPN12, KLF4	45	610	16792	3.67038	1	0.451184	0.449017
GOTERM_BP_ALL	GO:0010631~epithelial cell migration	4	8.33333	0.0217438	SPARC, KLF4, ETS1, HBEGF	45	228	16792	6.54659	1	0.455432	0.453244
GOTERM_BP_ALL	GO:2000147~positive regulation of cell motility	5	10.4167	0.0218725	SPARC, CCL5, CCL3, ETS1, HBEGF	45	409	16792	4.5618	1	0.455432	0.453244
GOTERM_BP_ALL	GO:0009968~negative regulation of signal transduction	8	16.6667	0.0220701	FGF9, CCL5, PXDN, PDCD4, LRRC4, KLF4, NOC2L, PRKACA	45	1089	16792	2.74127	1	0.455432	0.453244
GOTERM_BP_ALL	GO:0008284~positive regulation of cell proliferation	7	14.5833	0.0224749	RNASEH2B, ANXA1, FGF9, CCL5, ETS1, HLA-E, HBEGF	45	849	16792	3.07667	1	0.455432	0.453244
GOTERM_BP_ALL	GO:0090132~epithelium migration	4	8.33333	0.0224956	SPARC, KLF4, ETS1, HBEGF	45	231	16792	6.46157	1	0.455432	0.453244
GOTERM_BP_ALL	GO:0001525~angiogenesis	5	10.4167	0.022574	SPARC, FGF9, KLF4, PLCD3, ETS1	45	413	16792	4.51762	1	0.455432	0.453244
GOTERM_BP_ALL	GO:1903901~negative regulation of viral life cycle	3	6.25	0.0227497	TRIM28, CCL5, CCL3	45	89	16792	12.5783	1	0.455432	0.453244
GOTERM_BP_ALL	GO:0033993~response to lipid	7	14.5833	0.0237714	SPARC, ANXA1, CCL5, CCL3, RORB, KLF4, ETS1	45	860	16792	3.03731	1	0.465131	0.462897
GOTERM_BP_ALL	GO:0051272~positive regulation of cellular component movement	5	10.4167	0.0238346	SPARC, CCL5, CCL3, ETS1, HBEGF	45	420	16792	4.44233	1	0.465131	0.462897
GOTERM_BP_ALL	GO:0090130~tissue migration	4	8.33333	0.0240417	SPARC, KLF4, ETS1, HBEGF	45	237	16792	6.29798	1	0.465131	0.462897
GOTERM_BP_ALL	GO:0040017~positive regulation of locomotion	5	10.4167	0.0242025	SPARC, CCL5, CCL3, ETS1, HBEGF	45	422	16792	4.42127	1	0.465131	0.462897
GOTERM_BP_ALL	GO:0070848~response to growth factor	6	12.5	0.0243615	SPARC, ZEB1, FGF9, CCL5, PTPN12, KLF4	45	634	16792	3.53144	1	0.465131	0.462897
GOTERM_BP_ALL	GO:0003006~developmental process involved in reproduction	6	12.5	0.0246546	ANXA1, TRIM28, FGF9, CBX2, PLCD3, PRKACA	45	636	16792	3.52034	1	0.465131	0.462897
GOTERM_BP_ALL	GO:0051252~regulation of RNA metabolic process	17	35.4167	0.024798	PRMT7, CBX2, RORB, KLF4, NOC2L, ETS1, NAT14, BACH1, COPRS, ZEB1, TRIM28, FGF9, TBL1XR1, CCL5, CCL3, PDCD4, HIVEP2	45	3762	16792	1.68624	1	0.465131	0.462897
GOTERM_BP_ALL	GO:0030155~regulation of cell adhesion	6	12.5	0.0256986	ZEB1, ANXA1, CCL5, KLF4, ETS1, HLA-E	45	643	16792	3.48201	1	0.468957	0.466704
GOTERM_BP_ALL	GO:0010556~regulation of macromolecule biosynthetic process	18	37.5	0.0258173	PRMT7, CBX2, RORB, KLF4, NOC2L, ETS1, NAT14, BACH1, COPRS, ZEB1, TRIM28, FGF9, TBL1XR1, CCL5, CCL3, PDCD4, HIVEP2, HBEGF	45	4107	16792	1.63545	1	0.468957	0.466704
GOTERM_BP_ALL	GO:2000501~regulation of natural killer cell chemotaxis	2	4.16667	0.025903	CCL5, CCL3	45	10	16792	74.6311	1	0.468957	0.466704
GOTERM_BP_ALL	GO:1904994~regulation of leukocyte adhesion to vascular endothelial cell	2	4.16667	0.025903	KLF4, ETS1	45	10	16792	74.6311	1	0.468957	0.466704
GOTERM_BP_ALL	GO:0042221~response to chemical	18	37.5	0.0264062	ANXA1, SPARC, LRRC4, RORB, PTPN12, KLF4, ETS1, LYST, BACH1, HLA-E, ZEB1, FGF9, CCL5, PXDN, CCL3, PRKACA, ATP6V1C1, HBEGF	45	4117	16792	1.63148	1	0.473945	0.471669
GOTERM_BP_ALL	GO:0051716~cellular response to stimulus	26	54.1667	0.0266395	RNASEH2B, SPARC, LRRC4, RORB, NOC2L, ETS1, LYST, BACH1, FGF9, TRIM28, ZMAT3, CCL5, CCL3, HIVEP2, PRKACA, ATP6V1C1, ANXA1, PTPN12, KLF4, HLA-E, ZEB1, TBL1XR1, PXDN, PDCD4, PLCD3, HBEGF	45	6927	16792	1.40061	1	0.474046	0.471769
GOTERM_BP_ALL	GO:0022409~positive regulation of cell-cell adhesion	4	8.33333	0.0270233	ANXA1, CCL5, ETS1, HLA-E	45	248	16792	6.01864	1	0.476005	0.473719
GOTERM_BP_ALL	GO:0042102~positive regulation of T cell proliferation	3	6.25	0.0272068	ANXA1, CCL5, HLA-E	45	98	16792	11.4231	1	0.476005	0.473719
GOTERM_BP_ALL	GO:0051179~localization	23	47.9167	0.028454	SLC36A1, ANXA1, SPARC, LRRC4, ATP10A, KLF4, NOC2L, ETS1, LYST, HLA-E, SLC2A9, TRIM28, FGF9, SLCO4A1, ZMAT3, STIM2, CCL5, CCL3, PRKACA, ATP6V1C1, SLC27A5, RAB11FIP4, HBEGF	45	5872	16792	1.46161	1	0.486029	0.483694
GOTERM_BP_ALL	GO:0048245~eosinophil chemotaxis	2	4.16667	0.0284569	CCL5, CCL3	45	11	16792	67.8465	1	0.486029	0.483694
GOTERM_BP_ALL	GO:1901652~response to peptide	5	10.4167	0.0284801	SPARC, ANXA1, KLF4, PRKACA, ATP6V1C1	45	444	16792	4.2022	1	0.486029	0.483694
GOTERM_BP_ALL	GO:0071887~leukocyte apoptotic process	3	6.25	0.0292921	ANXA1, CCL5, NOC2L	45	102	16792	10.9752	1	0.495822	0.49344
GOTERM_BP_ALL	GO:0071621~granulocyte chemotaxis	3	6.25	0.0298231	ANXA1, CCL5, CCL3	45	103	16792	10.8686	1	0.50074	0.498335
GOTERM_BP_ALL	GO:0010634~positive regulation of epithelial cell migration	3	6.25	0.0308968	SPARC, ETS1, HBEGF	45	105	16792	10.6616	1	0.504305	0.501883
GOTERM_BP_ALL	GO:0051928~positive regulation of calcium ion transport	3	6.25	0.0308968	STIM2, CCL5, CCL3	45	105	16792	10.6616	1	0.504305	0.501883
GOTERM_BP_ALL	GO:0034969~histone arginine methylation	2	4.16667	0.0310043	COPRS, PRMT7	45	12	16792	62.1926	1	0.504305	0.501883
GOTERM_BP_ALL	GO:0035747~natural killer cell chemotaxis	2	4.16667	0.0310043	CCL5, CCL3	45	12	16792	62.1926	1	0.504305	0.501883
GOTERM_BP_ALL	GO:0051050~positive regulation of transport	7	14.5833	0.0317433	ANXA1, TRIM28, STIM2, CCL5, CCL3, PRKACA, HLA-E	45	920	16792	2.83923	1	0.512321	0.509861
GOTERM_BP_ALL	GO:0048525~negative regulation of viral process	3	6.25	0.0325359	TRIM28, CCL5, CCL3	45	108	16792	10.3654	1	0.512372	0.509911
GOTERM_BP_ALL	GO:0010648~negative regulation of cell communication	8	16.6667	0.0326996	FGF9, CCL5, PXDN, PDCD4, LRRC4, KLF4, NOC2L, PRKACA	45	1182	16792	2.52559	1	0.512372	0.509911
GOTERM_BP_ALL	GO:0031328~positive regulation of cellular biosynthetic process	10	20.8333	0.0328411	ZEB1, ANXA1, TRIM28, TBL1XR1, CCL5, RORB, KLF4, ETS1, NAT14, BACH1	45	1729	16792	2.15822	1	0.512372	0.509911
GOTERM_BP_ALL	GO:0016477~cell migration	8	16.6667	0.0329606	SPARC, ANXA1, CCL5, CCL3, KLF4, ETS1, LYST, HBEGF	45	1184	16792	2.52132	1	0.512372	0.509911
GOTERM_BP_ALL	GO:0048659~smooth muscle cell proliferation	3	6.25	0.0330898	CCL5, KLF4, HBEGF	45	109	16792	10.2703	1	0.512372	0.509911
GOTERM_BP_ALL	GO:0023057~negative regulation of signaling	8	16.6667	0.033223	FGF9, CCL5, PXDN, PDCD4, LRRC4, KLF4, NOC2L, PRKACA	45	1186	16792	2.51707	1	0.512372	0.509911
GOTERM_BP_ALL	GO:0043922~negative regulation by host of viral transcription	2	4.16667	0.0335452	CCL5, CCL3	45	13	16792	57.4085	1	0.513538	0.511071
GOTERM_BP_ALL	GO:0051128~regulation of cellular component organization	12	25	0.0339413	SPARC, ANXA1, TRIM28, LRRC4, CCL3, ATP10A, SYNPO, KLF4, NOC2L, PRKACA, ETS1, HBEGF	45	2323	16792	1.92762	1	0.515809	0.513331
GOTERM_BP_ALL	GO:0032774~RNA biosynthetic process	17	35.4167	0.0343377	PRMT7, CBX2, RORB, KLF4, NOC2L, ETS1, NAT14, BACH1, COPRS, ZEB1, TRIM28, FGF9, TBL1XR1, CCL5, CCL3, PDCD4, HIVEP2	45	3905	16792	1.62449	1	0.518051	0.515563
GOTERM_BP_ALL	GO:0048660~regulation of smooth muscle cell proliferation	3	6.25	0.0353422	CCL5, KLF4, HBEGF	45	113	16792	9.90678	1	0.52759	0.525056
GOTERM_BP_ALL	GO:0009888~tissue development	10	20.8333	0.0358141	ZEB1, ANXA1, TRIM28, FGF9, TBL1XR1, CCL3, PTPN12, KLF4, PRKACA, HBEGF	45	1756	16792	2.12503	1	0.52759	0.525056
GOTERM_BP_ALL	GO:0097530~granulocyte migration	3	6.25	0.0359145	ANXA1, CCL5, CCL3	45	114	16792	9.81988	1	0.52759	0.525056
GOTERM_BP_ALL	GO:0001101~response to acid chemical	4	8.33333	0.0361184	SPARC, ZEB1, RORB, KLF4	45	278	16792	5.36914	1	0.52759	0.525056
GOTERM_BP_ALL	GO:0009891~positive regulation of biosynthetic process	10	20.8333	0.0362702	ZEB1, ANXA1, TRIM28, TBL1XR1, CCL5, RORB, KLF4, ETS1, NAT14, BACH1	45	1760	16792	2.1202	1	0.52759	0.525056
GOTERM_BP_ALL	GO:0010594~regulation of endothelial cell migration	3	6.25	0.0364903	SPARC, KLF4, ETS1	45	115	16792	9.73449	1	0.52759	0.525056
GOTERM_BP_ALL	GO:1902578~single-organism localization	16	33.3333	0.037243	SLC36A1, ANXA1, SPARC, LRRC4, ATP10A, HLA-E, SLC2A9, TRIM28, FGF9, SLCO4A1, STIM2, CCL5, CCL3, PRKACA, ATP6V1C1, SLC27A5	45	3614	16792	1.65204	1	0.532254	0.529698
GOTERM_BP_ALL	GO:0010467~gene expression	21	43.75	0.0373243	RBM28, RNASEH2B, PRMT7, CBX2, RORB, KLF4, NOC2L, ETS1, NAT14, BACH1, RRP7A, COPRS, ZEB1, TRIM28, FGF9, TBL1XR1, CCL5, CCL3, PDCD4, HIVEP2, PRKACA	45	5306	16792	1.47687	1	0.532254	0.529698
GOTERM_BP_ALL	GO:0050729~positive regulation of inflammatory response	3	6.25	0.0376528	CCL5, CCL3, ETS1	45	117	16792	9.56809	1	0.532322	0.529766
GOTERM_BP_ALL	GO:0034220~ion transmembrane transport	7	14.5833	0.0384359	SLC36A1, STIM2, CCL3, ATP10A, PRKACA, ATP6V1C1, SLC27A5	45	963	16792	2.71245	1	0.532322	0.529766
GOTERM_BP_ALL	GO:0032717~negative regulation of interleukin-8 production	2	4.16667	0.0386074	ANXA1, KLF4	45	15	16792	49.7541	1	0.532322	0.529766
GOTERM_BP_ALL	GO:0072677~eosinophil migration	2	4.16667	0.0386074	CCL5, CCL3	45	15	16792	49.7541	1	0.532322	0.529766
GOTERM_BP_ALL	GO:0034616~response to laminar fluid shear stress	2	4.16667	0.0386074	KLF4, ETS1	45	15	16792	49.7541	1	0.532322	0.529766
GOTERM_BP_ALL	GO:0048514~blood vessel morphogenesis	5	10.4167	0.0390582	SPARC, FGF9, KLF4, PLCD3, ETS1	45	491	16792	3.79995	1	0.53487	0.532301
GOTERM_BP_ALL	GO:0043010~camera-type eye development	4	8.33333	0.0394606	ZEB1, RORB, KLF4, RAB11FIP4	45	288	16792	5.18272	1	0.53487	0.532301
GOTERM_BP_ALL	GO:0016337~single organismal cell-cell adhesion	6	12.5	0.0400936	ZEB1, ANXA1, CCL5, KLF4, ETS1, HLA-E	45	725	16792	3.08818	1	0.53487	0.532301
GOTERM_BP_ALL	GO:0006812~cation transport	7	14.5833	0.0404553	SLC36A1, SLC2A9, STIM2, CCL5, CCL3, PRKACA, ATP6V1C1	45	975	16792	2.67907	1	0.53487	0.532301
GOTERM_BP_ALL	GO:0051726~regulation of cell cycle	7	14.5833	0.0406266	RNASEH2B, ANXA1, PDCD4, PRKACA, ETS1, CABLES2, RAB11FIP4	45	976	16792	2.67632	1	0.53487	0.532301
GOTERM_BP_ALL	GO:0006810~transport	19	39.5833	0.0410586	SLC36A1, ANXA1, SPARC, ATP10A, NOC2L, LYST, HLA-E, SLC2A9, TRIM28, FGF9, SLCO4A1, ZMAT3, STIM2, CCL5, CCL3, PRKACA, ATP6V1C1, SLC27A5, RAB11FIP4	45	4663	16792	1.52047	1	0.53487	0.532301
GOTERM_BP_ALL	GO:0018216~peptidyl-arginine methylation	2	4.16667	0.0411288	COPRS, PRMT7	45	16	16792	46.6444	1	0.53487	0.532301
GOTERM_BP_ALL	GO:0015849~organic acid transport	3	6.25	0.0412246	SLC36A1, SLC2A9, SLC27A5	45	123	16792	9.10136	1	0.53487	0.532301
GOTERM_BP_ALL	GO:2000112~regulation of cellular macromolecule biosynthetic process	17	35.4167	0.0412919	PRMT7, CBX2, RORB, KLF4, NOC2L, ETS1, NAT14, BACH1, COPRS, ZEB1, TRIM28, FGF9, TBL1XR1, CCL5, PDCD4, HIVEP2, HBEGF	45	3991	16792	1.58949	1	0.53487	0.532301
GOTERM_BP_ALL	GO:0006952~defense response	9	18.75	0.0413645	ANXA1, TRIM28, CCL5, CCL3, KLF4, PRKACA, ETS1, LYST, HLA-E	45	1518	16792	2.21238	1	0.53487	0.532301
GOTERM_BP_ALL	GO:0034614~cellular response to reactive oxygen species	3	6.25	0.0424428	ANXA1, KLF4, ETS1	45	125	16792	8.95573	1	0.53487	0.532301
GOTERM_BP_ALL	GO:0042542~response to hydrogen peroxide	3	6.25	0.0424428	ANXA1, KLF4, ETS1	45	125	16792	8.95573	1	0.53487	0.532301
GOTERM_BP_ALL	GO:0051093~negative regulation of developmental process	6	12.5	0.0429624	SPARC, ZEB1, ANXA1, CCL3, KLF4, PRKACA	45	739	16792	3.02968	1	0.53487	0.532301
GOTERM_BP_ALL	GO:0051896~regulation of protein kinase B signaling	3	6.25	0.0430569	CCL3, KLF4, HBEGF	45	126	16792	8.88466	1	0.53487	0.532301
GOTERM_BP_ALL	GO:0050863~regulation of T cell activation	4	8.33333	0.0433139	ZEB1, ANXA1, CCL5, HLA-E	45	299	16792	4.99205	1	0.53487	0.532301
GOTERM_BP_ALL	GO:0071396~cellular response to lipid	5	10.4167	0.0436363	ANXA1, CCL5, CCL3, RORB, KLF4	45	509	16792	3.66558	1	0.53487	0.532301
GOTERM_BP_ALL	GO:0006925~inflammatory cell apoptotic process	2	4.16667	0.0436437	ANXA1, CCL5	45	17	16792	43.9007	1	0.53487	0.532301
GOTERM_BP_ALL	GO:0044849~estrous cycle	2	4.16667	0.0436437	ANXA1, ETS1	45	17	16792	43.9007	1	0.53487	0.532301
GOTERM_BP_ALL	GO:0051098~regulation of binding	4	8.33333	0.0436733	PRMT7, TRIM28, KLF4, PRKACA	45	300	16792	4.97541	1	0.53487	0.532301
GOTERM_BP_ALL	GO:0051223~regulation of protein transport	6	12.5	0.0444428	ANXA1, TRIM28, CCL5, CCL3, PRKACA, HLA-E	45	746	16792	3.00125	1	0.541111	0.538512
GOTERM_BP_ALL	GO:0045595~regulation of cell differentiation	9	18.75	0.0450374	ZEB1, ANXA1, FGF9, PDCD4, CCL3, RORB, KLF4, PRKACA, ETS1	45	1544	16792	2.17513	1	0.545162	0.542544
GOTERM_BP_ALL	GO:0010818~T cell chemotaxis	2	4.16667	0.0461522	CCL5, CCL3	45	18	16792	41.4617	1	0.553545	0.550886
GOTERM_BP_ALL	GO:0007165~signal transduction	22	45.8333	0.0462617	ANXA1, SPARC, LRRC4, RORB, PTPN12, KLF4, NOC2L, HLA-E, ZEB1, TRIM28, FGF9, TBL1XR1, ZMAT3, CCL5, PXDN, CCL3, PDCD4, HIVEP2, PLCD3, PRKACA, ATP6V1C1, HBEGF	45	5775	16792	1.42154	1	0.553545	0.550886
GOTERM_BP_ALL	GO:0050671~positive regulation of lymphocyte proliferation	3	6.25	0.0468115	ANXA1, CCL5, HLA-E	45	132	16792	8.48081	1	0.553831	0.551171
GOTERM_BP_ALL	GO:0032946~positive regulation of mononuclear cell proliferation	3	6.25	0.0474487	ANXA1, CCL5, HLA-E	45	133	16792	8.41704	1	0.553831	0.551171
GOTERM_BP_ALL	GO:1901360~organic cyclic compound metabolic process	23	47.9167	0.0475164	RBM28, RNASEH2B, PRMT7, ANXA1, CBX2, RORB, KLF4, NOC2L, ETS1, NAT14, BACH1, RRP7A, COPRS, ZEB1, TRIM28, FGF9, TBL1XR1, CCL5, CCL3, PDCD4, HIVEP2, PRKACA, SLC27A5	45	6149	16792	1.39577	1	0.553831	0.551171
GOTERM_BP_ALL	GO:0006139~nucleobase-containing compound metabolic process	22	45.8333	0.0478591	RBM28, RNASEH2B, PRMT7, ANXA1, CBX2, RORB, KLF4, NOC2L, ETS1, NAT14, BACH1, RRP7A, COPRS, ZEB1, TRIM28, FGF9, TBL1XR1, CCL5, CCL3, PDCD4, HIVEP2, PRKACA	45	5794	16792	1.41688	1	0.553831	0.551171
GOTERM_BP_ALL	GO:0071346~cellular response to interferon-gamma	3	6.25	0.0487327	CCL5, CCL3, HLA-E	45	135	16792	8.29235	1	0.553831	0.551171
GOTERM_BP_ALL	GO:0015031~protein transport	10	20.8333	0.0490363	ANXA1, TRIM28, FGF9, ZMAT3, CCL5, CCL3, PRKACA, LYST, ATP6V1C1, HLA-E	45	1860	16792	2.00621	1	0.553831	0.551171
GOTERM_BP_ALL	GO:0008283~cell proliferation	10	20.8333	0.0491776	RNASEH2B, SPARC, ZEB1, ANXA1, FGF9, CCL5, KLF4, ETS1, HLA-E, HBEGF	45	1861	16792	2.00513	1	0.553831	0.551171
GOTERM_BP_ALL	GO:0044765~single-organism transport	15	31.25	0.0491804	SLC36A1, ANXA1, SPARC, ATP10A, HLA-E, SLC2A9, TRIM28, FGF9, SLCO4A1, STIM2, CCL5, CCL3, PRKACA, ATP6V1C1, SLC27A5	45	3415	16792	1.63904	1	0.553831	0.551171
GOTERM_BP_ALL	GO:0006325~chromatin organization	6	12.5	0.0492966	COPRS, PRMT7, TRIM28, TBL1XR1, CBX2, NOC2L	45	768	16792	2.91528	1	0.553831	0.551171

## Sheet: SUPER.EA24
Category	Term	Count	%	PValue	Genes	List Total	Pop Hits	Pop Total	Fold Enrichment	Bonferroni	Benjamini	FDR
GOTERM_BP_ALL	GO:0032502~developmental process	32	55.1724	0.000265705	RNASEH2B, SPARC, ATP10A, VLDLR, RORB, HDAC6, AFF2, RRP7A, ADAP2, TCOF1, CCL3, HIVEP2, PRKACA, RAB11FIP4, PDGFRB, HEXIM1, ANXA1, PCDH9, NCOA4, PTPN12, KLF4, QKI, COPRS, FMNL1, ZEB1, FMNL2, CDK6, TBL1XR1, PDCD4, PLCD3, MDGA2, FGF13	55	5632	16792	1.73471	0.458455	0.308906	0.308103
GOTERM_BP_ALL	GO:0048856~anatomical structure development	31	53.4483	0.000411831	RNASEH2B, SPARC, ATP10A, VLDLR, RORB, HDAC6, AFF2, RRP7A, ADAP2, TCOF1, CCL3, HIVEP2, PRKACA, RAB11FIP4, PDGFRB, HEXIM1, ANXA1, PCDH9, NCOA4, PTPN12, KLF4, QKI, COPRS, FMNL1, ZEB1, FMNL2, CDK6, TBL1XR1, PLCD3, MDGA2, FGF13	55	5473	16792	1.72932	0.61353	0.308906	0.308103
GOTERM_BP_ALL	GO:0044767~single-organism developmental process	31	53.4483	0.000414738	RNASEH2B, SPARC, ATP10A, VLDLR, RORB, HDAC6, AFF2, RRP7A, ADAP2, TCOF1, CCL3, HIVEP2, PRKACA, RAB11FIP4, PDGFRB, HEXIM1, ANXA1, PCDH9, NCOA4, PTPN12, KLF4, QKI, COPRS, FMNL1, ZEB1, CDK6, TBL1XR1, PDCD4, PLCD3, MDGA2, FGF13	55	5475	16792	1.72869	0.616116	0.308906	0.308103
GOTERM_BP_ALL	GO:0010629~negative regulation of gene expression	14	24.1379	0.00067869	HEXIM1, RNASEH2B, VLDLR, RORB, KLF4, NOC2L, BACH1, QKI, HDAC6, ZEB1, TBL1XR1, CCL5, CCL3, PDCD4	55	1485	16792	2.87833	0.791319	0.308906	0.308103
GOTERM_BP_ALL	GO:0071310~cellular response to organic substance	17	29.3103	0.00103697	PDGFRB, ANXA1, SPARC, NCOA4, LRRC4, RORB, PTPN12, KLF4, HDAC6, HLA-E, ZEB1, CDK6, CCL5, PXDN, CCL3, PRKACA, ATP6V1C1	55	2186	16792	2.37432	0.908788	0.308906	0.308103
GOTERM_BP_ALL	GO:0070887~cellular response to chemical stimulus	19	32.7586	0.00108966	PDGFRB, ANXA1, SPARC, NCOA4, LRRC4, RORB, PTPN12, KLF4, LYST, BACH1, HDAC6, HLA-E, ZEB1, CDK6, CCL5, PXDN, CCL3, PRKACA, ATP6V1C1	55	2648	16792	2.19066	0.919243	0.308906	0.308103
GOTERM_BP_ALL	GO:0071396~cellular response to lipid	8	13.7931	0.00116394	ANXA1, CDK6, CCL5, NCOA4, CCL3, RORB, KLF4, HDAC6	55	509	16792	4.79857	0.931979	0.308906	0.308103
GOTERM_BP_ALL	GO:1902679~negative regulation of RNA biosynthetic process	12	20.6897	0.0012566	HEXIM1, ZEB1, TBL1XR1, CCL5, PDCD4, CCL3, RORB, VLDLR, KLF4, NOC2L, BACH1, HDAC6	55	1194	16792	3.06843	0.94509	0.308906	0.308103
GOTERM_BP_ALL	GO:0071407~cellular response to organic cyclic compound	8	13.7931	0.00131688	ANXA1, CCL5, NCOA4, CCL3, RORB, KLF4, PRKACA, HDAC6	55	520	16792	4.69706	0.952231	0.308906	0.308103
GOTERM_BP_ALL	GO:0010558~negative regulation of macromolecule biosynthetic process	13	22.4138	0.00152643	HEXIM1, VLDLR, RORB, KLF4, NOC2L, BACH1, QKI, HDAC6, ZEB1, TBL1XR1, CCL5, CCL3, PDCD4	55	1418	16792	2.79903	0.970569	0.308906	0.308103
GOTERM_BP_ALL	GO:0033993~response to lipid	10	17.2414	0.00154918	PDGFRB, SPARC, ANXA1, CDK6, CCL5, NCOA4, CCL3, RORB, KLF4, HDAC6	55	860	16792	3.55011	0.972076	0.308906	0.308103
GOTERM_BP_ALL	GO:0051253~negative regulation of RNA metabolic process	12	20.6897	0.0017045	HEXIM1, ZEB1, TBL1XR1, CCL5, PDCD4, CCL3, RORB, VLDLR, KLF4, NOC2L, BACH1, HDAC6	55	1240	16792	2.9546	0.9805	0.308906	0.308103
GOTERM_BP_ALL	GO:0031327~negative regulation of cellular biosynthetic process	13	22.4138	0.00219706	HEXIM1, VLDLR, RORB, KLF4, NOC2L, BACH1, QKI, HDAC6, ZEB1, TBL1XR1, CCL5, CCL3, PDCD4	55	1480	16792	2.68177	0.993758	0.308906	0.308103
GOTERM_BP_ALL	GO:0014070~response to organic cyclic compound	10	17.2414	0.00221526	PDGFRB, SPARC, ANXA1, CCL5, NCOA4, CCL3, RORB, KLF4, PRKACA, HDAC6	55	906	16792	3.36986	0.994015	0.308906	0.308103
GOTERM_BP_ALL	GO:0007275~multicellular organism development	27	46.5517	0.00229239	RNASEH2B, SPARC, VLDLR, RORB, HDAC6, AFF2, RRP7A, ADAP2, TCOF1, CCL3, HIVEP2, PRKACA, RAB11FIP4, PDGFRB, HEXIM1, ANXA1, PCDH9, NCOA4, KLF4, QKI, COPRS, ZEB1, CDK6, TBL1XR1, PLCD3, MDGA2, FGF13	55	4877	16792	1.69025	0.994993	0.308906	0.308103
GOTERM_BP_ALL	GO:1901701~cellular response to oxygen-containing compound	10	17.2414	0.0023169	ZEB1, ANXA1, CDK6, CCL5, CCL3, RORB, KLF4, PRKACA, ATP6V1C1, HDAC6	55	912	16792	3.34769	0.995269	0.308906	0.308103
GOTERM_BP_ALL	GO:0044699~single-organism process	52	89.6552	0.00239518	SPARC, LRRC4, VLDLR, RORB, NOC2L, BACH1, LYST, AFF2, RPS11, PRKACA, SYNPO, SLC36A1, PDGFRB, ANXA1, PRMT7, NCOA4, HLA-E, ZEB1, STIM2, SLCO4A1, TBL1XR1, PXDN, RNASEH2B, ATP10A, AOAH, HDAC6, RRP7A, ADAP2, TCOF1, ZMAT3, CCL5, CCL3, HIVEP2, ATP6V1C1, RAB11FIP4, HEXIM1, NDUFA6, GK, PCDH9, PTPN12, KLF4, CABLES2, QKI, SLC2A9, COPRS, FMNL1, FMNL2, CDK6, PDCD4, PLCD3, MDGA2, FGF13	55	13377	16792	1.18682	0.996053	0.308906	0.308103
GOTERM_BP_ALL	GO:0009890~negative regulation of biosynthetic process	13	22.4138	0.00251488	HEXIM1, VLDLR, RORB, KLF4, NOC2L, BACH1, QKI, HDAC6, ZEB1, TBL1XR1, CCL5, CCL3, PDCD4	55	1504	16792	2.63897	0.997007	0.308906	0.308103
GOTERM_BP_ALL	GO:0051172~negative regulation of nitrogen compound metabolic process	13	22.4138	0.00254299	HEXIM1, VLDLR, RORB, KLF4, NOC2L, BACH1, QKI, HDAC6, ZEB1, TBL1XR1, CCL5, CCL3, PDCD4	55	1506	16792	2.63547	0.997196	0.308906	0.308103
GOTERM_BP_ALL	GO:0048513~animal organ development	20	34.4828	0.0029447	PDGFRB, HEXIM1, ANXA1, SPARC, PCDH9, NCOA4, VLDLR, RORB, KLF4, AFF2, COPRS, ZEB1, ADAP2, CDK6, TBL1XR1, CCL3, PLCD3, MDGA2, FGF13, RAB11FIP4	55	3129	16792	1.95148	0.998893	0.339818	0.338935
GOTERM_BP_ALL	GO:0043549~regulation of kinase activity	9	15.5172	0.00348058	HEXIM1, PDGFRB, CCL5, PDCD4, LRRC4, VLDLR, FGF13, KLF4, PRKACA	55	788	16792	3.48703	0.99968	0.369523	0.368563
GOTERM_BP_ALL	GO:0045934~negative regulation of nucleobase-containing compound metabolic process	12	20.6897	0.0037457	HEXIM1, ZEB1, TBL1XR1, CCL5, PDCD4, CCL3, RORB, VLDLR, KLF4, NOC2L, BACH1, HDAC6	55	1371	16792	2.67229	0.999827	0.369523	0.368563
GOTERM_BP_ALL	GO:0051270~regulation of cellular component movement	9	15.5172	0.00387343	PDGFRB, SPARC, ANXA1, CDK6, CCL5, CCL3, FGF13, KLF4, HDAC6	55	802	16792	3.42616	0.999871	0.369523	0.368563
GOTERM_BP_ALL	GO:0009636~response to toxic substance	5	8.62069	0.00401962	PDGFRB, CCL5, PXDN, CCL3, HDAC6	55	202	16792	7.55716	0.999908	0.369523	0.368563
GOTERM_BP_ALL	GO:0071495~cellular response to endogenous stimulus	11	18.9655	0.00407112	PDGFRB, ZEB1, ANXA1, CCL5, NCOA4, RORB, PTPN12, KLF4, PRKACA, ATP6V1C1, HDAC6	55	1185	16792	2.83409	0.999919	0.369523	0.368563
GOTERM_BP_ALL	GO:0051924~regulation of calcium ion transport	5	8.62069	0.00416274	PDGFRB, STIM2, CCL5, CCL3, PRKACA	55	204	16792	7.48307	0.999934	0.369523	0.368563
GOTERM_BP_ALL	GO:0048731~system development	24	41.3793	0.00464932	PDGFRB, HEXIM1, ANXA1, SPARC, PCDH9, NCOA4, VLDLR, RORB, KLF4, QKI, HDAC6, AFF2, COPRS, ZEB1, ADAP2, CDK6, TCOF1, TBL1XR1, CCL3, PLCD3, MDGA2, FGF13, PRKACA, RAB11FIP4	55	4291	16792	1.70762	0.999979	0.385429	0.384427
GOTERM_BP_ALL	GO:0051928~positive regulation of calcium ion transport	4	6.89655	0.00467592	PDGFRB, STIM2, CCL5, CCL3	55	105	16792	11.6308	0.99998	0.385429	0.384427
GOTERM_BP_ALL	GO:0001503~ossification	6	10.3448	0.00582515	SPARC, CDK6, CCL3, RORB, RPS11, PRKACA	55	359	16792	5.10266	0.999999	0.458763	0.45757
GOTERM_BP_ALL	GO:0006811~ion transport	12	20.6897	0.00596312	SLC36A1, PDGFRB, SLC2A9, ANXA1, STIM2, SLCO4A1, CCL5, CCL3, ATP10A, FGF13, PRKACA, ATP6V1C1	55	1458	16792	2.51283	0.999999	0.458763	0.45757
GOTERM_BP_ALL	GO:1901700~response to oxygen-containing compound	12	20.6897	0.0062107	PDGFRB, SPARC, ZEB1, ANXA1, CDK6, CCL5, CCL3, RORB, KLF4, PRKACA, ATP6V1C1, HDAC6	55	1466	16792	2.49912	0.999999	0.462397	0.461194
GOTERM_BP_ALL	GO:0009653~anatomical structure morphogenesis	17	29.3103	0.00700951	PDGFRB, ANXA1, SPARC, ATP10A, VLDLR, RORB, KLF4, QKI, HDAC6, RRP7A, FMNL1, FMNL2, ZEB1, CCL3, PLCD3, FGF13, PRKACA	55	2631	16792	1.97273	1	0.470135	0.468913
GOTERM_BP_ALL	GO:0080134~regulation of response to stress	11	18.9655	0.00717144	RNASEH2B, ANXA1, CDK6, CCL5, PDCD4, CCL3, AOAH, KLF4, PRKACA, HDAC6, HLA-E	55	1285	16792	2.61354	1	0.470135	0.468913
GOTERM_BP_ALL	GO:0042542~response to hydrogen peroxide	4	6.89655	0.00757665	PDGFRB, ANXA1, KLF4, HDAC6	55	125	16792	9.76989	1	0.470135	0.468913
GOTERM_BP_ALL	GO:0071702~organic substance transport	17	29.3103	0.00770856	SLC36A1, ANXA1, NCOA4, ATP10A, VLDLR, LYST, QKI, HDAC6, HLA-E, SLC2A9, SLCO4A1, ZMAT3, CCL5, CCL3, RPS11, PRKACA, ATP6V1C1	55	2657	16792	1.95343	1	0.470135	0.468913
GOTERM_BP_ALL	GO:0048522~positive regulation of cellular process	25	43.1034	0.00794339	RNASEH2B, SPARC, VLDLR, RORB, NAT14, BACH1, HDAC6, ZMAT3, CCL5, CCL3, SYNPO, PRKACA, RAB11FIP4, PDGFRB, HEXIM1, ANXA1, NCOA4, KLF4, HLA-E, ZEB1, CDK6, STIM2, TBL1XR1, PDCD4, FGF13	55	4744	16792	1.60892	1	0.470135	0.468913
GOTERM_BP_ALL	GO:0045859~regulation of protein kinase activity	8	13.7931	0.00853748	HEXIM1, PDGFRB, CCL5, PDCD4, LRRC4, VLDLR, FGF13, PRKACA	55	730	16792	3.34585	1	0.470135	0.468913
GOTERM_BP_ALL	GO:0006979~response to oxidative stress	6	10.3448	0.0085461	PDGFRB, NDUFA6, ANXA1, PXDN, KLF4, HDAC6	55	394	16792	4.64938	1	0.470135	0.468913
GOTERM_BP_ALL	GO:0060326~cell chemotaxis	5	8.62069	0.00858837	PDGFRB, ANXA1, CCL5, CCL3, LYST	55	251	16792	6.08185	1	0.470135	0.468913
GOTERM_BP_ALL	GO:2000113~negative regulation of cellular macromolecule biosynthetic process	11	18.9655	0.00879076	HEXIM1, ZEB1, TBL1XR1, PDCD4, RORB, VLDLR, KLF4, NOC2L, BACH1, QKI, HDAC6	55	1324	16792	2.53656	1	0.470135	0.468913
GOTERM_BP_ALL	GO:2000145~regulation of cell motility	8	13.7931	0.00891056	PDGFRB, SPARC, ANXA1, CDK6, CCL5, CCL3, KLF4, HDAC6	55	736	16792	3.31858	1	0.470135	0.468913
GOTERM_BP_ALL	GO:0051093~negative regulation of developmental process	8	13.7931	0.00910157	SPARC, ZEB1, ANXA1, CDK6, CCL3, FGF13, KLF4, PRKACA	55	739	16792	3.30511	1	0.470135	0.468913
GOTERM_BP_ALL	GO:0009719~response to endogenous stimulus	12	20.6897	0.00925007	PDGFRB, SPARC, ZEB1, ANXA1, CCL5, NCOA4, RORB, PTPN12, KLF4, PRKACA, ATP6V1C1, HDAC6	55	1548	16792	2.36674	1	0.470135	0.468913
GOTERM_BP_ALL	GO:0045892~negative regulation of transcription, DNA-templated	10	17.2414	0.00937589	HEXIM1, ZEB1, TBL1XR1, PDCD4, RORB, VLDLR, KLF4, NOC2L, BACH1, HDAC6	55	1130	16792	2.70185	1	0.470135	0.468913
GOTERM_BP_ALL	GO:0044707~single-multicellular organism process	29	50	0.0094886	RNASEH2B, SPARC, VLDLR, RORB, HDAC6, AFF2, RRP7A, ADAP2, TCOF1, CCL3, HIVEP2, RPS11, PRKACA, RAB11FIP4, PDGFRB, HEXIM1, ANXA1, PCDH9, NCOA4, KLF4, QKI, HLA-E, COPRS, ZEB1, CDK6, TBL1XR1, PLCD3, MDGA2, FGF13	55	5943	16792	1.48981	1	0.470135	0.468913
GOTERM_BP_ALL	GO:0022604~regulation of cell morphogenesis	7	12.069	0.00951561	FMNL1, SPARC, FMNL2, ANXA1, CCL3, ATP10A, FGF13	55	568	16792	3.76261	1	0.470135	0.468913
GOTERM_BP_ALL	GO:0060761~negative regulation of response to cytokine stimulus	3	5.17241	0.0100027	CCL5, PXDN, KLF4	55	47	16792	19.4878	1	0.470135	0.468913
GOTERM_BP_ALL	GO:0043068~positive regulation of programmed cell death	7	12.069	0.0102339	PDGFRB, ANXA1, ZMAT3, CCL5, PDCD4, CCL3, HDAC6	55	577	16792	3.70392	1	0.470135	0.468913
GOTERM_BP_ALL	GO:0051338~regulation of transferase activity	9	15.5172	0.0107903	HEXIM1, PDGFRB, CCL5, PDCD4, LRRC4, VLDLR, FGF13, KLF4, PRKACA	55	955	16792	2.87726	1	0.470135	0.468913
GOTERM_BP_ALL	GO:0048585~negative regulation of response to stimulus	11	18.9655	0.010998	ANXA1, CDK6, CCL5, PXDN, PDCD4, LRRC4, AOAH, KLF4, NOC2L, PRKACA, HLA-E	55	1369	16792	2.45318	1	0.470135	0.468913
GOTERM_BP_ALL	GO:0040012~regulation of locomotion	8	13.7931	0.0111075	PDGFRB, SPARC, ANXA1, CDK6, CCL5, CCL3, KLF4, HDAC6	55	768	16792	3.1803	1	0.470135	0.468913
GOTERM_BP_ALL	GO:0008360~regulation of cell shape	4	6.89655	0.0113445	FMNL1, ANXA1, CCL3, ATP10A	55	145	16792	8.42232	1	0.470135	0.468913
GOTERM_BP_ALL	GO:0090304~nucleic acid metabolic process	26	44.8276	0.011439	RBM28, RNASEH2B, VLDLR, RORB, NOC2L, NAT14, BACH1, HDAC6, AFF2, RRP7A, CCL5, CCL3, HIVEP2, RPS11, PRKACA, PDGFRB, HEXIM1, PRMT7, ANXA1, NCOA4, KLF4, QKI, COPRS, ZEB1, TBL1XR1, PDCD4	55	5158	16792	1.53898	1	0.470135	0.468913
GOTERM_BP_ALL	GO:1903507~negative regulation of nucleic acid-templated transcription	10	17.2414	0.0120595	HEXIM1, ZEB1, TBL1XR1, PDCD4, RORB, VLDLR, KLF4, NOC2L, BACH1, HDAC6	55	1177	16792	2.59396	1	0.470135	0.468913
GOTERM_BP_ALL	GO:0048519~negative regulation of biological process	24	41.3793	0.012113	PDGFRB, HEXIM1, RNASEH2B, ANXA1, SPARC, LRRC4, VLDLR, RORB, AOAH, KLF4, NOC2L, BACH1, QKI, HDAC6, HLA-E, ZEB1, CDK6, TBL1XR1, CCL5, PXDN, CCL3, PDCD4, FGF13, PRKACA	55	4623	16792	1.58499	1	0.470135	0.468913
GOTERM_BP_ALL	GO:0006812~cation transport	9	15.5172	0.0121296	SLC36A1, PDGFRB, SLC2A9, STIM2, CCL5, CCL3, FGF13, PRKACA, ATP6V1C1	55	975	16792	2.81824	1	0.470135	0.468913
GOTERM_BP_ALL	GO:0001101~response to acid chemical	5	8.62069	0.0121583	PDGFRB, SPARC, ZEB1, RORB, KLF4	55	278	16792	5.49117	1	0.470135	0.468913
GOTERM_BP_ALL	GO:0051726~regulation of cell cycle	9	15.5172	0.0121996	HEXIM1, PDGFRB, RNASEH2B, ANXA1, CDK6, PDCD4, PRKACA, CABLES2, RAB11FIP4	55	976	16792	2.81535	1	0.470135	0.468913
GOTERM_BP_ALL	GO:0016477~cell migration	10	17.2414	0.0125043	PDGFRB, FMNL1, SPARC, ANXA1, CCL5, CCL3, FGF13, KLF4, LYST, HDAC6	55	1184	16792	2.57862	1	0.470135	0.468913
GOTERM_BP_ALL	GO:0010942~positive regulation of cell death	7	12.069	0.012909	PDGFRB, ANXA1, ZMAT3, CCL5, PDCD4, CCL3, HDAC6	55	607	16792	3.52086	1	0.470135	0.468913
GOTERM_BP_ALL	GO:0016070~RNA metabolic process	24	41.3793	0.0129454	HEXIM1, RBM28, RNASEH2B, PRMT7, NCOA4, VLDLR, RORB, KLF4, NOC2L, NAT14, BACH1, QKI, HDAC6, AFF2, RRP7A, COPRS, ZEB1, TBL1XR1, CCL5, CCL3, PDCD4, HIVEP2, RPS11, PRKACA	55	4648	16792	1.57647	1	0.470135	0.468913
GOTERM_BP_ALL	GO:0051128~regulation of cellular component organization	15	25.8621	0.0131787	PDGFRB, ANXA1, SPARC, LRRC4, ATP10A, VLDLR, KLF4, NOC2L, HDAC6, FMNL1, FMNL2, CCL3, FGF13, SYNPO, PRKACA	55	2323	16792	1.97143	1	0.470135	0.468913
GOTERM_BP_ALL	GO:0010605~negative regulation of macromolecule metabolic process	15	25.8621	0.0133214	HEXIM1, RNASEH2B, LRRC4, VLDLR, RORB, KLF4, NOC2L, BACH1, QKI, HDAC6, ZEB1, TBL1XR1, CCL5, CCL3, PDCD4	55	2326	16792	1.96889	1	0.470135	0.468913
GOTERM_BP_ALL	GO:0006810~transport	24	41.3793	0.0134672	PDGFRB, SLC36A1, ANXA1, SPARC, NCOA4, ATP10A, VLDLR, NOC2L, LYST, QKI, HDAC6, HLA-E, SLC2A9, TCOF1, SLCO4A1, ZMAT3, STIM2, CCL5, CCL3, FGF13, RPS11, PRKACA, ATP6V1C1, RAB11FIP4	55	4663	16792	1.5714	1	0.470135	0.468913
GOTERM_BP_ALL	GO:0048146~positive regulation of fibroblast proliferation	3	5.17241	0.013518	PDGFRB, RNASEH2B, CDK6	55	55	16792	16.6532	1	0.470135	0.468913
GOTERM_BP_ALL	GO:0010033~response to organic substance	17	29.3103	0.0135906	PDGFRB, ANXA1, SPARC, NCOA4, LRRC4, RORB, PTPN12, KLF4, HDAC6, HLA-E, ZEB1, CDK6, CCL5, PXDN, CCL3, PRKACA, ATP6V1C1	55	2822	16792	1.83921	1	0.470135	0.468913
GOTERM_BP_ALL	GO:0043010~camera-type eye development	5	8.62069	0.0136901	PDGFRB, ZEB1, RORB, KLF4, RAB11FIP4	55	288	16792	5.30051	1	0.470135	0.468913
GOTERM_BP_ALL	GO:0034097~response to cytokine	8	13.7931	0.0138515	SPARC, ANXA1, CCL5, PXDN, LRRC4, CCL3, KLF4, HLA-E	55	802	16792	3.04548	1	0.470135	0.468913
GOTERM_BP_ALL	GO:0070848~response to growth factor	7	12.069	0.0157097	PDGFRB, SPARC, ZEB1, CCL5, PTPN12, KLF4, HDAC6	55	634	16792	3.37092	1	0.519394	0.518043
GOTERM_BP_ALL	GO:0048518~positive regulation of biological process	26	44.8276	0.0157528	RNASEH2B, SPARC, VLDLR, RORB, NAT14, BACH1, HDAC6, ZMAT3, CCL5, CCL3, SYNPO, PRKACA, RAB11FIP4, PDGFRB, HEXIM1, ANXA1, NCOA4, KLF4, QKI, HLA-E, ZEB1, CDK6, STIM2, TBL1XR1, PDCD4, FGF13	55	5285	16792	1.50199	1	0.519394	0.518043
GOTERM_BP_ALL	GO:0051179~localization	28	48.2759	0.0162297	SPARC, LRRC4, ATP10A, VLDLR, NOC2L, LYST, HDAC6, TCOF1, ZMAT3, CCL5, CCL3, RPS11, PRKACA, ATP6V1C1, RAB11FIP4, SLC36A1, PDGFRB, ANXA1, NCOA4, KLF4, QKI, HLA-E, SLC2A9, FMNL1, CDK6, SLCO4A1, STIM2, FGF13	55	5872	16792	1.45583	1	0.52027	0.518917
GOTERM_BP_ALL	GO:0045596~negative regulation of cell differentiation	7	12.069	0.0163855	ZEB1, ANXA1, CDK6, PDCD4, CCL3, RORB, FGF13	55	640	16792	3.33932	1	0.52027	0.518917
GOTERM_BP_ALL	GO:0002548~monocyte chemotaxis	3	5.17241	0.0164557	ANXA1, CCL5, CCL3	55	61	16792	15.0152	1	0.52027	0.518917
GOTERM_BP_ALL	GO:0010517~regulation of phospholipase activity	3	5.17241	0.0169695	PDGFRB, ANXA1, CCL5	55	62	16792	14.773	1	0.529266	0.52789
GOTERM_BP_ALL	GO:0007399~nervous system development	14	24.1379	0.0179617	ANXA1, PCDH9, VLDLR, RORB, KLF4, QKI, HDAC6, AFF2, ZEB1, CDK6, CCL3, MDGA2, FGF13, PRKACA	55	2170	16792	1.96974	1	0.546523	0.545102
GOTERM_BP_ALL	GO:1903037~regulation of leukocyte cell-cell adhesion	5	8.62069	0.0180431	ZEB1, ANXA1, CCL5, KLF4, HLA-E	55	313	16792	4.87714	1	0.546523	0.545102
GOTERM_BP_ALL	GO:0050727~regulation of inflammatory response	5	8.62069	0.0182332	ANXA1, CCL5, CCL3, AOAH, KLF4	55	314	16792	4.86161	1	0.546523	0.545102
GOTERM_BP_ALL	GO:0051234~establishment of localization	24	41.3793	0.0186192	PDGFRB, SLC36A1, ANXA1, SPARC, NCOA4, ATP10A, VLDLR, NOC2L, LYST, QKI, HDAC6, HLA-E, SLC2A9, TCOF1, SLCO4A1, ZMAT3, STIM2, CCL5, CCL3, FGF13, RPS11, PRKACA, ATP6V1C1, RAB11FIP4	55	4790	16792	1.52973	1	0.550937	0.549505
GOTERM_BP_ALL	GO:0043985~histone H4-R3 methylation	2	3.44828	0.0191433	COPRS, PRMT7	55	6	16792	101.77	1	0.559274	0.55782
GOTERM_BP_ALL	GO:0014812~muscle cell migration	3	5.17241	0.0196399	PDGFRB, ANXA1, CCL5	55	67	16792	13.6706	1	0.564156	0.562689
GOTERM_BP_ALL	GO:0010959~regulation of metal ion transport	5	8.62069	0.0197992	PDGFRB, STIM2, CCL5, CCL3, PRKACA	55	322	16792	4.74082	1	0.564156	0.562689
GOTERM_BP_ALL	GO:0030279~negative regulation of ossification	3	5.17241	0.0201939	CDK6, CCL3, RORB	55	68	16792	13.4695	1	0.566682	0.565208
GOTERM_BP_ALL	GO:0007159~leukocyte cell-cell adhesion	6	10.3448	0.0204477	ZEB1, ANXA1, CDK6, CCL5, KLF4, HLA-E	55	491	16792	3.73086	1	0.566682	0.565208
GOTERM_BP_ALL	GO:0030278~regulation of ossification	4	6.89655	0.0207376	CDK6, CCL3, RORB, PRKACA	55	182	16792	6.71009	1	0.566682	0.565208
GOTERM_BP_ALL	GO:0031347~regulation of defense response	7	12.069	0.02087	ANXA1, CCL5, CCL3, AOAH, KLF4, PRKACA, HLA-E	55	676	16792	3.16148	1	0.566682	0.565208
GOTERM_BP_ALL	GO:0001932~regulation of protein phosphorylation	10	17.2414	0.0218165	HEXIM1, PDGFRB, CCL5, PDCD4, LRRC4, CCL3, VLDLR, FGF13, KLF4, PRKACA	55	1300	16792	2.34853	1	0.577333	0.575832
GOTERM_BP_ALL	GO:0030334~regulation of cell migration	7	12.069	0.0221105	PDGFRB, SPARC, ANXA1, CCL5, CCL3, KLF4, HDAC6	55	685	16792	3.11995	1	0.577333	0.575832
GOTERM_BP_ALL	GO:2000503~positive regulation of natural killer cell chemotaxis	2	3.44828	0.0222987	CCL5, CCL3	55	7	16792	87.2312	1	0.577333	0.575832
GOTERM_BP_ALL	GO:0001654~eye development	5	8.62069	0.0223009	PDGFRB, ZEB1, RORB, KLF4, RAB11FIP4	55	334	16792	4.5705	1	0.577333	0.575832
GOTERM_BP_ALL	GO:0040011~locomotion	11	18.9655	0.022513	PDGFRB, FMNL1, SPARC, ANXA1, CDK6, CCL5, CCL3, FGF13, KLF4, LYST, HDAC6	55	1530	16792	2.19503	1	0.577333	0.575832
GOTERM_BP_ALL	GO:0007423~sensory organ development	6	10.3448	0.0231153	PDGFRB, SPARC, ZEB1, RORB, KLF4, RAB11FIP4	55	507	16792	3.61313	1	0.586265	0.584741
GOTERM_BP_ALL	GO:0045595~regulation of cell differentiation	11	18.9655	0.0238245	ZEB1, ANXA1, CDK6, PDCD4, CCL3, RORB, VLDLR, FGF13, KLF4, PRKACA, HDAC6	55	1544	16792	2.17513	1	0.591101	0.589565
GOTERM_BP_ALL	GO:0010468~regulation of gene expression	22	37.931	0.0243582	HEXIM1, RNASEH2B, PRMT7, NCOA4, VLDLR, RORB, KLF4, NOC2L, NAT14, BACH1, QKI, HDAC6, AFF2, COPRS, ZEB1, CDK6, TBL1XR1, CCL5, CCL3, PDCD4, HIVEP2, PRKACA	55	4345	16792	1.54587	1	0.591101	0.589565
GOTERM_BP_ALL	GO:0030595~leukocyte chemotaxis	4	6.89655	0.0244771	ANXA1, CCL5, CCL3, LYST	55	194	16792	6.29503	1	0.591101	0.589565
GOTERM_BP_ALL	GO:0001649~osteoblast differentiation	4	6.89655	0.0248042	CDK6, CCL3, RORB, RPS11	55	195	16792	6.26275	1	0.591101	0.589565
GOTERM_BP_ALL	GO:0048870~cell motility	10	17.2414	0.0248855	PDGFRB, FMNL1, SPARC, ANXA1, CCL5, CCL3, FGF13, KLF4, LYST, HDAC6	55	1330	16792	2.29556	1	0.591101	0.589565
GOTERM_BP_ALL	GO:0051674~localization of cell	10	17.2414	0.0248855	PDGFRB, FMNL1, SPARC, ANXA1, CCL5, CCL3, FGF13, KLF4, LYST, HDAC6	55	1330	16792	2.29556	1	0.591101	0.589565
GOTERM_BP_ALL	GO:0006464~cellular protein modification process	20	34.4828	0.025415	PDGFRB, HEXIM1, PRMT7, ANXA1, LRRC4, VLDLR, PTPN12, KLF4, NOC2L, BACH1, KBTBD11, HDAC6, COPRS, CDK6, TBL1XR1, CCL5, CCL3, PDCD4, FGF13, PRKACA	55	3818	16792	1.59931	1	0.591101	0.589565
GOTERM_BP_ALL	GO:0036211~protein modification process	20	34.4828	0.025415	PDGFRB, HEXIM1, PRMT7, ANXA1, LRRC4, VLDLR, PTPN12, KLF4, NOC2L, BACH1, KBTBD11, HDAC6, COPRS, CDK6, TBL1XR1, CCL5, CCL3, PDCD4, FGF13, PRKACA	55	3818	16792	1.59931	1	0.591101	0.589565
GOTERM_BP_ALL	GO:0009892~negative regulation of metabolic process	15	25.8621	0.025611	HEXIM1, RNASEH2B, LRRC4, VLDLR, RORB, KLF4, NOC2L, BACH1, QKI, HDAC6, ZEB1, TBL1XR1, CCL5, CCL3, PDCD4	55	2522	16792	1.81587	1	0.591101	0.589565
GOTERM_BP_ALL	GO:0070301~cellular response to hydrogen peroxide	3	5.17241	0.0260846	ANXA1, KLF4, HDAC6	55	78	16792	11.7427	1	0.596072	0.594523
GOTERM_BP_ALL	GO:0006139~nucleobase-containing compound metabolic process	27	46.5517	0.0263442	RBM28, RNASEH2B, VLDLR, RORB, NOC2L, NAT14, BACH1, HDAC6, AFF2, RRP7A, CCL5, CCL3, HIVEP2, RPS11, PRKACA, PDGFRB, HEXIM1, NDUFA6, PRMT7, ANXA1, NCOA4, KLF4, QKI, COPRS, ZEB1, TBL1XR1, PDCD4	55	5794	16792	1.42274	1	0.596102	0.594552
GOTERM_BP_ALL	GO:0009893~positive regulation of metabolic process	17	29.3103	0.0272472	PDGFRB, ANXA1, NCOA4, VLDLR, RORB, KLF4, NAT14, BACH1, QKI, HDAC6, ZEB1, CDK6, TBL1XR1, CCL5, CCL3, FGF13, PRKACA	55	3052	16792	1.70061	1	0.610549	0.608962
GOTERM_BP_ALL	GO:0060191~regulation of lipase activity	3	5.17241	0.0279722	PDGFRB, ANXA1, CCL5	55	81	16792	11.3077	1	0.616396	0.614794
GOTERM_BP_ALL	GO:0033036~macromolecule localization	16	27.5862	0.0290387	ANXA1, NCOA4, LRRC4, ATP10A, VLDLR, LYST, QKI, HDAC6, HLA-E, ZMAT3, CCL5, CCL3, FGF13, RPS11, PRKACA, ATP6V1C1	55	2817	16792	1.73409	1	0.616396	0.614794
GOTERM_BP_ALL	GO:2000106~regulation of leukocyte apoptotic process	3	5.17241	0.0292604	ANXA1, CCL5, NOC2L	55	83	16792	11.0353	1	0.616396	0.614794
GOTERM_BP_ALL	GO:0006796~phosphate-containing compound metabolic process	17	29.3103	0.0296965	PDGFRB, HEXIM1, RNASEH2B, NDUFA6, GK, LRRC4, VLDLR, PTPN12, KLF4, CDK6, TBL1XR1, CCL5, CCL3, PDCD4, PLCD3, FGF13, PRKACA	55	3083	16792	1.68351	1	0.616396	0.614794
GOTERM_BP_ALL	GO:0000302~response to reactive oxygen species	4	6.89655	0.0299947	PDGFRB, ANXA1, KLF4, HDAC6	55	210	16792	5.81541	1	0.616396	0.614794
GOTERM_BP_ALL	GO:0006793~phosphorus metabolic process	17	29.3103	0.0301894	PDGFRB, HEXIM1, RNASEH2B, NDUFA6, GK, LRRC4, VLDLR, PTPN12, KLF4, CDK6, TBL1XR1, CCL5, CCL3, PDCD4, PLCD3, FGF13, PRKACA	55	3089	16792	1.68024	1	0.616396	0.614794
GOTERM_BP_ALL	GO:0006816~calcium ion transport	5	8.62069	0.0306705	PDGFRB, STIM2, CCL5, CCL3, PRKACA	55	369	16792	4.13698	1	0.616396	0.614794
GOTERM_BP_ALL	GO:0019220~regulation of phosphate metabolic process	11	18.9655	0.0307742	HEXIM1, PDGFRB, TBL1XR1, CCL5, PDCD4, LRRC4, CCL3, VLDLR, FGF13, KLF4, PRKACA	55	1610	16792	2.08596	1	0.616396	0.614794
GOTERM_BP_ALL	GO:0051174~regulation of phosphorus metabolic process	11	18.9655	0.0308896	HEXIM1, PDGFRB, TBL1XR1, CCL5, PDCD4, LRRC4, CCL3, VLDLR, FGF13, KLF4, PRKACA	55	1611	16792	2.08467	1	0.616396	0.614794
GOTERM_BP_ALL	GO:0043270~positive regulation of ion transport	4	6.89655	0.0310966	PDGFRB, STIM2, CCL5, CCL3	55	213	16792	5.7335	1	0.616396	0.614794
GOTERM_BP_ALL	GO:2000501~regulation of natural killer cell chemotaxis	2	3.44828	0.0317051	CCL5, CCL3	55	10	16792	61.0618	1	0.616396	0.614794
GOTERM_BP_ALL	GO:0048144~fibroblast proliferation	3	5.17241	0.0319066	PDGFRB, RNASEH2B, CDK6	55	87	16792	10.5279	1	0.616396	0.614794
GOTERM_BP_ALL	GO:0031324~negative regulation of cellular metabolic process	14	24.1379	0.0320248	HEXIM1, LRRC4, VLDLR, RORB, KLF4, NOC2L, BACH1, QKI, HDAC6, ZEB1, TBL1XR1, CCL5, CCL3, PDCD4	55	2345	16792	1.82274	1	0.616396	0.614794
GOTERM_BP_ALL	GO:0010467~gene expression	25	43.1034	0.0320293	RBM28, RNASEH2B, VLDLR, RORB, NOC2L, NAT14, BACH1, HDAC6, AFF2, RRP7A, CCL5, CCL3, HIVEP2, RPS11, PRKACA, HEXIM1, PRMT7, NCOA4, KLF4, QKI, COPRS, ZEB1, CDK6, TBL1XR1, PDCD4	55	5306	16792	1.43851	1	0.616396	0.614794
GOTERM_BP_ALL	GO:0000122~negative regulation of transcription from RNA polymerase II promoter	7	12.069	0.0322205	HEXIM1, ZEB1, TBL1XR1, VLDLR, KLF4, NOC2L, BACH1	55	748	16792	2.85717	1	0.616396	0.614794
GOTERM_BP_ALL	GO:0042325~regulation of phosphorylation	10	17.2414	0.0323267	HEXIM1, PDGFRB, CCL5, PDCD4, LRRC4, CCL3, VLDLR, FGF13, KLF4, PRKACA	55	1393	16792	2.19174	1	0.616396	0.614794
GOTERM_BP_ALL	GO:0010604~positive regulation of macromolecule metabolic process	16	27.5862	0.0324372	PDGFRB, NCOA4, VLDLR, RORB, KLF4, NAT14, BACH1, QKI, HDAC6, ZEB1, CDK6, TBL1XR1, CCL5, CCL3, FGF13, PRKACA	55	2856	16792	1.71042	1	0.616396	0.614794
GOTERM_BP_ALL	GO:1902106~negative regulation of leukocyte differentiation	3	5.17241	0.0325825	ANXA1, CDK6, CCL3	55	88	16792	10.4083	1	0.616396	0.614794
GOTERM_BP_ALL	GO:0048145~regulation of fibroblast proliferation	3	5.17241	0.0325825	PDGFRB, RNASEH2B, CDK6	55	88	16792	10.4083	1	0.616396	0.614794
GOTERM_BP_ALL	GO:0048545~response to steroid hormone	5	8.62069	0.0339158	SPARC, ANXA1, NCOA4, RORB, HDAC6	55	381	16792	4.00668	1	0.632024	0.630381
GOTERM_BP_ALL	GO:0046483~heterocycle metabolic process	27	46.5517	0.0344196	RBM28, RNASEH2B, VLDLR, RORB, NOC2L, NAT14, BACH1, HDAC6, AFF2, RRP7A, CCL5, CCL3, HIVEP2, RPS11, PRKACA, PDGFRB, HEXIM1, NDUFA6, PRMT7, ANXA1, NCOA4, KLF4, QKI, COPRS, ZEB1, TBL1XR1, PDCD4	55	5919	16792	1.39269	1	0.632024	0.630381
GOTERM_BP_ALL	GO:0072593~reactive oxygen species metabolic process	4	6.89655	0.0345295	PDGFRB, PXDN, KLF4, HDAC6	55	222	16792	5.50106	1	0.632024	0.630381
GOTERM_BP_ALL	GO:0048245~eosinophil chemotaxis	2	3.44828	0.0348209	CCL5, CCL3	55	11	16792	55.5107	1	0.632024	0.630381
GOTERM_BP_ALL	GO:0006950~response to stress	19	32.7586	0.0351045	PDGFRB, RNASEH2B, ANXA1, SPARC, NDUFA6, PTPN12, AOAH, KLF4, LYST, BACH1, HDAC6, HLA-E, CDK6, ZMAT3, CCL5, PXDN, CCL3, PDCD4, PRKACA	55	3677	16792	1.57761	1	0.632024	0.630381
GOTERM_BP_ALL	GO:0050793~regulation of developmental process	13	22.4138	0.0353249	PDGFRB, ANXA1, SPARC, ATP10A, VLDLR, KLF4, FMNL1, FMNL2, ZEB1, CDK6, CCL3, FGF13, PRKACA	55	2129	16792	1.86426	1	0.632024	0.630381
GOTERM_BP_ALL	GO:0022407~regulation of cell-cell adhesion	5	8.62069	0.0353254	ZEB1, ANXA1, CCL5, KLF4, HLA-E	55	386	16792	3.95478	1	0.632024	0.630381
GOTERM_BP_ALL	GO:0043065~positive regulation of apoptotic process	6	10.3448	0.0362477	PDGFRB, ANXA1, ZMAT3, CCL5, PDCD4, CCL3	55	572	16792	3.20254	1	0.643535	0.641862
GOTERM_BP_ALL	GO:0031399~regulation of protein modification process	11	18.9655	0.0374639	HEXIM1, PDGFRB, CCL5, PDCD4, LRRC4, CCL3, VLDLR, FGF13, KLF4, NOC2L, PRKACA	55	1664	16792	2.01827	1	0.648772	0.647085
GOTERM_BP_ALL	GO:0006725~cellular aromatic compound metabolic process	27	46.5517	0.0378445	RBM28, RNASEH2B, VLDLR, RORB, NOC2L, NAT14, BACH1, HDAC6, AFF2, RRP7A, CCL5, CCL3, HIVEP2, RPS11, PRKACA, PDGFRB, HEXIM1, NDUFA6, PRMT7, ANXA1, NCOA4, KLF4, QKI, COPRS, ZEB1, TBL1XR1, PDCD4	55	5965	16792	1.38195	1	0.648772	0.647085
GOTERM_BP_ALL	GO:0035747~natural killer cell chemotaxis	2	3.44828	0.0379267	CCL5, CCL3	55	12	16792	50.8848	1	0.648772	0.647085
GOTERM_BP_ALL	GO:0034969~histone arginine methylation	2	3.44828	0.0379267	COPRS, PRMT7	55	12	16792	50.8848	1	0.648772	0.647085
GOTERM_BP_ALL	GO:0030335~positive regulation of cell migration	5	8.62069	0.0379481	PDGFRB, SPARC, CCL5, CCL3, HDAC6	55	395	16792	3.86467	1	0.648772	0.647085
GOTERM_BP_ALL	GO:0007166~cell surface receptor signaling pathway	15	25.8621	0.0394386	PDGFRB, ANXA1, LRRC4, VLDLR, PTPN12, KLF4, HLA-E, ZEB1, CDK6, TBL1XR1, CCL5, PXDN, CCL3, PRKACA, ATP6V1C1	55	2669	16792	1.71586	1	0.66208	0.660359
GOTERM_BP_ALL	GO:0042102~positive regulation of T cell proliferation	3	5.17241	0.0396446	ANXA1, CCL5, HLA-E	55	98	16792	9.3462	1	0.66208	0.660359
GOTERM_BP_ALL	GO:0022008~neurogenesis	10	17.2414	0.0398568	ZEB1, ANXA1, CDK6, CCL3, RORB, VLDLR, FGF13, KLF4, MDGA2, HDAC6	55	1447	16792	2.10995	1	0.66208	0.660359
GOTERM_BP_ALL	GO:0043922~negative regulation by host of viral transcription	2	3.44828	0.0410228	CCL5, CCL3	55	13	16792	46.9706	1	0.66208	0.660359
GOTERM_BP_ALL	GO:0014065~phosphatidylinositol 3-kinase signaling	3	5.17241	0.041121	PDGFRB, CCL5, KLF4	55	100	16792	9.15927	1	0.66208	0.660359
GOTERM_BP_ALL	GO:0010628~positive regulation of gene expression	11	18.9655	0.0413111	ZEB1, CDK6, TBL1XR1, CCL5, NCOA4, CCL3, RORB, KLF4, NAT14, BACH1, QKI	55	1692	16792	1.98487	1	0.66208	0.660359
GOTERM_BP_ALL	GO:0048523~negative regulation of cellular process	21	36.2069	0.0419443	PDGFRB, HEXIM1, ANXA1, SPARC, LRRC4, VLDLR, RORB, KLF4, NOC2L, BACH1, QKI, HDAC6, ZEB1, CDK6, TBL1XR1, CCL5, PXDN, CCL3, PDCD4, FGF13, PRKACA	55	4300	16792	1.49104	1	0.66208	0.660359
GOTERM_BP_ALL	GO:2000147~positive regulation of cell motility	5	8.62069	0.0422468	PDGFRB, SPARC, CCL5, CCL3, HDAC6	55	409	16792	3.73238	1	0.66208	0.660359
GOTERM_BP_ALL	GO:0071383~cellular response to steroid hormone stimulus	4	6.89655	0.0423967	ANXA1, NCOA4, RORB, HDAC6	55	241	16792	5.06737	1	0.66208	0.660359
GOTERM_BP_ALL	GO:0090279~regulation of calcium ion import	3	5.17241	0.0426181	PDGFRB, CCL3, PRKACA	55	102	16792	8.97968	1	0.66208	0.660359
GOTERM_BP_ALL	GO:0071887~leukocyte apoptotic process	3	5.17241	0.0426181	ANXA1, CCL5, NOC2L	55	102	16792	8.97968	1	0.66208	0.660359
GOTERM_BP_ALL	GO:0070371~ERK1 and ERK2 cascade	4	6.89655	0.0432732	PDGFRB, CCL5, CCL3, KLF4	55	243	16792	5.02566	1	0.66208	0.660359
GOTERM_BP_ALL	GO:0051241~negative regulation of multicellular organismal process	8	13.7931	0.0433149	SPARC, ANXA1, CDK6, CCL3, RORB, FGF13, KLF4, PRKACA	55	1017	16792	2.40164	1	0.66208	0.660359
GOTERM_BP_ALL	GO:0071621~granulocyte chemotaxis	3	5.17241	0.0433743	ANXA1, CCL5, CCL3	55	103	16792	8.8925	1	0.66208	0.660359
GOTERM_BP_ALL	GO:0008104~protein localization	14	24.1379	0.043431	ANXA1, NCOA4, LRRC4, VLDLR, LYST, HDAC6, HLA-E, ZMAT3, CCL5, CCL3, FGF13, RPS11, PRKACA, ATP6V1C1	55	2448	16792	1.74605	1	0.66208	0.660359
GOTERM_BP_ALL	GO:1902105~regulation of leukocyte differentiation	4	6.89655	0.0437149	ZEB1, ANXA1, CDK6, CCL3	55	244	16792	5.00507	1	0.66208	0.660359
GOTERM_BP_ALL	GO:0070838~divalent metal ion transport	5	8.62069	0.0451513	PDGFRB, STIM2, CCL5, CCL3, PRKACA	55	418	16792	3.65202	1	0.66208	0.660359
GOTERM_BP_ALL	GO:0030001~metal ion transport	7	12.069	0.0456681	PDGFRB, STIM2, CCL5, CCL3, FGF13, PRKACA, ATP6V1C1	55	814	16792	2.62551	1	0.66208	0.660359
GOTERM_BP_ALL	GO:0032526~response to retinoic acid	3	5.17241	0.0456729	PDGFRB, RORB, KLF4	55	106	16792	8.64082	1	0.66208	0.660359
GOTERM_BP_ALL	GO:0071363~cellular response to growth factor stimulus	6	10.3448	0.0457135	PDGFRB, SPARC, ZEB1, CCL5, PTPN12, KLF4	55	610	16792	3.00304	1	0.66208	0.660359
GOTERM_BP_ALL	GO:0051272~positive regulation of cellular component movement	5	8.62069	0.0458117	PDGFRB, SPARC, CCL5, CCL3, HDAC6	55	420	16792	3.63463	1	0.66208	0.660359
GOTERM_BP_ALL	GO:0070372~regulation of ERK1 and ERK2 cascade	4	6.89655	0.0459574	PDGFRB, CCL5, CCL3, KLF4	55	249	16792	4.90456	1	0.66208	0.660359
GOTERM_BP_ALL	GO:0043412~macromolecule modification	20	34.4828	0.0460555	PDGFRB, HEXIM1, PRMT7, ANXA1, LRRC4, VLDLR, PTPN12, KLF4, NOC2L, BACH1, KBTBD11, HDAC6, COPRS, CDK6, TBL1XR1, CCL5, CCL3, PDCD4, FGF13, PRKACA	55	4065	16792	1.50214	1	0.66208	0.660359
GOTERM_BP_ALL	GO:0072511~divalent inorganic cation transport	5	8.62069	0.046144	PDGFRB, STIM2, CCL5, CCL3, PRKACA	55	421	16792	3.626	1	0.66208	0.660359
GOTERM_BP_ALL	GO:0040017~positive regulation of locomotion	5	8.62069	0.0464776	PDGFRB, SPARC, CCL5, CCL3, HDAC6	55	422	16792	3.61741	1	0.66208	0.660359
GOTERM_BP_ALL	GO:0007165~signal transduction	26	44.8276	0.0465289	SPARC, LRRC4, VLDLR, RORB, NOC2L, HDAC6, ZMAT3, CCL5, CCL3, HIVEP2, PRKACA, ATP6V1C1, PDGFRB, HEXIM1, ANXA1, NCOA4, PTPN12, KLF4, HLA-E, ZEB1, CDK6, TBL1XR1, PXDN, PDCD4, PLCD3, FGF13	55	5775	16792	1.37455	1	0.66208	0.660359
GOTERM_BP_ALL	GO:0090068~positive regulation of cell cycle process	4	6.89655	0.0468702	PDGFRB, ANXA1, PRKACA, RAB11FIP4	55	251	16792	4.86548	1	0.66208	0.660359
GOTERM_BP_ALL	GO:0032717~negative regulation of interleukin-8 production	2	3.44828	0.0471856	ANXA1, KLF4	55	15	16792	40.7079	1	0.66208	0.660359
GOTERM_BP_ALL	GO:0072677~eosinophil migration	2	3.44828	0.0471856	CCL5, CCL3	55	15	16792	40.7079	1	0.66208	0.660359
GOTERM_BP_ALL	GO:0032870~cellular response to hormone stimulus	6	10.3448	0.0473324	ANXA1, NCOA4, RORB, PRKACA, ATP6V1C1, HDAC6	55	616	16792	2.97379	1	0.66208	0.660359
GOTERM_BP_ALL	GO:0016310~phosphorylation	13	22.4138	0.0478556	PDGFRB, HEXIM1, NDUFA6, GK, LRRC4, VLDLR, KLF4, CDK6, CCL5, CCL3, PDCD4, FGF13, PRKACA	55	2229	16792	1.78063	1	0.663595	0.66187
GOTERM_BP_ALL	GO:0048659~smooth muscle cell proliferation	3	5.17241	0.0480157	PDGFRB, CCL5, KLF4	55	109	16792	8.403	1	0.663595	0.66187
GOTERM_BP_ALL	GO:0045667~regulation of osteoblast differentiation	3	5.17241	0.0488063	CDK6, RORB, PRKACA	55	110	16792	8.32661	1	0.670506	0.668763

## Sheet: SUPER.EA96
Category	Term	Count	%	PValue	Genes	List Total	Pop Hits	Pop Total	Fold Enrichment	Bonferroni	Benjamini	FDR
GOTERM_BP_ALL	GO:0010629~negative regulation of gene expression	16	28.0702	2.84516e-05	TLE4, HEXIM1, RNASEH2B, TLE1, CBX2, KLF4, NOC2L, BACH1, HDAC6, ZEB1, FGF9, TBL1XR1, CCL5, CCL3, PDCD4, NUP35	53	1485	16792	3.41366	0.0528662	0.0486057	0.0482747
GOTERM_BP_ALL	GO:1902679~negative regulation of RNA biosynthetic process	14	24.5614	5.17553e-05	TLE4, HEXIM1, TLE1, CBX2, KLF4, NOC2L, BACH1, HDAC6, ZEB1, FGF9, TBL1XR1, CCL5, CCL3, PDCD4	53	1194	16792	3.71493	0.0940793	0.0486057	0.0482747
GOTERM_BP_ALL	GO:0051253~negative regulation of RNA metabolic process	14	24.5614	7.63841e-05	TLE4, HEXIM1, TLE1, CBX2, KLF4, NOC2L, BACH1, HDAC6, ZEB1, FGF9, TBL1XR1, CCL5, CCL3, PDCD4	53	1240	16792	3.57712	0.135689	0.0486057	0.0482747
GOTERM_BP_ALL	GO:0045934~negative regulation of nucleobase-containing compound metabolic process	14	24.5614	0.000210272	TLE4, HEXIM1, TLE1, CBX2, KLF4, NOC2L, BACH1, HDAC6, ZEB1, FGF9, TBL1XR1, CCL5, CCL3, PDCD4	53	1371	16792	3.23532	0.330653	0.0836302	0.0830607
GOTERM_BP_ALL	GO:0010558~negative regulation of macromolecule biosynthetic process	14	24.5614	0.000293197	TLE4, HEXIM1, TLE1, CBX2, KLF4, NOC2L, BACH1, HDAC6, ZEB1, FGF9, TBL1XR1, CCL5, CCL3, PDCD4	53	1418	16792	3.12808	0.428674	0.0836302	0.0830607
GOTERM_BP_ALL	GO:0032502~developmental process	31	54.386	0.000295193	RNASEH2B, CPQ, SDC2, ATP10A, HDAC6, AFF2, RRP7A, PPP3CC, ADAP2, FGF9, CCL3, HIVEP2, PRKACA, RAB11FIP4, GINS1, HEXIM1, TLE1, PCDH9, CBX2, PTPN12, KLF4, FOSL2, COPRS, FMNL1, ZEB1, FMNL2, TBL1XR1, PDCD4, PLCD3, MDGA2, FGF13	53	5632	16792	1.74392	0.430848	0.0836302	0.0830607
GOTERM_BP_ALL	GO:0000122~negative regulation of transcription from RNA polymerase II promoter	10	17.5439	0.000432768	TLE4, HEXIM1, TLE1, ZEB1, FGF9, TBL1XR1, CBX2, KLF4, NOC2L, BACH1	53	748	16792	4.2357	0.562349	0.0836302	0.0830607
GOTERM_BP_ALL	GO:0031327~negative regulation of cellular biosynthetic process	14	24.5614	0.000444609	TLE4, HEXIM1, TLE1, CBX2, KLF4, NOC2L, BACH1, HDAC6, ZEB1, FGF9, TBL1XR1, CCL5, CCL3, PDCD4	53	1480	16792	2.99704	0.572135	0.0836302	0.0830607
GOTERM_BP_ALL	GO:0048856~anatomical structure development	30	52.6316	0.000469355	RNASEH2B, CPQ, SDC2, ATP10A, HDAC6, AFF2, RRP7A, PPP3CC, ADAP2, FGF9, CCL3, HIVEP2, PRKACA, RAB11FIP4, GINS1, HEXIM1, TLE1, PCDH9, CBX2, PTPN12, KLF4, FOSL2, COPRS, FMNL1, ZEB1, FMNL2, TBL1XR1, PLCD3, MDGA2, FGF13	53	5473	16792	1.73669	0.591886	0.0836302	0.0830607
GOTERM_BP_ALL	GO:0044767~single-organism developmental process	30	52.6316	0.000472576	RNASEH2B, CPQ, SDC2, ATP10A, HDAC6, AFF2, RRP7A, PPP3CC, ADAP2, FGF9, CCL3, HIVEP2, PRKACA, RAB11FIP4, GINS1, HEXIM1, TLE1, PCDH9, CBX2, PTPN12, KLF4, FOSL2, COPRS, FMNL1, ZEB1, TBL1XR1, PDCD4, PLCD3, MDGA2, FGF13	53	5475	16792	1.73606	0.594389	0.0836302	0.0830607
GOTERM_BP_ALL	GO:0009890~negative regulation of biosynthetic process	14	24.5614	0.000519043	TLE4, HEXIM1, TLE1, CBX2, KLF4, NOC2L, BACH1, HDAC6, ZEB1, FGF9, TBL1XR1, CCL5, CCL3, PDCD4	53	1504	16792	2.94922	0.628836	0.0836302	0.0830607
GOTERM_BP_ALL	GO:0051172~negative regulation of nitrogen compound metabolic process	14	24.5614	0.000525701	TLE4, HEXIM1, TLE1, CBX2, KLF4, NOC2L, BACH1, HDAC6, ZEB1, FGF9, TBL1XR1, CCL5, CCL3, PDCD4	53	1506	16792	2.9453	0.633526	0.0836302	0.0830607
GOTERM_BP_ALL	GO:0045892~negative regulation of transcription, DNA-templated	12	21.0526	0.000570861	TLE4, HEXIM1, TLE1, ZEB1, FGF9, TBL1XR1, CBX2, PDCD4, KLF4, NOC2L, BACH1, HDAC6	53	1130	16792	3.36457	0.663812	0.0838287	0.0832579
GOTERM_BP_ALL	GO:0044699~single-organism process	51	89.4737	0.000728591	CPQ, LRRC4, NOC2L, BACH1, AFF2, PPP3CC, FGF9, PSD4, TK2, PRKACA, SYNPO, TLE4, BNIP3L, TLE1, ARL4C, ZEB1, STIM2, SLCO4A1, TBL1XR1, RNASEH2B, SDC2, ATP10A, HDAC6, RRP7A, ADAP2, ZMAT3, CALD1, CCL5, CCL3, HIVEP2, ATP6V1C1, RAB11FIP4, GINS1, HEXIM1, PCDH9, CBX2, PTPN12, KLF4, CABLES2, FOSL2, SLC2A9, COPRS, FMNL1, FMNL2, PDCD4, CDK2AP1, NUP35, PLCD3, MDGA2, FGF13, FARSB	53	13377	16792	1.20792	0.75127	0.0993486	0.0986721
GOTERM_BP_ALL	GO:1903507~negative regulation of nucleic acid-templated transcription	12	21.0526	0.000802418	TLE4, HEXIM1, TLE1, ZEB1, FGF9, TBL1XR1, CBX2, PDCD4, KLF4, NOC2L, BACH1, HDAC6	53	1177	16792	3.23021	0.78399	0.102121	0.101426
GOTERM_BP_ALL	GO:0090304~nucleic acid metabolic process	28	49.1228	0.00113241	RBM28, RNASEH2B, NOC2L, NAT14, BACH1, HDAC6, AFF2, RRP7A, FGF9, CCL5, CCL3, TK2, HIVEP2, PRKACA, GINS1, TLE4, HEXIM1, TLE1, CBX2, KLF4, FOSL2, COPRS, ZEB1, TBL1XR1, PDCD4, CDK2AP1, NUP35, FARSB	53	5158	16792	1.7199	0.88502	0.135111	0.13419
GOTERM_BP_ALL	GO:0010605~negative regulation of macromolecule metabolic process	17	29.8246	0.00129764	TLE4, HEXIM1, RNASEH2B, TLE1, CBX2, LRRC4, KLF4, NOC2L, BACH1, HDAC6, ZEB1, FGF9, TBL1XR1, CCL5, CCL3, PDCD4, NUP35	53	2326	16792	2.31561	0.916156	0.145717	0.144725
GOTERM_BP_ALL	GO:2000113~negative regulation of cellular macromolecule biosynthetic process	12	21.0526	0.00208647	TLE4, HEXIM1, TLE1, ZEB1, FGF9, TBL1XR1, CBX2, PDCD4, KLF4, NOC2L, BACH1, HDAC6	53	1324	16792	2.87157	0.981449	0.221281	0.219775
GOTERM_BP_ALL	GO:0009892~negative regulation of metabolic process	17	29.8246	0.00304696	TLE4, HEXIM1, RNASEH2B, TLE1, CBX2, LRRC4, KLF4, NOC2L, BACH1, HDAC6, ZEB1, FGF9, TBL1XR1, CCL5, CCL3, PDCD4, NUP35	53	2522	16792	2.13565	0.997049	0.306139	0.304055
GOTERM_BP_ALL	GO:0016070~RNA metabolic process	25	43.8596	0.00333962	RBM28, RNASEH2B, NOC2L, NAT14, BACH1, HDAC6, AFF2, RRP7A, FGF9, CCL5, CCL3, HIVEP2, PRKACA, TLE4, HEXIM1, TLE1, CBX2, KLF4, FOSL2, COPRS, ZEB1, TBL1XR1, PDCD4, NUP35, FARSB	53	4648	16792	1.70412	0.998315	0.318767	0.316596
GOTERM_BP_ALL	GO:0006725~cellular aromatic compound metabolic process	29	50.8772	0.0051418	RBM28, RNASEH2B, CPQ, NOC2L, NAT14, BACH1, HDAC6, AFF2, RRP7A, FGF9, CCL5, CCL3, TK2, HIVEP2, PRKACA, GINS1, TLE4, HEXIM1, TLE1, CBX2, KLF4, FOSL2, COPRS, ZEB1, TBL1XR1, PDCD4, CDK2AP1, NUP35, FARSB	53	5965	16792	1.54033	0.999947	0.467414	0.464231
GOTERM_BP_ALL	GO:0007275~multicellular organism development	25	43.8596	0.00651996	RNASEH2B, SDC2, HDAC6, AFF2, RRP7A, PPP3CC, ADAP2, FGF9, CCL3, HIVEP2, PRKACA, RAB11FIP4, GINS1, HEXIM1, TLE1, PCDH9, CBX2, KLF4, FOSL2, COPRS, ZEB1, TBL1XR1, PLCD3, MDGA2, FGF13	53	4877	16792	1.6241	0.999996	0.565754	0.561902
GOTERM_BP_ALL	GO:0006139~nucleobase-containing compound metabolic process	28	49.1228	0.00722182	RBM28, RNASEH2B, NOC2L, NAT14, BACH1, HDAC6, AFF2, RRP7A, FGF9, CCL5, CCL3, TK2, HIVEP2, PRKACA, GINS1, TLE4, HEXIM1, TLE1, CBX2, KLF4, FOSL2, COPRS, ZEB1, TBL1XR1, PDCD4, CDK2AP1, NUP35, FARSB	53	5794	16792	1.53111	0.999999	0.599411	0.595329
GOTERM_BP_ALL	GO:1901360~organic cyclic compound metabolic process	29	50.8772	0.00827226	RBM28, RNASEH2B, CPQ, NOC2L, NAT14, BACH1, HDAC6, AFF2, RRP7A, FGF9, CCL5, CCL3, TK2, HIVEP2, PRKACA, GINS1, TLE4, HEXIM1, TLE1, CBX2, KLF4, FOSL2, COPRS, ZEB1, TBL1XR1, PDCD4, CDK2AP1, NUP35, FARSB	53	6149	16792	1.49424	1	0.61126	0.607097
GOTERM_BP_ALL	GO:0043009~chordate embryonic development	7	12.2807	0.00854297	RRP7A, GINS1, RNASEH2B, ZEB1, FGF9, PLCD3, PRKACA	53	577	16792	3.84369	1	0.61126	0.607097
GOTERM_BP_ALL	GO:0043068~positive regulation of programmed cell death	7	12.2807	0.00854297	BNIP3L, PPP3CC, ZMAT3, CCL5, PDCD4, CCL3, HDAC6	53	577	16792	3.84369	1	0.61126	0.607097
GOTERM_BP_ALL	GO:0009792~embryo development ending in birth or egg hatching	7	12.2807	0.00896557	RRP7A, GINS1, RNASEH2B, ZEB1, FGF9, PLCD3, PRKACA	53	583	16792	3.80414	1	0.61126	0.607097
GOTERM_BP_ALL	GO:0048589~developmental growth	7	12.2807	0.00896557	GINS1, FGF9, CPQ, TBL1XR1, PTPN12, FGF13, HDAC6	53	583	16792	3.80414	1	0.61126	0.607097
GOTERM_BP_ALL	GO:0046483~heterocycle metabolic process	28	49.1228	0.0099095	RBM28, RNASEH2B, NOC2L, NAT14, BACH1, HDAC6, AFF2, RRP7A, FGF9, CCL5, CCL3, TK2, HIVEP2, PRKACA, GINS1, TLE4, HEXIM1, TLE1, CBX2, KLF4, FOSL2, COPRS, ZEB1, TBL1XR1, PDCD4, CDK2AP1, NUP35, FARSB	53	5919	16792	1.49877	1	0.646141	0.641741
GOTERM_BP_ALL	GO:0031324~negative regulation of cellular metabolic process	15	26.3158	0.0101541	TLE4, HEXIM1, TLE1, CBX2, LRRC4, KLF4, NOC2L, BACH1, HDAC6, ZEB1, FGF9, TBL1XR1, CCL5, CCL3, PDCD4	53	2345	16792	2.02663	1	0.646141	0.641741
GOTERM_BP_ALL	GO:0010942~positive regulation of cell death	7	12.2807	0.0108077	BNIP3L, PPP3CC, ZMAT3, CCL5, PDCD4, CCL3, HDAC6	53	607	16792	3.65373	1	0.665545	0.661013
GOTERM_BP_ALL	GO:0051252~regulation of RNA metabolic process	20	35.0877	0.0144438	TLE4, HEXIM1, TLE1, CBX2, KLF4, NOC2L, NAT14, BACH1, HDAC6, FOSL2, AFF2, COPRS, ZEB1, FGF9, TBL1XR1, CCL5, CCL3, PDCD4, NUP35, HIVEP2	53	3762	16792	1.68437	1	0.86166	0.855792
GOTERM_BP_ALL	GO:0010468~regulation of gene expression	22	38.5965	0.0154909	TLE4, HEXIM1, RNASEH2B, TLE1, CBX2, KLF4, NOC2L, NAT14, BACH1, HDAC6, FOSL2, AFF2, COPRS, ZEB1, FGF9, TBL1XR1, CCL5, CCL3, PDCD4, NUP35, HIVEP2, PRKACA	53	4345	16792	1.6042	1	0.896127	0.890025
GOTERM_BP_ALL	GO:0001932~regulation of protein phosphorylation	10	17.5439	0.0173196	HEXIM1, FGF9, CCL5, PDCD4, LRRC4, CCL3, CDK2AP1, FGF13, KLF4, PRKACA	53	1300	16792	2.43716	1	0.972447	0.965825
GOTERM_BP_ALL	GO:0065007~biological regulation	44	77.193	0.0179528	RNASEH2B, CPQ, SDC2, LRRC4, ATP10A, NOC2L, NAT14, BACH1, HDAC6, AFF2, PPP3CC, ADAP2, FGF9, ZMAT3, CCL5, PSD4, CCL3, HIVEP2, SYNPO, PRKACA, ATP6V1C1, RAB11FIP4, TLE4, HEXIM1, BNIP3L, TLE1, CBX2, PTPN12, KLF4, CABLES2, FOSL2, ARL4C, COPRS, FMNL1, ZEB1, FMNL2, SLCO4A1, STIM2, TBL1XR1, PDCD4, CDK2AP1, NUP35, PLCD3, FGF13	53	11548	16792	1.20718	1	0.979197	0.972528
GOTERM_BP_ALL	GO:0034641~cellular nitrogen compound metabolic process	29	50.8772	0.0190706	RBM28, RNASEH2B, CPQ, NOC2L, NAT14, BACH1, HDAC6, AFF2, RRP7A, FGF9, CCL5, CCL3, TK2, HIVEP2, PRKACA, GINS1, TLE4, HEXIM1, TLE1, CBX2, KLF4, FOSL2, COPRS, ZEB1, TBL1XR1, PDCD4, CDK2AP1, NUP35, FARSB	53	6505	16792	1.41246	1	0.979927	0.973254
GOTERM_BP_ALL	GO:0010467~gene expression	25	43.8596	0.0194858	RBM28, RNASEH2B, NOC2L, NAT14, BACH1, HDAC6, AFF2, RRP7A, FGF9, CCL5, CCL3, HIVEP2, PRKACA, TLE4, HEXIM1, TLE1, CBX2, KLF4, FOSL2, COPRS, ZEB1, TBL1XR1, PDCD4, NUP35, FARSB	53	5306	16792	1.49279	1	0.979927	0.973254
GOTERM_BP_ALL	GO:0050794~regulation of cellular process	41	71.9298	0.0195062	RNASEH2B, SDC2, LRRC4, ATP10A, NOC2L, NAT14, BACH1, HDAC6, AFF2, PPP3CC, FGF9, ZMAT3, CCL5, PSD4, CCL3, HIVEP2, SYNPO, PRKACA, ATP6V1C1, RAB11FIP4, TLE4, HEXIM1, BNIP3L, TLE1, CBX2, PTPN12, KLF4, CABLES2, FOSL2, ARL4C, COPRS, FMNL1, ZEB1, FMNL2, STIM2, TBL1XR1, PDCD4, CDK2AP1, NUP35, PLCD3, FGF13	53	10489	16792	1.23844	1	0.979927	0.973254
GOTERM_BP_ALL	GO:2000503~positive regulation of natural killer cell chemotaxis	2	3.50877	0.0214804	CCL5, CCL3	53	7	16792	90.5229	1	1	0.993711
GOTERM_BP_ALL	GO:0006366~transcription from RNA polymerase II promoter	12	21.0526	0.0216635	TLE4, HEXIM1, TLE1, ZEB1, FGF9, TBL1XR1, CBX2, HIVEP2, KLF4, NOC2L, BACH1, FOSL2	53	1820	16792	2.08899	1	1	0.993711
GOTERM_BP_ALL	GO:2001141~regulation of RNA biosynthetic process	19	33.3333	0.0220941	TLE4, HEXIM1, TLE1, CBX2, KLF4, NOC2L, NAT14, BACH1, HDAC6, FOSL2, COPRS, ZEB1, FGF9, TBL1XR1, CCL5, CCL3, PDCD4, NUP35, HIVEP2	53	3644	16792	1.65197	1	1	0.993711
GOTERM_BP_ALL	GO:0051128~regulation of cellular component organization	14	24.5614	0.0222668	BNIP3L, SDC2, LRRC4, ATP10A, KLF4, NOC2L, HDAC6, FMNL1, FMNL2, PPP3CC, CCL3, FGF13, SYNPO, PRKACA	53	2323	16792	1.90944	1	1	0.993711
GOTERM_BP_ALL	GO:0048513~animal organ development	17	29.8246	0.0238654	HEXIM1, TLE1, PCDH9, KLF4, FOSL2, AFF2, COPRS, ZEB1, ADAP2, PPP3CC, FGF9, TBL1XR1, CCL3, PLCD3, MDGA2, FGF13, RAB11FIP4	53	3129	16792	1.72135	1	1	0.993711
GOTERM_BP_ALL	GO:0019220~regulation of phosphate metabolic process	11	19.2982	0.0241916	HEXIM1, FGF9, TBL1XR1, CCL5, PDCD4, LRRC4, CCL3, CDK2AP1, FGF13, KLF4, PRKACA	53	1610	16792	2.16468	1	1	0.993711
GOTERM_BP_ALL	GO:0051174~regulation of phosphorus metabolic process	11	19.2982	0.0242849	HEXIM1, FGF9, TBL1XR1, CCL5, PDCD4, LRRC4, CCL3, CDK2AP1, FGF13, KLF4, PRKACA	53	1611	16792	2.16333	1	1	0.993711
GOTERM_BP_ALL	GO:0006807~nitrogen compound metabolic process	30	52.6316	0.0252503	RBM28, RNASEH2B, CPQ, SDC2, NOC2L, NAT14, BACH1, HDAC6, AFF2, RRP7A, FGF9, CCL5, CCL3, TK2, HIVEP2, PRKACA, GINS1, TLE4, HEXIM1, TLE1, CBX2, KLF4, FOSL2, COPRS, ZEB1, TBL1XR1, PDCD4, CDK2AP1, NUP35, FARSB	53	6948	16792	1.36801	1	1	0.993711
GOTERM_BP_ALL	GO:0051924~regulation of calcium ion transport	4	7.01754	0.0252564	STIM2, CCL5, CCL3, PRKACA	53	204	16792	6.21236	1	1	0.993711
GOTERM_BP_ALL	GO:0042325~regulation of phosphorylation	10	17.5439	0.0259116	HEXIM1, FGF9, CCL5, PDCD4, LRRC4, CCL3, CDK2AP1, FGF13, KLF4, PRKACA	53	1393	16792	2.27445	1	1	0.993711
GOTERM_BP_ALL	GO:0009790~embryo development	8	14.0351	0.0268493	RRP7A, GINS1, RNASEH2B, ZEB1, FGF9, KLF4, PLCD3, PRKACA	53	954	16792	2.65686	1	1	0.993711
GOTERM_BP_ALL	GO:0043067~regulation of programmed cell death	10	17.5439	0.028102	BNIP3L, TLE1, PPP3CC, ZMAT3, CCL5, PDCD4, CCL3, KLF4, NOC2L, HDAC6	53	1413	16792	2.24225	1	1	0.993711
GOTERM_BP_ALL	GO:0035556~intracellular signal transduction	15	26.3158	0.0281653	HEXIM1, TLE1, LRRC4, KLF4, NOC2L, ARL4C, FGF9, ZMAT3, CCL5, PSD4, CCL3, PDCD4, PLCD3, FGF13, PRKACA	53	2657	16792	1.78865	1	1	0.993711
GOTERM_BP_ALL	GO:0009059~macromolecule biosynthetic process	24	42.1053	0.0282937	GINS1, TLE4, HEXIM1, TLE1, SDC2, CBX2, KLF4, NOC2L, NAT14, BACH1, HDAC6, FOSL2, COPRS, ZEB1, FGF9, TBL1XR1, CCL5, CCL3, PDCD4, CDK2AP1, NUP35, TK2, HIVEP2, FARSB	53	5175	16792	1.46936	1	1	0.993711
GOTERM_BP_ALL	GO:0031399~regulation of protein modification process	11	19.2982	0.0296183	HEXIM1, FGF9, CCL5, PDCD4, LRRC4, CCL3, CDK2AP1, FGF13, KLF4, NOC2L, PRKACA	53	1664	16792	2.09443	1	1	0.993711
GOTERM_BP_ALL	GO:2000501~regulation of natural killer cell chemotaxis	2	3.50877	0.0305472	CCL5, CCL3	53	10	16792	63.366	1	1	0.993711
GOTERM_BP_ALL	GO:0022604~regulation of cell morphogenesis	6	10.5263	0.0306526	FMNL1, FMNL2, SDC2, CCL3, ATP10A, FGF13	53	568	16792	3.3468	1	1	0.993711
GOTERM_BP_ALL	GO:0043065~positive regulation of apoptotic process	6	10.5263	0.0314609	BNIP3L, PPP3CC, ZMAT3, CCL5, PDCD4, CCL3	53	572	16792	3.32339	1	1	0.993711
GOTERM_BP_ALL	GO:0048245~eosinophil chemotaxis	2	3.50877	0.0335511	CCL5, CCL3	53	11	16792	57.6055	1	1	0.993711
GOTERM_BP_ALL	GO:0043549~regulation of kinase activity	7	12.2807	0.0340841	HEXIM1, CCL5, PDCD4, LRRC4, FGF13, KLF4, PRKACA	53	788	16792	2.81448	1	1	0.993711
GOTERM_BP_ALL	GO:0036211~protein modification process	19	33.3333	0.0342401	HEXIM1, CBX2, LRRC4, PTPN12, KLF4, NOC2L, BACH1, HDAC6, COPRS, PPP3CC, FGF9, TBL1XR1, CCL5, CCL3, PDCD4, CDK2AP1, NUP35, FGF13, PRKACA	53	3818	16792	1.57668	1	1	0.993711
GOTERM_BP_ALL	GO:0006464~cellular protein modification process	19	33.3333	0.0342401	HEXIM1, CBX2, LRRC4, PTPN12, KLF4, NOC2L, BACH1, HDAC6, COPRS, PPP3CC, FGF9, TBL1XR1, CCL5, CCL3, PDCD4, CDK2AP1, NUP35, FGF13, PRKACA	53	3818	16792	1.57668	1	1	0.993711
GOTERM_BP_ALL	GO:0009966~regulation of signal transduction	15	26.3158	0.0344778	HEXIM1, TLE1, LRRC4, PTPN12, KLF4, NOC2L, HDAC6, ZEB1, PPP3CC, FGF9, CCL5, PSD4, CCL3, PDCD4, PRKACA	53	2728	16792	1.7421	1	1	0.993711
GOTERM_BP_ALL	GO:0019219~regulation of nucleobase-containing compound metabolic process	20	35.0877	0.0345281	TLE4, HEXIM1, TLE1, CBX2, KLF4, NOC2L, NAT14, BACH1, HDAC6, FOSL2, AFF2, COPRS, ZEB1, FGF9, TBL1XR1, CCL5, CCL3, PDCD4, NUP35, HIVEP2	53	4104	16792	1.54401	1	1	0.993711
GOTERM_BP_ALL	GO:1902531~regulation of intracellular signal transduction	11	19.2982	0.0353837	HEXIM1, TLE1, FGF9, CCL5, PSD4, PDCD4, LRRC4, CCL3, KLF4, NOC2L, PRKACA	53	1714	16792	2.03333	1	1	0.993711
GOTERM_BP_ALL	GO:0035747~natural killer cell chemotaxis	2	3.50877	0.0365459	CCL5, CCL3	53	12	16792	52.805	1	1	0.993711
GOTERM_BP_ALL	GO:0043922~negative regulation by host of viral transcription	2	3.50877	0.0395316	CCL5, CCL3	53	13	16792	48.7431	1	1	0.993711
GOTERM_BP_ALL	GO:0048522~positive regulation of cellular process	22	38.5965	0.0397647	HEXIM1, BNIP3L, RNASEH2B, KLF4, NAT14, BACH1, HDAC6, FOSL2, ZEB1, PPP3CC, FGF9, TBL1XR1, ZMAT3, STIM2, CCL5, CCL3, PDCD4, CDK2AP1, FGF13, SYNPO, PRKACA, RAB11FIP4	53	4744	16792	1.46928	1	1	0.993711
GOTERM_BP_ALL	GO:0010941~regulation of cell death	10	17.5439	0.0404838	BNIP3L, TLE1, PPP3CC, ZMAT3, CCL5, PDCD4, CCL3, KLF4, NOC2L, HDAC6	53	1509	16792	2.0996	1	1	0.993711
GOTERM_BP_ALL	GO:0051928~positive regulation of calcium ion transport	3	5.26316	0.0419411	STIM2, CCL5, CCL3	53	105	16792	9.05229	1	1	0.993711
GOTERM_BP_ALL	GO:0032774~RNA biosynthetic process	19	33.3333	0.0419714	TLE4, HEXIM1, TLE1, CBX2, KLF4, NOC2L, NAT14, BACH1, HDAC6, FOSL2, COPRS, ZEB1, FGF9, TBL1XR1, CCL5, CCL3, PDCD4, NUP35, HIVEP2	53	3905	16792	1.54156	1	1	0.993711
GOTERM_BP_ALL	GO:0006796~phosphate-containing compound metabolic process	16	28.0702	0.0432535	HEXIM1, RNASEH2B, LRRC4, PTPN12, KLF4, PPP3CC, FGF9, TBL1XR1, CCL5, CCL3, PDCD4, CDK2AP1, TK2, PLCD3, FGF13, PRKACA	53	3083	16792	1.64427	1	1	0.993711
GOTERM_BP_ALL	GO:0006793~phosphorus metabolic process	16	28.0702	0.0439087	HEXIM1, RNASEH2B, LRRC4, PTPN12, KLF4, PPP3CC, FGF9, TBL1XR1, CCL5, CCL3, PDCD4, CDK2AP1, TK2, PLCD3, FGF13, PRKACA	53	3089	16792	1.64108	1	1	0.993711
GOTERM_BP_ALL	GO:0072677~eosinophil migration	2	3.50877	0.0454757	CCL5, CCL3	53	15	16792	42.244	1	1	0.993711
GOTERM_BP_ALL	GO:0070848~response to growth factor	6	10.5263	0.0457346	ZEB1, FGF9, CCL5, PTPN12, KLF4, HDAC6	53	634	16792	2.99839	1	1	0.993711
GOTERM_BP_ALL	GO:0050789~regulation of biological process	41	71.9298	0.0458369	RNASEH2B, SDC2, LRRC4, ATP10A, NOC2L, NAT14, BACH1, HDAC6, AFF2, PPP3CC, FGF9, ZMAT3, CCL5, PSD4, CCL3, HIVEP2, SYNPO, PRKACA, ATP6V1C1, RAB11FIP4, TLE4, HEXIM1, BNIP3L, TLE1, CBX2, PTPN12, KLF4, CABLES2, FOSL2, ARL4C, COPRS, FMNL1, ZEB1, FMNL2, STIM2, TBL1XR1, PDCD4, CDK2AP1, NUP35, PLCD3, FGF13	53	10922	16792	1.18935	1	1	0.993711
GOTERM_BP_ALL	GO:0009968~negative regulation of signal transduction	8	14.0351	0.0494856	TLE1, FGF9, CCL5, PDCD4, LRRC4, KLF4, NOC2L, PRKACA	53	1089	16792	2.32749	1	1	0.993711
