# Supplementary material for: Evidence for additive and synergistic action of mammalian enhancers during cell fate determination
Source: eLife. 2021 Mar 26;10:e65381. doi: 10.7554/eLife.65381 (PMC8004103; doi:10.7554/eLife.65381)
Supplement: Supplementary file 7. [file elife-65381-supp7.xlsx]

## Sheet: Sheet1
CEBP0-1.bam			K4me10_1.bam		AK0_1.bam		Brd0-1.bam		0-1-L.bam				0-1-T.bam
47069290	23534645		176785036	88392518	32209404	16104702	29716058	14858029	45042728	22521364	151362258		13694882	6847441
CEBP0-2.bam			K4me10_2.bam		AK0_2.bam		Brd0-2.bam		0-2-L.bam				0-2-T.bam
45050032	22525016		150574964	75287482	29789358	14894679	38807880	19403940	50867254	25433627	198732202		24204724	12102362
CEBP12-1.bam			K4me11_1.bam		AK12_1.bam		Brd12-1.bam		12-1-L.bam				12-1-T.bam
56771620	28385810		183718442	91859221	44121786	22060893	43472166	21736083	57446220	28723110	179610228		18319184	9159592
CEBP12-2.bam			K4me1-12-1.bam		AK12_2.bam		Brd12-2.bam		12-2-L.bam				12-2-T.bam
243587516	121793758		60932786	30466393	59646776	29823388	48655960	24327980	68906796	34453398	175999577		20399974	10199987
CEBP168-1.bam			K4me1-12-2.bam		AK168_1.bam		Brd24-1.bam		24-1-L.bam				168-2-T.bam
42829822	21414911		65686082	32843041	72126326	36063163	43561568	21780784	45440902	22720451	174501498		6887412	3443706
CEBP168-2.bam			K4me11_2.bam		AK168_2.bam		Brd24-2.bam		24-2-L.bam				168-3-T.bam
38336308	19168154		219840552	109920276	72551846	36275923	24031286	12015643	43642800	21821400	171841491		10748346	5374173
CEBP24-1.bam			K4me14_1.bam		AK24_1.bam		Brd96-1.bam		30-1_L.bam				24-1-T.bam
47969900	23984950		127492480	63746240	60366618	30183309	17989824	8994912	272071176		136035588		31648674	15824337
CEBP24-2.bam			K4me14_2.bam		AK24_2.bam		Brd96-2.bam		30-2_L.bam				24-2-T.bam
51108784	25554392		107794194	53897097	47678996	23839498	38104472	19052236	279305654		139652827		26592624	13296312
CEBP96-1.bam			K4me17_1.bam		AK96_1.bam				36-1_L.bam				30-1-T.bam
41174964	20587482		84594810	42297405	68057998	34028999			293173302		146586651		31111838	15555919
CEBP96-2.bam			K4me17_2.bam		AK96_2.bam				36-2_L.bam				30-2-T.bam
51217900	25608950		36173796	18086898	59881044	29940522			292726136		146363068		15771994	7885997
	3.32558e+07			6.06797e+07		2.73215e+07		1.77712e+07	72-1_L.bam				36-1-T.bam
									292191398		146095699		26686316	13343158
									72-2_L.bam				36-2-T.bam
									282264080		141132040		31685706	15842853
									96-1-L.bam				48-1-T.bam
									48066922		179386079		16573660	8286830
									96-2-L.bam				48-2-T.bam
									47852954		146575180		25501812	12750906
											1.59562e+08		72-1-T.bam
													34655980	17327990
													72-2-T.bam
													31128806	15564403
													96-1-T.bam
													13959950	6979975
													96-2-T.bam
													19461070	9730535
														1.10842e+07

## Sheet: Sheet2
Read Numer		0	12	24	30	36	48	72	96	168
RNA-seq	rep1	6847441	9159592	15824337	15555919	13343158	8286830	17327990	6979975	3443706
	rep2	12102362	10199987	13296312	7885997	15842853	12750906	15564403	9730535	5374173
TT-seq	rep1	151362258	179610228	174501498	136035588	146586651	-	146095699	179386079	-
	rep2	198732202	175999577	171841491	139652827	146363068	-	141132040	146575180	-
ATAC-seq	rep1	16104702	22060893	30183309	-	-	-	-	34028999	-
	rep2	14894679	29823388	23839498	-	-	-	-	29940522	-
C/EBPa	rep1	23534645	28385810	23984950	-	-	-	-	20587482	-
	rep2	22525016	121793758	25554392	-	-	-	-	25608950	-
H3K4me1	rep1	88392518	30466393	91859221	-	-	-	-	63746240	-
	rep2	75287482	32843041	109920276	-	-	-	-	53897097	-
BRD4	rep1	14858029	21736083	21780784	-	-	-	-	8994912	-
	rep2	19403940	24327980	12015643	-	-	-	-	19052236	-
Spearman's Rho between replicates	0	12	24	30	36	72	96
RNA-seq	1	1	1	1	1	1	1
TT-seq	0.99	1	0.99	1	1	0.99	0.99
ATAC-seq	0.8	0.86	0.89				0.9
C/EBPa	0.94	0.98	0.95				0.94
H3K4me1	1	0.99	0.99				0.96
BRD4	0.88	0.99	0.72				0.83
FRiP	0-1	0-2	12-1	12-2	24-1	24-2	96-1	96-2	Peak Numbers
ATAC-seq	0.335437	0.327351	0.301731	0.328821	0.322445	0.352291	0.330396	0.314429	288124
C/EBPa	0.00529679	0.00541469	0.0101894	0.0090897	0.0106849	0.00865577	0.00626478	0.00683566	14561
H3K4me1	0.113979	0.131261	0.316806	0.271676	0.138322	0.102518	0.0808221	0.0423006	55904
BRD4	0.157874	0.0989973	0.0530216	0.0503666	0.0641547	0.227779	0.112969	0.0548895	98757
